# Supplementary material for: Morphological Characterization of Root System Architecture in Diverse Tomato Genotypes during Early Growth
Source: MDPI journal article supplement (doi:10.3390/ijms19123888), 2018-12-05
Supplement: s1 [file s1]

Figure S4

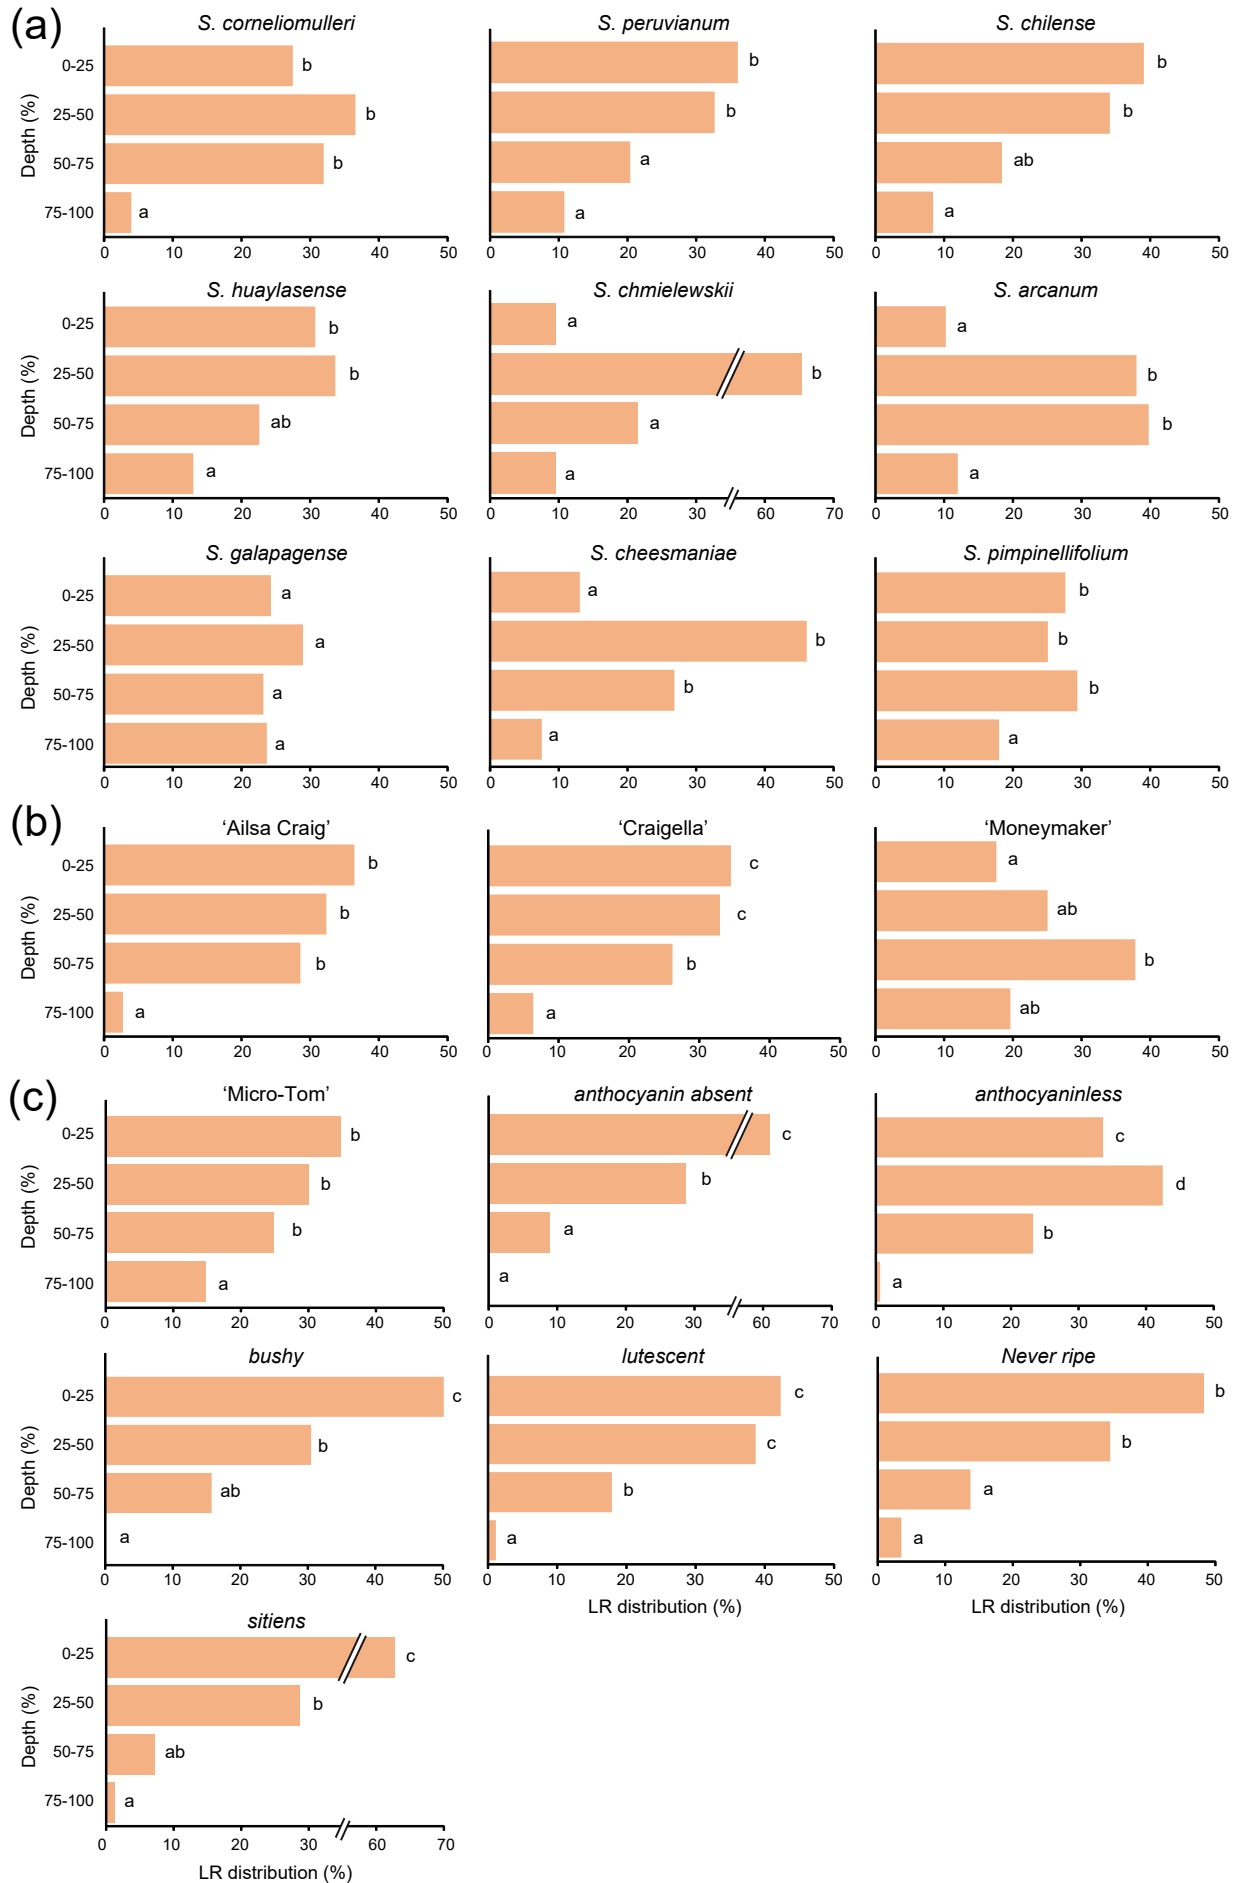

**Figure S4.** LR distribution in the studied genotypes. **(a-c)** Average percentages of LR distribution along the length of the PR in **(a)** wild tomato species, **(b)** commercial tomato cultivars, and **(c)** developmental mutants in the 'Micro-Tom' genetic background. Different letters indicate significant differences (LSD;  $p$ -value<0.01) with regard to PR length (i.e., root depth).
