# Supplementary material for: Morphological Characterization of Root System Architecture in Diverse Tomato Genotypes during Early Growth
Source: MDPI journal article supplement (doi:10.3390/ijms19123888), 2018-12-05
Supplement: s1 [file s1]

Figure S6

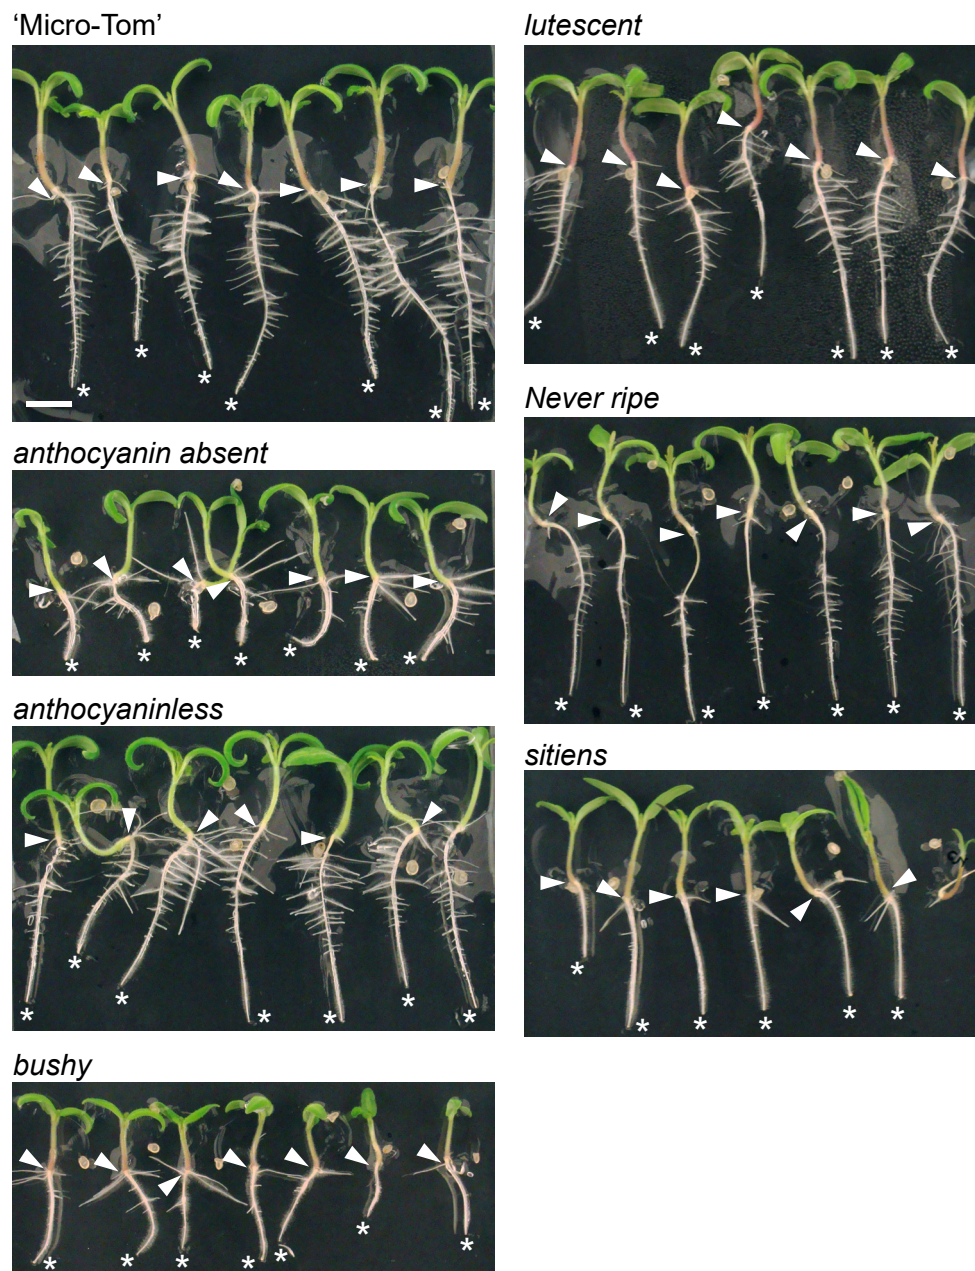

**Figure S6.** RSA after PR tip excision in 'Micro-Tom' developmental mutants. Arrowheads point to the root-hypocotyl junction, and the asterisks indicate the distal end of the PR after excision. Scale bar: 10 mm.
