# Supplementary material for: Morphological Characterization of Root System Architecture in Diverse Tomato Genotypes during Early Growth
Source: MDPI journal article supplement (doi:10.3390/ijms19123888), 2018-12-05
Supplement: s1 [file s1]

Figure S5

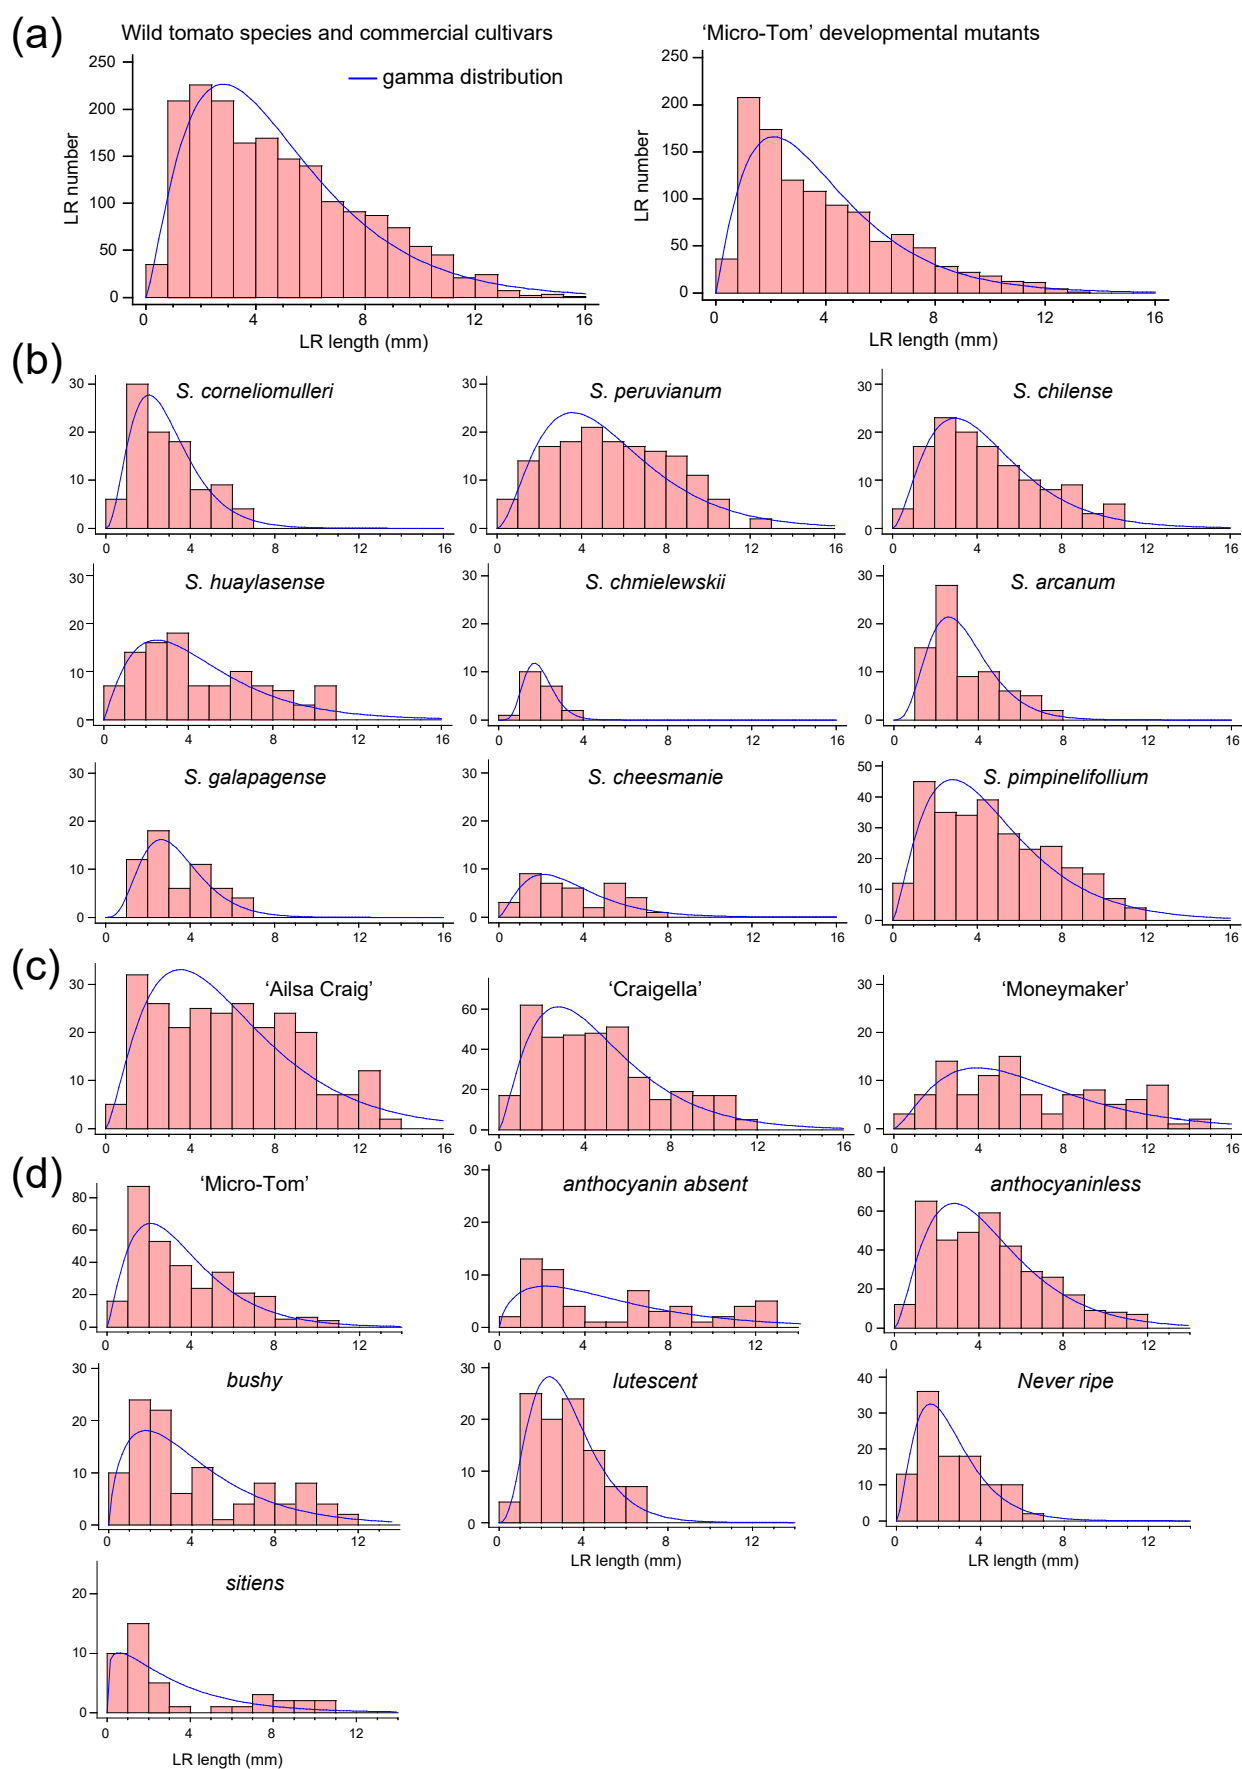

**Figure S5.** LR length distribution in the studied genotypes. (a) Histograms for LR length in wild tomato species and commercial tomato cultivars (left), as well as in 'Micro-Tom' developmental mutants (right), with an overlay of the theoretical gamma distribution. (b-d) Histograms for LR length in (b) wild tomato species, (c) commercial tomato cultivars, and (d) 'Micro-Tom' developmental mutants.
