# Supplementary material for: Morphological Characterization of Root System Architecture in Diverse Tomato Genotypes during Early Growth
Source: MDPI journal article supplement (doi:10.3390/ijms19123888), 2018-12-05
Supplement: s1 [file s1]

**Table 1.** RSA traits measured in this study.

| Studied trait                 | Description                                                              | Measured                                                |
|-------------------------------|--------------------------------------------------------------------------|---------------------------------------------------------|
| Germination (%)               | Percentage of seeds with emerged radicle (>2 mm)                         | Between 1 and 4 days after cold storage                 |
| Primary root (PR) length (mm) | Average length of PR after sowing                                        | 0 days after sowing (das), 3 das                        |
| PR growth rate (mm/h)         | Average increase of PR length between 3 and 0 das                        | -                                                       |
| Lateral root (LR) number      | Average number of lateral roots                                          | 3 days after root tip excision (6 das)                  |
| LR distribution (%)           | Average proportion of LRs along quartiles of PR length (i.e. depth)      | 6 das                                                   |
| LR distance (mm)              | Median distance of two consecutive LRs                                   | 6 das                                                   |
| LR length (mm)                | Median length of LRs                                                     | 6 das                                                   |
| LR clustering (%)             | Average percentage of consecutive LRs with the same growth direction     | 6 das                                                   |
| LR growth angle (°)           | Average angle of LR growth vector as regards its PR growth vector        | 6 das                                                   |
| Adventitious root (AR) number | Average number of ARs                                                    | 6 and 12 days after whole root excision (12 and 18 das) |
| AR growth rate (mm/h)         | Average increase of AR length during the first 12 h after AR emergence   | -                                                       |
| AR initiation time (h)        | Average time from whole root excision until AR emergence                 | -                                                       |
| AR response (%)               | Percentage of hypocotyls with emerged ARs                                | 12 and 18 das                                           |
| AR length (mm)                | Median length of ARs                                                     | 12 das                                                  |
| AR growth angle (°)           | Average angle of AR growth vector as regards its hypocotyl growth vector | 12 das                                                  |
| Maximum AR length (mm)        | Maximum length of ARs                                                    | 18 das                                                  |
