# Supplementary material for: Morphological Characterization of Root System Architecture in Diverse Tomato Genotypes during Early Growth
Source: MDPI journal article supplement (doi:10.3390/ijms19123888), 2018-12-05
Supplement: s1 [file s1]

Figure S7

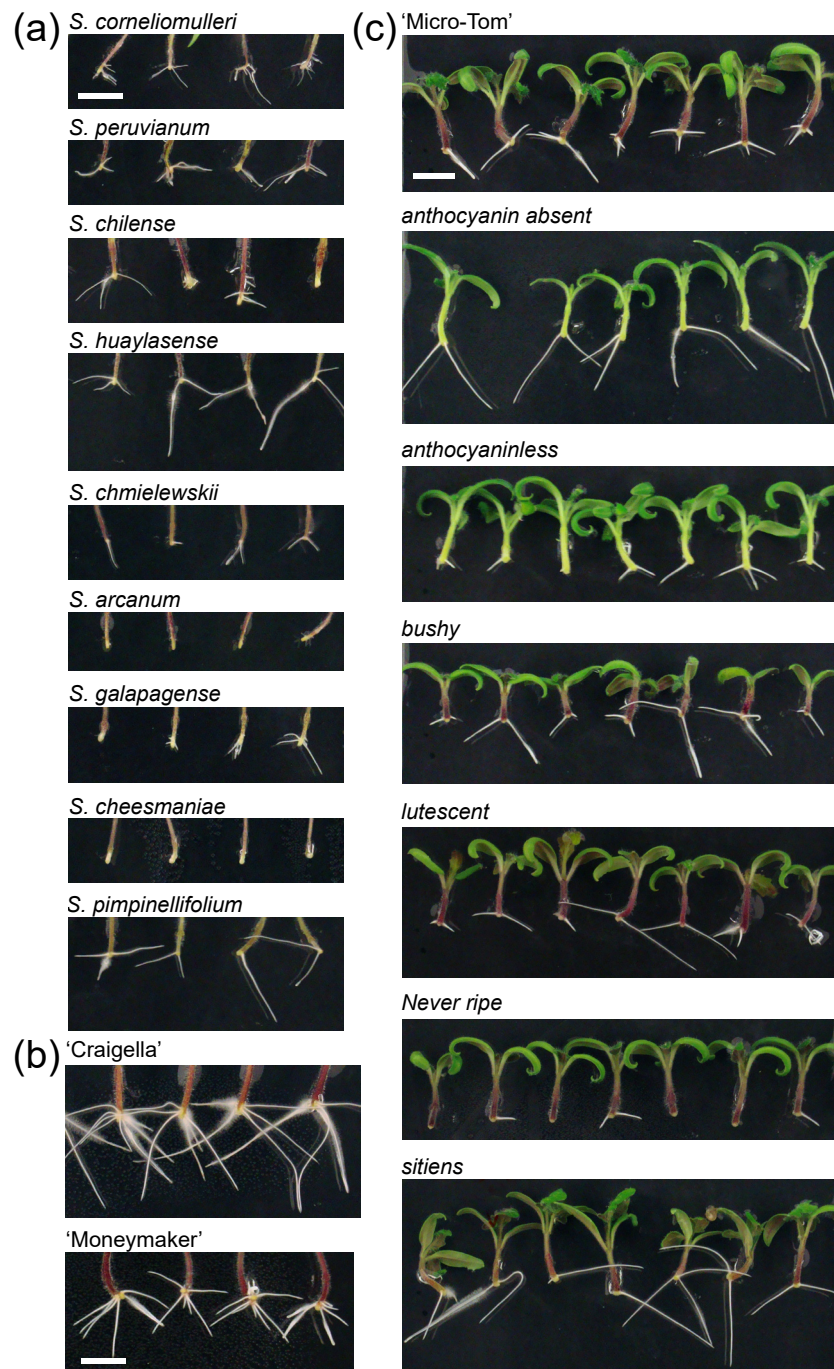

**Figure S7.** ARs in the hypocotyl after whole root excision of selected tomato genotypes. **(a)** Wild tomato species, **(b)** some commercial tomato cultivars, and **(c)** 'Micro-Tom' developmental mutants. Scale bars: 10 mm.
