# Supplementary material for: Morphological Characterization of Root System Architecture in Diverse Tomato Genotypes during Early Growth
Source: MDPI journal article supplement (doi:10.3390/ijms19123888), 2018-12-05
Supplement: s1 [file s1]

Figure S8

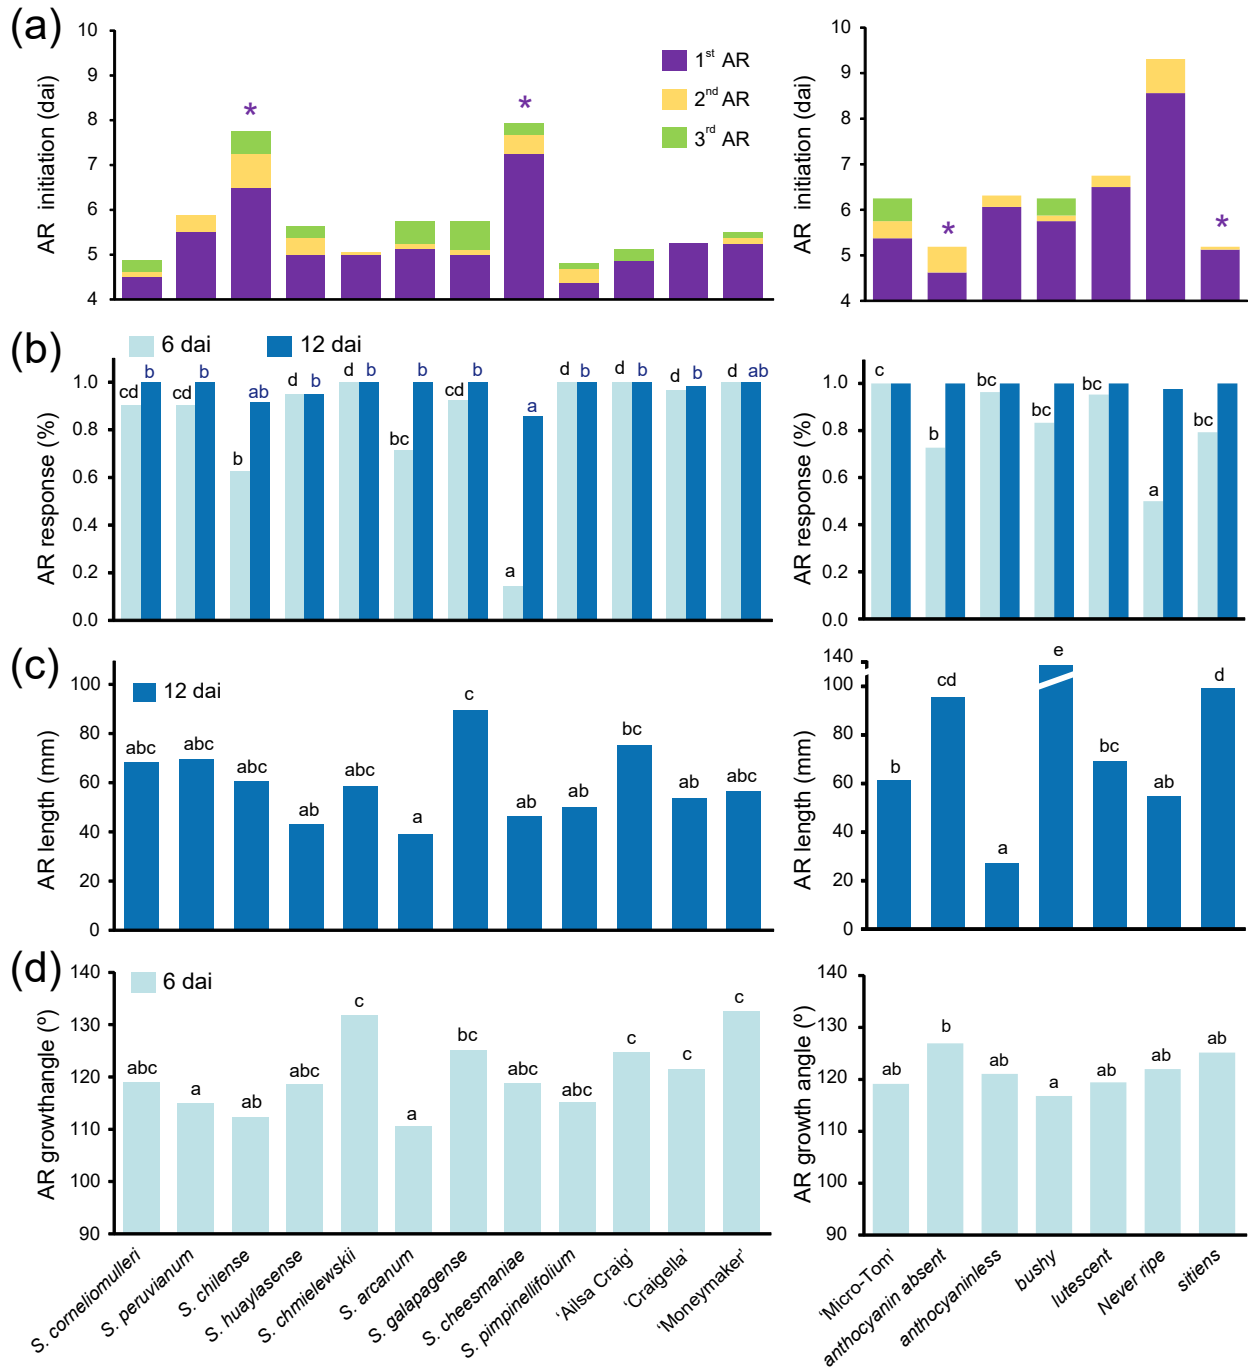

**Figure S8.** Variation of some AR traits after whole root excision. **(a)** Average initiation time of consecutive ARs (first, second and third); dai: days after AR induction. **(b)** AR response estimated as the percentage of hypocotyl explants showing emergence of ARs at the indicated times. Asterisks indicate significant differences (LSD;  $p$ -value<0.01) over genotypes. **(c-d)** Median values of **(c)** AR length and **(d)** AR growth angle. Different letters indicate significant differences (LSD;  $p$ -value<0.01) over genotypes **(c, d)**.
