# Supplementary material for: Morphological Characterization of Root System Architecture in Diverse Tomato Genotypes during Early Growth
Source: MDPI journal article supplement (doi:10.3390/ijms19123888), 2018-12-05
Supplement: s1 [file s1]

**Table S2.** Classification of studied tomato genotypes based on early RSA attributes.

| Genotype                  | PR growth | LR     |          |        |              |              | AR     |        |              |             | RSA ideotype |
|---------------------------|-----------|--------|----------|--------|--------------|--------------|--------|--------|--------------|-------------|--------------|
|                           |           | Number | Distance | Length | Distribution | Growth angle | Number | Length | Growth angle | Growth rate |              |
| <i>S. corneliomulleri</i> | C         | A      | B        | B      | B            | B            | A      | C      | B            | B           | 1            |
| <i>S. peruvianum</i>      | B         | B      | B        | B      | B            | B            | B      | B      | B            | B           | 4            |
| <i>S. chilense</i>        | C         | B      | C        | B      | B            | B            | A      | A      | B            | B           | 1            |
| <i>S. huaylasense</i>     | C         | B      | B        | B      | B            | B            | B      | A      | B            | B           | 1            |
| <i>S. chmielewskii</i>    | A         | A      | A        | A      | C            | B            | B      | A      | B            | B           | 2            |
| <i>S. arcanum</i>         | B         | A      | C        | B      | C            | B            | C      | B      | B            | B           | 3            |
| <i>S. galapagense</i>     | B         | A      | C        | B      | A            | B            | B      | B      | B            | B           | 3            |
| <i>S. cheesmanie</i>      | B         | A      | B        | B      | C            | B            | B      | A      | B            | B           | 3            |
| <i>S. pimpinelifolium</i> | B         | C      | B        | B      | B            | B            | C      | B      | B            | C           | 4            |
| 'Ailsa Craig'             | C         | B      | B        | B      | B            | B            | A      | B      | B            | B           | 4            |
| 'Craigella'               | B         | B      | B        | B      | B            | B            | B      | A      | B            | A           | 4            |
| 'MoneyMaker'              | B         | B      | B        | B      | C            | C            | B      | B      | B            | B           | 5            |
| 'Micro-Tom'               | B         | C      | B        | B      | B            | B            | C      | B      | B            | C           | 6            |
| <i>anthocyanin absent</i> | A         | A      | B        | B      | B            | B            | B      | A      | B            | A           | 8            |
| <i>anthocyaninless</i>    | C         | C      | B        | B      | B            | B            | A      | B      | B            | B           | 6            |
| <i>bushy</i>              | A         | B      | B        | B      | B            | B            | B      | B      | B            | A           | 8            |
| <i>lutescent</i>          | B         | B      | B        | B      | B            | B            | C      | B      | B            | B           | 6            |
| <i>Never ripe</i>         | B         | B      | B        | A      | B            | B            | A      | A      | B            | B           | 7            |
| <i>sitiens</i>            | A         | A      | B        | B      | B            | B            | B      | A      | B            | A           | 8            |
