# Supplementary material for: Morphological Characterization of Root System Architecture in Diverse Tomato Genotypes during Early Growth
Source: MDPI journal article supplement (doi:10.3390/ijms19123888), 2018-12-05
Supplement: s1 [file s1]

Figure S9

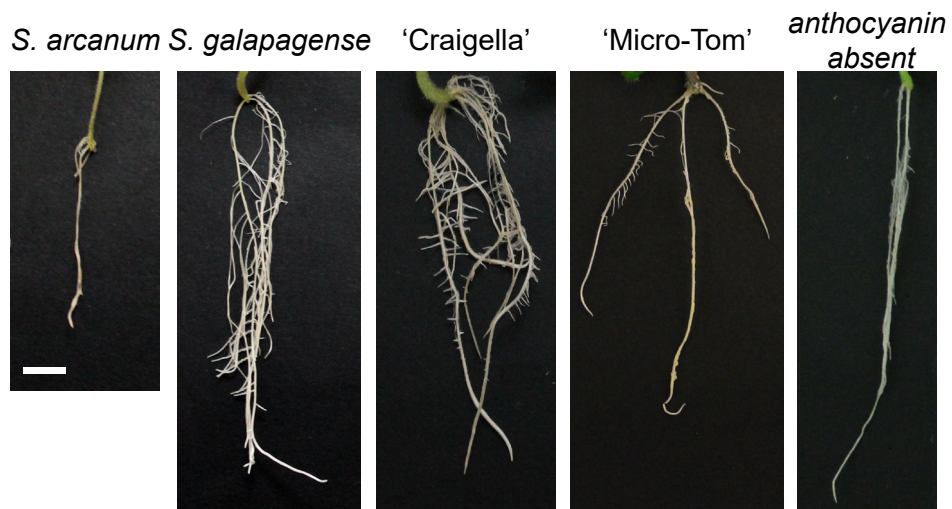

**Figure S9.** ARs in the hypocotyl after whole root excision of selected tomato genotypes. Scale bar: 10 mm.
