# Supplementary material for: Morphological Characterization of Root System Architecture in Diverse Tomato Genotypes during Early Growth
Source: MDPI journal article supplement (doi:10.3390/ijms19123888), 2018-12-05
Supplement: s1 [file s1]

Figure S2

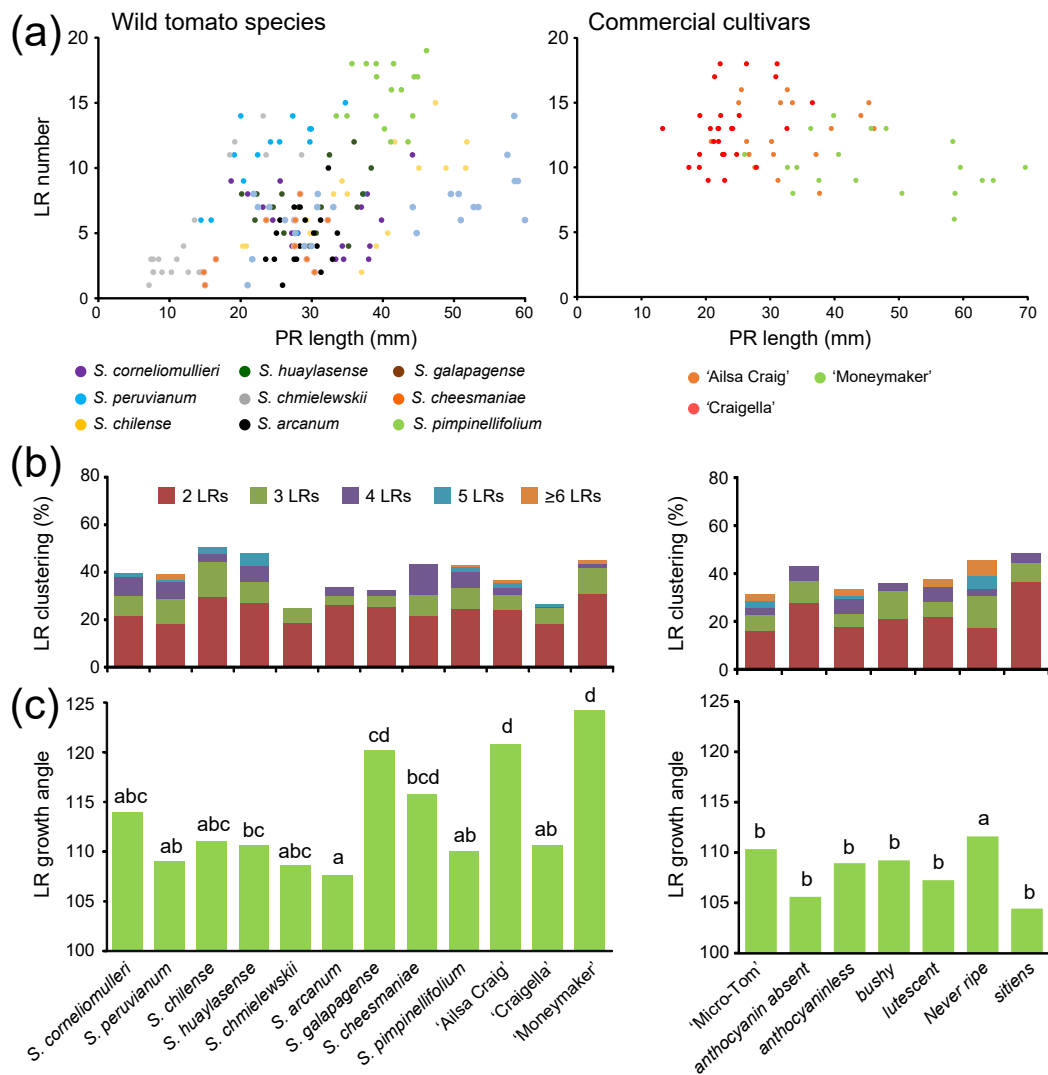

**Figure S2. Variation of some LR traits in the studied genotypes.** (a) Scatter plots of LR number according to PR length in wild tomato species and commercial tomato cultivars. (b) Percentage of consecutive LR arising on the same side of the PR. Clusters from 2 to ≥6 LR with the same growth direction are indicated. (c) Median values of the LR growth vector. Different letters indicate significant differences (LSD; p-value < 0.01) over genotypes.
