# Supplementary material for: Morphological Characterization of Root System Architecture in Diverse Tomato Genotypes during Early Growth
Source: Int J Mol Sci. 2018 Dec 5;19(12):3888. doi: 10.3390/ijms19123888 (PMC6321557; doi:10.3390/ijms19123888)
Supplement: Supplementary file 1 [file ijms-19-03888-s001.zip › Table_S3.xlsx]

## Sheet: Germination
Genotype	Germ. (0-48 h)	Ger. (48-96 h)	Germ. (0-96 h)	Non-germ. (96 h)
S. corneliomulleri	21.2	42.4	63.6	36.4	100
S. peruvianum	60	0	60	40	100
S. chilense	68.6	0	68.6	31.4	100
S. huaylasense	60	0	60	40	100
S. chmielewskii	0	60	60	40	100
S. arcanum	0	65.7	65.7	34.3	100
S. galapagense	29.2	25	54.2	45.8	100
S. cheesmaniae	0	53.8	53.8	46.2	100
S. pimpinelifollium	92	0	92	8	100
Ailsa Craig	71.8	0	71.8	28.2	100
Craigella	97.1	0	97.1	2.9	100
Moneymaker	75	0	75	25	100
M82	91.7	0	91.7	8.3	100
Micro-Tom	93.3	0	93.3	6.7	100
anthocyanin absent	42.9	28.6	71.4	28.6	100
anthocyaninless	93.3	0	93.3	6.7	100
bushy	70	23.3	93.3	6.7	100
lutescent	83.3	0	83.3	16.7	100
Never ripe	48.8	48.8	97.7	2.3	100
sitiens	60	17.5	77.5	22.5	100

## Sheet: PR length and growth rate
Genotype	Plate	Plant nº	PRL 0 das (mm)	SQRT PRL 0 das	PRL 3 das (mm)	SQRT PRL 3 das	growth speed	PRL 3-0		Genotype+das	PRL	SQRT				PRL 0 das (mm)																																	genotype
01_S. corneliomulleri	1	2	4.92	2.21811	18.67	4.32088	0.190972	13.75		01_S. corneliomulleri0	4.92	2.21811				genotype	Recuento	Promedio	Mediana	DE	CV	Mínimo	Máximo	Rango	Sesgo	Curtosis			mediana																		0 das		05_S. chielewskii
01_S. corneliomulleri	1	4	7.4	2.72029	25.57	5.05668	0.252361	18.17		01_S. corneliomulleri0	7.4	2.72029				01_S. corneliomulleri	17	10.5735	10.1	4.00274	0.378562	4.77	18.24	13.47	0.61095	-0.538092																							07_S. galapagense
01_S. corneliomulleri	1	5	10.1	3.17805	23.13	4.80937	0.180972	13.03		01_S. corneliomulleri0	10.1	3.17805				02_S. peruvianum	16	8.02313	8.305	2.66676	0.332384	3.23	12.12	8.89	-0.392854	-0.882375																							08_S. cheesmaniae
01_S. corneliomulleri	1	6	9.35	3.05778	27.21	5.21632	0.248056	17.86		01_S. corneliomulleri0	9.35	3.05778				03_S. chilense	18	12.37	13.705	6.35136	0.513449	3.6	23.8	20.2	0.306201	-1.15479																							04_S. huaylasense
01_S. corneliomulleri	1	7	4.77	2.18403	21.02	4.58476	0.225694	16.25		01_S. corneliomulleri0	4.77	2.18403				04_S. huaylasense	16	8.00063	8.05	2.82047	0.352531	3.78	15.46	11.68	1.84484	1.75732																							02_S. peruvianum
01_S. corneliomulleri	2	8	12.72	3.56651	38.02	6.16604	0.351389	25.3		01_S. corneliomulleri0	12.72	3.56651				05_S. chielewskii	14	4.46571	4.475	0.994962	0.2228	2.9	5.93	3.03	-0.267229	-0.924384																							11_"Craigella"
01_S. corneliomulleri	2	10	17.05	4.12916	44.17	6.64605	0.376667	27.12		01_S. corneliomulleri0	17.05	4.12916				06_S. arcanum	18	14.2178	14.73	2.49646	0.175587	9.39	18.81	9.42	-0.0605415	-0.438857																							10_"Ailsa Craig"
01_S. corneliomulleri	2	11	14.89	3.85876	34.3	5.85662	0.269583	19.41		01_S. corneliomulleri0	14.89	3.85876				07_S. galapagense	12	6.29333	5.87	2.54261	0.404016	2.57	11.74	9.17	1.13334	0.408034																							01_S. corneliomulleri
01_S. corneliomulleri	2	12	11.8	3.43511	28.06	5.29717	0.225833	16.26		01_S. corneliomulleri0	11.8	3.43511				08_S. cheesmaniae	11	7.93909	6.75	4.17108	0.525386	2.81	13.97	11.16	0.429591	-1.06312																							03_S. chilense
01_S. corneliomulleri	2	13	18.24	4.27083	39.82	6.31031	0.299722	21.58		01_S. corneliomulleri0	18.24	4.27083				09_S. pimpinelifollium	18	22.4506	21.625	3.83218	0.170694	17.61	30.86	13.25	1.14241	-0.339922																							06_S. arcanum
01_S. corneliomulleri	2	14	14.16	3.76298	37.8	6.14817	0.328333	23.64		01_S. corneliomulleri0	14.16	3.76298				10_"Ailsa Craig"	19	10.5626	9.95	4.76467	0.451087	4.19	17.54	13.35	0.186287	-1.37679																							13_"M82"
01_S. corneliomulleri	3	15	6.35	2.51992	24.53	4.95278	0.2525	18.18		01_S. corneliomulleri0	6.35	2.51992				11_"Craigella"	44	8.40977	7.695	3.61759	0.430165	2.74	23.2	20.46	4.27177	7.11392																							12_"Moneymaker"
01_S. corneliomulleri	3	16	9.28	3.04631	27.25	5.22015	0.249583	17.97		01_S. corneliomulleri0	9.28	3.04631				12_"Moneymaker"	7	17.8229	19.07	6.30969	0.354023	10.01	26.8	16.79	0.239141	-0.802657																							09_S. pimpinelifollium
01_S. corneliomulleri	3	17	10.82	3.28938	34.49	5.87282	0.32875	23.67		01_S. corneliomulleri0	10.82	3.28938				13_"M82"	7	15.3743	15.38	7.46988	0.485868	4.7	27.91	23.21	0.389935	0.269564
01_S. corneliomulleri	3	18	7.23	2.68887	33.38	5.77754	0.363194	26.15		01_S. corneliomulleri0	7.23	2.68887				14_"Micro-Tom"	20	11.9337	10.2411	3.50872	0.294018	7.0798	19.2311	12.1513	1.10806	-0.674497																							genotype
01_S. corneliomulleri	3	19	8.13	2.85132	36.98	6.08112	0.400694	28.85		01_S. corneliomulleri0	8.13	2.85132				15_anthocyanin absent	16	4.01466	3.58105	1.73261	0.431571	2.0233	7.5903	5.567	1.39886	-0.0911112																							19_Never ripe
01_S. corneliomulleri	3	21	12.54	3.54119	38.19	6.17981	0.35625	25.65		01_S. corneliomulleri0	12.54	3.54119				16_anthocyaninless	21	7.90101	7.4837	3.06854	0.388373	3.9756	13.6379	9.6623	1.03014	-0.91587																							15_anthocyanin absent
02_S. peruvianum	1	1	10.29	3.2078	24.21	4.92037	0.193333	13.92		01_S. corneliomulleri3	18.67	4.32088				17_bushy	18	5.52897	4.9714	2.60999	0.472056	2.0233	12.0896	10.0663	2.03069	1.27264																							17_bushy
02_S. peruvianum	1	2	6.17	2.48395	19.13	4.37379	0.18	12.96		01_S. corneliomulleri3	25.57	5.05668				18_lutescent	13	12.697	13.2321	3.83599	0.302117	5.6698	18.3559	12.6861	-0.293913	-0.544719																							20_sitiens
02_S. peruvianum	1	3	11.32	3.36452	25.5	5.04975	0.196944	14.18		01_S. corneliomulleri3	23.13	4.80937				19_Never ripe	20	3.07633	2.8471	0.916112	0.297793	1.9074	5.5558	3.6484	2.2504	1.50136																							16_anthocyaninless
02_S. peruvianum	1	4	9.03	3.005	21.81	4.67012	0.1775	12.78		01_S. corneliomulleri3	27.21	5.21632				20_sitiens	15	5.42537	5.1836	1.10843	0.204305	3.6446	7.7493	4.1047	0.576558	-0.0312818																							14_"Micro-Tom"
02_S. peruvianum	1	5	10.12	3.18119	37.3	6.10737	0.3775	27.18		01_S. corneliomulleri3	21.02	4.58476																																					18_lutescent
02_S. peruvianum	1	7	12.12	3.48138	34.73	5.89322	0.314028	22.61		01_S. corneliomulleri3	38.02	6.16604				Total	340	9.4812	7.815	5.75494	0.606984	1.9074	30.86	28.9526	8.13415	3.21821
02_S. peruvianum	2	8	6.17	2.48395	22.4	4.73286	0.225417	16.23		01_S. corneliomulleri3	44.17	6.64605
02_S. peruvianum	2	9	7.58	2.75318	29.75	5.45436	0.307917	22.17		01_S. corneliomulleri3	34.3	5.85662																																			0 y 3 das
02_S. peruvianum	2	10	9.26	3.04302	27.34	5.22877	0.251111	18.08		01_S. corneliomulleri3	28.06	5.29717
02_S. peruvianum	2	11	10.53	3.245	29.75	5.45436	0.266944	19.22		01_S. corneliomulleri3	39.82	6.31031
02_S. peruvianum	2	12	7.48	2.73496	20.03	4.47549	0.174306	12.55		01_S. corneliomulleri3	37.8	6.14817				PRL 3 das (mm)
02_S. peruvianum	2	13	9.81	3.13209	29.94	5.47175	0.279583	20.13		01_S. corneliomulleri3	24.53	4.95278				genotype	Recuento	Promedio	Mediana	DE	CV	Mínimo	Máximo	Rango	Sesgo	Curtosis
02_S. peruvianum	2	14	5.98	2.4454	20.43	4.51996	0.200694	14.45		01_S. corneliomulleri3	27.25	5.22015				01_S. corneliomulleri	17	31.3288	33.38	7.42924	0.237137	18.67	44.17	25.5	-0.14043	-0.939654
02_S. peruvianum	3	18	4.46	2.11187	15.87	3.98372	0.158472	11.41		01_S. corneliomulleri3	34.49	5.87282				02_S. peruvianum	16	25.0356	24.855	6.44109	0.257277	14.44	37.3	22.86	0.316203	-0.417606
02_S. peruvianum	3	20	4.82	2.19545	14.44	3.8	0.133611	9.62		01_S. corneliomulleri3	33.38	5.77754				03_S. chilense	18	37.1122	36.005	9.51374	0.256351	20.32	51.81	31.49	-0.120248	-0.587005
02_S. peruvianum	3	21	3.23	1.79722	27.94	5.28583	0.343194	24.71		01_S. corneliomulleri3	36.98	6.08112				04_S. huaylasense	16	29.7712	30.16	5.87728	0.197415	20.16	38.36	18.2	-0.167491	-1.03572
03_S. chilense	1	1	17.17	4.14367	51.81	7.19792	0.481111	34.64		01_S. corneliomulleri3	38.19	6.17981				05_S. chielewskii	14	10.2407	9.62	2.70775	0.26441	7.13	14.5	7.37	0.597792	-1.15912
03_S. chilense	1	2	20.17	4.4911	41.66	6.45446	0.298472	21.49		02_S. peruvianum0	10.29	3.2078				06_S. arcanum	18	28.665	28.355	2.9923	0.104389	23.54	33.6	10.06	-0.00253298	-0.885357
03_S. chilense	1	3	14.94	3.86523	39.09	6.2522	0.335417	24.15		02_S. peruvianum0	6.17	2.48395				07_S. galapagense	12	26.2733	26.905	4.0369	0.15365	20.99	33.05	12.06	0.186566	-0.912225
03_S. chilense	1	4	12.47	3.53129	33.07	5.75065	0.286111	20.6		02_S. peruvianum0	11.32	3.36452				08_S. cheesmaniae	11	24.8409	27.66	6.3979	0.257555	14.84	32.26	17.42	-1.10307	-0.683608
03_S. chilense	1	5	17.55	4.18927	34.99	5.91523	0.242222	17.44		02_S. peruvianum0	9.03	3.005				09_S. pimpinelifollium	18	40.5928	41.16	3.55711	0.0876291	33.45	46.14	12.69	-0.787089	-0.383098
03_S. chilense	1	7	15.13	3.88973	37.02	6.08441	0.304028	21.89		02_S. peruvianum0	10.12	3.18119				10_"Ailsa Craig"	19	32.4095	31.22	7.45462	0.230014	20.84	46.14	25.3	0.952882	-0.570435
03_S. chilense	2	9	7.22	2.68701	29.3	5.41295	0.306667	22.08		02_S. peruvianum0	12.12	3.48138				11_"Craigella"	44	24.2041	22.115	7.75007	0.320197	13.3	54.64	41.34	4.69646	6.0048
03_S. chilense	2	10	23.8	4.87852	48.87	6.99071	0.348194	25.07		02_S. peruvianum0	6.17	2.48395				12_"Moneymaker"	7	36.5971	36.29	6.27524	0.171468	26.03	45.67	19.64	-0.383359	0.292876
03_S. chilense	2	11	15.68	3.9598	32.25	5.67891	0.230139	16.57		02_S. peruvianum0	7.58	2.75318				13_"M82"	7	41.0757	46.26	8.9263	0.217313	28.73	49.74	21.01	-0.478865	-1.23483
03_S. chilense	2	12	8.79	2.96479	45.07	6.71342	0.503889	36.28		02_S. peruvianum0	9.26	3.04302				14_"Micro-Tom"	20	29.7454	28.7591	4.91438	0.165215	21.8512	38.5658	16.7146	0.236599	-0.876253
03_S. chilense	2	13	20.96	4.57821	51.66	7.18749	0.426389	30.7		02_S. peruvianum0	10.53	3.245				15_anthocyanin absent	16	13.0336	12.8877	1.90927	0.146489	10.2795	16.6285	6.349	0.248261	-0.727627
03_S. chilense	2	14	6.79	2.60576	47.4	6.88477	0.564028	40.61		02_S. peruvianum0	7.48	2.73496				16_anthocyaninless	21	28.711	29.2355	5.66805	0.197417	16.6894	37.6278	20.9384	-0.493907	-0.723321
03_S. chilense	3	15	5.08	2.25389	29.97	5.47449	0.345694	24.89		02_S. peruvianum0	9.81	3.13209				17_bushy	18	16.1161	15.9348	2.89238	0.179472	11.3533	21.2548	9.9015	0.337486	-0.707375
03_S. chilense	3	17	16.04	4.005	40.68	6.37809	0.342222	24.64		02_S. peruvianum0	5.98	2.4454				18_lutescent	13	26.6977	27.4197	4.40986	0.165177	19.6903	33.0407	13.3504	-0.109925	-0.976388
03_S. chilense	3	18	3.6	1.89737	34.27	5.85406	0.425972	30.67		02_S. peruvianum0	4.46	2.11187				19_Never ripe	20	23.4227	23.8893	2.16705	0.0925192	18.872	26.8072	7.9352	-1.05405	-0.14763			media
03_S. chilense	3	19	5.68	2.38328	20.8	4.5607	0.21	15.12		02_S. peruvianum0	4.82	2.19545				20_sitiens	15	18.1974	19.8023	3.89595	0.214094	11.4485	24.0996	12.6511	-0.537283	-0.80273
03_S. chilense	3	20	5.46	2.33666	20.32	4.50777	0.206389	14.86		02_S. peruvianum0	3.23	1.79722
03_S. chilense	4	24	6.13	2.47588	29.79	5.45802	0.328611	23.66		02_S. peruvianum3	24.21	4.92037				Total	340	26.6632	26.1497	9.44342	0.354174	7.13	54.64	47.51	2.30658	-0.787346
04_S. huaylasense	1	1	10.12	3.18119	37.18	6.09754	0.375833	27.06		02_S. peruvianum3	19.13	4.37379
04_S. huaylasense	1	2	7.2	2.68328	35.96	5.99667	0.399444	28.76		02_S. peruvianum3	25.5	5.04975
04_S. huaylasense	1	3	8.76	2.95973	32.5	5.70088	0.329722	23.74		02_S. peruvianum3	21.81	4.67012
04_S. huaylasense	1	4	11.45	3.38378	38.36	6.19355	0.37375	26.91		02_S. peruvianum3	37.3	6.10737				PR growth speed
04_S. huaylasense	1	6	15.46	3.93192	28.13	5.30377	0.175972	12.67		02_S. peruvianum3	34.73	5.89322				genotype	Recuento	Promedio	Mediana	DE	CV	Mínimo	Máximo	Rango	Sesgo	Curtosis
04_S. huaylasense	1	7	9.3	3.04959	36.42	6.0349	0.376667	27.12		02_S. peruvianum3	22.4	4.73286				01_S. corneliomulleri	17	0.288353	0.27	0.0674379	0.233873	0.181	0.401	0.22	0.141201	-1.01567
04_S. huaylasense	2	9	5.89	2.42693	22.02	4.69255	0.224028	16.13		02_S. peruvianum3	29.75	5.45436				02_S. peruvianum	16	0.236313	0.213	0.0719025	0.304269	0.134	0.378	0.244	0.888267	-0.619678
04_S. huaylasense	2	10	8.25	2.87228	25.82	5.08134	0.244028	17.57		02_S. peruvianum3	27.34	5.22877				03_S. chilense	18	0.343556	0.332	0.101574	0.295654	0.206	0.564	0.358	1.16637	-0.0992319
04_S. huaylasense	2	11	6.32	2.51396	35.18	5.93127	0.400833	28.86		02_S. peruvianum3	29.75	5.45436				04_S. huaylasense	16	0.302437	0.3065	0.0737934	0.243995	0.176	0.401	0.225	-0.239445	-1.16461
04_S. huaylasense	2	12	8.29	2.87924	29.69	5.44885	0.297222	21.4		02_S. peruvianum3	20.03	4.47549				05_S. chielewskii	14	0.0802143	0.0765	0.0348407	0.434345	0.021	0.138	0.117	0.192631	-0.671571
04_S. huaylasense	2	13	5.69	2.38537	31.32	5.59643	0.355972	25.63		02_S. peruvianum3	29.94	5.47175				06_S. arcanum	18	0.200556	0.193	0.0252871	0.126085	0.171	0.249	0.078	1.09455	-0.593592
04_S. huaylasense	2	14	7.85	2.80179	30.63	5.53444	0.316389	22.78		02_S. peruvianum3	20.43	4.51996				07_S. galapagense	12	0.277583	0.2845	0.0371642	0.133885	0.217	0.329	0.112	-0.438297	-0.89998
04_S. huaylasense	3	16	5.35	2.31301	22.29	4.72123	0.235278	16.94		02_S. peruvianum3	15.87	3.98372				08_S. cheesmaniae	11	0.234727	0.224	0.054787	0.233407	0.167	0.325	0.158	0.300941	-0.693549
04_S. huaylasense	3	17	3.78	1.94422	20.16	4.48999	0.2275	16.38		02_S. peruvianum3	14.44	3.8				09_S. pimpinelifollium	18	0.251944	0.2375	0.0536365	0.21289	0.174	0.353	0.179	1.09922	-0.613395
04_S. huaylasense	3	19	5.52	2.34947	26.09	5.10784	0.285694	20.57		02_S. peruvianum3	27.94	5.28583				10_"Ailsa Craig"	19	0.303421	0.284	0.068288	0.22506	0.215	0.429	0.214	0.728684	-0.805344
04_S. huaylasense	3	21	8.78	2.96311	24.59	4.95883	0.219583	15.81		03_S. chilense0	17.17	4.14367				11_"Craigella"	44	0.219318	0.2025	0.0734891	0.33508	0.107	0.437	0.33	2.76489	0.969313
05_S. chielewskii	1	2	3.96	1.98997	8.96	2.99333	0.0694444	5		03_S. chilense0	20.17	4.4911				12_"Moneymaker"	7	0.260857	0.262	0.0454768	0.174336	0.201	0.324	0.123	0.088705	-0.841174
05_S. chielewskii	1	4	5.6	2.36643	14.18	3.76563	0.119167	8.58		03_S. chilense0	14.94	3.86523				13_"M82"	7	0.357	0.39	0.0743953	0.20839	0.267	0.43	0.163	-0.307335	-1.38839
05_S. chielewskii	1	5	2.9	1.70294	7.13	2.67021	0.05875	4.23		03_S. chilense0	12.47	3.53129				14_"Micro-Tom"	20	0.2474	0.2645	0.0451633	0.182552	0.132	0.313	0.181	-2.11418	0.856366
05_S. chielewskii	1	7	4.99	2.23383	11.04	3.32265	0.0840278	6.05		03_S. chilense0	17.55	4.18927				15_anthocyanin absent	16	0.125312	0.1275	0.0266401	0.212589	0.076	0.184	0.108	0.455945	0.265603
05_S. chielewskii	2	8	5.63	2.37276	8.5	2.91548	0.0398611	2.87		03_S. chilense0	15.13	3.88973				16_anthocyaninless	21	0.289143	0.308	0.0501002	0.173271	0.161	0.343	0.182	-1.83423	0.374422
05_S. chielewskii	2	9	4.57	2.13776	14.5	3.80789	0.137917	9.93		03_S. chilense0	7.22	2.68701				17_bushy	18	0.147	0.144	0.03244	0.22068	0.106	0.204	0.098	0.699525	-1.04266
05_S. chielewskii	2	11	5.21	2.28254	13.54	3.67967	0.115694	8.33		03_S. chilense0	23.8	4.87852				18_lutescent	13	0.194462	0.192	0.0368004	0.189243	0.134	0.247	0.113	-0.110117	-1.02557
05_S. chielewskii	2	13	4.38	2.09284	7.73	2.78029	0.0465278	3.35		03_S. chilense0	15.68	3.9598				19_Never ripe	20	0.28255	0.289	0.0314467	0.111296	0.185	0.322	0.137	-3.08444	3.62932
05_S. chielewskii	2	14	5.93	2.43516	7.42	2.72397	0.0206944	1.49		03_S. chilense0	8.79	2.96479				20_sitiens	15	0.1774	0.174	0.0501067	0.282451	0.092	0.245	0.153	-0.354321	-0.93962
05_S. chielewskii	3	16	3.32	1.82209	7.73	2.78029	0.06125	4.41		03_S. chilense0	20.96	4.57821
05_S. chielewskii	3	18	3.64	1.90788	12.65	3.55668	0.125139	9.01		03_S. chilense0	6.79	2.60576				Total	340	0.238641	0.2335	0.0860753	0.360689	0.021	0.564	0.543	2.22452	0.937259
05_S. chielewskii	3	19	5.13	2.26495	11.99	3.46266	0.0952778	6.86		03_S. chilense0	5.08	2.25389
05_S. chielewskii	3	20	3.04	1.74356	7.72	2.77849	0.065	4.68		03_S. chilense0	16.04	4.005
05_S. chielewskii	3	21	4.22	2.05426	10.28	3.20624	0.0841667	6.06		03_S. chilense0	3.6	1.89737
06_S. arcanum	1	1	14.87	3.85616	27.87	5.2792	0.180556	13		03_S. chilense0	5.68	2.38328
06_S. arcanum	1	2	16.58	4.07185	29.08	5.39259	0.173611	12.5		03_S. chilense0	5.46	2.33666				genotype	Casos	Media	Grupos Homogéneos
06_S. arcanum	1	3	17.94	4.23556	30.29	5.50364	0.171528	12.35		03_S. chilense0	6.13	2.47588				05_S. chielewskii	14	0.0802143	X	a																													genotype
06_S. arcanum	1	4	14.79	3.84578	27.54	5.24786	0.177083	12.75		03_S. chilense3	51.81	7.19792				06_S. arcanum	18	0.200556	X	b																													01_S. corneliomulleri0
06_S. arcanum	1	6	15.65	3.95601	33.6	5.79655	0.249306	17.95		03_S. chilense3	41.66	6.45446				11_"Craigella"	44	0.219318	X	b																													01_S. corneliomulleri3
06_S. arcanum	1	7	18.81	4.33705	32.93	5.73847	0.196111	14.12		03_S. chilense3	39.09	6.2522				08_S. cheesmaniae	11	0.234727	XX	bc																													02_S. peruvianum0
06_S. arcanum	2	8	14.67	3.83014	28.37	5.32635	0.190278	13.7		03_S. chilense3	33.07	5.75065				02_S. peruvianum	16	0.236313	XX	bc																													02_S. peruvianum3
06_S. arcanum	2	9	15.22	3.90128	31.25	5.59017	0.222639	16.03		03_S. chilense3	34.99	5.91523				09_S. pimpinelifollium	18	0.251944	XXX	bcd									GROWTH SPEED																				03_S. chilense0
06_S. arcanum	2	10	15.93	3.99124	32.34	5.68683	0.227917	16.41		03_S. chilense3	37.02	6.08441				12_"Moneymaker"	7	0.260857	XXX	bcd									mediana																				03_S. chilense3
06_S. arcanum	2	11	11.48	3.38821	24.76	4.97594	0.184444	13.28		03_S. chilense3	29.3	5.41295				07_S. galapagense	12	0.277583	XXX	cde																													04_S. huaylasense0
06_S. arcanum	2	12	11.9	3.44964	25.54	5.05371	0.189444	13.64		03_S. chilense3	48.87	6.99071				01_S. corneliomulleri	17	0.288353	XXXX	cdef																													04_S. huaylasense3
06_S. arcanum	2	13	13.26	3.64143	28.34	5.32353	0.209444	15.08		03_S. chilense3	32.25	5.67891				04_S. huaylasense	16	0.302437	XXX	def																													05_S. chielewskii0
06_S. arcanum	2	14	16.29	4.03609	31.3	5.59464	0.208472	15.01		03_S. chilense3	45.07	6.71342				10_"Ailsa Craig"	19	0.303421	XXX	def																													05_S. chielewskii3
06_S. arcanum	3	16	13.06	3.61386	25.9	5.0892	0.178333	12.84		03_S. chilense3	51.66	7.18749				03_S. chilense	18	0.343556	X	f																													06_S. arcanum0
06_S. arcanum	3	18	11.96	3.45832	27.54	5.24786	0.216389	15.58		03_S. chilense3	47.4	6.88477				13_"M82"	7	0.357	XX	ef																													06_S. arcanum3
06_S. arcanum	3	19	11.24	3.35261	23.54	4.8518	0.170833	12.3		03_S. chilense3	29.97	5.47449																																					07_S. galapagense0
06_S. arcanum	3	20	12.88	3.58887	30.74	5.54437	0.248056	17.86		03_S. chilense3	40.68	6.37809																																					07_S. galapagense3
06_S. arcanum	3	21	9.39	3.06431	25.04	5.004	0.217361	15.65		03_S. chilense3	34.27	5.85406																																					08_S. cheesmaniae 0
07_S. galapagense	1	2	5.71	2.38956	27.57	5.25071	0.303611	21.86		03_S. chilense3	20.8	4.5607				genotype	Casos	Media	Grupos Homogéneos																														08_S. cheesmaniae 3
07_S. galapagense	1	3	4.4	2.09762	20.99	4.58148	0.230417	16.59		03_S. chilense3	20.32	4.50777				15_anthocyanin absent	16	0.125313	X	a																													09_S. pimpinelifollium0
07_S. galapagense	1	4	2.57	1.60312	26.24	5.1225	0.32875	23.67		03_S. chilense3	29.79	5.45802				17_bushy	18	0.147	XX	ab																													09_S. pimpinelifollium3
07_S. galapagense	1	5	4.66	2.1587	24.05	4.90408	0.269306	19.39		04_S. huaylasense0	10.12	3.18119				20_sitiens	15	0.1774	XX	bc																													10_"Ailsa Craig"0
07_S. galapagense	1	6	3.93	1.98242	21.86	4.67547	0.249028	17.93		04_S. huaylasense0	7.2	2.68328				18_lutescent	13	0.194462	X	c																													10_"Ailsa Craig"3
07_S. galapagense	1	7	5.33	2.30868	22.44	4.73709	0.237639	17.11		04_S. huaylasense0	8.76	2.95973				14_"Micro-Tom"	20	0.2474	X	d																													11_"Craigella"0
07_S. galapagense	2	8	8	2.82843	29.97	5.47449	0.305139	21.97		04_S. huaylasense0	11.45	3.38378				19_Never ripe	20	0.28255	X	e																													11_"Craigella"3
07_S. galapagense	2	9	7.78	2.78927	30.79	5.54887	0.319583	23.01		04_S. huaylasense0	15.46	3.93192				16_anthocyaninless	21	0.289143	X	e																													12_"Moneymaker"0
07_S. galapagense	2	10	6.03	2.45561	21.66	4.65403	0.217083	15.63		04_S. huaylasense0	9.3	3.04959																																					12_"Moneymaker"3
07_S. galapagense	2	11	9.33	3.0545	28.97	5.38238	0.272778	19.64		04_S. huaylasense0	5.89	2.42693																																					13_"M82"0
07_S. galapagense	2	12	6.04	2.45764	27.69	5.26213	0.300694	21.65		04_S. huaylasense0	8.25	2.87228																																					13_"M82"3
07_S. galapagense	2	13	11.74	3.42637	33.05	5.74891	0.295972	21.31		04_S. huaylasense0	6.32	2.51396
08_S. cheesmaniae	1	1	11.98	3.46121	27.53	5.2469	0.215972	15.55		04_S. huaylasense0	8.29	2.87924																	media																				Total
08_S. cheesmaniae	1	2	12.28	3.50428	28.38	5.32729	0.223611	16.1		04_S. huaylasense0	5.69	2.38537
08_S. cheesmaniae	1	3	6.09	2.46779	27.66	5.25928	0.299583	21.57		04_S. huaylasense0	7.85	2.80179
08_S. cheesmaniae	1	4	6.75	2.59808	27.71	5.26403	0.291111	20.96		04_S. huaylasense0	5.35	2.31301
08_S. cheesmaniae	1	5	13.97	3.73765	32.26	5.67979	0.254028	18.29		04_S. huaylasense0	3.78	1.94422
08_S. cheesmaniae	1	6	7	2.64575	30.41	5.51453	0.325139	23.41		04_S. huaylasense0	5.52	2.34947
08_S. cheesmaniae	1	7	13.24	3.63868	29.32	5.41479	0.223333	16.08		04_S. huaylasense0	8.78	2.96311
08_S. cheesmaniae	2	8	2.83	1.68226	14.84	3.85227	0.166806	12.01		04_S. huaylasense3	37.18	6.09754
08_S. cheesmaniae	2	9	4.45	2.1095	16.53	4.06571	0.167778	12.08		04_S. huaylasense3	35.96	5.99667
08_S. cheesmaniae	2	12	2.81	1.67631	15.01	3.87427	0.169444	12.2		04_S. huaylasense3	32.5	5.70088
08_S. cheesmaniae	2	14	5.93	2.43516	23.6	4.85798	0.245417	17.67		04_S. huaylasense3	38.36	6.19355
09_S. pimpinelifollium	1	2	30.86	5.55518	44.89	6.7	0.194861	14.03		04_S. huaylasense3	28.13	5.30377
09_S. pimpinelifollium	1	3	22.86	4.78121	40.24	6.3435	0.241389	17.38		04_S. huaylasense3	36.42	6.0349
09_S. pimpinelifollium	1	4	22.45	4.73814	34.96	5.9127	0.17375	12.51		04_S. huaylasense3	22.02	4.69255
09_S. pimpinelifollium	1	5	28.29	5.31883	44.2	6.64831	0.220972	15.91		04_S. huaylasense3	25.82	5.08134
09_S. pimpinelifollium	1	6	25.71	5.0705	43.54	6.59848	0.247639	17.83		04_S. huaylasense3	35.18	5.93127
09_S. pimpinelifollium	1	7	19.89	4.45982	35.66	5.9716	0.219028	15.77		04_S. huaylasense3	29.69	5.44885
09_S. pimpinelifollium	2	8	17.61	4.19643	33.45	5.7836	0.22	15.84		04_S. huaylasense3	31.32	5.59643
09_S. pimpinelifollium	2	9	24.56	4.9558	39.07	6.2506	0.201528	14.51		04_S. huaylasense3	30.63	5.53444
09_S. pimpinelifollium	2	10	20.8	4.5607	37.67	6.13759	0.234306	16.87		04_S. huaylasense3	22.29	4.72123
09_S. pimpinelifollium	2	11	18.58	4.31045	41.11	6.41171	0.312917	22.53		04_S. huaylasense3	20.16	4.48999
09_S. pimpinelifollium	2	13	25.58	5.05767	41.51	6.44283	0.22125	15.93		04_S. huaylasense3	26.09	5.10784
09_S. pimpinelifollium	2	14	26.69	5.16624	41.21	6.4195	0.201667	14.52		04_S. huaylasense3	24.59	4.95883
09_S. pimpinelifollium	3	16	17.8	4.219	39.12	6.2546	0.296111	21.32		05_S. chielewskii0	3.96	1.98997
09_S. pimpinelifollium	3	18	19.24	4.38634	39.07	6.2506	0.275417	19.83		05_S. chielewskii0	5.6	2.36643
09_S. pimpinelifollium	3	19	20.69	4.54863	46.14	6.79264	0.353472	25.45		05_S. chielewskii0	2.9	1.70294
09_S. pimpinelifollium	3	20	19.57	4.4238	44.41	6.66408	0.345	24.84		05_S. chielewskii0	4.99	2.23383
09_S. pimpinelifollium	3	21	19.36	4.4	42.61	6.52763	0.322917	23.25		05_S. chielewskii0	5.63	2.37276
09_S. pimpinelifollium	4	22	23.57	4.85489	41.81	6.46607	0.253333	18.24		05_S. chielewskii0	4.57	2.13776
10_"Ailsa Craig"	1	1	14.77	3.84318	44.1	6.64078	0.407361	29.33		05_S. chielewskii0	5.21	2.28254
10_"Ailsa Craig"	1	2	12.25	3.5	32.67	5.71577	0.283611	20.42		05_S. chielewskii0	4.38	2.09284
10_"Ailsa Craig"	1	3	15.22	3.90128	46.14	6.79264	0.429444	30.92		05_S. chielewskii0	5.93	2.43516
10_"Ailsa Craig"	1	4	14.26	3.77624	37.68	6.1384	0.325278	23.42		05_S. chielewskii0	3.32	1.82209
10_"Ailsa Craig"	1	5	17.46	4.17852	45.33	6.73276	0.387083	27.87		05_S. chielewskii0	3.64	1.90788
10_"Ailsa Craig"	2	8	16.9	4.11096	39.5	6.2849	0.313889	22.6		05_S. chielewskii0	5.13	2.26495
10_"Ailsa Craig"	2	9	14.93	3.86394	31.22	5.58749	0.22625	16.29		05_S. chielewskii0	3.04	1.74356
10_"Ailsa Craig"	2	10	17.54	4.18808	37.13	6.09344	0.272083	19.59		05_S. chielewskii0	4.22	2.05426
10_"Ailsa Craig"	2	11	8.6	2.93258	24.08	4.90714	0.215	15.48		05_S. chielewskii3	8.96	2.99333
10_"Ailsa Craig"	2	13	9.41	3.06757	25.11	5.01099	0.218056	15.7		05_S. chielewskii3	14.18	3.76563
10_"Ailsa Craig"	2	14	7.38	2.71662	31.61	5.62228	0.336528	24.23		05_S. chielewskii3	7.13	2.67021
10_"Ailsa Craig"	3	15	5.58	2.3622	30.21	5.49636	0.342083	24.63		05_S. chielewskii3	11.04	3.32265
10_"Ailsa Craig"	3	16	11.37	3.37194	30.52	5.52449	0.265972	19.15		05_S. chielewskii3	8.5	2.91548
10_"Ailsa Craig"	3	17	5.65	2.37697	25.53	5.05272	0.276111	19.88		05_S. chielewskii3	14.5	3.80789
10_"Ailsa Craig"	3	18	4.82	2.19545	20.84	4.56508	0.2225	16.02		05_S. chielewskii3	13.54	3.67967
10_"Ailsa Craig"	3	19	5.89	2.42693	26.34	5.13225	0.284028	20.45		05_S. chielewskii3	7.73	2.78029
10_"Ailsa Craig"	3	20	9.95	3.15436	26.71	5.16817	0.232778	16.76		05_S. chielewskii3	7.42	2.72397
10_"Ailsa Craig"	3	21	4.19	2.04695	33.45	5.7836	0.406389	29.26		05_S. chielewskii3	7.73	2.78029
10_"Ailsa Craig"	4	28	4.52	2.12603	27.61	5.25452	0.320694	23.09		05_S. chielewskii3	12.65	3.55668
11_"Craigella"	1	2	8.9	2.98329	31.09	5.57584	0.308194	22.19		05_S. chielewskii3	11.99	3.46266
11_"Craigella"	1	3	9.45	3.07409	35.95	5.99583	0.368056	26.5		05_S. chielewskii3	7.72	2.77849
11_"Craigella"	1	4	11.54	3.39706	21.24	4.60869	0.134722	9.7		05_S. chielewskii3	10.28	3.20624
11_"Craigella"	1	5	11.48	3.38821	36.56	6.04649	0.348333	25.08		06_S. arcanum0	14.87	3.85616
11_"Craigella"	1	6	14.23	3.77227	40.18	6.33877	0.360417	25.95		06_S. arcanum0	16.58	4.07185
11_"Craigella"	2	9	11.05	3.32415	34.78	5.89746	0.329583	23.73		06_S. arcanum0	17.94	4.23556
11_"Craigella"	2	11	23.2	4.81664	54.64	7.39189	0.436667	31.44		06_S. arcanum0	14.79	3.84578
11_"Craigella"	2	12	10.77	3.28177	30.87	5.55608	0.279167	20.1		06_S. arcanum0	15.65	3.95601
11_"Craigella"	2	13	12.28	3.50428	25.19	5.01896	0.179306	12.91		06_S. arcanum0	18.81	4.33705
11_"Craigella"	2	14	12.79	3.57631	32.61	5.71052	0.275278	19.82		06_S. arcanum0	14.67	3.83014
11_"Craigella"	3	15	4.09	2.02237	21.61	4.64866	0.243333	17.52		06_S. arcanum0	15.22	3.90128
11_"Craigella"	3	16	2.97	1.72337	18.06	4.24971	0.209583	15.09		06_S. arcanum0	15.93	3.99124
11_"Craigella"	3	17	3.44	1.85472	17.52	4.18569	0.195556	14.08		06_S. arcanum0	11.48	3.38821
11_"Craigella"	3	20	2.74	1.65529	13.3	3.64692	0.146667	10.56		06_S. arcanum0	11.9	3.44964
11_"Craigella"	4	22	7.19	2.68142	14.89	3.85876	0.106944	7.7		06_S. arcanum0	13.26	3.64143
11_"Craigella"	4	23	4.18	2.0445	16	4	0.164167	11.82		06_S. arcanum0	16.29	4.03609
11_"Craigella"	4	24	5.03	2.24277	18.09	4.25323	0.181389	13.06		06_S. arcanum0	13.06	3.61386
11_"Craigella"	4	25	5.43	2.33024	15.7	3.96232	0.142639	10.27		06_S. arcanum0	11.96	3.45832
11_"Craigella"	4	27	6.61	2.57099	17.83	4.22256	0.155833	11.22		06_S. arcanum0	11.24	3.35261
11_"Craigella"	4	28	5.55	2.35584	20.37	4.51331	0.205833	14.82		06_S. arcanum0	12.88	3.58887
11_"Craigella"	1	1	9.11302	3.01878	21.9954	4.68992	0.178922	12.8824		06_S. arcanum0	9.39	3.06431
11_"Craigella"	1	2	9.41518	3.06842	19.0672	4.3666	0.134055	9.65199		06_S. arcanum3	27.87	5.2792
11_"Craigella"	1	3	11.5582	3.39974	22.2264	4.71449	0.148169	10.6682		06_S. arcanum3	29.08	5.39259
11_"Craigella"	1	4	10.7469	3.27824	22.3024	4.72254	0.160494	11.5555		06_S. arcanum3	30.29	5.50364
11_"Craigella"	1	5	13.3413	3.65257	29.461	5.4278	0.223885	16.1197		06_S. arcanum3	27.54	5.24786
11_"Craigella"	1	6	9.5532	3.09082	19.1172	4.37232	0.132833	9.56397		06_S. arcanum3	33.6	5.79655
11_"Craigella"	2	8	7.16956	2.6776	18.9953	4.35836	0.164247	11.8258		06_S. arcanum3	32.93	5.73847
11_"Craigella"	2	9	7.59667	2.75621	22.9398	4.78955	0.213098	15.3431		06_S. arcanum3	28.37	5.32635
11_"Craigella"	2	10	8.12824	2.85101	26.3236	5.13065	0.252714	18.1954		06_S. arcanum3	31.25	5.59017
11_"Craigella"	2	11	6.7611	2.60021	17.3735	4.16815	0.147394	10.6124		06_S. arcanum3	32.34	5.68683
11_"Craigella"	2	13	8.27185	2.87608	22.6038	4.75435	0.199055	14.332		06_S. arcanum3	24.76	4.97594
11_"Craigella"	2	14	8.30729	2.88224	21.9919	4.68955	0.190063	13.6846		06_S. arcanum3	25.54	5.05371
11_"Craigella"	3	15	6.28549	2.50709	20.5179	4.52967	0.197672	14.2324		06_S. arcanum3	28.34	5.32353
11_"Craigella"	3	16	7.98649	2.82604	22.8383	4.77895	0.206276	14.8519		06_S. arcanum3	31.3	5.59464
11_"Craigella"	3	17	7.61346	2.75925	20.7094	4.55076	0.181889	13.096		06_S. arcanum3	25.9	5.0892
11_"Craigella"	3	18	6.96253	2.63866	21.894	4.6791	0.207381	14.9314		06_S. arcanum3	27.54	5.24786
11_"Craigella"	3	19	11.2523	3.35445	27.8645	5.27868	0.230724	16.6121		06_S. arcanum3	23.54	4.8518
11_"Craigella"	3	20	7.78132	2.7895	24.7947	4.97943	0.236297	17.0134		06_S. arcanum3	30.74	5.54437
11_"Craigella"	3	21	7.05019	2.65522	27.3666	5.23131	0.282172	20.3164		06_S. arcanum3	25.04	5.004
11_"Craigella"	4	22	5.68865	2.38509	19.027	4.362	0.185255	13.3384		07_S. galapagense0	5.71	2.38956
11_"Craigella"	4	24	5.7502	2.39796	29.5145	5.43272	0.33006	23.7643		07_S. galapagense0	4.4	2.09762
11_"Craigella"	4	25	7.36913	2.71461	21.3665	4.62239	0.194408	13.9974		07_S. galapagense0	2.57	1.60312
11_"Craigella"	4	26	6.71633	2.59159	24.032	4.90225	0.240496	17.3157		07_S. galapagense0	4.66	2.1587
11_"Craigella"	4	28	6.67903	2.58438	24.1827	4.91759	0.243107	17.5037		07_S. galapagense0	3.93	1.98242
12_"Moneymaker"	1	1	12.42	3.5242	34.16	5.84466	0.301944	21.74		07_S. galapagense0	5.33	2.30868
12_"Moneymaker"	1	2	12.96	3.6	36.29	6.02412	0.324028	23.33		07_S. galapagense0	8	2.82843
12_"Moneymaker"	1	3	26.8	5.17687	45.67	6.75796	0.262083	18.87		07_S. galapagense0	7.78	2.78927
12_"Moneymaker"	1	5	19.07	4.36692	33.54	5.79137	0.200972	14.47		07_S. galapagense0	6.03	2.45561
12_"Moneymaker"	1	6	19.3	4.39318	39.86	6.31348	0.285556	20.56		07_S. galapagense0	9.33	3.0545
12_"Moneymaker"	1	7	24.2	4.91935	40.63	6.37417	0.228194	16.43		07_S. galapagense0	6.04	2.45764
12_"Moneymaker"	2	9	10.01	3.16386	26.03	5.10196	0.2225	16.02		07_S. galapagense0	11.74	3.42637
13_"M82"	1	1	15.38	3.92173	46.26	6.80147	0.428889	30.88		07_S. galapagense3	27.57	5.25071
13_"M82"	1	2	13.11	3.62077	33.71	5.80603	0.286111	20.6		07_S. galapagense3	20.99	4.58148
13_"M82"	1	3	20.02	4.47437	49.74	7.05266	0.412778	29.72		07_S. galapagense3	26.24	5.1225
13_"M82"	1	4	27.91	5.28299	48.38	6.95557	0.284306	20.47		07_S. galapagense3	24.05	4.90408
13_"M82"	1	5	16.99	4.12189	47.94	6.92387	0.429861	30.95		07_S. galapagense3	21.86	4.67547
13_"M82"	2	9	4.7	2.16795	32.77	5.72451	0.389861	28.07		07_S. galapagense3	22.44	4.73709
13_"M82"	2	11	9.51	3.08383	28.73	5.36004	0.266944	19.22		07_S. galapagense3	29.97	5.47449
										07_S. galapagense3	30.79	5.54887
										07_S. galapagense3	21.66	4.65403
14_"Micro-Tom"	1	1	15.2218	3.90151	33.8464	5.81777	0.258675	18.6246		07_S. galapagense3	28.97	5.38238
14_"Micro-Tom"	1	2	12.5197	3.53831	27.9097	5.28296	0.213751	15.3901		07_S. galapagense3	27.69	5.26213
14_"Micro-Tom"	1	3	13.262	3.64171	34.7529	5.89516	0.298484	21.4909		07_S. galapagense3	33.05	5.74891
14_"Micro-Tom"	1	4	17.9801	4.24029	37.2575	6.10389	0.267742	19.2774		08_S. cheesmaniae 0	11.98	3.46121
14_"Micro-Tom"	1	5	15.536	3.94157	34.7662	5.89629	0.267087	19.2302		08_S. cheesmaniae 0	12.28	3.50428
14_"Micro-Tom"	1	7	19.2311	4.38533	38.5658	6.21014	0.268538	19.3347		08_S. cheesmaniae 0	6.09	2.46779
14_"Micro-Tom"	2	8	10.3785	3.22157	27.8957	5.28164	0.243294	17.5172		08_S. cheesmaniae 0	6.75	2.59808
14_"Micro-Tom"	2	9	13.924	3.73149	32.97	5.74195	0.264528	19.046		08_S. cheesmaniae 0	13.97	3.73765
14_"Micro-Tom"	2	10	8.94982	2.99162	28.7042	5.35763	0.274366	19.7544		08_S. cheesmaniae 0	7	2.64575
14_"Micro-Tom"	2	11	9.80628	3.1315	32.3666	5.68917	0.313338	22.5603		08_S. cheesmaniae 0	13.24	3.63868
14_"Micro-Tom"	2	12	9.60806	3.09969	27.321	5.22695	0.246013	17.7129		08_S. cheesmaniae 0	2.83	1.68226
14_"Micro-Tom"	2	13	8.81331	2.96872	28.8806	5.37407	0.278712	20.0673		08_S. cheesmaniae 0	4.45	2.1095
14_"Micro-Tom"	2	14	14.8085	3.84819	34.8173	5.90062	0.2779	20.0088		08_S. cheesmaniae 0	2.81	1.67631
14_"Micro-Tom"	3	15	10.1036	3.17862	23.1371	4.8101	0.181021	13.0335		08_S. cheesmaniae 0	5.93	2.43516
14_"Micro-Tom"	3	17	15.4051	3.92493	24.9298	4.99298	0.132288	9.52474		08_S. cheesmaniae 3	27.53	5.2469
14_"Micro-Tom"	3	18	8.50102	2.91565	27.4876	5.24286	0.263703	18.9866		08_S. cheesmaniae 3	28.38	5.32729
14_"Micro-Tom"	3	19	9.76701	3.12522	28.8141	5.36788	0.264543	19.0471		08_S. cheesmaniae 3	27.66	5.25928
14_"Micro-Tom"	3	20	9.59871	3.09818	22.589	4.75279	0.180421	12.9903		08_S. cheesmaniae 3	27.71	5.26403
14_"Micro-Tom"	3	21	7.07982	2.66079	26.0456	5.10349	0.263414	18.9658		08_S. cheesmaniae 3	32.26	5.67979
14_"Micro-Tom"	4	27	8.17938	2.85996	21.8512	4.67453	0.189886	13.6718		08_S. cheesmaniae 3	30.41	5.51453
15_anthocyanin absent	1	1	3.91952	1.97978	11.4926	3.39007	0.105182	7.57308		08_S. cheesmaniae 3	29.32	5.41479
15_anthocyanin absent	1	2	7.11348	2.66711	12.6063	3.55054	0.0762892	5.49282		08_S. cheesmaniae 3	14.84	3.85227
15_anthocyanin absent	1	4	4.75541	2.18069	12.1352	3.48356	0.102497	7.37979		08_S. cheesmaniae 3	16.53	4.06571
15_anthocyanin absent	1	5	7.59033	2.75506	16.6285	4.07781	0.12553	9.03817		08_S. cheesmaniae 3	15.01	3.87427
15_anthocyanin absent	1	6	6.15417	2.48076	14.567	3.81667	0.116845	8.41283		08_S. cheesmaniae 3	23.6	4.85798
15_anthocyanin absent	1	7	4.45995	2.11186	14.385	3.79276	0.137848	9.92505		09_S. pimpinelifollium0	30.86	5.55518
15_anthocyanin absent	2	8	4.68435	2.16434	14.4802	3.80529	0.136053	9.79585		09_S. pimpinelifollium0	22.86	4.78121
15_anthocyanin absent	2	11	2.84053	1.68539	10.6708	3.26662	0.108754	7.83027		09_S. pimpinelifollium0	22.45	4.73814
15_anthocyanin absent	2	12	4.39076	2.09541	14.9548	3.86714	0.146723	10.564		09_S. pimpinelifollium0	28.29	5.31883
15_anthocyanin absent	2	13	2.24213	1.49737	12.215	3.495	0.138512	9.97287		09_S. pimpinelifollium0	25.71	5.0705
15_anthocyanin absent	2	14	3.24258	1.80072	13.51	3.6756	0.142603	10.2674		09_S. pimpinelifollium0	19.89	4.45982
15_anthocyanin absent	3	15	2.09253	1.44656	15.3489	3.91777	0.184116	13.2564		09_S. pimpinelifollium0	17.61	4.19643
15_anthocyanin absent	3	16	3.22014	1.79447	10.3075	3.21053	0.0984356	7.08736		09_S. pimpinelifollium0	24.56	4.9558
15_anthocyanin absent	3	17	3.00135	1.73244	10.2795	3.20617	0.101085	7.27815		09_S. pimpinelifollium0	20.8	4.5607
15_anthocyanin absent	3	18	2.50393	1.58238	11.7866	3.43316	0.128926	9.28267		09_S. pimpinelifollium0	18.58	4.31045
15_anthocyanin absent	3	20	2.02334	1.42244	13.1691	3.62893	0.154802	11.1458		09_S. pimpinelifollium0	25.58	5.05767
16_anthocyaninless	1	1	10.4514	3.23287	34.0284	5.83339	0.327458	23.577		09_S. pimpinelifollium0	26.69	5.16624
16_anthocyaninless	1	2	8.27288	2.87626	32.1657	5.67148	0.331845	23.8928		09_S. pimpinelifollium0	17.8	4.219
16_anthocyaninless	1	3	11.4631	3.38572	35.0077	5.91673	0.327008	23.5446		09_S. pimpinelifollium0	19.24	4.38634
16_anthocyaninless	1	4	13.2733	3.64325	37.6278	6.13415	0.338257	24.3545		09_S. pimpinelifollium0	20.69	4.54863
16_anthocyaninless	1	5	12.1419	3.48452	34.2923	5.85596	0.307644	22.1504		09_S. pimpinelifollium0	19.57	4.4238
16_anthocyaninless	1	7	13.6379	3.69295	36.2033	6.01692	0.313408	22.5654		09_S. pimpinelifollium0	19.36	4.4
16_anthocyaninless	2	8	4.52914	2.12818	29.2355	5.40699	0.343144	24.7064		09_S. pimpinelifollium0	23.57	4.85489
16_anthocyaninless	2	9	6.25702	2.5014	23.7223	4.87055	0.242573	17.4653		09_S. pimpinelifollium3	44.89	6.7
16_anthocyaninless	2	10	7.54919	2.74758	29.5582	5.43675	0.305681	22.009		09_S. pimpinelifollium3	40.24	6.3435
16_anthocyaninless	2	11	9.74831	3.12223	34.4092	5.86594	0.342512	24.6609		09_S. pimpinelifollium3	34.96	5.9127
16_anthocyaninless	2	12	11.1134	3.33368	32.018	5.65845	0.290342	20.9046		09_S. pimpinelifollium3	44.2	6.64831
16_anthocyaninless	2	13	7.48374	2.73564	27.5394	5.2478	0.278551	20.0557		09_S. pimpinelifollium3	43.54	6.59848
16_anthocyaninless	2	14	7.13031	2.67026	31.6708	5.62768	0.34084	24.5405		09_S. pimpinelifollium3	35.66	5.9716
16_anthocyaninless	3	15	5.11819	2.26234	16.6894	4.08527	0.160711	11.5712		09_S. pimpinelifollium3	33.45	5.7836
16_anthocyaninless	3	16	4.95737	2.22652	22.6429	4.75846	0.245632	17.6855		09_S. pimpinelifollium3	39.07	6.2506
16_anthocyaninless	3	17	5.87928	2.42472	25.2672	5.02665	0.269277	19.3879		09_S. pimpinelifollium3	37.67	6.13759
16_anthocyaninless	3	18	7.66513	2.7686	23.3359	4.83072	0.21765	15.6708		09_S. pimpinelifollium3	41.11	6.41171
16_anthocyaninless	3	19	4.32344	2.07929	26.8373	5.18047	0.312693	22.5139		09_S. pimpinelifollium3	41.51	6.44283
16_anthocyaninless	3	20	5.42674	2.32954	22.8438	4.77952	0.241904	17.4171		09_S. pimpinelifollium3	41.21	6.4195
16_anthocyaninless	3	21	3.97562	1.9939	26.2094	5.11951	0.308802	22.2338		09_S. pimpinelifollium3	39.12	6.2546
16_anthocyaninless	4	27	5.52398	2.35031	21.6272	4.65051	0.223656	16.1032		09_S. pimpinelifollium3	39.07	6.2506
17_bushy	1	1	6.60297	2.56962	14.2366	3.77314	0.106023	7.63363		09_S. pimpinelifollium3	46.14	6.79264
17_bushy	1	2	7.56228	2.74996	15.6513	3.95617	0.112348	8.08902		09_S. pimpinelifollium3	44.41	6.66408
17_bushy	1	3	10.5131	3.2424	19.0127	4.36036	0.118049	8.49956		09_S. pimpinelifollium3	42.61	6.52763
17_bushy	1	4	6.53565	2.55649	21.2548	4.61029	0.204433	14.7191		09_S. pimpinelifollium3	41.81	6.46607
17_bushy	1	5	5.01721	2.23991	16.3303	4.04108	0.157126	11.3131		10_"Ailsa Craig"0	14.77	3.84318
17_bushy	1	6	4.92558	2.21936	18.0383	4.24715	0.182121	13.1127		10_"Ailsa Craig"0	12.25	3.5
17_bushy	1	7	12.0896	3.477	19.8359	4.45375	0.107588	7.74635		10_"Ailsa Craig"0	15.22	3.90128
17_bushy	2	8	4.68809	2.1652	16.4388	4.05448	0.163204	11.7507		10_"Ailsa Craig"0	14.26	3.77624
17_bushy	2	9	5.32015	2.30655	15.7122	3.96386	0.144334	10.392		10_"Ailsa Craig"0	17.46	4.17852
17_bushy	2	10	3.80919	1.95171	13.4435	3.66654	0.13381	9.63431		10_"Ailsa Craig"0	16.9	4.11096
17_bushy	2	11	5.64553	2.37603	16.1574	4.01963	0.145998	10.5119		10_"Ailsa Craig"0	14.93	3.86394
17_bushy	2	12	3.35478	1.83161	13.7102	3.70273	0.143825	10.3554		10_"Ailsa Craig"0	17.54	4.18808
17_bushy	2	14	4.27295	2.06711	12.859	3.58594	0.119251	8.58605		10_"Ailsa Craig"0	8.6	2.93258
17_bushy	3	16	3.96253	1.99061	12.2136	3.4948	0.114598	8.25107		10_"Ailsa Craig"0	9.41	3.06757
17_bushy	3	17	3.8522	1.9627	18.0677	4.25061	0.197437	14.2155		10_"Ailsa Craig"0	7.38	2.71662
17_bushy	3	18	2.02334	1.42244	15.2138	3.90049	0.183201	13.1905		10_"Ailsa Craig"0	5.58	2.3622
17_bushy	3	20	2.22904	1.493	11.3533	3.36947	0.126726	9.12426		10_"Ailsa Craig"0	11.37	3.37194
17_bushy	3	21	7.11722	2.66781	20.5604	4.53436	0.186711	13.4432		10_"Ailsa Craig"0	5.65	2.37697
18_lutescent	1	1	12.1961	3.4923	29.3972	5.42192	0.238904	17.2011		10_"Ailsa Craig"0	4.82	2.19545
18_lutescent	1	2	13.2321	3.6376	29.3867	5.42095	0.224369	16.1546		10_"Ailsa Craig"0	5.89	2.42693
18_lutescent	1	3	18.3559	4.28438	28.0322	5.29454	0.134393	9.67628		10_"Ailsa Craig"0	9.95	3.15436
18_lutescent	1	4	14.1073	3.75597	26.3599	5.13419	0.170175	12.2526		10_"Ailsa Craig"0	4.19	2.04695
18_lutescent	1	6	16.9291	4.1145	33.0407	5.7481	0.223772	16.1116		10_"Ailsa Craig"0	4.52	2.12603
18_lutescent	1	7	13.4341	3.66525	31.2242	5.58786	0.247085	17.7901		10_"Ailsa Craig"3	44.1	6.64078
18_lutescent	2	9	10.7338	3.27625	21.7336	4.66193	0.152775	10.9998		10_"Ailsa Craig"3	32.67	5.71577
18_lutescent	2	10	8.15881	2.85636	19.6903	4.43738	0.16016	11.5315		10_"Ailsa Craig"3	46.14	6.79264
18_lutescent	2	13	15.4799	3.93445	27.4197	5.23638	0.165831	11.9398		10_"Ailsa Craig"3	37.68	6.1384
18_lutescent	2	14	17.4995	4.18324	32.5724	5.70722	0.209346	15.0729		10_"Ailsa Craig"3	45.33	6.73276
18_lutescent	3	17	9.35748	3.059	23.1721	4.81374	0.19187	13.8146		10_"Ailsa Craig"3	39.5	6.2849
18_lutescent	3	18	5.66984	2.38114	22.2726	4.71939	0.230594	16.6028		10_"Ailsa Craig"3	31.22	5.58749
18_lutescent	3	19	9.90726	3.14758	22.7689	4.77168	0.178634	12.8616		10_"Ailsa Craig"3	37.13	6.09344
19_Never ripe	1	1	5.55577	2.35707	18.872	4.34419	0.184948	13.3162		10_"Ailsa Craig"3	24.08	4.90714
19_Never ripe	1	2	3.0294	1.74052	23.7524	4.87364	0.287819	20.723		10_"Ailsa Craig"3	25.11	5.01099
19_Never ripe	1	4	3.10233	1.76134	23.9904	4.898	0.290112	20.8881		10_"Ailsa Craig"3	31.61	5.62228
19_Never ripe	1	5	3.60349	1.89829	26.8072	5.17757	0.322274	23.2037		10_"Ailsa Craig"3	30.21	5.49636
19_Never ripe	1	6	4.15701	2.03887	25.7131	5.07081	0.29939	21.5561		10_"Ailsa Craig"3	30.52	5.52449
19_Never ripe	1	7	4.66004	2.15871	23.7881	4.8773	0.265667	19.1281		10_"Ailsa Craig"3	25.53	5.05272
19_Never ripe	2	8	2.48897	1.57765	19.3627	4.40031	0.234357	16.8737		10_"Ailsa Craig"3	20.84	4.56508
19_Never ripe	2	9	2.25335	1.50112	24.8759	4.98757	0.314202	22.6225		10_"Ailsa Craig"3	26.34	5.13225
19_Never ripe	2	10	2.88167	1.69755	22.4273	4.73575	0.271467	19.5456		10_"Ailsa Craig"3	26.71	5.16817
19_Never ripe	2	11	2.65727	1.63011	24.5238	4.95215	0.303702	21.8665		10_"Ailsa Craig"3	33.45	5.7836
19_Never ripe	2	12	2.22904	1.493	20.9433	4.57639	0.25992	18.7143		10_"Ailsa Craig"3	27.61	5.25452
19_Never ripe	2	13	3.74374	1.93487	26.3445	5.13269	0.313899	22.6008		11_"Craigella"0	8.9	2.98329
19_Never ripe	2	14	2.81248	1.67705	23.5284	4.85061	0.287721	20.7159		11_"Craigella"0	9.45	3.07409
19_Never ripe	3	15	3.48942	1.868	25.6207	5.06169	0.307379	22.1313		11_"Craigella"0	11.54	3.39706
19_Never ripe	3	16	1.93919	1.39255	21.6272	4.65051	0.273445	19.688		11_"Craigella"0	11.48	3.38821
19_Never ripe	3	17	2.76199	1.66192	24.1871	4.91804	0.297571	21.4251		11_"Craigella"0	14.23	3.77227
19_Never ripe	3	18	1.9074	1.38109	21.4214	4.62833	0.271028	19.514		11_"Craigella"0	11.05	3.32415
19_Never ripe	3	19	2.52263	1.58828	22.1438	4.70572	0.272516	19.6212		11_"Craigella"0	23.2	4.81664
19_Never ripe	3	20	2.70963	1.6461	24.4461	4.9443	0.301895	21.7365		11_"Craigella"0	10.77	3.28177
19_Never ripe	3	21	3.02192	1.73837	24.0786	4.907	0.292454	21.0567		11_"Craigella"0	12.28	3.50428
20_sitiens	1	2	5.91481	2.43204	18.4744	4.29819	0.174439	12.5596		11_"Craigella"0	12.79	3.57631
20_sitiens	1	3	7.74928	2.78375	19.8023	4.44998	0.167403	12.053		11_"Craigella"0	4.09	2.02237
20_sitiens	1	4	6.41223	2.53224	19.9395	4.46537	0.187879	13.5273		11_"Craigella"0	2.97	1.72337
20_sitiens	1	5	3.64463	1.90909	20.4379	4.52083	0.23324	16.7933		11_"Craigella"0	3.44	1.85472
20_sitiens	1	6	5.70911	2.38937	21.9674	4.68694	0.22581	16.2583		11_"Craigella"0	2.74	1.65529
20_sitiens	1	7	4.92745	2.21979	14.4809	3.80538	0.132687	9.55345		11_"Craigella"0	7.19	2.68142
20_sitiens	2	8	3.99806	1.99951	15.253	3.90551	0.156319	11.2549		11_"Craigella"0	4.18	2.0445
20_sitiens	2	10	5.07518	2.25282	20.2622	4.50136	0.210931	15.187		11_"Craigella"0	5.03	2.24277
20_sitiens	2	11	6.74883	2.59785	24.0996	4.90913	0.240983	17.3508		11_"Craigella"0	5.43	2.33024
20_sitiens	2	12	4.16636	2.04117	12.2402	3.4986	0.112137	8.07384		11_"Craigella"0	6.61	2.57099
20_sitiens	2	13	4.85265	2.20287	11.4485	3.38356	0.091609	6.59585		11_"Craigella"0	5.55	2.35584
20_sitiens	2	14	5.18364	2.27676	22.8424	4.77937	0.245261	17.6588		11_"Craigella"0	9.11302	3.01878
20_sitiens	3	16	6.43841	2.5374	14.553	3.81484	0.112703	8.11459		11_"Craigella"0	9.41518	3.06842
20_sitiens	3	19	5.01908	2.24033	16.3653	4.0454	0.157586	11.3462		11_"Craigella"0	11.5582	3.39974
20_sitiens	3	21	5.54081	2.35389	20.7949	4.56014	0.211862	15.2541		11_"Craigella"0	10.7469	3.27824
										11_"Craigella"0	13.3413	3.65257
										11_"Craigella"0	9.5532	3.09082
										11_"Craigella"0	7.16956	2.6776
										11_"Craigella"0	7.59667	2.75621
										11_"Craigella"0	8.12824	2.85101
										11_"Craigella"0	6.7611	2.60021
										11_"Craigella"0	8.27185	2.87608
										11_"Craigella"0	8.30729	2.88224
										11_"Craigella"0	6.28549	2.50709
										11_"Craigella"0	7.98649	2.82604
										11_"Craigella"0	7.61346	2.75925
										11_"Craigella"0	6.96253	2.63866
										11_"Craigella"0	11.2523	3.35445
										11_"Craigella"0	7.78132	2.7895
										11_"Craigella"0	7.05019	2.65522
										11_"Craigella"0	5.68865	2.38509
										11_"Craigella"0	5.7502	2.39796
										11_"Craigella"0	7.36913	2.71461
										11_"Craigella"0	6.71633	2.59159
										11_"Craigella"0	6.67903	2.58438
										11_"Craigella"3	31.09	5.57584
										11_"Craigella"3	35.95	5.99583
										11_"Craigella"3	21.24	4.60869
										11_"Craigella"3	36.56	6.04649
										11_"Craigella"3	40.18	6.33877
										11_"Craigella"3	34.78	5.89746
										11_"Craigella"3	54.64	7.39189
										11_"Craigella"3	30.87	5.55608
										11_"Craigella"3	25.19	5.01896
										11_"Craigella"3	32.61	5.71052
										11_"Craigella"3	21.61	4.64866
										11_"Craigella"3	18.06	4.24971
										11_"Craigella"3	17.52	4.18569
										11_"Craigella"3	13.3	3.64692
										11_"Craigella"3	14.89	3.85876
										11_"Craigella"3	16	4
										11_"Craigella"3	18.09	4.25323
										11_"Craigella"3	15.7	3.96232
										11_"Craigella"3	17.83	4.22256
										11_"Craigella"3	20.37	4.51331
										11_"Craigella"3	21.9954	4.68992
										11_"Craigella"3	19.0672	4.3666
										11_"Craigella"3	22.2264	4.71449
										11_"Craigella"3	22.3024	4.72254
										11_"Craigella"3	29.461	5.4278
										11_"Craigella"3	19.1172	4.37232
										11_"Craigella"3	18.9953	4.35836
										11_"Craigella"3	22.9398	4.78955
										11_"Craigella"3	26.3236	5.13065
										11_"Craigella"3	17.3735	4.16815
										11_"Craigella"3	22.6038	4.75435
										11_"Craigella"3	21.9919	4.68955
										11_"Craigella"3	20.5179	4.52967
										11_"Craigella"3	22.8383	4.77895
										11_"Craigella"3	20.7094	4.55076
										11_"Craigella"3	21.894	4.6791
										11_"Craigella"3	27.8645	5.27868
										11_"Craigella"3	24.7947	4.97943
										11_"Craigella"3	27.3666	5.23131
										11_"Craigella"3	19.027	4.362
										11_"Craigella"3	29.5145	5.43272
										11_"Craigella"3	21.3665	4.62239
										11_"Craigella"3	24.032	4.90225
										11_"Craigella"3	24.1827	4.91759
										12_"Moneymaker"0	12.42	3.5242
										12_"Moneymaker"0	12.96	3.6
										12_"Moneymaker"0	26.8	5.17687
										12_"Moneymaker"0	19.07	4.36692
										12_"Moneymaker"0	19.3	4.39318
										12_"Moneymaker"0	24.2	4.91935
										12_"Moneymaker"0	10.01	3.16386
										12_"Moneymaker"3	34.16	5.84466
										12_"Moneymaker"3	36.29	6.02412
										12_"Moneymaker"3	45.67	6.75796
										12_"Moneymaker"3	33.54	5.79137
										12_"Moneymaker"3	39.86	6.31348
										12_"Moneymaker"3	40.63	6.37417
										12_"Moneymaker"3	26.03	5.10196
										13_"M82"0	15.38	3.92173
										13_"M82"0	13.11	3.62077
										13_"M82"0	20.02	4.47437
										13_"M82"0	27.91	5.28299
										13_"M82"0	16.99	4.12189
										13_"M82"0	4.7	2.16795
										13_"M82"0	9.51	3.08383
										13_"M82"3	46.26	6.80147
										13_"M82"3	33.71	5.80603
										13_"M82"3	49.74	7.05266
										13_"M82"3	48.38	6.95557
										13_"M82"3	47.94	6.92387
										13_"M82"3	32.77	5.72451
										13_"M82"3	28.73	5.36004
										14_"Micro-Tom"0	15.2218	3.90151
										14_"Micro-Tom"0	12.5197	3.53831
										14_"Micro-Tom"0	13.262	3.64171
										14_"Micro-Tom"0	17.9801	4.24029
										14_"Micro-Tom"0	15.536	3.94157
										14_"Micro-Tom"0	19.2311	4.38533
										14_"Micro-Tom"0	10.3785	3.22157
										14_"Micro-Tom"0	13.924	3.73149
										14_"Micro-Tom"0	8.94982	2.99162
										14_"Micro-Tom"0	9.80628	3.1315
										14_"Micro-Tom"0	9.60806	3.09969
										14_"Micro-Tom"0	8.81331	2.96872
										14_"Micro-Tom"0	14.8085	3.84819
										14_"Micro-Tom"0	10.1036	3.17862
										14_"Micro-Tom"0	15.4051	3.92493
										14_"Micro-Tom"0	8.50102	2.91565
										14_"Micro-Tom"0	9.76701	3.12522
										14_"Micro-Tom"0	9.59871	3.09818
										14_"Micro-Tom"0	7.07982	2.66079
										14_"Micro-Tom"0	8.17938	2.85996
										14_"Micro-Tom"3	33.8464	5.81777
										14_"Micro-Tom"3	27.9097	5.28296
										14_"Micro-Tom"3	34.7529	5.89516
										14_"Micro-Tom"3	37.2575	6.10389
										14_"Micro-Tom"3	34.7662	5.89629
										14_"Micro-Tom"3	38.5658	6.21014
										14_"Micro-Tom"3	27.8957	5.28164
										14_"Micro-Tom"3	32.97	5.74195
										14_"Micro-Tom"3	28.7042	5.35763
										14_"Micro-Tom"3	32.3666	5.68917
										14_"Micro-Tom"3	27.321	5.22695
										14_"Micro-Tom"3	28.8806	5.37407
										14_"Micro-Tom"3	34.8173	5.90062
										14_"Micro-Tom"3	23.1371	4.8101
										14_"Micro-Tom"3	24.9298	4.99298
										14_"Micro-Tom"3	27.4876	5.24286
										14_"Micro-Tom"3	28.8141	5.36788
										14_"Micro-Tom"3	22.589	4.75279
										14_"Micro-Tom"3	26.0456	5.10349
										14_"Micro-Tom"3	21.8512	4.67453
										15_anthocyanin absent0	3.91952	1.97978
										15_anthocyanin absent0	7.11348	2.66711
										15_anthocyanin absent0	4.75541	2.18069
										15_anthocyanin absent0	7.59033	2.75506
										15_anthocyanin absent0	6.15417	2.48076
										15_anthocyanin absent0	4.45995	2.11186
										15_anthocyanin absent0	4.68435	2.16434
										15_anthocyanin absent0	2.84053	1.68539
										15_anthocyanin absent0	4.39076	2.09541
										15_anthocyanin absent0	2.24213	1.49737
										15_anthocyanin absent0	3.24258	1.80072
										15_anthocyanin absent0	2.09253	1.44656
										15_anthocyanin absent0	3.22014	1.79447
										15_anthocyanin absent0	3.00135	1.73244
										15_anthocyanin absent0	2.50393	1.58238
										15_anthocyanin absent0	2.02334	1.42244
										15_anthocyanin absent3	11.4926	3.39007
										15_anthocyanin absent3	12.6063	3.55054
										15_anthocyanin absent3	12.1352	3.48356
										15_anthocyanin absent3	16.6285	4.07781
										15_anthocyanin absent3	14.567	3.81667
										15_anthocyanin absent3	14.385	3.79276
										15_anthocyanin absent3	14.4802	3.80529
										15_anthocyanin absent3	10.6708	3.26662
										15_anthocyanin absent3	14.9548	3.86714
										15_anthocyanin absent3	12.215	3.495
										15_anthocyanin absent3	13.51	3.6756
										15_anthocyanin absent3	15.3489	3.91777
										15_anthocyanin absent3	10.3075	3.21053
										15_anthocyanin absent3	10.2795	3.20617
										15_anthocyanin absent3	11.7866	3.43316
										15_anthocyanin absent3	13.1691	3.62893
										16_anthocyaninless0	10.4514	3.23287
										16_anthocyaninless0	8.27288	2.87626
										16_anthocyaninless0	11.4631	3.38572
										16_anthocyaninless0	13.2733	3.64325
										16_anthocyaninless0	12.1419	3.48452
										16_anthocyaninless0	13.6379	3.69295
										16_anthocyaninless0	4.52914	2.12818
										16_anthocyaninless0	6.25702	2.5014
										16_anthocyaninless0	7.54919	2.74758
										16_anthocyaninless0	9.74831	3.12223
										16_anthocyaninless0	11.1134	3.33368
										16_anthocyaninless0	7.48374	2.73564
										16_anthocyaninless0	7.13031	2.67026
										16_anthocyaninless0	5.11819	2.26234
										16_anthocyaninless0	4.95737	2.22652
										16_anthocyaninless0	5.87928	2.42472
										16_anthocyaninless0	7.66513	2.7686
										16_anthocyaninless0	4.32344	2.07929
										16_anthocyaninless0	5.42674	2.32954
										16_anthocyaninless0	3.97562	1.9939
										16_anthocyaninless0	5.52398	2.35031
										16_anthocyaninless3	34.0284	5.83339
										16_anthocyaninless3	32.1657	5.67148
										16_anthocyaninless3	35.0077	5.91673
										16_anthocyaninless3	37.6278	6.13415
										16_anthocyaninless3	34.2923	5.85596
										16_anthocyaninless3	36.2033	6.01692
										16_anthocyaninless3	29.2355	5.40699
										16_anthocyaninless3	23.7223	4.87055
										16_anthocyaninless3	29.5582	5.43675
										16_anthocyaninless3	34.4092	5.86594
										16_anthocyaninless3	32.018	5.65845
										16_anthocyaninless3	27.5394	5.2478
										16_anthocyaninless3	31.6708	5.62768
										16_anthocyaninless3	16.6894	4.08527
										16_anthocyaninless3	22.6429	4.75846
										16_anthocyaninless3	25.2672	5.02665
										16_anthocyaninless3	23.3359	4.83072
										16_anthocyaninless3	26.8373	5.18047
										16_anthocyaninless3	22.8438	4.77952
										16_anthocyaninless3	26.2094	5.11951
										16_anthocyaninless3	21.6272	4.65051
										17_bushy0	6.60297	2.56962
										17_bushy0	7.56228	2.74996
										17_bushy0	10.5131	3.2424
										17_bushy0	6.53565	2.55649
										17_bushy0	5.01721	2.23991
										17_bushy0	4.92558	2.21936
										17_bushy0	12.0896	3.477
										17_bushy0	4.68809	2.1652
										17_bushy0	5.32015	2.30655
										17_bushy0	3.80919	1.95171
										17_bushy0	5.64553	2.37603
										17_bushy0	3.35478	1.83161
										17_bushy0	4.27295	2.06711
										17_bushy0	3.96253	1.99061
										17_bushy0	3.8522	1.9627
										17_bushy0	2.02334	1.42244
										17_bushy0	2.22904	1.493
										17_bushy0	7.11722	2.66781
										17_bushy3	14.2366	3.77314
										17_bushy3	15.6513	3.95617
										17_bushy3	19.0127	4.36036
										17_bushy3	21.2548	4.61029
										17_bushy3	16.3303	4.04108
										17_bushy3	18.0383	4.24715
										17_bushy3	19.8359	4.45375
										17_bushy3	16.4388	4.05448
										17_bushy3	15.7122	3.96386
										17_bushy3	13.4435	3.66654
										17_bushy3	16.1574	4.01963
										17_bushy3	13.7102	3.70273
										17_bushy3	12.859	3.58594
										17_bushy3	12.2136	3.4948
										17_bushy3	18.0677	4.25061
										17_bushy3	15.2138	3.90049
										17_bushy3	11.3533	3.36947
										17_bushy3	20.5604	4.53436
										18_lutescent0	12.1961	3.4923
										18_lutescent0	13.2321	3.6376
										18_lutescent0	18.3559	4.28438
										18_lutescent0	14.1073	3.75597
										18_lutescent0	16.9291	4.1145
										18_lutescent0	13.4341	3.66525
										18_lutescent0	10.7338	3.27625
										18_lutescent0	8.15881	2.85636
										18_lutescent0	15.4799	3.93445
										18_lutescent0	17.4995	4.18324
										18_lutescent0	9.35748	3.059
										18_lutescent0	5.66984	2.38114
										18_lutescent0	9.90726	3.14758
										18_lutescent3	29.3972	5.42192
										18_lutescent3	29.3867	5.42095
										18_lutescent3	28.0322	5.29454
										18_lutescent3	26.3599	5.13419
										18_lutescent3	33.0407	5.7481
										18_lutescent3	31.2242	5.58786
										18_lutescent3	21.7336	4.66193
										18_lutescent3	19.6903	4.43738
										18_lutescent3	27.4197	5.23638
										18_lutescent3	32.5724	5.70722
										18_lutescent3	23.1721	4.81374
										18_lutescent3	22.2726	4.71939
										18_lutescent3	22.7689	4.77168
										19_Never ripe0	5.55577	2.35707
										19_Never ripe0	3.0294	1.74052
										19_Never ripe0	3.10233	1.76134
										19_Never ripe0	3.60349	1.89829
										19_Never ripe0	4.15701	2.03887
										19_Never ripe0	4.66004	2.15871
										19_Never ripe0	2.48897	1.57765
										19_Never ripe0	2.25335	1.50112
										19_Never ripe0	2.88167	1.69755
										19_Never ripe0	2.65727	1.63011
										19_Never ripe0	2.22904	1.493
										19_Never ripe0	3.74374	1.93487
										19_Never ripe0	2.81248	1.67705
										19_Never ripe0	3.48942	1.868
										19_Never ripe0	1.93919	1.39255
										19_Never ripe0	2.76199	1.66192
										19_Never ripe0	1.9074	1.38109
										19_Never ripe0	2.52263	1.58828
										19_Never ripe0	2.70963	1.6461
										19_Never ripe0	3.02192	1.73837
										19_Never ripe3	18.872	4.34419
										19_Never ripe3	23.7524	4.87364
										19_Never ripe3	23.9904	4.898
										19_Never ripe3	26.8072	5.17757
										19_Never ripe3	25.7131	5.07081
										19_Never ripe3	23.7881	4.8773
										19_Never ripe3	19.3627	4.40031
										19_Never ripe3	24.8759	4.98757
										19_Never ripe3	22.4273	4.73575
										19_Never ripe3	24.5238	4.95215
										19_Never ripe3	20.9433	4.57639
										19_Never ripe3	26.3445	5.13269
										19_Never ripe3	23.5284	4.85061
										19_Never ripe3	25.6207	5.06169
										19_Never ripe3	21.6272	4.65051
										19_Never ripe3	24.1871	4.91804
										19_Never ripe3	21.4214	4.62833
										19_Never ripe3	22.1438	4.70572
										19_Never ripe3	24.4461	4.9443
										19_Never ripe3	24.0786	4.907
										20_sitiens0	5.91481	2.43204
										20_sitiens0	7.74928	2.78375
										20_sitiens0	6.41223	2.53224
										20_sitiens0	3.64463	1.90909
										20_sitiens0	5.70911	2.38937
										20_sitiens0	4.92745	2.21979
										20_sitiens0	3.99806	1.99951
										20_sitiens0	5.07518	2.25282
										20_sitiens0	6.74883	2.59785
										20_sitiens0	4.16636	2.04117
										20_sitiens0	4.85265	2.20287
										20_sitiens0	5.18364	2.27676
										20_sitiens0	6.43841	2.5374
										20_sitiens0	5.01908	2.24033
										20_sitiens0	5.54081	2.35389
										20_sitiens3	18.4744	4.29819
										20_sitiens3	19.8023	4.44998
										20_sitiens3	19.9395	4.46537
										20_sitiens3	20.4379	4.52083
										20_sitiens3	21.9674	4.68694
										20_sitiens3	14.4809	3.80538
										20_sitiens3	15.253	3.90551
										20_sitiens3	20.2622	4.50136
										20_sitiens3	24.0996	4.90913
										20_sitiens3	12.2402	3.4986
										20_sitiens3	11.4485	3.38356
										20_sitiens3	22.8424	4.77937
										20_sitiens3	14.553	3.81484
										20_sitiens3	16.3653	4.0454
										20_sitiens3	20.7949	4.56014
[truncated: 32 more columns]

## Sheet: scatter plots and LR number
Genotype	plant	length pr	lateral root	SQRT																genotype	Recuento	Promedio	Mediana	DE	CV	Mínimo	Máximo	Rango	Sesgo	Curtosis			genotype	Casos	Media	Grupos Homogéneos
01_S. corneliomulleri	2	16.9776	9	3																01_S. corneliomulleri	17	6	6	2.42384	0.403973	3	11	8	0.753559	-0.604111			05_S. chielewskii	7	3	X	a
01_S. corneliomulleri	4	28.5624	9	3																02_S. peruvianum	15	10.9333	12	2.89005	0.264334	6	15	9	-0.818463	-0.691638			08_S. cheesmaniae	10	4.1	X	a
01_S. corneliomulleri	5	18.6768	7	2.64575																03_S. chilense	18	7.5	7	3.5021	0.466947	2	15	13	0.816582	-0.42641			06_S. arcanum	16	4.8125	X	a
01_S. corneliomulleri	6	26.0659	5	2.23607																04_S. huaylasense	14	7.71429	7.5	2.16364	0.280471	4	12	8	0.656281	0.203469			01_S. corneliomulleri	17	6	XX	ab
01_S. corneliomulleri	7	18.2909	8	2.82843																05_S. chielewskii	7	3	3	1.41421	0.471405	2	6	4	2.13854	2.37627			07_S. galapagense	10	6.1	XX	ab
01_S. corneliomulleri	8	28.2502	3	1.73205																06_S. arcanum	16	4.8125	5	2.22767	0.462892	1	10	9	0.776311	0.54939			03_S. chilense	18	7.5	X	b
01_S. corneliomulleri	10	35.9135	11	3.31662																07_S. galapagense	10	6.1	6.5	1.37032	0.224643	4	8	4	-0.702403	-0.562853			04_S. huaylasense	14	7.71429	X	b
01_S. corneliomulleri	11	30.8893	4	2																08_S. cheesmaniae	10	4.1	3.5	2.28279	0.556777	1	8	7	0.435908	-0.701864			02_S. peruvianum	15	10.9333	X	c
01_S. corneliomulleri	12	22.5335	5	2.23607																09_S. pimpinelifollium	18	16	16.5	2.54374	0.158983	12	21	9	0	-0.649125			12_"Moneymaker"	9	11.7778	X	c
01_S. corneliomulleri	13	25.469	6	2.44949																10_"Ailsa Craig"	20	12.7	13	2.22663	0.175325	8	16	8	-0.857675	-0.498266			13_"M82"	11	11.9091	X	c
01_S. corneliomulleri	14	37.6466	8	2.82843																11_"Craigella"	30	12.6667	13	2.70801	0.21379	9	18	9	1.02245	-0.72083			11_"Craigella"	30	12.6667	X	c
01_S. corneliomulleri	15	21.196	6	2.44949																12_"Moneymaker"	9	11.7778	11	3.56293	0.302513	7	19	12	0.965264	0.747899			10_"Ailsa Craig"	20	12.7	X	c
01_S. corneliomulleri	16	21.079	4	2																13_"M82"	11	11.9091	13	5.26222	0.441865	3	19	16	-0.589965	-0.681879			09_S. pimpinelifollium	18	16	X	d
01_S. corneliomulleri	17	26.2669	3	1.73205
01_S. corneliomulleri	18	21.9747	3	1.73205																Total	195	9.57949	9	4.65928	0.486381	1	21	20	0.91451	-2.54405
01_S. corneliomulleri	19	33.2797	7	2.64575
01_S. corneliomulleri	21	31.7526	4	2
02_S. peruvianum	1	23.8056	12	3.4641																genotype	Recuento	Promedio	Mediana	DE	CV	Mínimo	Máximo	Rango	Sesgo	Curtosis			genotype	Casos	Media	Grupos Homogéneos
02_S. peruvianum	2	22.104	11	3.31662																14_"Micro-Tom"	15	28.5333	28	7.09997	0.248831	16	40	24	-0.063881	-0.679992			20_sitiens	13	1.86723	X	a
02_S. peruvianum	3	28.7528	12	3.4641																15_anthocyanin absent	11	5.45455	5	0.8202	0.15037	4	7	3	0.237957	0.126928			15_anthocyanin absent	11	2.32946	XX	ab
02_S. peruvianum	4	25.5991	8	2.82843																16_anthocyaninless	16	24.25	23.5	5.2978	0.218466	16	32	16	0.271109	-1.121			17_bushy	15	2.57778	X	b
02_S. peruvianum	5	35.1261	8	2.82843																17_bushy	15	6.93333	6	2.91466	0.420384	3	12	9	0.751498	-0.541092			19_Never ripe	16	2.74152	X	b
02_S. peruvianum	7	33.5587	15	3.87298																18_lutescent	8	14	14	1.92725	0.137661	11	16	5	-0.368704	-0.734157			18_lutescent	8	3.7337	X	c
02_S. peruvianum	8	18.7377	11	3.31662																19_Never ripe	16	8	8	3.79473	0.474342	2	14	12	0.109291	-0.627244			16_anthocyaninless	16	4.89667	X	d
02_S. peruvianum	9	30.8662	12	3.4641																20_sitiens	13	3.61538	3	1.44559	0.399845	2	6	4	0.896141	-0.724998			14_"Micro-Tom"	15	5.30132	X	d
02_S. peruvianum	10	24.9607	14	3.74166
02_S. peruvianum	11	29.0206	13	3.60555																Total	94	13.4787	9	10.3037	0.764442	2	40	38	3.38918	-0.841409
02_S. peruvianum	12	21.6844	14	3.74166
02_S. peruvianum	13	26.9199	13	3.60555
02_S. peruvianum	14	18.38	9	3
02_S. peruvianum	18	12.83	6	2.44949
02_S. peruvianum	20	12.9909	6	2.44949																					mediana
03_S. chilense	1	49.9143	12	3.4641
03_S. chilense	2	42.1773	12	3.4641
03_S. chilense	3	33.9723	4	2
03_S. chilense	4	32.5823	8	2.82843
03_S. chilense	5	39.0098	8	2.82843
03_S. chilense	7	34.5785	2	1.41421
03_S. chilense	9	38.1292	6	2.44949
03_S. chilense	10	41.3089	10	3.16228
03_S. chilense	11	27.7545	6	2.44949
03_S. chilense	12	41.5076	10	3.16228
03_S. chilense	13	45.5378	10	3.16228
03_S. chilense	14	43.5329	15	3.87298
03_S. chilense	15	24.189	5	2.23607
03_S. chilense	17	38.071	5	2.23607
03_S. chilense	18	30.8107	9	3																					promedio
03_S. chilense	19	15.2525	4	2
03_S. chilense	20	18.8964	4	2
03_S. chilense	24	22.6904	5	2.23607
04_S. huaylasense	1	36.9899	8	2.82843
04_S. huaylasense	2	34.5775	12	3.4641
04_S. huaylasense	3	30.31	11	3.31662
04_S. huaylasense	4	33.8825	10	3.16228
04_S. huaylasense	6	23.109	7	2.64575
04_S. huaylasense	7	35.4643	7	2.64575
04_S. huaylasense	9	18.7519	6	2.44949
04_S. huaylasense	10	21.7013	8	2.82843
04_S. huaylasense	11	31.4273	4	2
04_S. huaylasense	13	29.0444	7	2.64575
04_S. huaylasense	16	15.7098	8	2.82843
04_S. huaylasense	17	22.0935	8	2.82843
04_S. huaylasense	19	21.1067	5	2.23607
04_S. huaylasense	21	21.8281	7	2.64575
05_S. chielewskii	1	6.01473	2	1.41421
05_S. chielewskii	7	10.1258	3	1.73205
05_S. chielewskii	8	8.88813	3	1.73205
05_S. chielewskii	9	7.46685	2	1.41421
05_S. chielewskii	11	11.5607	6	2.44949
05_S. chielewskii	13	6.98686	2	1.41421
05_S. chielewskii	14	6.40167	3	1.73205
06_S. arcanum	1	25.9939	3	1.73205
06_S. arcanum	2	23.5022	6	2.44949
06_S. arcanum	3	24.439	5	2.23607
06_S. arcanum	4	30.0456	7	2.64575
06_S. arcanum	6	26.3691	5	2.23607
06_S. arcanum	8	23.9723	7	2.64575
06_S. arcanum	9	25.7952	6	2.44949
06_S. arcanum	10	33.3354	10	3.16228
06_S. arcanum	11	20.4167	3	1.73205
06_S. arcanum	12	23.0857	6	2.44949
06_S. arcanum	13	23.019	4	2
06_S. arcanum	14	25.5195	2	1.41421
06_S. arcanum	16	20.5355	1	1
06_S. arcanum	19	21.7926	3	1.73205
06_S. arcanum	20	22.9616	4	2
06_S. arcanum	21	21.1865	5	2.23607
07_S. galapagense	2	23.3464	6	2.44949
07_S. galapagense	4	23.9132	6	2.44949
07_S. galapagense	5	23.3774	7	2.64575
07_S. galapagense	6	18.9745	8	2.82843
07_S. galapagense	7	20.3792	7	2.64575
07_S. galapagense	8	21.4583	4	2
07_S. galapagense	9	21.7563	7	2.64575
07_S. galapagense	11	21.2714	4	2
07_S. galapagense	12	22.014	5	2.23607
07_S. galapagense	13	27.0733	7	2.64575
08_S. cheesmaniae	2	23.5025	8	2.82843
08_S. cheesmaniae	3	22.6132	4	2
08_S. cheesmaniae	4	20.8466	6	2.44949
08_S. cheesmaniae	5	23.3155	6	2.44949
08_S. cheesmaniae	6	20.286	2	1.41421
08_S. cheesmaniae	7	24.9965	3	1.73205
08_S. cheesmaniae	8	10.1107	2	1.41421
08_S. cheesmaniae	9	15.0803	3	1.73205
08_S. cheesmaniae	12	12.5896	1	1
08_S. cheesmaniae	14	22.2939	6	2.44949
09_S. pimpinelifollium	1	42.6825	17	4.12311
09_S. pimpinelifollium	2	36.4687	13	3.60555
09_S. pimpinelifollium	3	36.4872	14	3.74166
09_S. pimpinelifollium	4	34.6589	14	3.74166
09_S. pimpinelifollium	5	39.2115	12	3.4641
09_S. pimpinelifollium	6	40.8224	18	4.24264
09_S. pimpinelifollium	7	31.298	14	3.74166
09_S. pimpinelifollium	8	31.1529	14	3.74166
09_S. pimpinelifollium	9	34.4032	18	4.24264
09_S. pimpinelifollium	10	31.5222	12	3.4641
09_S. pimpinelifollium	11	36.9067	18	4.24264
09_S. pimpinelifollium	13	36.6898	16	4
09_S. pimpinelifollium	14	37.6799	17	4.12311
09_S. pimpinelifollium	18	36.5636	18	4.24264
09_S. pimpinelifollium	19	39.6573	19	4.3589
09_S. pimpinelifollium	20	40.9959	17	4.12311
09_S. pimpinelifollium	21	38.4393	16	4
09_S. pimpinelifollium	22	41.015	21	4.58258
10_"Ailsa Craig"	1	38.6137	14	3.74166
10_"Ailsa Craig"	2	27.5316	16	4
10_"Ailsa Craig"	3	40.6946	13	3.60555
10_"Ailsa Craig"	4	35.1917	8	2.82843
10_"Ailsa Craig"	5	39.7287	15	3.87298
10_"Ailsa Craig"	6	49.2859	15	3.87298
10_"Ailsa Craig"	7	44.8696	14	3.74166
10_"Ailsa Craig"	8	34.9551	13	3.60555
10_"Ailsa Craig"	9	32.7274	9	3
10_"Ailsa Craig"	10	22.9121	11	3.31662
10_"Ailsa Craig"	11	35.0848	13	3.60555
10_"Ailsa Craig"	13	23.5154	15	3.87298
10_"Ailsa Craig"	14	30.4759	15	3.87298
10_"Ailsa Craig"	15	29.5027	12	3.4641
10_"Ailsa Craig"	16	30.3794	11	3.31662
10_"Ailsa Craig"	18	21.9795	12	3.4641
10_"Ailsa Craig"	19	26.084	12	3.4641
10_"Ailsa Craig"	20	25.1455	11	3.31662
10_"Ailsa Craig"	21	29.5881	15	3.87298
10_"Ailsa Craig"	22	20.8842	10	3.16228
11_"Craigella"	2	28.4766	18	4.24264
11_"Craigella"	12	28.4227	17	4.12311
11_"Craigella"	13	22.6605	14	3.74166
11_"Craigella"	14	26.9428	13	3.60555
11_"Craigella"	15	29.4036	9	3
11_"Craigella"	16	17.3945	15	3.87298
11_"Craigella"	17	17.5046	9	3
11_"Craigella"	18	20.7309	14	3.74166
11_"Craigella"	19	20.5029	10	3.16228
11_"Craigella"	24	18.454	16	4
11_"Craigella"	27	17.7508	11	3.31662
11_"Craigella"	28	21.1252	9	3
11_"Craigella"	2	25.2816	14	3.74166
11_"Craigella"	3	29.278	18	4.24264
11_"Craigella"	4	25.9204	14	3.74166
11_"Craigella"	6	24.7448	14	3.74166
11_"Craigella"	8	24.993	10	3.16228
11_"Craigella"	9	29.0695	9	3
11_"Craigella"	11	21.8131	10	3.16228
11_"Craigella"	13	30.4388	11	3.31662
11_"Craigella"	14	26.5543	12	3.4641
11_"Craigella"	15	23.0473	13	3.60555
11_"Craigella"	16	27.7312	11	3.31662
11_"Craigella"	17	29.2929	13	3.60555
11_"Craigella"	18	25.6918	13	3.60555
11_"Craigella"	20	32.1198	11	3.31662
11_"Craigella"	21	31.5852	11	3.31662
11_"Craigella"	22	26.1048	11	3.31662
11_"Craigella"	25	27.4028	17	4.12311
11_"Craigella"	28	29.196	13	3.60555
12_"Moneymaker"	1	31.1381	10	3.16228
12_"Moneymaker"	2	33.3118	13	3.60555
12_"Moneymaker"	3	33.4098	13	3.60555
12_"Moneymaker"	4	56.5493	19	4.3589
12_"Moneymaker"	5	33.6648	8	2.82843
12_"Moneymaker"	6	43.7304	14	3.74166
12_"Moneymaker"	7	49.4494	11	3.31662
12_"Moneymaker"	8	22.626	7	2.64575
12_"Moneymaker"	9	22.7218	11	3.31662
13_"M82"	1	43.6918	19	4.3589
13_"M82"	2	43.5342	12	3.4641
13_"M82"	3	47.1941	17	4.12311
13_"M82"	4	50.4279	13	3.60555
13_"M82"	5	46.4399	15	3.87298
13_"M82"	6	55.2194	17	4.12311
13_"M82"	7	63.4436	14	3.74166
13_"M82"	8	8.74698	3	1.73205
13_"M82"	9	25.5818	5	2.23607
13_"M82"	10	17.0479	7	2.64575
13_"M82"	11	27.0271	9	3
14_"Micro-Tom"	2	37.23	23	4.79583
14_"Micro-Tom"	3	46.4998	31	5.56776
14_"Micro-Tom"	5	47.972	35	5.91608
14_"Micro-Tom"	8	37.7789	24	4.89898
14_"Micro-Tom"	9	44.8483	28	5.2915
14_"Micro-Tom"	10	39.8645	26	5.09902
14_"Micro-Tom"	11	43.3841	34	5.83095
14_"Micro-Tom"	12	38.9393	29	5.38516
14_"Micro-Tom"	13	38.5626	22	4.69042
14_"Micro-Tom"	15	30.0852	19	4.3589
14_"Micro-Tom"	18	40.6266	27	5.19615
14_"Micro-Tom"	20	29.3595	16	4
15_anthocyanin absent	1	16.5768	6	2.44949
15_anthocyanin absent	5	20.1916	5	2.23607
15_anthocyanin absent	6	19.6796	6	2.44949
15_anthocyanin absent	8	17.4944	5	2.23607
15_anthocyanin absent	11	13.4101	6	2.44949
15_anthocyanin absent	12	21.6879	5	2.23607
15_anthocyanin absent	13	15.6756	5	2.23607
15_anthocyanin absent	14	18.8909	6	2.44949
15_anthocyanin absent	16	16.0233	7	2.64575
15_anthocyanin absent	17	15.153	4	2
15_anthocyanin absent	18	17.4859	5	2.23607
16_anthocyaninless	1	46.667	27	5.19615
16_anthocyaninless	2	42.5711	20	4.47214
16_anthocyaninless	3	47.0154	28	5.2915
16_anthocyaninless	4	52.0806	31	5.56776
16_anthocyaninless	5	46.9793	32	5.65685
16_anthocyaninless	7	49.1105	32	5.65685
16_anthocyaninless	8	38.8128	22	4.69042
16_anthocyaninless	9	31.8145	19	4.3589
16_anthocyaninless	10	39.5421	25	5
16_anthocyaninless	11	46.9422	21	4.58258
16_anthocyaninless	12	43.6086	26	5.09902
16_anthocyaninless	13	39.3352	21	4.58258
16_anthocyaninless	14	44.4157	30	5.47723
16_anthocyaninless	17	32.7805	20	4.47214
16_anthocyaninless	18	30.5501	16	4
16_anthocyaninless	20	42.9691	18	4.24264
17_bushy	1	17.6248	3	1.73205
17_bushy	3	25.7611	7	2.64575
17_bushy	5	24.7571	6	2.44949
17_bushy	6	26.6764	9	3
17_bushy	7	26.8165	12	3.4641
17_bushy	8	21.5149	7	2.64575
17_bushy	9	22.6518	9	3
17_bushy	10	18.6499	6	2.44949
17_bushy	11	20.0516	5	2.23607
17_bushy	12	17.4141	4	2
17_bushy	14	17.0104	3	1.73205
17_bushy	16	16.7121	6	2.44949
17_bushy	17	23.8353	10	3.16228
17_bushy	18	22.2867	5	2.23607
17_bushy	21	27.7377	12	3.4641
18_lutescent	2	40.269	14	3.74166
18_lutescent	4	32.8762	16	4
18_lutescent	7	40.5017	16	4
18_lutescent	9	26.7347	11	3.31662
18_lutescent	10	26.6085	12	3.4641
18_lutescent	13	38.0335	14	3.74166
18_lutescent	17	30.6185	16	4
18_lutescent	18	28.0662	13	3.60555
19_Never ripe	2	30.0481	7	2.64575
19_Never ripe	4	29.8632	3	1.73205
19_Never ripe	5	36.1789	8	2.82843
19_Never ripe	6	33.0728	9	3
19_Never ripe	7	30.5642	11	3.31662
19_Never ripe	9	32.0777	8	2.82843
19_Never ripe	10	28.1446	2	1.41421
19_Never ripe	11	32.5457	9	3
19_Never ripe	13	34.7758	9	3
19_Never ripe	14	31.6345	13	3.60555
19_Never ripe	16	26.0659	3	1.73205
19_Never ripe	17	30.8711	6	2.44949
19_Never ripe	18	26.9533	4	2
19_Never ripe	19	30.8398	14	3.74166
19_Never ripe	20	31.968	14	3.74166
19_Never ripe	21	32.834	8	2.82843
20_sitiens	2	24.0107	3	1.73205
20_sitiens	3	25.9228	5	2.23607
20_sitiens	4	25.2263	4	2
20_sitiens	5	27.7259	2	1.41421
20_sitiens	8	15.9391	3	1.73205
20_sitiens	10	25.5105	3	1.73205
20_sitiens	11	29.7373	5	2.23607
20_sitiens	12	17.3202	6	2.44949
20_sitiens	13	17.1885	6	2.44949
20_sitiens	14	29.0037	3	1.73205
20_sitiens	16	18.0763	3	1.73205
20_sitiens	18	19.9424	2	1.41421
20_sitiens	21	26.4251	2	1.41421

## Sheet: LR distribution
Genotype	plant	length pr	position	1	2	3	4				Genotype	plant	75-100	50-75	25-50	0-25	TOTAL		zona 1	zona 2	zona 3	zona 4
01_S. corneliomulleri	2	16.9776	2.54056	4.24441	8.48882	12.7332	16.9776				01_S. corneliomulleri	2	0	4	2	3	9		0	44.4444	22.2222	33.3333
01_S. corneliomulleri			3.18479	3	2	4	0	9			01_S. corneliomulleri	4	0	1	4	4	9		0	11.1111	44.4444	44.4444
01_S. corneliomulleri			4.1404								01_S. corneliomulleri	5	0	2	2	3	7		0	28.5714	28.5714	42.8571
01_S. corneliomulleri			4.64048								01_S. corneliomulleri	6	1	0	1	3	5		20	0	20	60
01_S. corneliomulleri			6.32243								01_S. corneliomulleri	7	1	2	3	2	8		12.5	25	37.5	25
01_S. corneliomulleri			9.21468								01_S. corneliomulleri	8	0	1	0	2	3		0	33.3333	0	66.6667
01_S. corneliomulleri			9.30704								01_S. corneliomulleri	10	2	3	4	2	11		18.1818	27.2727	36.3636	18.1818
01_S. corneliomulleri			11.2493								01_S. corneliomulleri	11	0	2	2	0	4		0	50	50	0
01_S. corneliomulleri			11.6418								01_S. corneliomulleri	12	0	3	2	0	5		0	60	40	0
01_S. corneliomulleri	4	28.5624	1.17532	7.14059	14.2812	21.4218	28.5624				01_S. corneliomulleri	13	0	0	3	3	6		0	0	50	50
01_S. corneliomulleri			2.22329	4	4	1	0	9			01_S. corneliomulleri	14	0	3	4	1	8		0	37.5	50	12.5
01_S. corneliomulleri			4.47063								01_S. corneliomulleri	15	1	1	2	2	6		16.6667	16.6667	33.3333	33.3333
01_S. corneliomulleri			5.92796								01_S. corneliomulleri	16	0	2	2	0	4		0	50	50	0
01_S. corneliomulleri			8.872								01_S. corneliomulleri	17	0	2	1	0	3		0	66.6667	33.3333	0
01_S. corneliomulleri			9.47236								01_S. corneliomulleri	18	0	0	1	2	3		0	0	33.3333	66.6667
01_S. corneliomulleri			11.085								01_S. corneliomulleri	19	0	3	3	1	7		0	42.8571	42.8571	14.2857
01_S. corneliomulleri			13.596								01_S. corneliomulleri	21	0	2	2	0	4		0	50	50	0
01_S. corneliomulleri			16.3823																3.96168	31.9661	36.5858	27.4864
01_S. corneliomulleri	5	18.6768	2.00823	4.6692	9.3384	14.0076	18.6768												7.4908	21.0492	13.5306	24.3612
01_S. corneliomulleri			2.86984	3	2	2	0	7
01_S. corneliomulleri			4.6201								02_S. peruvianum	1	3	1	4	4	12		25	8.33333	33.3333	33.3333
01_S. corneliomulleri			5.12414								02_S. peruvianum	2	2	4	2	3	11		18.1818	36.3636	18.1818	27.2727
01_S. corneliomulleri			6.03918								02_S. peruvianum	3	1	3	4	4	12		8.33333	25	33.3333	33.3333
01_S. corneliomulleri			10.6107								02_S. peruvianum	4	0	3	3	2	8		0	37.5	37.5	25
01_S. corneliomulleri			10.8878								02_S. peruvianum	5	2	0	2	4	8		25	0	25	50
01_S. corneliomulleri	6	26.0659	1.91026	6.51647	13.0329	19.5494	26.0659				02_S. peruvianum	7	1	4	8	2	15		6.66667	26.6667	53.3333	13.3333
01_S. corneliomulleri			3.11359	3	1	0	1	5			02_S. peruvianum	8	1	2	5	3	11		9.09091	18.1818	45.4545	27.2727
01_S. corneliomulleri			4.68802								02_S. peruvianum	9	1	2	3	6	12		8.33333	16.6667	25	50
01_S. corneliomulleri			7.15603								02_S. peruvianum	10	1	1	6	6	14		7.14286	7.14286	42.8571	42.8571
01_S. corneliomulleri			20.0881								02_S. peruvianum	11	2	4	2	5	13		15.3846	30.7692	15.3846	38.4615
01_S. corneliomulleri	7	18.2909	2.30869	4.57273	9.14547	13.7182	18.2909				02_S. peruvianum	12	1	4	3	6	14		7.14286	28.5714	21.4286	42.8571
01_S. corneliomulleri			2.37797	2	3	2	1	8			02_S. peruvianum	13	2	2	3	6	13		15.3846	15.3846	23.0769	46.1538
01_S. corneliomulleri			4.99873								02_S. peruvianum	14	0	2	3	4	9		0	22.2222	33.3333	44.4444
01_S. corneliomulleri			6.13742								02_S. peruvianum	18	1	1	2	2	6		16.6667	16.6667	33.3333	33.3333
01_S. corneliomulleri			9.0887								02_S. peruvianum	20	0	1	3	2	6		0	16.6667	50	33.3333
01_S. corneliomulleri			10.1495																10.8218	20.4091	32.7034	36.0657
01_S. corneliomulleri			11.4244																8.20741	10.6727	11.5398	10.2887
01_S. corneliomulleri			15.1074
01_S. corneliomulleri	8	28.2502	4.84858	7.06256	14.1251	21.1877	28.2502				03_S. chilense	1	1	1	8	2	12		8.33333	8.33333	66.6667	16.6667
01_S. corneliomulleri			5.38923	2	0	1	0	3			03_S. chilense	2	3	2	5	2	12		25	16.6667	41.6667	16.6667
01_S. corneliomulleri			19.2535								03_S. chilense	3	0	0	4	0	4		0	0	100	0
01_S. corneliomulleri	10	35.9135	7.64506	8.97837	17.9567	26.9351	35.9135				03_S. chilense	4	4	3	1	0	8		50	37.5	12.5	0
01_S. corneliomulleri			7.95481	2	4	3	2	11			03_S. chilense	5	0	4	4	0	8		0	50	50	0
01_S. corneliomulleri			12.1824								03_S. chilense	7	0	0	0	2	2		0	0	0	100
01_S. corneliomulleri			13.8977								03_S. chilense	9	0	2	1	3	6		0	33.3333	16.6667	50
01_S. corneliomulleri			15.1901								03_S. chilense	10	2	2	3	3	10		20	20	30	30
01_S. corneliomulleri			16.8734								03_S. chilense	11	0	2	3	1	6		0	33.3333	50	16.6667
01_S. corneliomulleri			20.1638								03_S. chilense	12	1	3	2	4	10		10	30	20	40
01_S. corneliomulleri			21.441								03_S. chilense	13	2	2	4	2	10		20	20	40	20
01_S. corneliomulleri			26.7364								03_S. chilense	14	1	3	5	6	15		6.66667	20	33.3333	40
01_S. corneliomulleri			29.499								03_S. chilense	15	0	0	0	5	5		0	0	0	100
01_S. corneliomulleri			34.3136								03_S. chilense	17	0	0	5	0	5		0	0	100	0
01_S. corneliomulleri	11	30.8893	12.4783	7.72233	15.4447	23.167	30.8893				03_S. chilense	18	1	2	3	3	9		11.1111	22.2222	33.3333	33.3333
01_S. corneliomulleri			15.3323	0	2	2	0	4			03_S. chilense	19	0	0	0	4	4		0	0	0	100
01_S. corneliomulleri			16.8962								03_S. chilense	20	0	0	0	4	4		0	0	0	100
01_S. corneliomulleri			20.3842								03_S. chilense	24	0	2	1	2	5		0	40	20	40
01_S. corneliomulleri	12	22.5335	9.56008	5.63339	11.2668	16.9002	22.5335												8.39506	18.4105	34.1204	39.0741
01_S. corneliomulleri			11.2332	0	2	3	0	5											13.2704	16.3931	30.8518	36.8322
01_S. corneliomulleri			11.7962
01_S. corneliomulleri			13.6699								04_S. huaylasense	1	3	3	1	1	8		37.5	37.5	12.5	12.5
01_S. corneliomulleri			16.2675								04_S. huaylasense	2	3	4	1	4	12		25	33.3333	8.33333	33.3333
01_S. corneliomulleri	13	25.469	2.92258	6.36724	12.7345	19.1017	25.469				04_S. huaylasense	3	3	1	3	4	11		27.2727	9.09091	27.2727	36.3636
01_S. corneliomulleri			4.03983	3	3	0	0	6			04_S. huaylasense	4	2	2	3	3	10		20	20	30	30
01_S. corneliomulleri			5.36326								04_S. huaylasense	6	0	2	5	0	7		0	28.5714	71.4286	0
01_S. corneliomulleri			6.73943								04_S. huaylasense	7	2	1	1	3	7		28.5714	14.2857	14.2857	42.8571
01_S. corneliomulleri			8.84002								04_S. huaylasense	9	1	0	3	2	6		16.6667	0	50	33.3333
01_S. corneliomulleri			11.8559								04_S. huaylasense	10	1	3	2	2	8		12.5	37.5	25	25
01_S. corneliomulleri	14	37.6466	7.16519	9.41166	18.8233	28.235	37.6466				04_S. huaylasense	11	0	1	2	1	4		0	25	50	25
01_S. corneliomulleri			11.8353	1	4	3	0	8			04_S. huaylasense	13	1	0	2	4	7		14.2857	0	28.5714	57.1429
01_S. corneliomulleri			13.1165								04_S. huaylasense	16	0	2	3	3	8		0	25	37.5	37.5
01_S. corneliomulleri			15.7924								04_S. huaylasense	17	0	3	2	3	8		0	37.5	25	37.5
01_S. corneliomulleri			18.2445								04_S. huaylasense	19	0	1	1	3	5		0	20	20	60
01_S. corneliomulleri			20.5737								04_S. huaylasense	21	0	2	5	0	7		0	28.5714	71.4286	0
01_S. corneliomulleri			25.115																12.9855	22.5966	33.6657	30.7522
01_S. corneliomulleri			26.6597																13.2106	12.8624	20.1588	17.8144
01_S. corneliomulleri	15	21.196	3.44767	5.29901	10.598	15.897	21.196
01_S. corneliomulleri			4.58009	2	2	1	1	6			05_S. chmielewskii	1	0	1	1	0	2		0	50	50	0
01_S. corneliomulleri			7.10384								05_S. chmielewskii	7	1	0	1	1	3		33.3333	0	33.3333	33.3333
01_S. corneliomulleri			8.47509								05_S. chmielewskii	8	0	2	1	0	3		0	66.6667	33.3333	0
01_S. corneliomulleri			15.5118								05_S. chmielewskii	9	0	0	2	0	2		0	0	100	0
01_S. corneliomulleri			17.6698								05_S. chmielewskii	11	2	2	2	0	6		33.3333	33.3333	33.3333	0
01_S. corneliomulleri	16	21.079	6.1642	5.26976	10.5395	15.8093	21.079				05_S. chmielewskii	13	0	0	2	0	2		0	0	100	0
01_S. corneliomulleri			10.37	0	2	2	0	4			05_S. chmielewskii	14	0	0	2	1	3		0	0	66.6667	33.3333
01_S. corneliomulleri			11.5391																9.52381	21.4286	59.5238	9.52381
01_S. corneliomulleri			15.7214																16.265	28.4056	30.2109	16.265
01_S. corneliomulleri	17	26.2669	12.3351	6.56672	13.1334	19.7001	26.2669
01_S. corneliomulleri			14.6412	0	1	2	0	3			06_S. arcanum	1	0	2	1	0	3		0	66.6667	33.3333	0
01_S. corneliomulleri			15.6357								06_S. arcanum	2	2	2	1	1	6		33.3333	33.3333	16.6667	16.6667
01_S. corneliomulleri	18	21.9747	1.07339	5.49368	10.9874	16.481	21.9747				06_S. arcanum	3	2	1	2	0	5		40	20	40	0
01_S. corneliomulleri			3.78883	2	1	0	0	3			06_S. arcanum	4	1	3	2	1	7		14.2857	42.8571	28.5714	14.2857
01_S. corneliomulleri			8.2443								06_S. arcanum	6	1	1	2	1	5		20	20	40	20
01_S. corneliomulleri	19	33.2797	1.87297	8.31992	16.6398	24.9598	33.2797				06_S. arcanum	8	1	2	3	1	7		14.2857	28.5714	42.8571	14.2857
01_S. corneliomulleri			10.0495	1	3	3	0	7			06_S. arcanum	9	0	1	4	1	6		0	16.6667	66.6667	16.6667
01_S. corneliomulleri			13.1311								06_S. arcanum	10	0	3	3	4	10		0	30	30	40
01_S. corneliomulleri			14.5542								06_S. arcanum	11	0	2	1	0	3		0	66.6667	33.3333	0
01_S. corneliomulleri			21.0647								06_S. arcanum	12	0	3	2	1	6		0	50	33.3333	16.6667
01_S. corneliomulleri			22.686								06_S. arcanum	13	0	2	1	1	4		0	50	25	25
01_S. corneliomulleri			23.7403								06_S. arcanum	14	1	0	1	0	2		50	0	50	0
01_S. corneliomulleri	21	31.7526	10.0845	7.93815	15.8763	23.8144	31.7526				06_S. arcanum	16	0	1	0	0	1		0	100	0	0
01_S. corneliomulleri			14.7834	0	2	2	0	4			06_S. arcanum	19	0	2	1	0	3		0	66.6667	33.3333	0
01_S. corneliomulleri			18.5274								06_S. arcanum	20	0	1	3	0	4		0	25	75	0
01_S. corneliomulleri			22.1642								06_S. arcanum	21	1	1	3	0	5		20	20	60	0
02_S. peruvianum	1	23.8056	0.726344	5.9514	11.9028	17.8542	23.8056												11.994	39.7768	38.006	10.2232
02_S. peruvianum			1.28217	4	4	1	3	12											16.5682	25.5411	18.5445	12.0948
02_S. peruvianum			3.29232
02_S. peruvianum			5.49648								07_S. galapagense	2	3	0	1	2	6		50	0	16.6667	33.3333
02_S. peruvianum			7.02376								07_S. galapagense	4	1	2	0	3	6		16.6667	33.3333	0	50
02_S. peruvianum			7.85668								07_S. galapagense	5	2	0	3	2	7		28.5714	0	42.8571	28.5714
02_S. peruvianum			9.21276								07_S. galapagense	6	2	3	1	2	8		25	37.5	12.5	25
02_S. peruvianum			10.2591								07_S. galapagense	7	0	2	1	4	7		0	28.5714	14.2857	57.1429
02_S. peruvianum			15.0061								07_S. galapagense	8	1	1	2	0	4		25	25	50	0
02_S. peruvianum			18.4099								07_S. galapagense	9	2	2	1	2	7		28.5714	28.5714	14.2857	28.5714
02_S. peruvianum			19.0661								07_S. galapagense	11	0	2	2	0	4		0	50	50	0
02_S. peruvianum			19.9293								07_S. galapagense	12	1	0	3	1	5		20	0	60	20
02_S. peruvianum	2	22.104	2.85891	5.526	11.052	16.578	22.104				07_S. galapagense	13	3	2	2	0	7		42.8571	28.5714	28.5714	0
02_S. peruvianum			4.28987	3	2	4	2	11											23.6667	23.1548	28.9167	24.2619
02_S. peruvianum			5.45658																15.9724	17.4162	20.3675	20.132
02_S. peruvianum			9.87271
02_S. peruvianum			10.9303								08_S. cheesmaniae	2	2	1	3	2	8		25	12.5	37.5	25
02_S. peruvianum			11.4152								08_S. cheesmaniae	3	0	2	2	0	4		0	50	50	0
02_S. peruvianum			12.9068								08_S. cheesmaniae	4	1	1	2	2	6		16.6667	16.6667	33.3333	33.3333
02_S. peruvianum			14.3681								08_S. cheesmaniae	5	0	0	5	1	6		0	0	83.3333	16.6667
02_S. peruvianum			16.4591								08_S. cheesmaniae	6	0	0	1	1	2		0	0	50	50
02_S. peruvianum			16.8916								08_S. cheesmaniae	7	0	2	1	0	3		0	66.6667	33.3333	0
02_S. peruvianum			17.7261								08_S. cheesmaniae	8	0	1	1	0	2		0	50	50	0
02_S. peruvianum	3	28.7528	3.56024	7.1882	14.3764	21.5646	28.7528				08_S. cheesmaniae	9	1	1	1	0	3		33.3333	33.3333	33.3333	0
02_S. peruvianum			4.23316	4	4	3	1	12			08_S. cheesmaniae	12	0	0	1	0	1		0	0	100	0
02_S. peruvianum			4.83681								08_S. cheesmaniae	14	0	3	3	0	6		0	50	50	0
02_S. peruvianum			6.8971																7.5	27.9167	52.0833	12.5
02_S. peruvianum			8.15058																12.699	25.1577	22.5026	18.1089
02_S. peruvianum			9.03759
02_S. peruvianum			12.8439								09_S. pimpinelifollium	1	1	8	3	5	17		5.88235	47.0588	17.6471	29.4118
02_S. peruvianum			14.1634								09_S. pimpinelifollium	2	2	2	5	4	13		15.3846	15.3846	38.4615	30.7692
02_S. peruvianum			15.9216								09_S. pimpinelifollium	3	3	4	3	4	14		21.4286	28.5714	21.4286	28.5714
02_S. peruvianum			16.7347								09_S. pimpinelifollium	4	2	6	2	4	14		14.2857	42.8571	14.2857	28.5714
02_S. peruvianum			19.5415								09_S. pimpinelifollium	5	3	3	3	3	12		25	25	25	25
02_S. peruvianum			22.1709								09_S. pimpinelifollium	6	3	5	5	5	18		16.6667	27.7778	27.7778	27.7778
02_S. peruvianum	4	25.5991	2.56694	6.39979	12.7996	19.1994	25.5991				09_S. pimpinelifollium	7	3	5	2	4	14		21.4286	35.7143	14.2857	28.5714
02_S. peruvianum			5.48624	2	3	3	0	8			09_S. pimpinelifollium	8	3	3	3	5	14		21.4286	21.4286	21.4286	35.7143
02_S. peruvianum			7.41563								09_S. pimpinelifollium	9	4	4	6	4	18		22.2222	22.2222	33.3333	22.2222
02_S. peruvianum			8.59491								09_S. pimpinelifollium	10	0	6	3	3	12		0	50	25	25
02_S. peruvianum			9.51062								09_S. pimpinelifollium	11	4	4	4	6	18		22.2222	22.2222	22.2222	33.3333
02_S. peruvianum			13.9677								09_S. pimpinelifollium	13	5	4	4	3	16		31.25	25	25	18.75
02_S. peruvianum			15.9473								09_S. pimpinelifollium	14	3	4	6	4	17		17.6471	23.5294	35.2941	23.5294
02_S. peruvianum			16.3566								09_S. pimpinelifollium	18	2	5	6	5	18		11.1111	27.7778	33.3333	27.7778
02_S. peruvianum	5	35.1261	1.38642	8.78153	17.5631	26.3446	35.1261				09_S. pimpinelifollium	19	4	4	6	5	19		21.0526	21.0526	31.5789	26.3158
02_S. peruvianum			3.85743	4	2	0	2	8			09_S. pimpinelifollium	20	4	4	3	6	17		23.5294	23.5294	17.6471	35.2941
02_S. peruvianum			6.2097								09_S. pimpinelifollium	21	3	5	3	5	16		18.75	31.25	18.75	31.25
02_S. peruvianum			7.57534								09_S. pimpinelifollium	22	3	8	6	4	21		14.2857	38.0952	28.5714	19.0476
02_S. peruvianum			8.83346																17.9764	29.3595	25.0581	27.606
02_S. peruvianum			9.82733																7.23779	9.64807	7.27516	4.84816
02_S. peruvianum			30.7145
02_S. peruvianum			33.9013								10_"Ailsa Craig"	1	0	4	5	5	14		0	28.5714	35.7143	35.7143
02_S. peruvianum	7	33.5587	2.47893	8.38968	16.7794	25.169	33.5587				10_"Ailsa Craig"	2	1	4	4	7	16		6.25	25	25	43.75
02_S. peruvianum			3.2673	2	8	4	1	15			10_"Ailsa Craig"	3	0	3	4	6	13		0	23.0769	30.7692	46.1538
02_S. peruvianum			8.42767								10_"Ailsa Craig"	4	0	1	2	5	8		0	12.5	25	62.5
02_S. peruvianum			9.86587								10_"Ailsa Craig"	5	0	6	6	3	15		0	40	40	20
02_S. peruvianum			10.6374								10_"Ailsa Craig"	6	0	4	7	4	15		0	26.6667	46.6667	26.6667
02_S. peruvianum			10.8795								10_"Ailsa Craig"	7	0	5	8	1	14		0	35.7143	57.1429	7.14286
02_S. peruvianum			12.5071								10_"Ailsa Craig"	8	0	4	5	4	13		0	30.7692	38.4615	30.7692
02_S. peruvianum			12.6879								10_"Ailsa Craig"	9	1	2	2	4	9		11.1111	22.2222	22.2222	44.4444
02_S. peruvianum			15.1635								10_"Ailsa Craig"	10	0	3	3	5	11		0	27.2727	27.2727	45.4545
02_S. peruvianum			16.0522								10_"Ailsa Craig"	11	1	7	1	4	13		7.69231	53.8462	7.69231	30.7692
02_S. peruvianum			19.3426								10_"Ailsa Craig"	13	0	5	4	6	15		0	33.3333	26.6667	40
02_S. peruvianum			20.6581								10_"Ailsa Craig"	14	0	5	6	4	15		0	33.3333	40	26.6667
02_S. peruvianum			22.3097								10_"Ailsa Craig"	15	0	2	3	7	12		0	16.6667	25	58.3333
02_S. peruvianum			24.5736								10_"Ailsa Craig"	16	1	3	3	4	11		9.09091	27.2727	27.2727	36.3636
02_S. peruvianum			29.4226								10_"Ailsa Craig"	18	0	1	5	6	12		0	8.33333	41.6667	50
02_S. peruvianum	8	18.7377	1.03937	4.68444	9.36887	14.0533	18.7377				10_"Ailsa Craig"	19	0	4	5	3	12		0	33.3333	41.6667	25
02_S. peruvianum			2.5254	3	5	2	1	11			10_"Ailsa Craig"	20	0	4	2	5	11		0	36.3636	18.1818	45.4545
02_S. peruvianum			3.48101								10_"Ailsa Craig"	21	0	4	6	5	15		0	26.6667	40	33.3333
02_S. peruvianum			5.66372								10_"Ailsa Craig"	22	2	3	3	2	10		20	30	30	20
02_S. peruvianum			6.41548																2.70722	28.5471	32.3198	36.4258
02_S. peruvianum			7.41891																5.41807	9.89293	11.1985	13.6201
02_S. peruvianum			8.51307
02_S. peruvianum			9.04976								11_"Craigella"	2	3	9	4	2	18		16.6667	50	22.2222	11.1111
02_S. peruvianum			10.48								11_"Craigella"	12	4	6	3	4	17		23.5294	35.2941	17.6471	23.5294
02_S. peruvianum			11.4419								11_"Craigella"	13	3	3	3	5	14		21.4286	21.4286	21.4286	35.7143
02_S. peruvianum			14.0508								11_"Craigella"	14	1	4	5	3	13		7.69231	30.7692	38.4615	23.0769
02_S. peruvianum	9	30.8662	0.80354	7.71656	15.4331	23.1497	30.8662				11_"Craigella"	15	0	2	2	5	9		0	22.2222	22.2222	55.5556
02_S. peruvianum			3.28083	6	3	2	1	12			11_"Craigella"	16	3	3	5	4	15		20	20	33.3333	26.6667
02_S. peruvianum			4.28495								11_"Craigella"	17	1	2	4	2	9		11.1111	22.2222	44.4444	22.2222
02_S. peruvianum			5.20626								11_"Craigella"	18	0	1	6	7	14		0	7.14286	42.8571	50
02_S. peruvianum			6.5607								11_"Craigella"	19	0	2	5	3	10		0	20	50	30
02_S. peruvianum			7.68916								11_"Craigella"	24	2	6	4	4	16		12.5	37.5	25	25
02_S. peruvianum			10.6481								11_"Craigella"	27	2	3	3	3	11		18.1818	27.2727	27.2727	27.2727
02_S. peruvianum			11.0152								11_"Craigella"	28	0	3	3	3	9		0	33.3333	33.3333	33.3333
02_S. peruvianum			14.5029								11_"Craigella"	2	0	5	5	4	14		0	35.7143	35.7143	28.5714
02_S. peruvianum			20.1943								11_"Craigella"	3	2	5	6	5	18		11.1111	27.7778	33.3333	27.7778
02_S. peruvianum			21.8793								11_"Craigella"	4	1	4	4	5	14		7.14286	28.5714	28.5714	35.7143
02_S. peruvianum			23.2984								11_"Craigella"	6	0	4	4	6	14		0	28.5714	28.5714	42.8571
02_S. peruvianum	10	24.9607	1.61897	6.24017	12.4803	18.7205	24.9607				11_"Craigella"	8	0	2	4	4	10		0	20	40	40
02_S. peruvianum			2.38821	6	6	1	1	14			11_"Craigella"	9	0	2	3	4	9		0	22.2222	33.3333	44.4444
02_S. peruvianum			3.45599								11_"Craigella"	11	1	3	3	3	10		10	30	30	30
02_S. peruvianum			3.8868								11_"Craigella"	13	1	5	2	3	11		9.09091	45.4545	18.1818	27.2727
02_S. peruvianum			4.54455								11_"Craigella"	14	0	3	4	5	12		0	25	33.3333	41.6667
02_S. peruvianum			5.0311								11_"Craigella"	15	0	4	4	5	13		0	30.7692	30.7692	38.4615
02_S. peruvianum			6.48351								11_"Craigella"	16	0	3	5	3	11		0	27.2727	45.4545	27.2727
02_S. peruvianum			6.82755								11_"Craigella"	17	0	2	6	5	13		0	15.3846	46.1538	38.4615
02_S. peruvianum			9.16629								11_"Craigella"	18	0	3	6	4	13		0	23.0769	46.1538	30.7692
02_S. peruvianum			10.2301								11_"Craigella"	20	0	2	4	5	11		0	18.1818	36.3636	45.4545
02_S. peruvianum			12.2512								11_"Craigella"	21	0	2	4	5	11		0	18.1818	36.3636	45.4545
02_S. peruvianum			12.3858								11_"Craigella"	22	0	3	3	5	11		0	27.2727	27.2727	45.4545
02_S. peruvianum			15.9447								11_"Craigella"	25	4	2	5	6	17		23.5294	11.7647	29.4118	35.2941
02_S. peruvianum			21.4305								11_"Craigella"	28	0	3	4	6	13		0	23.0769	30.7692	46.1538
02_S. peruvianum	11	29.0206	2.96152	7.25515	14.5103	21.7655	29.0206												6.39947	26.1826	32.9325	34.4854
02_S. peruvianum			3.49261	5	2	4	2	13											8.39172	9.07053	8.60976	9.92691
02_S. peruvianum			4.57556
02_S. peruvianum			5.50412								12_"Moneymaker"	1	0	4	3	3	10		0	40	30	30
02_S. peruvianum			6.33143								12_"Moneymaker"	2	3	6	3	1	13		23.0769	46.1538	23.0769	7.69231
02_S. peruvianum			9.27711								12_"Moneymaker"	3	3	6	3	1	13		23.0769	46.1538	23.0769	7.69231
02_S. peruvianum			13.9556								12_"Moneymaker"	4	5	7	4	3	19		26.3158	36.8421	21.0526	15.7895
02_S. peruvianum			15.7217								12_"Moneymaker"	5	5	2	0	1	8		62.5	25	0	12.5
02_S. peruvianum			16.7393								12_"Moneymaker"	6	2	7	3	2	14		14.2857	50	21.4286	14.2857
02_S. peruvianum			18.3223								12_"Moneymaker"	7	0	5	5	1	11		0	45.4545	45.4545	9.09091
02_S. peruvianum			19.2724								12_"Moneymaker"	8	0	1	3	3	7		0	14.2857	42.8571	42.8571
02_S. peruvianum			22.5201								12_"Moneymaker"	9	3	4	2	2	11		27.2727	36.3636	18.1818	18.1818
02_S. peruvianum			23.0219																19.6142	37.806	25.0143	17.5655
02_S. peruvianum	12	21.6844	0.693689	5.4211	10.8422	16.2633	21.6844												19.8409	11.5736	13.5531	11.7314
02_S. peruvianum			0.947689	6	3	4	1	14
02_S. peruvianum			1.77828								13_"M82"	1	3	4	5	7	19		15.7895	21.0526	26.3158	36.8421
02_S. peruvianum			3.18315								13_"M82"	2	1	3	3	5	12		8.33333	25	25	41.6667
02_S. peruvianum			4.33865								13_"M82"	3	3	5	3	6	17		17.6471	29.4118	17.6471	35.2941
02_S. peruvianum			4.69458								13_"M82"	4	4	4	1	4	13		30.7692	30.7692	7.69231	30.7692
02_S. peruvianum			6.01965								13_"M82"	5	3	2	5	5	15		20	13.3333	33.3333	33.3333
02_S. peruvianum			7.51824								13_"M82"	6	7	4	1	5	17		41.1765	23.5294	5.88235	29.4118
02_S. peruvianum			7.84315								13_"M82"	7	5	2	3	4	14		35.7143	14.2857	21.4286	28.5714
02_S. peruvianum			11.5439								13_"M82"	9	0	0	3	2	5		0	0	60	40
02_S. peruvianum			11.7055								13_"M82"	10	0	2	2	3	7		0	28.5714	28.5714	42.8571
02_S. peruvianum			13.9251								13_"M82"	11	0	2	3	4	9		0	22.2222	33.3333	44.4444
02_S. peruvianum			15.1331																16.943	20.8176	25.9204	36.319
02_S. peruvianum			16.3555																15.1924	9.3805	15.2817	5.77052
02_S. peruvianum	13	26.9199	0.769244	6.72996	13.4599	20.1899	26.9199
02_S. peruvianum			1.64766	6	3	2	2	13			14_"Micro-Tom"	2	4	8	6	5	23		17.3913	34.7826	26.087	21.7391
02_S. peruvianum			2.7824								14_"Micro-Tom"	3	5	9	9	8	31		16.129	29.0323	29.0323	25.8065
02_S. peruvianum			4.26746								14_"Micro-Tom"	5	8	10	11	6	35		22.8571	28.5714	31.4286	17.1429
02_S. peruvianum			4.97535								14_"Micro-Tom"	8	3	5	10	6	24		12.5	20.8333	41.6667	25
02_S. peruvianum			6.23279								14_"Micro-Tom"	9	1	12	10	5	28		3.57143	42.8571	35.7143	17.8571
02_S. peruvianum			7.6136								14_"Micro-Tom"	10	8	10	6	2	26		30.7692	38.4615	23.0769	7.69231
02_S. peruvianum			10.1054								14_"Micro-Tom"	11	10	10	7	7	34		29.4118	29.4118	20.5882	20.5882
02_S. peruvianum			11.4846								14_"Micro-Tom"	12	6	9	9	5	29		20.6897	31.0345	31.0345	17.2414
02_S. peruvianum			14.6219								14_"Micro-Tom"	13	5	6	6	5	22		22.7273	27.2727	27.2727	22.7273
02_S. peruvianum			17.7626								14_"Micro-Tom"	15	2	5	7	5	19		10.5263	26.3158	36.8421	26.3158
02_S. peruvianum			22.2048								14_"Micro-Tom"	18	7	8	7	5	27		25.9259	29.6296	25.9259	18.5185
02_S. peruvianum			24.8113								14_"Micro-Tom"	20	0	6	6	4	16		0	37.5	37.5	25
02_S. peruvianum	14	18.38	1.33135	4.595	9.19001	13.785	18.38												17.7083	31.3086	30.5141	20.4691
02_S. peruvianum			1.6467	4	3	2	0	9											9.67853	6.06817	6.3858	5.27267
02_S. peruvianum			2.83882
02_S. peruvianum			4.45383								15_anthocyanin absent	1	0	1	2	3	6		0	16.6667	33.3333	50
02_S. peruvianum			5.78121								15_anthocyanin absent	5	0	0	2	3	5		0	0	40	60
02_S. peruvianum			6.74871								15_anthocyanin absent	6	0	0	3	3	6		0	0	50	50
02_S. peruvianum			8.02924								15_anthocyanin absent	8	0	0	1	4	5		0	0	20	80
02_S. peruvianum			10.0051								15_anthocyanin absent	11	0	1	2	3	6		0	16.6667	33.3333	50
02_S. peruvianum			11.8939								15_anthocyanin absent	12	0	0	1	4	5		0	0	20	80
02_S. peruvianum	18	12.83	1.30526	3.2075	6.415	9.62249	12.83				15_anthocyanin absent	13	0	0	2	3	5		0	0	40	60
02_S. peruvianum			2.4113	2	2	1	1	6			15_anthocyanin absent	14	0	1	1	4	6		0	16.6667	16.6667	66.6667
02_S. peruvianum			3.2475								15_anthocyanin absent	16	0	2	3	2	7		0	28.5714	42.8571	28.5714
02_S. peruvianum			4.55179								15_anthocyanin absent	17	0	0	0	4	4		0	0	0	100
02_S. peruvianum			8.66118								15_anthocyanin absent	18	0	1	1	3	5		0	20	20	60
02_S. peruvianum			10.5605																0	8.96104	28.7446	62.2944
02_S. peruvianum	20	12.9909	1.19541	3.24774	6.49547	9.74321	12.9909												0	10.7998	14.656	19.1684
02_S. peruvianum			2.33343	2	3	1	0	6
02_S. peruvianum			3.30092								16_anthocyaninless	1	0	6	13	8	27		0	22.2222	48.1481	29.6296
02_S. peruvianum			3.69907								16_anthocyaninless	2	0	6	8	6	20		0	30	40	30
02_S. peruvianum			6.07936								16_anthocyaninless	3	1	9	10	8	28		3.57143	32.1429	35.7143	28.5714
02_S. peruvianum			8.58958								16_anthocyaninless	4	0	8	14	9	31		0	25.8065	45.1613	29.0323
03_S. chilense	1	49.9143	2.56009	12.4786	24.9572	37.4358	49.9143				16_anthocyaninless	5	0	9	11	12	32		0	28.125	34.375	37.5
03_S. chilense			2.80056	2	8	1	1	12			16_anthocyaninless	7	0	9	14	9	32		0	28.125	43.75	28.125
03_S. chilense			13.0252								16_anthocyaninless	8	0	7	9	6	22		0	31.8182	40.9091	27.2727
03_S. chilense			14.6426								16_anthocyaninless	9	0	4	7	8	19		0	21.0526	36.8421	42.1053
03_S. chilense			15.0407								16_anthocyaninless	10	0	5	11	9	25		0	20	44	36
03_S. chilense			16.6643								16_anthocyaninless	11	0	1	10	10	21		0	4.7619	47.619	47.619
03_S. chilense			18.6306								16_anthocyaninless	12	0	7	11	8	26		0	26.9231	42.3077	30.7692
03_S. chilense			20.1381								16_anthocyaninless	13	0	6	9	6	21		0	28.5714	42.8571	28.5714
03_S. chilense			21.9434								16_anthocyaninless	14	2	7	13	8	30		6.66667	23.3333	43.3333	26.6667
03_S. chilense			22.9333								16_anthocyaninless	17	0	5	8	7	20		0	25	40	35
03_S. chilense			32.0058								16_anthocyaninless	18	0	3	8	5	16		0	18.75	50	31.25
03_S. chilense			38.4911								16_anthocyaninless	20	0	1	8	9	18		0	5.55556	44.4444	50
03_S. chilense	2	42.1773	6.79257	10.5443	21.0887	31.633	42.1773												0.639881	23.2617	42.4663	33.632
03_S. chilense			9.79467	2	5	2	3	12											1.83754	8.1183	4.38921	7.26877
03_S. chilense			11.0274
03_S. chilense			13.2388								17_bushy	1	0	0	1	2	3		0	0	33.3333	66.6667
03_S. chilense			19.5254								17_bushy	3	0	3	0	4	7		0	42.8571	0	57.1429
03_S. chilense			20.4315								17_bushy	5	0	0	1	5	6		0	0	16.6667	83.3333
03_S. chilense			20.7604								17_bushy	6	0	3	4	2	9		0	33.3333	44.4444	22.2222
03_S. chilense			22.9168								17_bushy	7	0	3	4	5	12		0	25	33.3333	41.6667
03_S. chilense			27.6645								17_bushy	8	0	0	3	4	7		0	0	42.8571	57.1429
03_S. chilense			33.0855								17_bushy	9	0	0	3	6	9		0	0	33.3333	66.6667
03_S. chilense			40.5847								17_bushy	10	0	1	2	3	6		0	16.6667	33.3333	50
03_S. chilense			41.2735								17_bushy	11	0	1	2	2	5		0	20	40	40
03_S. chilense	3	33.9723	9.35566	8.49307	16.9861	25.4792	33.9723				17_bushy	12	0	0	2	2	4		0	0	50	50
03_S. chilense			11.5925	0	4	0	0	4			17_bushy	14	0	1	0	2	3		0	33.3333	0	66.6667
03_S. chilense			13.1804								17_bushy	16	0	0	0	6	6		0	0	0	100
03_S. chilense			15.5139								17_bushy	17	0	2	6	2	10		0	20	60	20
03_S. chilense	4	32.5823	3.207	8.14558	16.2912	24.4367	32.5823				17_bushy	18	0	1	1	3	5		0	20	20	60
03_S. chilense			4.352	4	3	1	0	8			17_bushy	21	0	3	6	3	12		0	25	50	25
03_S. chilense			5.783																0	15.746	30.4868	53.7672
03_S. chilense			7.049																0	14.8027	19.2588	22.1998
03_S. chilense			12.541
03_S. chilense			13.654								18_lutescent	2	0	2	8	4	14		0	14.2857	57.1429	28.5714
03_S. chilense			15.298								18_lutescent	4	0	2	6	8	16		0	12.5	37.5	50
03_S. chilense			17.645								18_lutescent	7	0	4	8	4	16		0	25	50	25
03_S. chilense	5	39.0098	12.6047	9.75245	19.5049	29.2574	39.0098				18_lutescent	9	1	2	3	5	11		9.09091	18.1818	27.2727	45.4545
03_S. chilense			13.1199	0	4	4	0	8			18_lutescent	10	0	4	3	5	12		0	33.3333	25	41.6667
03_S. chilense			16.1029								18_lutescent	13	0	1	6	7	14		0	7.14286	42.8571	50
03_S. chilense			17.7664								18_lutescent	17	0	4	5	7	16		0	25	31.25	43.75
03_S. chilense			20.9945								18_lutescent	18	0	1	5	7	13		0	7.69231	38.4615	53.8462
03_S. chilense			22.3212																1.13636	17.892	38.6855	42.2861
03_S. chilense			24.9044																3.21412	9.26763	11.0865	10.3655
03_S. chilense			28.6263
03_S. chilense	7	34.5785	6.59636	8.64463	17.2893	25.9339	34.5785				19_Never ripe	2	0	1	3	3	7		0	14.2857	42.8571	42.8571
03_S. chilense			8.71048	2	0	0	0	2			19_Never ripe	4	0	0	0	3	3		0	0	0	100
03_S. chilense	9	38.1292	2.83486	9.53231	19.0646	28.5969	38.1292				19_Never ripe	5	0	0	4	4	8		0	0	50	50
03_S. chilense			6.28089	3	1	2	0	6			19_Never ripe	6	0	1	3	5	9		0	11.1111	33.3333	55.5556
03_S. chilense			8.2066								19_Never ripe	7	0	3	4	4	11		0	27.2727	36.3636	36.3636
03_S. chilense			14.5021								19_Never ripe	9	0	1	5	2	8		0	12.5	62.5	25
03_S. chilense			21.4108								19_Never ripe	11	0	1	3	5	9		0	11.1111	33.3333	55.5556
03_S. chilense			27.8152								19_Never ripe	13	0	1	6	2	9		0	11.1111	66.6667	22.2222
03_S. chilense	10	41.3089	0.384622	10.3272	20.6545	30.9817	41.3089				19_Never ripe	14	0	4	6	3	13		0	30.7692	46.1538	23.0769
03_S. chilense			1.00179	3	3	2	2	10			19_Never ripe	16	0	0	2	1	3		0	0	66.6667	33.3333
03_S. chilense			3.09775								19_Never ripe	17	1	0	1	4	6		16.6667	0	16.6667	66.6667
03_S. chilense			18.6018								19_Never ripe	18	1	0	0	3	4		25	0	0	75
03_S. chilense			19.5135								19_Never ripe	19	1	6	4	3	14		7.14286	42.8571	28.5714	21.4286
03_S. chilense			19.875								19_Never ripe	20	1	3	6	4	14		7.14286	21.4286	42.8571	28.5714
03_S. chilense			22.7894								19_Never ripe	21	0	3	2	3	8		0	37.5	25	37.5
03_S. chilense			27.45																3.73016	14.6631	36.7313	44.8754
03_S. chilense			32.6219																7.54088	14.3883	20.9158	22.5809
03_S. chilense			36.738
03_S. chilense	11	27.7545	6.01269	6.93861	13.8772	20.8158	27.7545				20_sitiens	2	0	0	0	3	3		0	0	0	100
03_S. chilense			9.6452	1	3	2	0	6			20_sitiens	3	0	2	1	2	5		0	40	20	40
03_S. chilense			11.7227								20_sitiens	4	0	0	3	1	4		0	0	75	25
03_S. chilense			12.3095								20_sitiens	5	0	0	0	2	2		0	0	0	100
03_S. chilense			13.9539								20_sitiens	8	0	0	0	3	3		0	0	0	100
03_S. chilense			20.0856								20_sitiens	10	0	0	1	2	3		0	0	33.3333	66.6667
03_S. chilense	12	41.5076	1.17792	10.3769	20.7538	31.1307	41.5076				20_sitiens	11	0	1	3	1	5		0	20	60	20
03_S. chilense			3.12644	4	2	3	1	10			20_sitiens	12	0	0	2	4	6		0	0	33.3333	66.6667
03_S. chilense			4.86646								20_sitiens	13	1	2	2	1	6		16.6667	33.3333	33.3333	16.6667
03_S. chilense			9.71272								20_sitiens	14	0	0	1	2	3		0	0	33.3333	66.6667
03_S. chilense			13.1941								20_sitiens	16	0	0	1	2	3		0	0	33.3333	66.6667
03_S. chilense			18.6918								20_sitiens	18	0	0	0	2	2		0	0	0	100
03_S. chilense			23.5084								20_sitiens	21	0	0	1	1	2		0	0	50	50
03_S. chilense			26.815																1.28205	7.17949	28.5897	62.9487
03_S. chilense			30.6108																4.6225	14.2625	24.2465	31.1816
03_S. chilense			33.4367
03_S. chilense	13	45.5378	8.86747	11.3844	22.7689	34.1533	45.5378
03_S. chilense			11.2165	2	4	2	2	10
03_S. chilense			12.4841
03_S. chilense			13.6268
03_S. chilense			16.6128
03_S. chilense			18.7173
03_S. chilense			25.2713
03_S. chilense			26.1115
03_S. chilense			35.9106
03_S. chilense			40.4326
03_S. chilense	14	43.5329	1.99895	10.8832	21.7665	32.6497	43.5329
03_S. chilense			3.70303	6	5	3	1	15
03_S. chilense			5.79802
03_S. chilense			6.68108
03_S. chilense			7.50047
03_S. chilense			10.6474
03_S. chilense			16.1373
03_S. chilense			16.9695
03_S. chilense			17.9753
03_S. chilense			19.1546
03_S. chilense			20.2471
03_S. chilense			23.4052
03_S. chilense			25.7097
03_S. chilense			27.8112
03_S. chilense			34.3251
03_S. chilense	15	24.189	1.05522	6.04725	12.0945	18.1418	24.189
03_S. chilense			1.87064	5	0	0	0	5
03_S. chilense			4.15365
03_S. chilense			4.6943
03_S. chilense			5.53214
03_S. chilense	17	38.071	10.4649	9.51775	19.0355	28.5533	38.071
03_S. chilense			11.0748	0	5	0	0	5
03_S. chilense			12.1475
03_S. chilense			14.7251
03_S. chilense			16.5479
03_S. chilense	18	30.8107	0.712818	7.70267	15.4053	23.108	30.8107
03_S. chilense			2.11604	3	3	2	1	9
03_S. chilense			4.1404
03_S. chilense			8.63933
03_S. chilense			9.36471
03_S. chilense			13.8881
03_S. chilense			18.2291
03_S. chilense			21.6296
03_S. chilense			25.8908
03_S. chilense	19	15.2525	0.547899	3.81312	7.62625	11.4394	15.2525
03_S. chilense			1.64766	4	0	0	0	4
03_S. chilense			2.60095
03_S. chilense			3.11059
03_S. chilense	20	18.8964	1.25019	4.7241	9.44819	14.1723	18.8964
03_S. chilense			1.36565	4	0	0	0	4
03_S. chilense			2.44067
03_S. chilense			3.53483
03_S. chilense	24	22.6904	1.70669	5.67259	11.3452	17.0178	22.6904
03_S. chilense			4.06881	2	1	2	0	5
03_S. chilense			6.67768
03_S. chilense			12.7654
03_S. chilense			16.1679
04_S. huaylasense	1	36.9899	4.93545	9.24748	18.495	27.7424	36.9899
04_S. huaylasense			6.18893	3	3	1	1	8
04_S. huaylasense			8.24498
04_S. huaylasense			9.985
04_S. huaylasense			10.1235
04_S. huaylasense			16.5269
04_S. huaylasense			24.7984
04_S. huaylasense			35.8845
04_S. huaylasense	2	34.5775	1.107	8.64439	17.2888	25.9332	34.5775
04_S. huaylasense			5.21022	4	1	4	3	12
04_S. huaylasense			5.35833
04_S. huaylasense			6.52176
04_S. huaylasense			9.02447
04_S. huaylasense			17.3602
04_S. huaylasense			18.9854
04_S. huaylasense			22.6077
04_S. huaylasense			25.8104
04_S. huaylasense			29.0998
04_S. huaylasense			30.5235
04_S. huaylasense			32.855
04_S. huaylasense	3	30.31	2.61748	7.57749	15.155	22.7325	30.31
04_S. huaylasense			4.91729	4	3	1	3	11
04_S. huaylasense			5.94449
04_S. huaylasense			6.79093
04_S. huaylasense			9.76898
04_S. huaylasense			9.90356
04_S. huaylasense			14.0658
04_S. huaylasense			17.2909
04_S. huaylasense			23.9706
04_S. huaylasense			25.6246
04_S. huaylasense			28.3209
04_S. huaylasense	4	33.8825	1.25976	8.47063	16.9413	25.4119	33.8825
04_S. huaylasense			3.87395	3	3	2	2	10
04_S. huaylasense			7.57738
04_S. huaylasense			8.56401
04_S. huaylasense			9.6885
04_S. huaylasense			12.4567
04_S. huaylasense			19.3852
04_S. huaylasense			24.5984
04_S. huaylasense			29.0368
04_S. huaylasense			32.0699
04_S. huaylasense	6	23.109	6.2668	5.77725	11.5545	17.3318	23.109
04_S. huaylasense			7.16503	0	5	2	0	7
04_S. huaylasense			9.92625
04_S. huaylasense			10.1341
04_S. huaylasense			11.3103
04_S. huaylasense			12.4514
04_S. huaylasense			14.4421
04_S. huaylasense	7	35.4643	6.37694	8.86607	17.7321	26.5982	35.4643
04_S. huaylasense			7.4025	3	1	1	2	7
04_S. huaylasense			7.84847
04_S. huaylasense			12.5082
04_S. huaylasense			17.9236
04_S. huaylasense			32.2369
04_S. huaylasense			33.0309
04_S. huaylasense	9	18.7519	1.45241	4.68798	9.37595	14.0639	18.7519
04_S. huaylasense			4.20379	2	3	0	1	6
04_S. huaylasense			4.82656
04_S. huaylasense			6.70021
04_S. huaylasense			8.26015
04_S. huaylasense			14.1694
04_S. huaylasense	10	21.7013	0.671277	5.42533	10.8507	16.276	21.7013
04_S. huaylasense			1.28845	2	2	3	1	8
04_S. huaylasense			6.4148
04_S. huaylasense			7.73522
04_S. huaylasense			12.1171
04_S. huaylasense			12.8711
04_S. huaylasense			14.2935
04_S. huaylasense			16.9459
04_S. huaylasense	11	31.4273	4.85814	7.85683	15.7137	23.5705	31.4273
04_S. huaylasense			8.03704	1	2	1	0	4
04_S. huaylasense			10.2372
04_S. huaylasense			17.3658
04_S. huaylasense	13	29.0444	1.81258	7.2611	14.5222	21.7833	29.0444
04_S. huaylasense			3.35271	4	2	0	1	7
04_S. huaylasense			3.78911
04_S. huaylasense			5.75937
04_S. huaylasense			8.00111
04_S. huaylasense			12.7967
04_S. huaylasense			22.7384
04_S. huaylasense	16	15.7098	1.40158	3.92745	7.85489	11.7823	15.7098
04_S. huaylasense			2.22261	3	3	2	0	8
04_S. huaylasense			3.46884
04_S. huaylasense			4.56532
04_S. huaylasense			5.2422
04_S. huaylasense			6.95025
04_S. huaylasense			9.84549
04_S. huaylasense			11.1165
04_S. huaylasense	17	22.0935	1.34816	5.52336	11.0467	16.5701	22.0935
04_S. huaylasense			2.85891	3	2	3	0	8
04_S. huaylasense			5.31339
04_S. huaylasense			5.95202
04_S. huaylasense			6.87101
04_S. huaylasense			12.5127
04_S. huaylasense			14.612
04_S. huaylasense			16.0574
04_S. huaylasense	19	21.1067	2.64385	5.27667	10.5533	15.83	21.1067
04_S. huaylasense			4.84105	3	1	1	0	5
04_S. huaylasense			5.23128
04_S. huaylasense			6.45606
04_S. huaylasense			14.9289
04_S. huaylasense	21	21.8281	5.53021	5.45702	10.914	16.3711	21.8281
04_S. huaylasense			6.20545	0	5	2	0	7
04_S. huaylasense			7.18088
04_S. huaylasense			7.45564
04_S. huaylasense			10.4106
04_S. huaylasense			15.3473
04_S. huaylasense			15.5782
05_S. chmielewskii	1	6.01473	2.56433	1.50368	3.00736	4.51104	6.01473
05_S. chmielewskii			3.0931	0	1	1	0	2
05_S. chmielewskii	7	23.7184	2.84239	5.92961	11.8592	17.7888	23.7184
05_S. chmielewskii			9.77611	1	1	0	1	3
05_S. chmielewskii			22.0579
05_S. chmielewskii	8	8.88813	3.43018	2.22203	4.44406	6.66609	8.88813
05_S. chmielewskii			5.36614	0	1	2	0	3
05_S. chmielewskii			6.54706
05_S. chmielewskii	9	7.46685	1.98746	1.86671	3.73342	5.60014	7.46685
05_S. chmielewskii			2.93351	0	2	0	0	2
05_S. chmielewskii	11	11.5607	4.64048	2.89017	5.78034	8.6705	11.5607
05_S. chmielewskii			5.74652	0	2	2	2	6
05_S. chmielewskii			7.48654
05_S. chmielewskii			8.01763
05_S. chmielewskii			9.05769
05_S. chmielewskii			9.98296
05_S. chmielewskii	13	6.98686	1.92871	1.74672	3.49343	5.24015	6.98686
05_S. chmielewskii			2.06726	0	2	0	0	2
05_S. chmielewskii	14	6.40167	1.09416	1.60042	3.20083	4.80125	6.40167
05_S. chmielewskii			2.38657	1	2	0	0	3
05_S. chmielewskii			2.68279
06_S. arcanum	1	25.9939	11.0591	6.49847	12.9969	19.4954	25.9939
06_S. arcanum			15.3315	0	1	2	0	3
06_S. arcanum			18.9943
06_S. arcanum	2	23.5022	2.16823	5.87556	11.7511	17.6267	23.5022
06_S. arcanum			11.2498	1	1	2	2	6
06_S. arcanum			14.341
06_S. arcanum			16.3047
06_S. arcanum			20.8894
06_S. arcanum			20.9356
06_S. arcanum	3	24.439	9.92405	6.10975	12.2195	18.3292	24.439
06_S. arcanum			11.8877	0	2	1	2	5
06_S. arcanum			13.3061
06_S. arcanum			18.8247
06_S. arcanum			22.8616
06_S. arcanum	4	30.0456	4.43634	7.5114	15.0228	22.5342	30.0456
06_S. arcanum			10.9268	1	2	3	1	7
06_S. arcanum			14.8024
06_S. arcanum			16.6882
06_S. arcanum			17.0052
06_S. arcanum			19.998
06_S. arcanum			24.3849
06_S. arcanum	6	26.3691	4.7402	6.59227	13.1845	19.7768	26.3691
06_S. arcanum			9.21848	1	2	1	1	5
06_S. arcanum			11.323
06_S. arcanum			15.6344
06_S. arcanum			24.4849
06_S. arcanum	8	23.9723	1.25908	5.99306	11.9861	17.9792	23.9723
06_S. arcanum			10.3383	1	3	2	1	7
06_S. arcanum			11.4364
06_S. arcanum			11.7653
06_S. arcanum			13.7178
06_S. arcanum			17.0191
06_S. arcanum			18.7918
06_S. arcanum	9	25.7952	0.822669	6.44881	12.8976	19.3464	25.7952
06_S. arcanum			7.58807	1	4	1	0	6
06_S. arcanum			7.7728
06_S. arcanum			12.1121
06_S. arcanum			12.2276
06_S. arcanum			17.7623
06_S. arcanum	10	33.3354	1.39598	8.33386	16.6677	25.0016	33.3354
06_S. arcanum			1.96929	4	3	3	0	10
06_S. arcanum			2.71941
06_S. arcanum			4.91796
06_S. arcanum			9.93226
06_S. arcanum			13.9922
06_S. arcanum			14.3943
06_S. arcanum			18.7406
06_S. arcanum			18.9962
06_S. arcanum			23.4976
06_S. arcanum	11	20.4167	10.0775	5.10418	10.2084	15.3125	20.4167
06_S. arcanum			15.0119	0	1	2	0	3
06_S. arcanum			15.2062
06_S. arcanum	12	23.0857	2.4598	5.77142	11.5428	17.3143	23.0857
06_S. arcanum			7.04165	1	2	3	0	6
06_S. arcanum			9.71023
06_S. arcanum			12.0714
06_S. arcanum			13.0923
06_S. arcanum			17.1364
06_S. arcanum	13	23.019	1.0559	5.75474	11.5095	17.2642	23.019
06_S. arcanum			9.89468	1	1	2	0	4
06_S. arcanum			11.5598
06_S. arcanum			15.8039
06_S. arcanum	14	25.5195	12.7488	6.37988	12.7598	19.1396	25.5195
06_S. arcanum			21.383	0	1	0	1	2
06_S. arcanum	16	20.5355	11.0459	5.13388	10.2678	15.4016	20.5355	1
06_S. arcanum	19	21.7926	10.2901	5.44815	10.8963	16.3444	21.7926
06_S. arcanum			11.2193	0	1	2	0	3
06_S. arcanum			12.1367
06_S. arcanum	20	22.9616	5.81127	5.74039	11.4808	17.2212	22.9616
06_S. arcanum			9.48929	0	3	1	0	4
06_S. arcanum			10.0006
06_S. arcanum			12.1688
06_S. arcanum	21	21.1865	5.70854	5.29662	10.5932	15.8898	21.1865
06_S. arcanum			8.19772	0	3	1	1	5
06_S. arcanum			8.67074
06_S. arcanum			10.5939
06_S. arcanum			16.1722
07_S. galapagense	2	23.3464	2.80481	5.8366	11.6732	17.5098	23.3464
07_S. galapagense			2.94335	2	1	0	3	6
07_S. galapagense			7.04742
07_S. galapagense			18.5427
07_S. galapagense			19.2601
07_S. galapagense			20.7956
07_S. galapagense	4	23.9132	1.40226	5.97831	11.9566	17.9349	23.9132
07_S. galapagense			3.35503	3	0	2	1	6
07_S. galapagense			3.43386
07_S. galapagense			12.0717
07_S. galapagense			14.607
07_S. galapagense			20.6476
07_S. galapagense	5	23.3774	1.80465	5.84434	11.6887	17.533	23.3774
07_S. galapagense			2.61284	2	3	0	2	7
07_S. galapagense			7.9045
07_S. galapagense			9.61979
07_S. galapagense			10.1103
07_S. galapagense			18.1797
07_S. galapagense			18.9658
07_S. galapagense	6	18.9745	1.41019	4.74362	9.48725	14.2309	18.9745
07_S. galapagense			2.7052	2	1	3	2	8
07_S. galapagense			6.99643
07_S. galapagense			9.67129
07_S. galapagense			10.9175
07_S. galapagense			13.915
07_S. galapagense			15.0306
07_S. galapagense			15.6478
07_S. galapagense	7	20.3792	0.602005	5.0948	10.1896	15.2844	20.3792
07_S. galapagense			1.80998	4	1	2	0	7
07_S. galapagense			1.99074
07_S. galapagense			2.63893
07_S. galapagense			5.71494
07_S. galapagense			12.7652
07_S. galapagense			14.8061
07_S. galapagense	8	21.4583	5.58352	5.36459	10.7292	16.0938	21.4583
07_S. galapagense			9.44627	0	2	1	1	4
07_S. galapagense			14.5091
07_S. galapagense			18.7987
07_S. galapagense	9	21.7563	4.30408	5.43908	10.8782	16.3172	21.7563
07_S. galapagense			4.41557	2	1	2	2	7
07_S. galapagense			9.66869
07_S. galapagense			14.6622
07_S. galapagense			15.2292
07_S. galapagense			16.8585
07_S. galapagense			18.9574
07_S. galapagense	11	21.2714	6.03289	5.31785	10.6357	15.9536	21.2714
07_S. galapagense			6.55374	0	2	2	0	4
07_S. galapagense			12.8826
07_S. galapagense			15.9404
07_S. galapagense	12	22.014	2.0689	5.5035	11.007	16.5105	22.014
07_S. galapagense			8.05301	1	3	0	1	5
07_S. galapagense			9.35498
07_S. galapagense			10.7421
07_S. galapagense			16.9443
07_S. galapagense	13	27.0733	9.21468	6.76832	13.5366	20.305	27.0733
07_S. galapagense			9.41457	0	2	2	3	7
07_S. galapagense			15.143
07_S. galapagense			20.0442
07_S. galapagense			22.8336
07_S. galapagense			24.5274
07_S. galapagense			26.0468
08_S. cheesmaniae	2	23.5025	3.76014	5.87563	11.7513	17.6269	23.5025
08_S. cheesmaniae			4.69266	2	3	1	2	8
08_S. cheesmaniae			8.12624
08_S. cheesmaniae			10.6177
08_S. cheesmaniae			10.8638
08_S. cheesmaniae			16.5277
08_S. cheesmaniae			17.5103
08_S. cheesmaniae			20.1535
08_S. cheesmaniae	3	22.6132	6.3689	5.65329	11.3066	16.9599	22.6132
08_S. cheesmaniae			6.8881	0	2	2	0	4
08_S. cheesmaniae			13.2225
08_S. cheesmaniae			16.3902
08_S. cheesmaniae	4	20.8466	3.30296	5.21165	10.4233	15.635	20.8466
08_S. cheesmaniae			3.9297	2	2	1	1	6
08_S. cheesmaniae			8.27175
08_S. cheesmaniae			9.4319
08_S. cheesmaniae			11.038
08_S. cheesmaniae			16.5386
08_S. cheesmaniae	5	23.3155	5.7785	5.82887	11.6577	17.4866	23.3155
08_S. cheesmaniae			6.58764	1	5	0	0	6
08_S. cheesmaniae			7.63001
08_S. cheesmaniae			8.68823
08_S. cheesmaniae			10.1017
08_S. cheesmaniae			11.4643
08_S. cheesmaniae	6	20.286	4.92713	5.07151	10.143	15.2145	20.286
08_S. cheesmaniae			5.97907	1	1	0	0	2
08_S. cheesmaniae	7	24.9965	11.0487	6.24913	12.4983	18.7474	24.9965
08_S. cheesmaniae			17.1913	0	1	2	0	3
08_S. cheesmaniae			17.4549
08_S. cheesmaniae	8	10.1107	4.50657	2.52768	5.05535	7.58303	10.1107
08_S. cheesmaniae			5.45494	0	1	1	0	2
08_S. cheesmaniae	9	15.0803	6.83807	3.77008	7.54017	11.3103	15.0803
08_S. cheesmaniae			8.66322	0	1	1	1	3
08_S. cheesmaniae			12.3993
08_S. cheesmaniae	12	12.5896	5.74256	3.14741	6.29482	9.44222	12.5896	1
08_S. cheesmaniae	14	22.2939	8.18787	5.57347	11.1469	16.7204	22.2939
08_S. cheesmaniae			8.82978	0	3	3	0	6
08_S. cheesmaniae			10.9439
08_S. cheesmaniae			13.371
08_S. cheesmaniae			14.4134
08_S. cheesmaniae			16.2346
09_S. pimpinelifollium	1	42.6825	1.15947	10.6706	21.3413	32.0119	42.6825
09_S. pimpinelifollium			2.4169	5	3	8	1	17
09_S. pimpinelifollium			5.51997
09_S. pimpinelifollium			5.73339
09_S. pimpinelifollium			10.0081
09_S. pimpinelifollium			11.1907
09_S. pimpinelifollium			15.149
09_S. pimpinelifollium			19.6801
09_S. pimpinelifollium			22.4678
09_S. pimpinelifollium			23.3525
09_S. pimpinelifollium			24.8369
09_S. pimpinelifollium			25.7925
09_S. pimpinelifollium			26.4479
09_S. pimpinelifollium			28.0032
09_S. pimpinelifollium			29.0591
09_S. pimpinelifollium			32.0005
09_S. pimpinelifollium			34.1067
09_S. pimpinelifollium	2	36.4687	0.493794	9.11717	18.2343	27.3515	36.4687
09_S. pimpinelifollium			0.872813	4	5	2	2	13
09_S. pimpinelifollium			3.14421
09_S. pimpinelifollium			5.53078
09_S. pimpinelifollium			9.65148
09_S. pimpinelifollium			11.4631
09_S. pimpinelifollium			14.3583
09_S. pimpinelifollium			16.1881
09_S. pimpinelifollium			18.2043
09_S. pimpinelifollium			23.6395
09_S. pimpinelifollium			24.5777
09_S. pimpinelifollium			27.9387
09_S. pimpinelifollium			29.2924
09_S. pimpinelifollium	3	36.4872	1.05754	9.12181	18.2436	27.3654	36.4872
09_S. pimpinelifollium			2.03624	4	3	4	3	14
09_S. pimpinelifollium			2.9249
09_S. pimpinelifollium			5.11322
09_S. pimpinelifollium			10.6143
09_S. pimpinelifollium			13.7546
09_S. pimpinelifollium			17.7749
09_S. pimpinelifollium			19.0284
09_S. pimpinelifollium			24.5153
09_S. pimpinelifollium			24.8498
09_S. pimpinelifollium			26.5077
09_S. pimpinelifollium			30.0355
09_S. pimpinelifollium			31.414
09_S. pimpinelifollium			33.4895
09_S. pimpinelifollium	4	34.6589	1.28845	8.66473	17.3295	25.9942	34.6589
09_S. pimpinelifollium			1.83867	4	2	6	2	14
09_S. pimpinelifollium			4.814
09_S. pimpinelifollium			7.25795
09_S. pimpinelifollium			10.8241
09_S. pimpinelifollium			15.0189
09_S. pimpinelifollium			17.4615
09_S. pimpinelifollium			19.8329
09_S. pimpinelifollium			21.3459
09_S. pimpinelifollium			22.7132
09_S. pimpinelifollium			24.6967
09_S. pimpinelifollium			25.9875
09_S. pimpinelifollium			26.7409
09_S. pimpinelifollium			29.5319
09_S. pimpinelifollium	5	39.2115	1.18584	9.80287	19.6057	29.4086	39.2115
09_S. pimpinelifollium			1.91122	3	3	3	3	12
09_S. pimpinelifollium			2.79756
09_S. pimpinelifollium			10.0405
09_S. pimpinelifollium			12.149
09_S. pimpinelifollium			15.729
09_S. pimpinelifollium			21.9536
09_S. pimpinelifollium			26.5084
09_S. pimpinelifollium			28.1663
09_S. pimpinelifollium			30.0848
09_S. pimpinelifollium			30.6485
09_S. pimpinelifollium			35.8607
09_S. pimpinelifollium	6	40.8224	4.53362	10.2056	20.4112	30.6168	40.8224
09_S. pimpinelifollium			4.84105	5	5	5	3	18
09_S. pimpinelifollium			6.3723
09_S. pimpinelifollium			7.49583
09_S. pimpinelifollium			7.96489
09_S. pimpinelifollium			11.2448
09_S. pimpinelifollium			16.294
09_S. pimpinelifollium			16.8442
09_S. pimpinelifollium			18.9831
09_S. pimpinelifollium			20.3026
09_S. pimpinelifollium			20.8218
09_S. pimpinelifollium			25.1664
09_S. pimpinelifollium			25.8473
09_S. pimpinelifollium			26.6554
09_S. pimpinelifollium			29.9069
09_S. pimpinelifollium			31.2821
09_S. pimpinelifollium			32.7642
09_S. pimpinelifollium			35.565
09_S. pimpinelifollium	7	31.298	0.853684	7.8245	15.649	23.4735	31.298
09_S. pimpinelifollium			1.33627	4	2	5	3	14
09_S. pimpinelifollium			3.96167
09_S. pimpinelifollium			7.1854
09_S. pimpinelifollium			11.184
09_S. pimpinelifollium			14.7567
09_S. pimpinelifollium			16.5804
09_S. pimpinelifollium			19.0541
09_S. pimpinelifollium			19.3542
09_S. pimpinelifollium			20.7096
09_S. pimpinelifollium			23.0118
09_S. pimpinelifollium			24.039
09_S. pimpinelifollium			24.9547
09_S. pimpinelifollium			26.6763
09_S. pimpinelifollium	8	31.1529	1.1014	7.78822	15.5764	23.3647	31.1529
09_S. pimpinelifollium			1.79413	5	3	3	3	14
09_S. pimpinelifollium			3.17426
09_S. pimpinelifollium			4.65236
09_S. pimpinelifollium			7.06666
09_S. pimpinelifollium			8.9634
09_S. pimpinelifollium			10.0058
09_S. pimpinelifollium			13.7527
09_S. pimpinelifollium			17.9479
09_S. pimpinelifollium			19.2475
09_S. pimpinelifollium			23.194
09_S. pimpinelifollium			24.6959
09_S. pimpinelifollium			28.2755
09_S. pimpinelifollium			30.0683
09_S. pimpinelifollium	9	34.4032	0.721421	8.60081	17.2016	25.8024	34.4032
09_S. pimpinelifollium			2.87476	4	6	4	4	18
09_S. pimpinelifollium			7.33227
09_S. pimpinelifollium			8.10547
09_S. pimpinelifollium			10.144
09_S. pimpinelifollium			12.5138
09_S. pimpinelifollium			12.8061
09_S. pimpinelifollium			13.8389
09_S. pimpinelifollium			13.987
09_S. pimpinelifollium			17.0187
09_S. pimpinelifollium			18.9689
09_S. pimpinelifollium			22.0356
09_S. pimpinelifollium			23.262
09_S. pimpinelifollium			24.1698
09_S. pimpinelifollium			25.9726
09_S. pimpinelifollium			27.832
09_S. pimpinelifollium			30.7807
09_S. pimpinelifollium			31.636
09_S. pimpinelifollium	10	31.5222	0.580555	7.88055	15.7611	23.6416	31.5222
09_S. pimpinelifollium			2.18532	3	3	6	0	12
09_S. pimpinelifollium			7.0713
09_S. pimpinelifollium			7.88509
09_S. pimpinelifollium			9.23257
09_S. pimpinelifollium			13.1708
09_S. pimpinelifollium			16.8118
09_S. pimpinelifollium			17.894
09_S. pimpinelifollium			18.723
09_S. pimpinelifollium			20.2024
09_S. pimpinelifollium			22.7226
09_S. pimpinelifollium			22.8572
09_S. pimpinelifollium	11	36.9067	0.617172	9.22668	18.4534	27.68	36.9067
09_S. pimpinelifollium			2.00591	6	4	4	4	18
09_S. pimpinelifollium			3.43454
09_S. pimpinelifollium			5.73503
09_S. pimpinelifollium			6.71045
09_S. pimpinelifollium			8.18991
09_S. pimpinelifollium			9.47044
09_S. pimpinelifollium			12.1364
09_S. pimpinelifollium			14.4161
09_S. pimpinelifollium			18.017
09_S. pimpinelifollium			19.2615
09_S. pimpinelifollium			19.8962
09_S. pimpinelifollium			25.8222
09_S. pimpinelifollium			27.653
09_S. pimpinelifollium			28.0337
09_S. pimpinelifollium			30.2497
09_S. pimpinelifollium			31.7236
09_S. pimpinelifollium			33.8218
09_S. pimpinelifollium	13	36.6898	1.8578	9.17246	18.3449	27.5174	36.6898
09_S. pimpinelifollium			3.73733	3	4	4	5	16
09_S. pimpinelifollium			8.15154
09_S. pimpinelifollium			11.7708
09_S. pimpinelifollium			13.9159
09_S. pimpinelifollium			15.3142
09_S. pimpinelifollium			17.3475
09_S. pimpinelifollium			19.3289
09_S. pimpinelifollium			22.3353
09_S. pimpinelifollium			23.1754
09_S. pimpinelifollium			24.4807
09_S. pimpinelifollium			28.4621
09_S. pimpinelifollium			30.6395
09_S. pimpinelifollium			31.8276
09_S. pimpinelifollium			33.062
09_S. pimpinelifollium			34.9237
09_S. pimpinelifollium	14	37.6799	0.48655	9.41997	18.8399	28.2599	37.6799
09_S. pimpinelifollium			1.95973	4	6	4	3	17
09_S. pimpinelifollium			4.51121
09_S. pimpinelifollium			7.70364
09_S. pimpinelifollium			9.78375
09_S. pimpinelifollium			11.0484
09_S. pimpinelifollium			11.6584
09_S. pimpinelifollium			14.9269
09_S. pimpinelifollium			15.204
09_S. pimpinelifollium			18.1133
09_S. pimpinelifollium			20.582
09_S. pimpinelifollium			24.7989
09_S. pimpinelifollium			25.0968
09_S. pimpinelifollium			27.965
09_S. pimpinelifollium			29.7384
09_S. pimpinelifollium			33.1195
09_S. pimpinelifollium			33.7502
09_S. pimpinelifollium	18	36.5636	1.06314	9.1409	18.2818	27.4227	36.5636
09_S. pimpinelifollium			2.03064	5	6	5	2	18
09_S. pimpinelifollium			4.07645
09_S. pimpinelifollium			6.47722
09_S. pimpinelifollium			7.862
09_S. pimpinelifollium			9.27779
09_S. pimpinelifollium			11.5512
09_S. pimpinelifollium			12.2862
09_S. pimpinelifollium			14.461
09_S. pimpinelifollium			15.7009
09_S. pimpinelifollium			17.7516
09_S. pimpinelifollium			19.9792
09_S. pimpinelifollium			22.9186
09_S. pimpinelifollium			24.5431
09_S. pimpinelifollium			25.9368
09_S. pimpinelifollium			26.737
09_S. pimpinelifollium			30.8847
09_S. pimpinelifollium			31.4079
09_S. pimpinelifollium	19	39.6573	0.970779	9.91433	19.8287	29.743	39.6573
09_S. pimpinelifollium			1.81722	5	6	4	4	19
09_S. pimpinelifollium			3.63048
09_S. pimpinelifollium			5.37446
09_S. pimpinelifollium			6.86909
09_S. pimpinelifollium			10.5807
09_S. pimpinelifollium			11.7577
09_S. pimpinelifollium			14.2455
09_S. pimpinelifollium			15.209
09_S. pimpinelifollium			18.8689
09_S. pimpinelifollium			19.5108
09_S. pimpinelifollium			20.6742
09_S. pimpinelifollium			22.5607
09_S. pimpinelifollium			25.9013
09_S. pimpinelifollium			26.2014
09_S. pimpinelifollium			31.3846
09_S. pimpinelifollium			34.2528
09_S. pimpinelifollium			35.851
09_S. pimpinelifollium			37.9038
09_S. pimpinelifollium	20	40.9959	1.38177	10.249	20.498	30.7469	40.9959
09_S. pimpinelifollium			1.96861	6	3	4	4	17
09_S. pimpinelifollium			3.72544
09_S. pimpinelifollium			5.34113
09_S. pimpinelifollium			6.31259
09_S. pimpinelifollium			8.51907
09_S. pimpinelifollium			10.3848
09_S. pimpinelifollium			14.2881
09_S. pimpinelifollium			18.7891
09_S. pimpinelifollium			21.0341
09_S. pimpinelifollium			27.8343
09_S. pimpinelifollium			28.0573
09_S. pimpinelifollium			30.0583
09_S. pimpinelifollium			32.5316
09_S. pimpinelifollium			32.6471
09_S. pimpinelifollium			37.6481
09_S. pimpinelifollium			38.6466
09_S. pimpinelifollium	21	38.4393	1.30294	9.60982	19.2196	28.8294	38.4393
09_S. pimpinelifollium			3.95075	5	3	5	3	16
09_S. pimpinelifollium			6.07375
09_S. pimpinelifollium			7.78972
09_S. pimpinelifollium			8.56293
09_S. pimpinelifollium			11.2543
09_S. pimpinelifollium			12.5659
09_S. pimpinelifollium			16.7723
09_S. pimpinelifollium			19.363
09_S. pimpinelifollium			21.7106
09_S. pimpinelifollium			23.3151
09_S. pimpinelifollium			24.4514
09_S. pimpinelifollium			25.5941
09_S. pimpinelifollium			30.4134
09_S. pimpinelifollium			31.2513
09_S. pimpinelifollium			34.1484
09_S. pimpinelifollium	22	41.015	2.3255	10.2537	20.5075	30.7612	41.015
09_S. pimpinelifollium			4.60086	4	6	8	3	21
09_S. pimpinelifollium			5.1877
09_S. pimpinelifollium			7.45581
09_S. pimpinelifollium			11.2673
09_S. pimpinelifollium			13.0641
09_S. pimpinelifollium			13.1795
09_S. pimpinelifollium			15.2876
09_S. pimpinelifollium			17.5495
09_S. pimpinelifollium			19.1757
09_S. pimpinelifollium			20.9708
09_S. pimpinelifollium			21.0496
09_S. pimpinelifollium			22.4066
09_S. pimpinelifollium			24.3146
09_S. pimpinelifollium			24.9971
09_S. pimpinelifollium			26.3284
09_S. pimpinelifollium			27.2808
09_S. pimpinelifollium			30.2901
09_S. pimpinelifollium			31.1365
09_S. pimpinelifollium			32.926
09_S. pimpinelifollium			35.2146
10_"Ailsa Craig"	1	38.6137	0.796296	9.65344	19.3069	28.9603	38.6137
10_"Ailsa Craig"			1.57278	5	5	4	0	14
10_"Ailsa Craig"			3.8894
10_"Ailsa Craig"			7.26752
10_"Ailsa Craig"			8.02159
10_"Ailsa Craig"			12.1851
10_"Ailsa Craig"			12.4853
10_"Ailsa Craig"			14.3694
10_"Ailsa Craig"			14.7692
10_"Ailsa Craig"			18.4608
10_"Ailsa Craig"			20.2787
10_"Ailsa Craig"			20.567
10_"Ailsa Craig"			22.5139
10_"Ailsa Craig"			23.3603
10_"Ailsa Craig"	2	27.5316	1.1786	6.8829	13.7658	20.6487	27.5316
10_"Ailsa Craig"			1.52496	7	4	4	1	16
10_"Ailsa Craig"			3.33822
10_"Ailsa Craig"			3.50546
10_"Ailsa Craig"			4.61546
10_"Ailsa Craig"			4.98096
10_"Ailsa Craig"			5.61329
10_"Ailsa Craig"			8.55597
10_"Ailsa Craig"			9.66529
10_"Ailsa Craig"			12.9051
10_"Ailsa Craig"			13.5629
10_"Ailsa Craig"			15.3771
10_"Ailsa Craig"			15.9504
10_"Ailsa Craig"			18.4296
10_"Ailsa Craig"			19.8725
10_"Ailsa Craig"			22.5434
10_"Ailsa Craig"	3	40.6946	2.41526	10.1736	20.3473	30.5209	40.6946
10_"Ailsa Craig"			3.82081	6	4	3	0	13
10_"Ailsa Craig"			6.78233
10_"Ailsa Craig"			6.87073
10_"Ailsa Craig"			7.85572
10_"Ailsa Craig"			8.78824
10_"Ailsa Craig"			12.8834
10_"Ailsa Craig"			15.8221
10_"Ailsa Craig"			17.9731
10_"Ailsa Craig"			19.284
10_"Ailsa Craig"			21.283
10_"Ailsa Craig"			23.7391
10_"Ailsa Craig"			29.9615
10_"Ailsa Craig"	4	35.1917	2.76587	8.79791	17.5958	26.3937	35.1917
10_"Ailsa Craig"			4.27402	5	2	1	0	8
10_"Ailsa Craig"			4.32977
10_"Ailsa Craig"			5.13399
10_"Ailsa Craig"			7.96653
10_"Ailsa Craig"			14.3865
10_"Ailsa Craig"			14.5482
10_"Ailsa Craig"			18.8822
10_"Ailsa Craig"	5	39.7287	2.77351	9.93217	19.8643	29.7965	39.7287
10_"Ailsa Craig"			5.0796	3	6	6	0	15
10_"Ailsa Craig"			7.9985
10_"Ailsa Craig"			10.7452
10_"Ailsa Craig"			12.6802
10_"Ailsa Craig"			12.9725
10_"Ailsa Craig"			14.5133
10_"Ailsa Craig"			16.3025
10_"Ailsa Craig"			16.9022
10_"Ailsa Craig"			20.1936
10_"Ailsa Craig"			20.8051
10_"Ailsa Craig"			22.1566
10_"Ailsa Craig"			25.6096
10_"Ailsa Craig"			26.5381
10_"Ailsa Craig"			27.8058
10_"Ailsa Craig"	6	49.2859	0.565387	12.3215	24.643	36.9645	49.2859
10_"Ailsa Craig"			7.33159	4	7	4	0	15
10_"Ailsa Craig"			8.30633
10_"Ailsa Craig"			12.0298
10_"Ailsa Craig"			13.2642
10_"Ailsa Craig"			13.9991
10_"Ailsa Craig"			16.6842
10_"Ailsa Craig"			17.3938
10_"Ailsa Craig"			18.0555
10_"Ailsa Craig"			21.8839
10_"Ailsa Craig"			23.6134
10_"Ailsa Craig"			26.6617
10_"Ailsa Craig"			29.4065
10_"Ailsa Craig"			30.0795
10_"Ailsa Craig"			33.576
10_"Ailsa Craig"	7	44.8696	5.42296	11.2174	22.4348	33.6522	44.8696
10_"Ailsa Craig"			12.6397	1	8	5	0	14
10_"Ailsa Craig"			12.8937
10_"Ailsa Craig"			16.5752
10_"Ailsa Craig"			17.6391
10_"Ailsa Craig"			18.4871
10_"Ailsa Craig"			18.5795
10_"Ailsa Craig"			19.4316
10_"Ailsa Craig"			20.3799
10_"Ailsa Craig"			22.8252
10_"Ailsa Craig"			24.9895
10_"Ailsa Craig"			26.0725
10_"Ailsa Craig"			28.4676
10_"Ailsa Craig"			30.784
10_"Ailsa Craig"	8	34.9551	1.15387	8.73879	17.4776	26.2164	34.9551
10_"Ailsa Craig"			1.48274	4	5	4	0	13
10_"Ailsa Craig"			2.27904
10_"Ailsa Craig"			7.56934
10_"Ailsa Craig"			10.268
10_"Ailsa Craig"			11.6656
10_"Ailsa Craig"			12.9573
10_"Ailsa Craig"			14.2952
10_"Ailsa Craig"			16.6884
10_"Ailsa Craig"			19.3626
10_"Ailsa Craig"			20.6734
10_"Ailsa Craig"			21.7827
10_"Ailsa Craig"			23.182
10_"Ailsa Craig"	9	32.7274	1.67935	8.18186	16.3637	24.5456	32.7274
10_"Ailsa Craig"			3.33986	4	2	2	1	9
10_"Ailsa Craig"			4.90868
10_"Ailsa Craig"			6.20902
10_"Ailsa Craig"			8.71896
10_"Ailsa Craig"			15.3917
10_"Ailsa Craig"			19.7189
10_"Ailsa Craig"			22.0665
10_"Ailsa Craig"			25.0379
10_"Ailsa Craig"	10	22.9121	2.10852	5.72803	11.4561	17.1841	22.9121
10_"Ailsa Craig"			2.57198	5	3	3	0	11
10_"Ailsa Craig"			3.62391
10_"Ailsa Craig"			5.33988
10_"Ailsa Craig"			5.40916
10_"Ailsa Craig"			8.73945
10_"Ailsa Craig"			10.2453
10_"Ailsa Craig"			10.3472
10_"Ailsa Craig"			12.6899
10_"Ailsa Craig"			12.8149
10_"Ailsa Craig"			15.3767
10_"Ailsa Craig"	11	35.0848	0.990588	8.7712	17.5424	26.3136	35.0848
10_"Ailsa Craig"			2.40174	4	1	7	1	13
10_"Ailsa Craig"			3.71724
10_"Ailsa Craig"			6.8173
10_"Ailsa Craig"			16.0062
10_"Ailsa Craig"			18.0441
10_"Ailsa Craig"			18.2288
10_"Ailsa Craig"			20.77
10_"Ailsa Craig"			21.278
10_"Ailsa Craig"			22.1987
10_"Ailsa Craig"			24.0891
10_"Ailsa Craig"			25.1674
10_"Ailsa Craig"			26.9672
10_"Ailsa Craig"	13	23.5154	1.08295	5.87884	11.7577	17.6365	23.5154
10_"Ailsa Craig"			1.19444	6	4	5	0	15
10_"Ailsa Craig"			2.4199
10_"Ailsa Craig"			3.06973
10_"Ailsa Craig"			3.77763
10_"Ailsa Craig"			5.1083
10_"Ailsa Craig"			6.59336
10_"Ailsa Craig"			8.47029
10_"Ailsa Craig"			10.3647
10_"Ailsa Craig"			10.934
10_"Ailsa Craig"			12.4989
10_"Ailsa Craig"			13.1312
10_"Ailsa Craig"			14.9231
10_"Ailsa Craig"			15.4541
10_"Ailsa Craig"			17.4937
10_"Ailsa Craig"	14	30.4759	2.3311	7.61896	15.2379	22.8569	30.4759
10_"Ailsa Craig"			3.41174	4	6	5	0	15
10_"Ailsa Craig"			4.28059
10_"Ailsa Craig"			5.55551
10_"Ailsa Craig"			8.31646
10_"Ailsa Craig"			8.93595
10_"Ailsa Craig"			10.7881
10_"Ailsa Craig"			11.5264
10_"Ailsa Craig"			13.8803
10_"Ailsa Craig"			14.2959
10_"Ailsa Craig"			16.3473
10_"Ailsa Craig"			16.4031
10_"Ailsa Craig"			18.214
10_"Ailsa Craig"			19.266
10_"Ailsa Craig"			20.4261
10_"Ailsa Craig"	15	29.5027	1.61965	7.37567	14.7513	22.127	29.5027
10_"Ailsa Craig"			1.8235	7	3	2	0	12
10_"Ailsa Craig"			3.2132
10_"Ailsa Craig"			4.08273
10_"Ailsa Craig"			4.62271
10_"Ailsa Craig"			5.48663
10_"Ailsa Craig"			6.82059
10_"Ailsa Craig"			8.36304
10_"Ailsa Craig"			10.0658
10_"Ailsa Craig"			13.71
10_"Ailsa Craig"			17.483
10_"Ailsa Craig"			19.1937
10_"Ailsa Craig"	16	30.3794	1.13802	7.59485	15.1897	22.7846	30.3794
10_"Ailsa Craig"			2.50134	4	3	3	1	11
10_"Ailsa Craig"			3.74989
10_"Ailsa Craig"			6.53653
10_"Ailsa Craig"			11.1072
10_"Ailsa Craig"			14.5156
10_"Ailsa Craig"			14.6406
10_"Ailsa Craig"			17.3603
10_"Ailsa Craig"			18.4855
10_"Ailsa Craig"			22.0085
10_"Ailsa Craig"			23.5103
10_"Ailsa Craig"	18	21.9795	0.384622	5.49487	10.9897	16.4846	21.9795
10_"Ailsa Craig"			0.705574	6	5	1	0	12
10_"Ailsa Craig"			1.61172
10_"Ailsa Craig"			2.53468
10_"Ailsa Craig"			3.73801
10_"Ailsa Craig"			4.50329
10_"Ailsa Craig"			6.04834
10_"Ailsa Craig"			6.14071
10_"Ailsa Craig"			8.13173
10_"Ailsa Craig"			9.23477
10_"Ailsa Craig"			10.8409
10_"Ailsa Craig"			14.3137
10_"Ailsa Craig"	19	26.084	1.21453	6.521	13.042	19.563	26.084
10_"Ailsa Craig"			4.48705	3	5	4	0	12
10_"Ailsa Craig"			5.41957
10_"Ailsa Craig"			7.54121
10_"Ailsa Craig"			8.68087
10_"Ailsa Craig"			8.85207
10_"Ailsa Craig"			10.5347
10_"Ailsa Craig"			11.6559
10_"Ailsa Craig"			13.9343
10_"Ailsa Craig"			14.7131
10_"Ailsa Craig"			15.9451
10_"Ailsa Craig"			16.2684
10_"Ailsa Craig"	20	25.1455	0.749435	6.28638	12.5728	18.8592	25.1455
10_"Ailsa Craig"			2.15266	5	2	4	0	11
10_"Ailsa Craig"			2.22193
10_"Ailsa Craig"			4.3914
10_"Ailsa Craig"			5.71975
10_"Ailsa Craig"			11.2444
10_"Ailsa Craig"			12.3966
10_"Ailsa Craig"			13.6276
10_"Ailsa Craig"			16.1383
10_"Ailsa Craig"			16.2729
10_"Ailsa Craig"			17.7635
10_"Ailsa Craig"	21	29.5881	1.08063	7.39702	14.794	22.1911	29.5881
10_"Ailsa Craig"			2.35487	5	6	4	0	15
10_"Ailsa Craig"			3.08586
10_"Ailsa Craig"			6.06447
10_"Ailsa Craig"			6.20302
10_"Ailsa Craig"			8.62813
10_"Ailsa Craig"			9.33602
10_"Ailsa Craig"			9.7589
10_"Ailsa Craig"			12.0788
10_"Ailsa Craig"			14.5046
10_"Ailsa Craig"			14.6662
10_"Ailsa Craig"			15.762
10_"Ailsa Craig"			17.8435
10_"Ailsa Craig"			18.4917
10_"Ailsa Craig"			19.9737
10_"Ailsa Craig"	22	20.8842	2.22986	5.22106	10.4421	15.6632	20.8842
10_"Ailsa Craig"			4.51614	2	3	3	2	10
10_"Ailsa Craig"			6.60677
10_"Ailsa Craig"			8.07994
10_"Ailsa Craig"			9.77446
10_"Ailsa Craig"			11.7398
10_"Ailsa Craig"			12.2145
10_"Ailsa Craig"			14.8303
10_"Ailsa Craig"			15.9189
10_"Ailsa Craig"			17.7855
11_"Craigella"	2	28.4766	0.520847	7.11916	14.2383	21.3575	28.4766
11_"Craigella"	2		2.36444	2	4	9	3	18
11_"Craigella"	2		8.29744
11_"Craigella"	2		10.1807
11_"Craigella"	2		13.4216
11_"Craigella"	2		13.51
11_"Craigella"	2		14.62
11_"Craigella"	2		15.5047
11_"Craigella"	2		16.4316
11_"Craigella"	2		17.3968
11_"Craigella"	2		17.5911
11_"Craigella"	2		18.991
11_"Craigella"	2		19.1527
11_"Craigella"	2		20.5064
11_"Craigella"	2		20.7238
11_"Craigella"	2		22.2105
11_"Craigella"	2		23.7411
11_"Craigella"	2		24.0412
11_"Craigella"	12	28.4227	2.93147	7.10567	14.2113	21.317	28.4227
11_"Craigella"	12		3.8838	4	3	6	4	17
11_"Craigella"	12		4.61642
11_"Craigella"	12		6.8001
11_"Craigella"	12		8.76243
11_"Craigella"	12		10.6809
11_"Craigella"	12		12.858
11_"Craigella"	12		14.5845
11_"Craigella"	12		16.5657
11_"Craigella"	12		17.3174
11_"Craigella"	12		17.7562
11_"Craigella"	12		19.1911
11_"Craigella"	12		19.5582
11_"Craigella"	12		21.5562
11_"Craigella"	12		22.3739
11_"Craigella"	12		24.1315
11_"Craigella"	12		24.7048
11_"Craigella"	13	22.6605	1.44216	5.66512	11.3302	16.9954	22.6605
11_"Craigella"	13		2.59139	5	3	3	3	14
11_"Craigella"	13		3.5183
11_"Craigella"	13		3.88776
11_"Craigella"	13		5.29166
11_"Craigella"	13		6.15327
11_"Craigella"	13		8.06353
11_"Craigella"	13		9.84414
11_"Craigella"	13		14.2659
11_"Craigella"	13		14.9157
11_"Craigella"	13		15.0272
11_"Craigella"	13		17.6538
11_"Craigella"	13		18.6454
11_"Craigella"	13		18.8222
11_"Craigella"	14	26.9428	2.27208	6.73571	13.4714	20.2071	26.9428
11_"Craigella"	14		3.18711	3	5	4	1	13
11_"Craigella"	14		4.4373
11_"Craigella"	14		6.74599
11_"Craigella"	14		9.25458
11_"Craigella"	14		9.97928
11_"Craigella"	14		11.4756
11_"Craigella"	14		11.6468
11_"Craigella"	14		14.1089
11_"Craigella"	14		15.4913
11_"Craigella"	14		18.0108
11_"Craigella"	14		19.3725
11_"Craigella"	14		20.7764
11_"Craigella"	15	29.4036	2.53468	7.3509	14.7018	22.0527	29.4036
11_"Craigella"	15		3.35735	5	2	2	0	9
11_"Craigella"	15		4.33673
11_"Craigella"	15		4.72135
11_"Craigella"	15		7.18512
11_"Craigella"	15		9.07953
11_"Craigella"	15		13.7349
11_"Craigella"	15		16.4329
11_"Craigella"	15		20.9688
11_"Craigella"	16	17.3945	1.16903	4.34862	8.69723	13.0458	17.3945
11_"Craigella"	16		2.46869	4	5	3	3	15
11_"Craigella"	16		3.14557
11_"Craigella"	16		3.71888
11_"Craigella"	16		4.62831
11_"Craigella"	16		6.0982
11_"Craigella"	16		7.34443
11_"Craigella"	16		8.24662
11_"Craigella"	16		8.64081
11_"Craigella"	16		10.0988
11_"Craigella"	16		11.5552
11_"Craigella"	16		12.5402
11_"Craigella"	16		13.8389
11_"Craigella"	16		14.4656
11_"Craigella"	16		14.9601
11_"Craigella"	17	17.5046	3.41774	4.37615	8.7523	13.1284	17.5046
11_"Craigella"	17		4.10022	2	4	2	1	9
11_"Craigella"	17		5.09477
11_"Craigella"	17		6.05598
11_"Craigella"	17		7.87388
11_"Craigella"	17		7.98934
11_"Craigella"	17		9.66869
11_"Craigella"	17		11.9797
11_"Craigella"	17		13.9737
11_"Craigella"	18	20.7309	2.05005	5.18273	10.3655	15.5482	20.7309
11_"Craigella"	18		2.55341	7	6	1	0	14
11_"Craigella"	18		2.84567
11_"Craigella"	18		3.65317
11_"Craigella"	18		4.1318
11_"Craigella"	18		4.94722
11_"Craigella"	18		5.43541
11_"Craigella"	18		6.49527
11_"Craigella"	18		6.82019
11_"Craigella"	18		7.71281
11_"Craigella"	18		7.79165
11_"Craigella"	18		9.36115
11_"Craigella"	18		9.57853
11_"Craigella"	18		10.7308
11_"Craigella"	19	20.5029	0.853684	5.12573	10.2515	15.3772	20.5029
11_"Craigella"	19		2.96808	3	5	2	0	10
11_"Craigella"	19		3.95799
11_"Craigella"	19		5.15968
11_"Craigella"	19		6.28417
11_"Craigella"	19		8.15714
11_"Craigella"	19		8.65886
11_"Craigella"	19		9.27371
11_"Craigella"	19		10.6314
11_"Craigella"	19		10.7525
11_"Craigella"	24	18.454	0.907789	4.61351	9.22702	13.8405	18.454
11_"Craigella"	24		1.61568	4	4	6	2	16
11_"Craigella"	24		3.48141
11_"Craigella"	24		3.61599
11_"Craigella"	24		4.81604
11_"Craigella"	24		6.97074
11_"Craigella"	24		7.80365
11_"Craigella"	24		7.92471
11_"Craigella"	24		9.46387
11_"Craigella"	24		9.55228
11_"Craigella"	24		10.6352
11_"Craigella"	24		12.1704
11_"Craigella"	24		12.4261
11_"Craigella"	24		13.6842
11_"Craigella"	24		14.7671
11_"Craigella"	24		16.0054
11_"Craigella"	27	17.7508	0.625096	4.43771	8.87542	13.3131	17.7508
11_"Craigella"	27		2.885	3	3	3	2	11
11_"Craigella"	27		3.82381
11_"Craigella"	27		6.27433
11_"Craigella"	27		7.23062
11_"Craigella"	27		8.7836
11_"Craigella"	27		10.7083
11_"Craigella"	27		10.8007
11_"Craigella"	27		12.993
11_"Craigella"	27		14.4454
11_"Craigella"	27		16.89
11_"Craigella"	28	21.1252	1.97653	5.28131	10.5626	15.8439	21.1252
11_"Craigella"	28		2.40338	3	3	3	0	9
11_"Craigella"	28		4.4373
11_"Craigella"	28		5.49252
11_"Craigella"	28		5.8326
11_"Craigella"	28		9.19391
11_"Craigella"	28		10.5691
11_"Craigella"	28		11.4268
11_"Craigella"	28		13.2542
11_"Craigella"	2	25.2816	3.09506	6.32041	12.6408	18.9612	25.2816
11_"Craigella"	2		4.40895	4	5	5	0	14
11_"Craigella"	2		5.12992
11_"Craigella"	2		5.91297
11_"Craigella"	2		7.44674
11_"Craigella"	2		8.46199
11_"Craigella"	2		9.96856
11_"Craigella"	2		10.1017
11_"Craigella"	2		11.2465
11_"Craigella"	2		13.0089
11_"Craigella"	2		13.4661
11_"Craigella"	2		16.1342
11_"Craigella"	2		16.2463
11_"Craigella"	2		18.7111
11_"Craigella"	3	29.278	1.33313	7.31951	14.639	21.9585	29.278
11_"Craigella"	3		1.53197	5	6	5	2	18
11_"Craigella"	3		3.15502
11_"Craigella"	3		4.36114
11_"Craigella"	3		6.74544
11_"Craigella"	3		7.9929
11_"Craigella"	3		10.0771
11_"Craigella"	3		10.3819
11_"Craigella"	3		11.7433
11_"Craigella"	3		13.3463
11_"Craigella"	3		13.3971
11_"Craigella"	3		16.0593
11_"Craigella"	3		18.3667
11_"Craigella"	3		19.5264
11_"Craigella"	3		20.6011
11_"Craigella"	3		21.5043
11_"Craigella"	3		22.9644
11_"Craigella"	3		24.0997
11_"Craigella"	4	25.9204	1.65492	6.48009	12.9602	19.4403	25.9204
11_"Craigella"	4		1.75652	5	4	4	1	14
11_"Craigella"	4		4.03847
11_"Craigella"	4		4.57803
11_"Craigella"	4		5.80956
11_"Craigella"	4		7.49393
11_"Craigella"	4		9.31146
11_"Craigella"	4		9.59267
11_"Craigella"	4		12.4157
11_"Craigella"	4		13.0438
11_"Craigella"	4		14.2183
11_"Craigella"	4		14.9165
11_"Craigella"	4		17.75
11_"Craigella"	4		20.2849
11_"Craigella"	6	24.7448	1.38498	6.1862	12.3724	18.5586	24.7448
11_"Craigella"	6		2.44487	6	4	4	0	14
11_"Craigella"	6		3.20687
11_"Craigella"	6		4.21777
11_"Craigella"	6		4.93949
11_"Craigella"	6		5.97759
11_"Craigella"	6		7.80309
11_"Craigella"	6		9.556
11_"Craigella"	6		10.4258
11_"Craigella"	6		11.7959
11_"Craigella"	6		13.4461
11_"Craigella"	6		15.0815
11_"Craigella"	6		15.1682
11_"Craigella"	6		17.0768
11_"Craigella"	8	24.993	1.68182	6.24824	12.4965	18.7447	24.993
11_"Craigella"	8		2.5367	4	4	2	0	10
11_"Craigella"	8		5.13217
11_"Craigella"	8		5.6543
11_"Craigella"	8		7.03492
11_"Craigella"	8		8.05453
11_"Craigella"	8		9.27554
11_"Craigella"	8		11.6878
11_"Craigella"	8		13.9872
11_"Craigella"	8		17.7934
11_"Craigella"	9	29.0695	3.66874	7.26739	14.5348	21.8022	29.0695
11_"Craigella"	9		4.34763	4	3	2	0	9
11_"Craigella"	9		5.46448
11_"Craigella"	9		6.4656
11_"Craigella"	9		8.88147
11_"Craigella"	9		11.5354
11_"Craigella"	9		13.0884
11_"Craigella"	9		16.7997
11_"Craigella"	9		18.1854
11_"Craigella"	11	21.8131	1.38137	5.45328	10.9066	16.3598	21.8131
11_"Craigella"	11		3.04576	3	3	3	1	10
11_"Craigella"	11		5.16479
11_"Craigella"	11		6.88072
11_"Craigella"	11		7.61657
11_"Craigella"	11		8.03349
11_"Craigella"	11		11.892
11_"Craigella"	11		12.7872
11_"Craigella"	11		14.7002
11_"Craigella"	11		17.9945
11_"Craigella"	13	30.4388	2.86285	7.60971	15.2194	22.8291	30.4388
11_"Craigella"	13		4.84361	3	2	5	1	11
11_"Craigella"	13		7.30878
11_"Craigella"	13		9.24129
11_"Craigella"	13		14.0359
11_"Craigella"	13		15.2841
11_"Craigella"	13		16.0461
11_"Craigella"	13		17.2323
11_"Craigella"	13		20.5846
11_"Craigella"	13		22.4007
11_"Craigella"	13		26.4181
11_"Craigella"	14	26.5543	1.87269	6.63858	13.2772	19.9157	26.5543
11_"Craigella"	14		1.96993	5	4	3	0	12
11_"Craigella"	14		3.01749
11_"Craigella"	14		4.13254
11_"Craigella"	14		6.18919
11_"Craigella"	14		7.65113
11_"Craigella"	14		8.82569
11_"Craigella"	14		9.08149
11_"Craigella"	14		12.6709
11_"Craigella"	14		13.5232
11_"Craigella"	14		14.4902
11_"Craigella"	14		16.2359
11_"Craigella"	15	23.0473	1.39189	5.76183	11.5237	17.2855	23.0473
11_"Craigella"	15		1.78341	5	4	4	0	13
11_"Craigella"	15		2.79867
11_"Craigella"	15		3.778
11_"Craigella"	15		4.32192
11_"Craigella"	15		5.85133
11_"Craigella"	15		7.39488
11_"Craigella"	15		8.94609
11_"Craigella"	15		10.0078
11_"Craigella"	15		12.3526
11_"Craigella"	15		13.4081
11_"Craigella"	15		15.3867
11_"Craigella"	15		16.1313
11_"Craigella"	16	27.7312	2.18035	6.93281	13.8656	20.7984	27.7312
11_"Craigella"	16		5.32547	3	5	3	0	11
11_"Craigella"	16		6.09799
11_"Craigella"	16		7.37957
11_"Craigella"	16		8.72863
11_"Craigella"	16		9.06935
11_"Craigella"	16		10.5752
11_"Craigella"	16		12.2414
11_"Craigella"	16		14.6681
11_"Craigella"	16		17.0527
11_"Craigella"	16		19.6931
11_"Craigella"	17	29.2929	1.39009	7.32323	14.6465	21.9697	29.2929
11_"Craigella"	17		2.68294	5	6	2	0	13
11_"Craigella"	17		3.21995
11_"Craigella"	17		5.31072
11_"Craigella"	17		5.71892
11_"Craigella"	17		8.12787
11_"Craigella"	17		9.30349
11_"Craigella"	17		10.5114
11_"Craigella"	17		12.7085
11_"Craigella"	17		13.7665
11_"Craigella"	17		14.5234
11_"Craigella"	17		16.37
11_"Craigella"	17		19.4078
11_"Craigella"	18	25.6918	2.83054	6.42296	12.8459	19.2689	25.6918
11_"Craigella"	18		4.81311	4	6	3	0	13
11_"Craigella"	18		4.91471
11_"Craigella"	18		6.36898
11_"Craigella"	18		7.48764
11_"Craigella"	18		7.81784
11_"Craigella"	18		9.77034
11_"Craigella"	18		10.041
11_"Craigella"	18		11.5563
11_"Craigella"	18		11.9199
11_"Craigella"	18		14.3811
11_"Craigella"	18		14.5397
11_"Craigella"	18		17.6711
11_"Craigella"	20	32.1198	1.98948	8.02996	16.0599	24.0899	32.1198
11_"Craigella"	20		3.14045	5	4	2	0	11
11_"Craigella"	20		4.98624
11_"Craigella"	20		6.62778
11_"Craigella"	20		7.49679
11_"Craigella"	20		9.46853
11_"Craigella"	20		9.59117
11_"Craigella"	20		13.0379
11_"Craigella"	20		15.1174
11_"Craigella"	20		17.1066
11_"Craigella"	20		17.6795
11_"Craigella"	21	31.5852	1.45683	7.8963	15.7926	23.6889	31.5852
11_"Craigella"	21		2.42383	5	4	2	0	11
11_"Craigella"	21		3.76673
11_"Craigella"	21		4.98699
11_"Craigella"	21		7.778
11_"Craigella"	21		8.0574
11_"Craigella"	21		9.87854
11_"Craigella"	21		13.1536
11_"Craigella"	21		15.7814
11_"Craigella"	21		16.5557
11_"Craigella"	21		18.3207
11_"Craigella"	22	26.1048	1.78597	6.52621	13.0524	19.5786	26.1048
11_"Craigella"	22		2.97391	5	3	3	0	11
11_"Craigella"	22		3.41624
11_"Craigella"	22		5.10347
11_"Craigella"	22		6.08099
11_"Craigella"	22		8.02658
11_"Craigella"	22		10.7647
11_"Craigella"	22		11.1685
11_"Craigella"	22		14.0503
11_"Craigella"	22		15.8758
11_"Craigella"	22		17.9887
11_"Craigella"	25	27.4028	1.46809	6.8507	13.7014	20.5521	27.4028
11_"Craigella"	25		1.91222	6	5	2	4	17
11_"Craigella"	25		4.47071
11_"Craigella"	25		5.47799
11_"Craigella"	25		5.96676
11_"Craigella"	25		6.53353
11_"Craigella"	25		8.79263
11_"Craigella"	25		10.1722
11_"Craigella"	25		10.8529
11_"Craigella"	25		11.9679
11_"Craigella"	25		13.2985
11_"Craigella"	25		15.4665
11_"Craigella"	25		17.484
11_"Craigella"	25		20.9216
11_"Craigella"	25		23.214
11_"Craigella"	25		24.2003
11_"Craigella"	25		25.6851
11_"Craigella"	28	29.196	1.96557	7.29899	14.598	21.897	29.196
11_"Craigella"	28		2.2319	6	4	3	0	13
11_"Craigella"	28		2.49642
11_"Craigella"	28		3.38031
11_"Craigella"	28		4.2606
11_"Craigella"	28		7.19137
11_"Craigella"	28		8.79082
11_"Craigella"	28		8.95375
11_"Craigella"	28		11.9222
11_"Craigella"	28		13.3693
11_"Craigella"	28		16.9285
11_"Craigella"	28		17.8447
11_"Craigella"	28		21.582
12_"Moneymaker"	1	31.1381	5.56604	7.78453	15.5691	23.3536	31.1381
12_"Moneymaker"			6.92704	3	3	4	0	10
12_"Moneymaker"			7.75435
12_"Moneymaker"			11.0629
12_"Moneymaker"			12.0799
12_"Moneymaker"			14.4919
12_"Moneymaker"			18.251
12_"Moneymaker"			19.3802
12_"Moneymaker"			22.0023
12_"Moneymaker"			22.2117
12_"Moneymaker"	2	33.3118	5.49388	8.32795	16.6559	24.9838	33.3118
12_"Moneymaker"			9.35362	1	3	6	3	13
12_"Moneymaker"			10.556
12_"Moneymaker"			12.9442
12_"Moneymaker"			17.9429
12_"Moneymaker"			18.1969
12_"Moneymaker"			19.1047
12_"Moneymaker"			22.0755
12_"Moneymaker"			22.1966
12_"Moneymaker"			24.6204
12_"Moneymaker"			28.2761
12_"Moneymaker"			28.3875
12_"Moneymaker"			30.4769
12_"Moneymaker"	3	33.4098	5.57272	8.35244	16.7049	25.0573	33.4098
12_"Moneymaker"			9.49217	1	3	6	3	13
12_"Moneymaker"			10.6253
12_"Moneymaker"			12.9904
12_"Moneymaker"			17.966
12_"Moneymaker"			18.4008
12_"Moneymaker"			19.0721
12_"Moneymaker"			22.1831
12_"Moneymaker"			22.2619
12_"Moneymaker"			24.6953
12_"Moneymaker"			28.3701
12_"Moneymaker"			28.4815
12_"Moneymaker"			30.5709
12_"Moneymaker"	4	56.5493	5.84516	14.1373	28.2746	42.4119	56.5493
12_"Moneymaker"			8.38477	3	4	7	5	19
12_"Moneymaker"			12.9254
12_"Moneymaker"			14.8125
12_"Moneymaker"			15.9648
12_"Moneymaker"			20.2725
12_"Moneymaker"			26.7191
12_"Moneymaker"			29.1987
12_"Moneymaker"			31.4474
12_"Moneymaker"			33.1284
12_"Moneymaker"			36.5231
12_"Moneymaker"			36.5693
12_"Moneymaker"			37.3543
12_"Moneymaker"			42.3221
12_"Moneymaker"			44.1482
12_"Moneymaker"			47.3346
12_"Moneymaker"			47.6499
12_"Moneymaker"			49.3893
12_"Moneymaker"			51.9553
12_"Moneymaker"	5	33.6648	5.77097	8.41619	16.8324	25.2486	33.6648
12_"Moneymaker"			21.3236	1	0	2	5	8
12_"Moneymaker"			23.7415
12_"Moneymaker"			25.8998
12_"Moneymaker"			27.0282
12_"Moneymaker"			28.3757
12_"Moneymaker"			30.0075
12_"Moneymaker"			30.2018
12_"Moneymaker"	6	43.7304	6.15327	10.9326	21.8652	32.7978	43.7304
12_"Moneymaker"			8.1585	2	3	7	2	14
12_"Moneymaker"			18.7254
12_"Moneymaker"			19.1387
12_"Moneymaker"			20.8316
12_"Moneymaker"			22.3859
12_"Moneymaker"			24.6155
12_"Moneymaker"			25.8928
12_"Moneymaker"			28.7388
12_"Moneymaker"			28.9331
12_"Moneymaker"			30.2001
12_"Moneymaker"			30.3944
12_"Moneymaker"			33.1428
12_"Moneymaker"			35.2674
12_"Moneymaker"	7	49.4494	6.2608	12.3624	24.7247	37.0871	49.4494
12_"Moneymaker"			10.4593	1	5	5	0	11
12_"Moneymaker"			17.8817
12_"Moneymaker"			21.9423
12_"Moneymaker"			22.6614
12_"Moneymaker"			23.1097
12_"Moneymaker"			27.5537
12_"Moneymaker"			27.9901
12_"Moneymaker"			31.2317
12_"Moneymaker"			31.5646
12_"Moneymaker"			33.1492
12_"Moneymaker"	8	22.626	1.99634	5.65651	11.313	16.9695	22.626
12_"Moneymaker"			2.07518	3	3	1	0	7
12_"Moneymaker"			5.60113
12_"Moneymaker"			8.01379
12_"Moneymaker"			9.59846
12_"Moneymaker"			10.6537
12_"Moneymaker"			14.5405
12_"Moneymaker"	9	22.7218	0.622775	5.68046	11.3609	17.0414	22.7218
12_"Moneymaker"			4.43238	2	2	4	3	11
12_"Moneymaker"			5.95666
12_"Moneymaker"			7.07787
12_"Moneymaker"			11.678
12_"Moneymaker"			12.5054
12_"Moneymaker"			14.5512
12_"Moneymaker"			15.6747
12_"Moneymaker"			19.5093
12_"Moneymaker"			19.5786
12_"Moneymaker"			20.4435
13_"M82"	1	43.6918	1.60216	10.9229	21.8459	32.7688	43.6918
13_"M82"			2.02108	7	5	4	3	19
13_"M82"			4.5574
13_"M82"			6.07675
13_"M82"			6.95353
13_"M82"			7.73466
13_"M82"			10.3871
13_"M82"			12.6533
13_"M82"			13.8326
13_"M82"			16.399
13_"M82"			16.8641
13_"M82"			21.5798
13_"M82"			23.9535
13_"M82"			24.9322
13_"M82"			28.377
13_"M82"			32.6864
13_"M82"			32.8441
13_"M82"			36.3836
13_"M82"			38.3535
13_"M82"	2	43.5342	3.5444	10.8835	21.7671	32.6506	43.5342
13_"M82"			3.62323	5	3	3	1	12
13_"M82"			5.58528
13_"M82"			7.60307
13_"M82"			10.0543
13_"M82"			11.0663
13_"M82"			14.93
13_"M82"			20.0666
13_"M82"			25.3661
13_"M82"			28.9714
13_"M82"			30.4462
13_"M82"			34.4831
13_"M82"	3	47.1941	1.64698	11.7985	23.5971	35.3956	47.1941
13_"M82"			4.12031	6	3	5	3	17
13_"M82"			5.50344
13_"M82"			8.82949
13_"M82"			9.73168
13_"M82"			11.4612
13_"M82"			15.4476
13_"M82"			17.9601
13_"M82"			21.6447
13_"M82"			23.9277
13_"M82"			25.9765
13_"M82"			30.4014
13_"M82"			34.4202
13_"M82"			35.1432
13_"M82"			36.086
13_"M82"			40.1361
13_"M82"			41.8115
13_"M82"	4	50.4279	1.14362	12.607	25.2139	37.8209	50.4279
13_"M82"			2.97437	4	1	4	4	13
13_"M82"			7.01652
13_"M82"			9.08842
13_"M82"			22.0532
13_"M82"			26.2336
13_"M82"			32.3301
13_"M82"			32.6725
13_"M82"			36.0294
13_"M82"			40.0439
13_"M82"			41.8387
13_"M82"			44.8137
13_"M82"			46.2638
13_"M82"	5	46.4399	4.47488	11.61	23.22	34.8299	46.4399
13_"M82"			4.55372	5	5	2	3	15
13_"M82"			7.26124
13_"M82"			9.85234
13_"M82"			9.90809
13_"M82"			11.855
13_"M82"			14.6644
13_"M82"			20.7587
13_"M82"			20.9068
13_"M82"			22.3578
13_"M82"			24.8081
13_"M82"			31.3406
13_"M82"			37.0621
13_"M82"			40.0728
13_"M82"			40.6072
13_"M82"	6	55.2194	3.7555	13.8048	27.6097	41.4145	55.2194
13_"M82"			6.33896	5	1	4	7	17
13_"M82"			9.35815
13_"M82"			11.937
13_"M82"			13.1984
13_"M82"			23.3412
13_"M82"			28.6935
13_"M82"			31.4657
13_"M82"			34.1989
13_"M82"			36.4433
13_"M82"			42.1548
13_"M82"			44.9078
13_"M82"			44.9636
13_"M82"			48.942
13_"M82"			50.9321
13_"M82"			52.8671
13_"M82"			53.9095
13_"M82"	7	63.4436	2.09431	15.8609	31.7218	47.5827	63.4436
13_"M82"			2.68279	4	3	2	5	14
13_"M82"			3.38276
13_"M82"			7.41303
13_"M82"			27.5411
13_"M82"			30.4037
13_"M82"			31.1172
13_"M82"			35.2867
13_"M82"			37.1725
13_"M82"			49.6516
13_"M82"			51.7875
13_"M82"			54.4435
13_"M82"			56.1541
13_"M82"			57.1002
13_"M82"	9	25.5818	2.05769	6.39546	12.7909	19.1864	25.5818
13_"M82"			3.01495	2	3	0	0	5
13_"M82"			6.96734
13_"M82"			8.39993
13_"M82"			12.3173
13_"M82"	10	17.0479	1.11657	4.26197	8.52393	12.7859	17.0479
13_"M82"			3.58526	3	2	2	0	7
13_"M82"			4.11239
13_"M82"			5.13959
13_"M82"			8.35636
13_"M82"			10.1801
13_"M82"			11.4719
13_"M82"	11	27.0271	1.013	6.75678	13.5136	20.2703	27.0271
13_"M82"			2.13025	4	3	2	0	9
13_"M82"			3.89897
13_"M82"			5.90255
13_"M82"			7.02308
13_"M82"			11.9156
13_"M82"			12.4038
13_"M82"			19.0655
13_"M82"			19.8252
14_"Micro-Tom"	2	37.23	1.01961	9.30751	18.615	27.9225	37.23
14_"Micro-Tom"	2		1.18253	5	6	8	4	23
14_"Micro-Tom"	2		2.19598
14_"Micro-Tom"	2		7.24398
14_"Micro-Tom"	2		9.24292
14_"Micro-Tom"	2		10.7049
14_"Micro-Tom"	2		11.94
14_"Micro-Tom"	2		13.7586
14_"Micro-Tom"	2		14.7967
14_"Micro-Tom"	2		16.3235
14_"Micro-Tom"	2		18.0238
14_"Micro-Tom"	2		19.3098
14_"Micro-Tom"	2		20.6001
14_"Micro-Tom"	2		21.6451
14_"Micro-Tom"	2		22.4702
14_"Micro-Tom"	2		23.4775
14_"Micro-Tom"	2		24.0863
14_"Micro-Tom"	2		25.0831
14_"Micro-Tom"	2		26.6702
14_"Micro-Tom"	2		28.5832
14_"Micro-Tom"	2		30.949
14_"Micro-Tom"	2		31.4632
14_"Micro-Tom"	2		33.116
14_"Micro-Tom"	3	46.4998	1.68798	11.625	23.2499	34.8749	46.4998
14_"Micro-Tom"	3		2.62523	8	9	9	5	31
14_"Micro-Tom"	3		6.49941
14_"Micro-Tom"	3		6.75521
14_"Micro-Tom"	3		7.69066
14_"Micro-Tom"	3		7.8387
14_"Micro-Tom"	3		10.6784
14_"Micro-Tom"	3		11.2136
14_"Micro-Tom"	3		12.4941
14_"Micro-Tom"	3		12.5554
14_"Micro-Tom"	3		14.1339
14_"Micro-Tom"	3		14.5403
14_"Micro-Tom"	3		15.9917
14_"Micro-Tom"	3		17.1873
14_"Micro-Tom"	3		18.7341
14_"Micro-Tom"	3		20.5498
14_"Micro-Tom"	3		22.9218
14_"Micro-Tom"	3		24.5652
14_"Micro-Tom"	3		25.6802
14_"Micro-Tom"	3		26.0209
14_"Micro-Tom"	3		27.1929
14_"Micro-Tom"	3		27.9331
14_"Micro-Tom"	3		28.3395
14_"Micro-Tom"	3		29.5878
14_"Micro-Tom"	3		31.435
14_"Micro-Tom"	3		34.8592
14_"Micro-Tom"	3		35.3814
14_"Micro-Tom"	3		38.307
14_"Micro-Tom"	3		39.4449
14_"Micro-Tom"	3		39.5973
14_"Micro-Tom"	3		42.8742
14_"Micro-Tom"	5	47.972	1.94304	11.993	23.986	35.979	47.972
14_"Micro-Tom"	5		3.51634	6	11	10	8	35
14_"Micro-Tom"	5		8.17163
14_"Micro-Tom"	5		8.6114
14_"Micro-Tom"	5		10.7533
14_"Micro-Tom"	5		11.2867
14_"Micro-Tom"	5		12.7881
14_"Micro-Tom"	5		14.8538
14_"Micro-Tom"	5		14.8538
14_"Micro-Tom"	5		16.209
14_"Micro-Tom"	5		16.8186
14_"Micro-Tom"	5		17.4634
14_"Micro-Tom"	5		18.0984
14_"Micro-Tom"	5		19.5665
14_"Micro-Tom"	5		20.9882
14_"Micro-Tom"	5		21.9439
14_"Micro-Tom"	5		22.7821
14_"Micro-Tom"	5		24.6628
14_"Micro-Tom"	5		24.8362
14_"Micro-Tom"	5		27.3326
14_"Micro-Tom"	5		27.4658
14_"Micro-Tom"	5		30.6164
14_"Micro-Tom"	5		30.775
14_"Micro-Tom"	5		31.8988
14_"Micro-Tom"	5		32.3219
14_"Micro-Tom"	5		33.9046
14_"Micro-Tom"	5		35.5679
14_"Micro-Tom"	5		37.064
14_"Micro-Tom"	5		39.3028
14_"Micro-Tom"	5		40.8874
14_"Micro-Tom"	5		42.4063
14_"Micro-Tom"	5		43.8577
14_"Micro-Tom"	5		44.0416
14_"Micro-Tom"	5		45.1041
14_"Micro-Tom"	5		46.2543
14_"Micro-Tom"	8	37.7789	1.91764	9.44473	18.8895	28.3342	37.7789
14_"Micro-Tom"	8		3.54865	6	10	5	3	24
14_"Micro-Tom"	8		4.76966
14_"Micro-Tom"	8		7.32771
14_"Micro-Tom"	8		7.71923
14_"Micro-Tom"	8		8.52257
14_"Micro-Tom"	8		10.2998
14_"Micro-Tom"	8		11.4228
14_"Micro-Tom"	8		12.58
14_"Micro-Tom"	8		13.5259
14_"Micro-Tom"	8		13.7712
14_"Micro-Tom"	8		14.8039
14_"Micro-Tom"	8		15.2542
14_"Micro-Tom"	8		16.4095
14_"Micro-Tom"	8		17.5797
14_"Micro-Tom"	8		18.3882
14_"Micro-Tom"	8		19.4673
14_"Micro-Tom"	8		21.1665
14_"Micro-Tom"	8		22.5015
14_"Micro-Tom"	8		26.7225
14_"Micro-Tom"	8		27.5197
14_"Micro-Tom"	8		28.3492
14_"Micro-Tom"	8		30.1642
14_"Micro-Tom"	8		34.502
14_"Micro-Tom"	9	44.8483	2.11573	11.2121	22.4241	33.6362	44.8483
14_"Micro-Tom"	9		2.36973	5	10	12	1	28
14_"Micro-Tom"	9		4.76486
14_"Micro-Tom"	9		6.2032
14_"Micro-Tom"	9		8.77943
14_"Micro-Tom"	9		12.1826
14_"Micro-Tom"	9		13.9653
14_"Micro-Tom"	9		14.892
14_"Micro-Tom"	9		15.3151
14_"Micro-Tom"	9		17.1362
14_"Micro-Tom"	9		17.498
14_"Micro-Tom"	9		18.9574
14_"Micro-Tom"	9		19.4251
14_"Micro-Tom"	9		21.0666
14_"Micro-Tom"	9		21.8899
14_"Micro-Tom"	9		23.1189
14_"Micro-Tom"	9		23.5761
14_"Micro-Tom"	9		25.1966
14_"Micro-Tom"	9		25.6538
14_"Micro-Tom"	9		27.304
14_"Micro-Tom"	9		27.6001
[truncated: 1,017 more rows]

## Sheet: LR distance
Genotype	plant	position	resta	SQRT				genotype	Recuento	Promedio	Mediana	DE	CV	Mínimo	Máximo	Rango	Sesgo	Curtosis		genotype	Casos	Media	Grupos Homogéneos			genotype	Recuento	Promedio	Mediana	DE	CV	Mínimo	Máximo	Rango	Sesgo	Curtosis
01. S. corneliomulleri	2	3.18479	0.644225	0.802496				01. S. corneliomulleri	80	2.09941	1.699	1.2956	0.617123	0.069	5.295	5.226	2.29916	-0.774258		05. S. chmielewskii	12	0.942833	X	a		01. S. corneliomulleri	80	1.37244	1.3035	0.467677	0.340764	0.263	2.301	2.038	-0.267497	-0.826337
01. S. corneliomulleri	2	4.1404	0.955612	0.977753				02. S. peruvianum	134	1.3787	1.2375	0.78122	0.566634	0.135	3.404	3.269	3.49174	-0.236854		11_"Craigella"	414	1.0891	X	a		02. S. peruvianum	134	1.12517	1.112	0.336955	0.29947	0.367	1.845	1.478	0.426707	-0.975815
01. S. corneliomulleri	2	4.64048	0.500076	0.707107				03. S. chilense	112	2.53259	2.0955	1.77864	0.702302	0.115	6.909	6.794	3.75788	-0.532679		02. S. peruvianum	134	1.12517	X	a		03. S. chilense	112	1.49244	1.4475	0.554931	0.371829	0.339	2.628	2.289	1.30955	-1.6135
01. S. corneliomulleri	2	6.32243	1.68196	1.29692				04. S. huaylasense	82	2.00127	1.6395	1.36965	0.684389	0.135	5.415	5.28	2.90512	-0.300581		10_"Ailsa Craig"	226	1.17779	XX	ab		04. S. huaylasense	82	1.32567	1.2805	0.496863	0.374801	0.367	2.327	1.96	0.356427	-1.18576
01. S. corneliomulleri	2	9.21468	2.89225	1.70059				05. S. chmielewskii	12	0.97175	0.993	0.542072	0.557831	0.139	1.936	1.797	0.325555	-0.282409		08. S. cheesmanie	28	1.21714	XXXX	abcd		05. S. chmielewskii	12	0.942833	0.9965	0.300919	0.319165	0.373	1.391	1.018	-0.639492	-0.169652
01. S. corneliomulleri	2	9.30704	0.092363	0.303315				06. S. arcanum	59	3.04405	2.669	2.25124	0.739555	0.046	8.851	8.805	2.23721	0.305679		12_"Moneymaker"	94	1.31482	XXX	bcd		06. S. arcanum	59	1.59863	1.634	0.704961	0.440979	0.214	2.975	2.761	-0.448958	-1.152
01. S. corneliomulleri	2	11.2493	1.94224	1.39356				07. S. galapagense	48	2.58581	1.834	2.05724	0.795587	0.079	7.05	6.971	1.76621	-1.31025		04. S. huaylasense	82	1.32567	XXXX	bcde		07. S. galapagense	48	1.46112	1.3535	0.678529	0.464388	0.281	2.655	2.374	0.184855	-1.54825
01. S. corneliomulleri	2	11.6418	0.392545	0.626897				08. S. cheesmanie	28	1.64832	1.2615	1.0803	0.655395	0.246	4.342	4.096	1.98005	0.126962		09. S. pimpinelifollium	259	1.32831	X	c		08. S. cheesmanie	28	1.21714	1.122	0.416097	0.341863	0.496	2.084	1.588	0.679759	-0.578865
01. S. corneliomulleri	4	2.22329	1.04798	1.02372				09. S. pimpinelifollium	259	1.94151	1.797	1.12515	0.579525	0.079	4.886	4.807	3.86195	-1.21711		01. S. corneliomulleri	80	1.37244	XXX	cde		09. S. pimpinelifollium	259	1.32831	1.341	0.421628	0.317417	0.281	2.21	1.929	-0.612348	-1.49545
01. S. corneliomulleri	4	4.47063	2.24734	1.499				10_"Ailsa Craig"	226	1.58064	1.394	1.03726	0.656228	0.056	4.571	4.515	3.91764	-0.653709		07. S. galapagense	48	1.46112	XXXX	cdef		10_"Ailsa Craig"	226	1.17779	1.1805	0.440913	0.374357	0.237	2.138	1.901	-0.875836	-1.65902
01. S. corneliomulleri	4	5.92796	1.45733	1.20706				11_"Craigella"	414	1.32889	1.2	0.815772	0.613875	0.051	3.478	3.427	4.4719	-1.46628		13_"M82"	114	1.46532	XXX	def		11_"Craigella"	414	1.0891	1.095	0.378292	0.347343	0.226	1.865	1.639	-1.51024	-2.33194
01. S. corneliomulleri	4	8.872	2.94403	1.71581				12_"Moneymaker"	94	2.04246	1.8565	1.45961	0.714636	0.046	6.447	6.401	2.28332	-0.617039		03. S. chilense	112	1.49244	XX	ef		12_"Moneymaker"	94	1.31482	1.3625	0.563217	0.428361	0.214	2.539	2.325	-0.786282	-1.5218
01. S. corneliomulleri	4	9.47236	0.600364	0.774597				13_"M82"	114	2.43839	2.255	1.57472	0.645804	0.056	6.662	6.606	2.80594	-0.259278		06. S. arcanum	59	1.59863	X	f		13_"M82"	114	1.46532	1.5015	0.542023	0.3699	0.237	2.581	2.344	-0.858071	-0.793988
01. S. corneliomulleri	4	11.085	1.61268	1.27004
01. S. corneliomulleri	4	13.596	2.51091	1.58461				Total	1662	1.83044	1.502	1.33245	0.727942	0.046	8.851	8.805	21.5834	18.2596								Total	1662	1.26234	1.226	0.48693	0.385735	0.214	2.975	2.761	4.45607	-0.578537
01. S. corneliomulleri	4	16.3823	2.78636	1.66913
01. S. corneliomulleri	5	2.86984	0.861608	0.92844
01. S. corneliomulleri	5	4.6201	1.75027	1.32288
01. S. corneliomulleri	5	5.12414	0.504039	0.70993				genotype	Recuento	Promedio	Mediana	DE	CV	Mínimo	Máximo	Rango	Sesgo	Curtosis		genotype	Casos	Media	Grupos Homogéneos			genotype	Recuento	Promedio	Mediana	DE	CV	Mínimo	Máximo	Rango	Sesgo	Curtosis
01. S. corneliomulleri	5	6.03918	0.915033	0.956556				14_"Micro-Tom"	392	1.16966	1.1495	0.612958	0.524047	0	2.744	2.744	1.99084	-2.08681		16_anthocyaninless	364	1.0126	X	a		14_"Micro-Tom"	392	1.03556	1.072	0.312359	0.301632	0	1.657	1.657	-3.88278	-0.555016
01. S. corneliomulleri	5	10.6107	4.57149	2.13799				15_anthocyanin absent	48	1.34585	1.1135	0.760268	0.564896	0.061	3.22	3.159	2.23967	-0.061331		14_"Micro-Tom"	392	1.03556	XX	ab		15_anthocyanin absent	48	1.11287	1.0555	0.331078	0.297498	0.247	1.794	1.547	0.251259	-0.115438
01. S. corneliomulleri	5	10.8878	0.277091	0.526308				16_anthocyaninless	364	1.12917	1.022	0.652638	0.577979	0.061	2.814	2.753	4.05415	-1.70803		18_lutescent	110	1.06391	XX	ab		16_anthocyaninless	364	1.0126	1.011	0.322662	0.318648	0.247	1.677	1.43	-0.924358	-2.36111
01. S. corneliomulleri	6	3.11359	1.20333	1.09681				17_bushy	87	1.43009	1.185	0.957612	0.669616	0.159	3.698	3.539	3.05629	-0.590997		19_Never ripe	94	1.10833	XX	ab		17_bushy	87	1.12861	1.089	0.397584	0.352278	0.399	1.923	1.524	1.16291	-1.69046
01. S. corneliomulleri	6	4.68802	1.57442	1.25459				18_lutescent	110	1.24502	1.2875	0.702694	0.564405	0.051	3.136	3.085	1.88966	-0.298878		15_anthocyanin absent	48	1.11287	XX	ab		18_lutescent	110	1.06391	1.1345	0.337939	0.317639	0.226	1.771	1.545	-1.12832	-1.04091
01. S. corneliomulleri	6	7.15603	2.46801	1.57099				19_Never ripe	94	1.33799	1.191	0.720004	0.538124	0.061	3.14	3.079	1.93151	-0.436662		17_bushy	87	1.12861	X	b		19_Never ripe	94	1.10833	1.091	0.332777	0.300251	0.247	1.772	1.525	-1.2122	-0.0249876
01. S. corneliomulleri	7	2.37797	0.069272	0.262679				20_sitiens	27	1.57178	1.375	0.964468	0.613616	0.076	3.898	3.822	0.813964	-0.218008		20_sitiens	27	1.17937	XX	ab		20_sitiens	27	1.17937	1.173	0.433357	0.367448	0.276	1.974	1.698	-1.01821	-0.197158
01. S. corneliomulleri	7	4.99873	2.62076	1.61895
01. S. corneliomulleri	7	6.13742	1.1387	1.06724				Total	1122	1.21543	1.1295	0.698578	0.574761	0	3.898	3.898	8.68001	1.32395								Total	1122	1.05097	1.063	0.333162	0.317004	0	1.974	1.974	-2.04288	-2.10076
01. S. corneliomulleri	7	9.0887	2.95128	1.71785
01. S. corneliomulleri	7	10.1495	1.06082	1.03005
01. S. corneliomulleri	7	11.4244	1.27492	1.12916
01. S. corneliomulleri	7	15.1074	3.68294	1.91911
01. S. corneliomulleri	8	5.38923	0.540656	0.735527
01. S. corneliomulleri	10	7.95481	0.309746	0.556776
01. S. corneliomulleri	10	12.1824	4.22756	2.05621
01. S. corneliomulleri	10	13.8977	1.71529	1.30958
01. S. corneliomulleri	10	15.1901	1.29241	1.13666
01. S. corneliomulleri	10	16.8734	1.68331	1.2973
01. S. corneliomulleri	10	20.1638	3.2904	1.81384
01. S. corneliomulleri	10	21.441	1.27724	1.13004
01. S. corneliomulleri	10	26.7364	5.29534	2.30109
01. S. corneliomulleri	10	29.499	2.76259	1.66223
01. S. corneliomulleri	10	34.3136	4.81468	2.19431
01. S. corneliomulleri	11	15.3323	2.85399	1.68938
01. S. corneliomulleri	11	16.8962	1.5639	1.2506
01. S. corneliomulleri	11	20.3842	3.48797	1.86762
01. S. corneliomulleri	12	11.2332	1.67307	1.29345
01. S. corneliomulleri	12	11.7962	0.563067	0.750333
01. S. corneliomulleri	12	13.6699	1.87365	1.36894
01. S. corneliomulleri	12	16.2675	2.59767	1.61183
01. S. corneliomulleri	13	4.03983	1.11725	1.05688
01. S. corneliomulleri	13	5.36326	1.32343	1.15022
01. S. corneliomulleri	13	6.73943	1.37617	1.17303
01. S. corneliomulleri	13	8.84002	2.10059	1.44948
01. S. corneliomulleri	13	11.8559	3.01591	1.73666
01. S. corneliomulleri	14	11.8353	4.67013	2.16102
01. S. corneliomulleri	14	13.1165	1.2812	1.13181
01. S. corneliomulleri	14	15.7924	2.67583	1.63585
01. S. corneliomulleri	14	18.2445	2.45216	1.56589
01. S. corneliomulleri	14	20.5737	2.32918	1.52611
01. S. corneliomulleri	14	25.115	4.54127	2.13096
01. S. corneliomulleri	14	26.6597	1.54477	1.24298
01. S. corneliomulleri	15	4.58009	1.13241	1.06395
01. S. corneliomulleri	15	7.10384	2.52376	1.58871
01. S. corneliomulleri	15	8.47509	1.37125	1.1709
01. S. corneliomulleri	15	17.6698	2.15798	1.46901
01. S. corneliomulleri	16	10.37	4.20583	2.05085
01. S. corneliomulleri	16	11.5391	1.16903	1.0812
01. S. corneliomulleri	16	15.7214	4.18234	2.04499
01. S. corneliomulleri	17	14.6412	2.30609	1.51855
01. S. corneliomulleri	17	15.6357	0.99455	0.997497
01. S. corneliomulleri	18	3.78883	2.71544	1.64773
01. S. corneliomulleri	18	8.2443	4.45547	2.11069
01. S. corneliomulleri	19	13.1311	3.08162	1.75556
01. S. corneliomulleri	19	14.5542	1.42303	1.1929
01. S. corneliomulleri	19	22.686	1.62129	1.27318
01. S. corneliomulleri	19	23.7403	1.05426	1.02665
01. S. corneliomulleri	21	14.7834	4.69894	2.16772
01. S. corneliomulleri	21	18.5274	3.74401	1.93494
01. S. corneliomulleri	21	22.1642	3.63676	1.90709
02. S. peruvianum	1	1.28217	0.555823	0.745654
02. S. peruvianum	1	3.29232	2.01015	1.41774
02. S. peruvianum	1	5.49648	2.20416	1.48459
02. S. peruvianum	1	7.02376	1.52728	1.23572
02. S. peruvianum	1	7.85668	0.832914	0.912688
02. S. peruvianum	1	9.21276	1.35608	1.16447
02. S. peruvianum	1	10.2591	1.04634	1.02274
02. S. peruvianum	1	18.4099	3.40381	1.84499
02. S. peruvianum	1	19.0661	0.65611	0.809938
02. S. peruvianum	1	19.9293	0.863249	0.928978
02. S. peruvianum	2	4.28987	1.43096	1.19624
02. S. peruvianum	2	5.45658	1.16671	1.08028
02. S. peruvianum	2	10.9303	1.05754	1.02859
02. S. peruvianum	2	11.4152	0.484909	0.696419
02. S. peruvianum	2	12.9068	1.49163	1.22147
02. S. peruvianum	2	14.3681	1.46129	1.20872
02. S. peruvianum	2	16.4591	2.09103	1.44603
02. S. peruvianum	2	16.8916	0.432445	0.657267
02. S. peruvianum	2	17.7261	0.834555	0.913783
02. S. peruvianum	3	4.23316	0.672919	0.820366
02. S. peruvianum	3	4.83681	0.603645	0.777174
02. S. peruvianum	3	6.8971	2.0603	1.43527
02. S. peruvianum	3	8.15058	1.25347	1.11937
02. S. peruvianum	3	9.03759	0.887019	0.941807
02. S. peruvianum	3	14.1634	1.31946	1.14848
02. S. peruvianum	3	15.9216	1.75819	1.3259
02. S. peruvianum	3	16.7347	0.813105	0.901665
02. S. peruvianum	3	19.5415	2.80685	1.67541
02. S. peruvianum	3	22.1709	2.62936	1.62142
02. S. peruvianum	4	5.48624	2.9193	1.70851
02. S. peruvianum	4	7.41563	1.92939	1.38888
02. S. peruvianum	4	8.59491	1.17928	1.08582
02. S. peruvianum	4	9.51062	0.915713	0.957079
02. S. peruvianum	4	15.9473	1.97954	1.40712
02. S. peruvianum	4	16.3566	0.409354	0.639531
02. S. peruvianum	5	3.85743	2.47101	1.57194
02. S. peruvianum	5	6.2097	2.35227	1.53362
02. S. peruvianum	5	7.57534	1.36565	1.16876
02. S. peruvianum	5	8.83346	1.25811	1.12161
02. S. peruvianum	5	9.82733	0.993871	0.996995
02. S. peruvianum	5	33.9013	3.18683	1.78522
02. S. peruvianum	7	3.2673	0.788373	0.887694
02. S. peruvianum	7	9.86587	1.4382	1.19917
02. S. peruvianum	7	10.6374	0.771565	0.878635
02. S. peruvianum	7	10.8795	0.242115	0.491935
02. S. peruvianum	7	12.5071	1.62757	1.27593
02. S. peruvianum	7	12.6879	0.180765	0.425441
02. S. peruvianum	7	15.1635	2.47565	1.57353
02. S. peruvianum	7	16.0522	0.88866	0.942868
02. S. peruvianum	7	19.3426	3.2904	1.81384
02. S. peruvianum	7	20.6581	1.3155	1.14717
02. S. peruvianum	7	22.3097	1.65162	1.2853
02. S. peruvianum	7	24.5736	2.26387	1.50466
02. S. peruvianum	8	2.5254	1.48602	1.21902
02. S. peruvianum	8	3.48101	0.955612	0.977753
02. S. peruvianum	8	5.66372	2.18271	1.4775
02. S. peruvianum	8	6.41548	0.751756	0.867179
02. S. peruvianum	8	7.41891	1.00343	1.0015
02. S. peruvianum	8	8.51307	1.09416	1.04594
02. S. peruvianum	8	9.04976	0.536694	0.732803
02. S. peruvianum	8	10.48	1.43028	1.19583
02. S. peruvianum	8	11.4419	0.961895	0.980816
02. S. peruvianum	8	14.0508	2.60887	1.61524
02. S. peruvianum	9	3.28083	2.47729	1.57385
02. S. peruvianum	9	4.28495	1.00411	1.002
02. S. peruvianum	9	5.20626	0.921316	0.959687
02. S. peruvianum	9	6.5607	1.35444	1.16362
02. S. peruvianum	9	7.68916	1.12845	1.06207
02. S. peruvianum	9	10.6481	2.95892	1.72017
02. S. peruvianum	9	11.0152	0.367133	0.605805
02. S. peruvianum	9	21.8793	1.68496	1.29808
02. S. peruvianum	9	23.2984	1.41907	1.19122
02. S. peruvianum	10	2.38821	0.769244	0.876926
02. S. peruvianum	10	3.45599	1.06778	1.03344
02. S. peruvianum	10	3.8868	0.430804	0.656506
02. S. peruvianum	10	4.54455	0.657751	0.811172
02. S. peruvianum	10	5.0311	0.48655	0.697854
02. S. peruvianum	10	6.48351	1.45241	1.20499
02. S. peruvianum	10	6.82755	0.344043	0.586515
02. S. peruvianum	10	9.16629	2.33875	1.52938
02. S. peruvianum	10	10.2301	1.06382	1.0315
02. S. peruvianum	10	12.2512	2.02108	1.42162
02. S. peruvianum	10	12.3858	0.134584	0.367423
02. S. peruvianum	11	3.49261	0.531091	0.728697
02. S. peruvianum	11	4.57556	1.08295	1.04067
02. S. peruvianum	11	5.50412	0.928559	0.963846
02. S. peruvianum	11	6.33143	0.827311	0.909395
02. S. peruvianum	11	9.27711	2.94567	1.71639
02. S. peruvianum	11	15.7217	1.76611	1.32891
02. S. peruvianum	11	16.7393	1.01764	1.00896
02. S. peruvianum	11	18.3223	1.58303	1.25817
02. S. peruvianum	11	19.2724	0.950009	0.974679
02. S. peruvianum	11	22.5201	3.24778	1.80222
02. S. peruvianum	11	23.0219	0.501718	0.70852
02. S. peruvianum	12	0.947689	0.254	0.503984
02. S. peruvianum	12	1.77828	0.830593	0.911592
02. S. peruvianum	12	3.18315	1.40487	1.18533
02. S. peruvianum	12	4.33865	1.15551	1.07517
02. S. peruvianum	12	4.69458	0.355928	0.596657
02. S. peruvianum	12	6.01965	1.32507	1.15109
02. S. peruvianum	12	7.51824	1.49859	1.22434
02. S. peruvianum	12	7.84315	0.324913	0.570088
02. S. peruvianum	12	11.7055	0.161636	0.402492
02. S. peruvianum	12	13.9251	2.21961	1.48997
02. S. peruvianum	12	15.1331	1.20797	1.09909
02. S. peruvianum	12	16.3555	1.22246	1.10544
02. S. peruvianum	13	1.64766	0.878416	0.937017
02. S. peruvianum	13	2.7824	1.13474	1.06536
02. S. peruvianum	13	4.26746	1.48506	1.21861
02. S. peruvianum	13	4.97535	0.707895	0.841427
02. S. peruvianum	13	6.23279	1.25744	1.12116
02. S. peruvianum	13	7.6136	1.38081	1.17516
02. S. peruvianum	13	10.1054	2.49178	1.57861
02. S. peruvianum	13	11.4846	1.37917	1.17431
02. S. peruvianum	13	14.6219	3.13736	1.77116
02. S. peruvianum	13	17.7626	3.14065	1.77229
02. S. peruvianum	13	24.8113	2.60655	1.61462
02. S. peruvianum	14	1.6467	0.315349	0.561249
02. S. peruvianum	14	2.83882	1.19212	1.09179
02. S. peruvianum	14	4.45383	1.61501	1.27083
02. S. peruvianum	14	5.78121	1.32739	1.15195
02. S. peruvianum	14	6.74871	0.967497	0.983362
02. S. peruvianum	14	8.02924	1.28053	1.13181
02. S. peruvianum	14	10.0051	1.97586	1.4057
02. S. peruvianum	14	11.8939	1.88881	1.37441
02. S. peruvianum	18	2.4113	1.10604	1.05167
02. S. peruvianum	18	3.2475	0.836195	0.91433
02. S. peruvianum	18	4.55179	1.3043	1.14193
02. S. peruvianum	18	10.5605	1.89934	1.37804
02. S. peruvianum	20	2.33343	1.13802	1.06677
02. S. peruvianum	20	3.30092	0.967497	0.983362
02. S. peruvianum	20	3.69907	0.398148	0.630872
02. S. peruvianum	20	6.07936	2.38029	1.54272
02. S. peruvianum	20	8.58958	2.51023	1.5843
03. S. chilense	1	2.80056	0.240474	0.489898
03. S. chilense	1	14.6426	1.61732	1.27161
03. S. chilense	1	15.0407	0.398148	0.630872
03. S. chilense	1	16.6643	1.62361	1.27436
03. S. chilense	1	18.6306	1.96629	1.40214
03. S. chilense	1	20.1381	1.50747	1.2276
03. S. chilense	1	21.9434	1.80533	1.3435
03. S. chilense	1	22.9333	0.989908	0.994987
03. S. chilense	1	38.4911	6.48531	2.54657
03. S. chilense	2	9.79467	3.0021	1.73263
03. S. chilense	2	11.0274	1.2327	1.11041
03. S. chilense	2	13.2388	2.21141	1.48694
03. S. chilense	2	19.5254	6.28661	2.50739
03. S. chilense	2	20.4315	0.906148	0.95184
03. S. chilense	2	20.7604	0.328876	0.573585
03. S. chilense	2	22.9168	2.15634	1.46833
03. S. chilense	2	27.6645	4.74773	2.17899
03. S. chilense	2	33.0855	5.42104	2.3283
03. S. chilense	2	41.2735	0.688766	0.83006
03. S. chilense	3	11.5925	2.23682	1.49566
03. S. chilense	3	13.1804	1.58795	1.26016
03. S. chilense	3	15.5139	2.33342	1.52742
03. S. chilense	4	4.352	1.145	1.07005
03. S. chilense	4	5.783	1.431	1.19624
03. S. chilense	4	7.049	1.266	1.12517
03. S. chilense	4	12.541	5.492	2.3435
03. S. chilense	4	13.654	1.113	1.05499
03. S. chilense	4	15.298	1.644	1.28219
03. S. chilense	4	17.645	2.347	1.53199
03. S. chilense	5	13.1199	0.515244	0.717635
03. S. chilense	5	16.1029	2.98297	1.72714
03. S. chilense	5	17.7664	1.66351	1.28996
03. S. chilense	5	20.9945	3.22809	1.79666
03. S. chilense	5	22.3212	1.32671	1.15195
03. S. chilense	5	24.9044	2.58318	1.60717
03. S. chilense	5	28.6263	3.72188	1.92925
03. S. chilense	7	8.71048	2.11412	1.45396
03. S. chilense	9	6.28089	3.44603	1.85634
03. S. chilense	9	8.2066	1.92571	1.3878
03. S. chilense	9	14.5021	6.2955	2.50898
03. S. chilense	9	21.4108	6.90871	2.6285
03. S. chilense	9	27.8152	6.40439	2.53061
03. S. chilense	10	1.00179	0.617172	0.785493
03. S. chilense	10	3.09775	2.09595	1.44776
03. S. chilense	10	19.5135	0.911752	0.954987
03. S. chilense	10	19.875	0.361531	0.601664
03. S. chilense	10	22.7894	2.91438	1.70704
03. S. chilense	10	27.45	4.66057	2.15893
03. S. chilense	10	32.6219	5.17197	2.2742
03. S. chilense	10	36.738	4.11607	2.02879
03. S. chilense	11	9.6452	3.63252	1.90604
03. S. chilense	11	11.7227	2.0775	1.44153
03. S. chilense	11	12.3095	0.586837	0.766159
03. S. chilense	11	13.9539	1.64438	1.28219
03. S. chilense	11	20.0856	6.1317	2.47629
03. S. chilense	12	3.12644	1.94852	1.39607
03. S. chilense	12	4.86646	1.74002	1.31909
03. S. chilense	12	9.71272	4.84626	2.20136
03. S. chilense	12	13.1941	3.48141	1.86574
03. S. chilense	12	18.6918	5.49772	2.34478
03. S. chilense	12	23.5084	4.8166	2.19477
03. S. chilense	12	26.815	3.30652	1.81852
03. S. chilense	12	30.6108	3.79579	1.94833
03. S. chilense	12	33.4367	2.82598	1.68107
03. S. chilense	13	11.2165	2.34899	1.53264
03. S. chilense	13	12.4841	1.26768	1.12606
03. S. chilense	13	13.6268	1.14266	1.06911
03. S. chilense	13	16.6128	2.98597	1.728
03. S. chilense	13	18.7173	2.10455	1.45086
03. S. chilense	13	25.2713	6.55402	2.56008
03. S. chilense	13	26.1115	0.840158	0.916515
03. S. chilense	13	40.4326	4.52202	2.1265
03. S. chilense	14	3.70303	1.70409	1.30537
03. S. chilense	14	5.79802	2.09499	1.44741
03. S. chilense	14	6.68108	0.883058	0.939681
03. S. chilense	14	7.50047	0.819387	0.904986
03. S. chilense	14	10.6474	3.14693	1.77398
03. S. chilense	14	16.1373	5.48992	2.34307
03. S. chilense	14	16.9695	0.832234	0.91214
03. S. chilense	14	17.9753	1.00576	1.003
03. S. chilense	14	19.1546	1.17928	1.08582
03. S. chilense	14	20.2471	1.09252	1.04547
03. S. chilense	14	23.4052	3.15813	1.77708
03. S. chilense	14	25.7097	2.30445	1.51789
03. S. chilense	14	27.8112	2.10155	1.44983
03. S. chilense	14	34.3251	6.51384	2.55225
03. S. chilense	15	1.87064	0.815425	0.902774
03. S. chilense	15	4.15365	2.283	1.51096
03. S. chilense	15	4.6943	0.540655	0.735527
03. S. chilense	15	5.53214	0.837837	0.915423
03. S. chilense	17	11.0748	0.609928	0.781025
03. S. chilense	17	12.1475	1.07271	1.03586
03. S. chilense	17	14.7251	2.57758	1.60562
03. S. chilense	17	16.5479	1.82282	1.35019
03. S. chilense	18	2.11604	1.40322	1.18448
03. S. chilense	18	4.1404	2.02436	1.42267
03. S. chilense	18	8.63933	4.49893	2.12108
03. S. chilense	18	9.36471	0.725383	0.851469
03. S. chilense	18	13.8881	4.52338	2.12673
03. S. chilense	18	18.2291	4.34097	2.08351
03. S. chilense	18	21.6296	3.40053	1.84418
03. S. chilense	18	25.8908	4.26117	2.06422
03. S. chilense	19	1.64766	1.09976	1.04881
03. S. chilense	19	2.60095	0.953291	0.976217
03. S. chilense	19	3.11059	0.509641	0.714143
03. S. chilense	20	1.36565	0.115455	0.339116
03. S. chilense	20	2.44067	1.07503	1.03682
03. S. chilense	20	3.53483	1.09416	1.04594
03. S. chilense	24	4.06881	2.36212	1.53688
03. S. chilense	24	6.67768	2.60887	1.61524
03. S. chilense	24	12.7654	6.08768	2.46739
03. S. chilense	24	16.1679	3.40257	1.84472
04. S. huaylasense	1	6.18893	1.25347	1.11937
04. S. huaylasense	1	8.24498	2.05605	1.43388
04. S. huaylasense	1	9.985	1.74002	1.31909
04. S. huaylasense	1	10.1235	0.138546	0.372827
04. S. huaylasense	2	5.21022	4.10322	2.02559
04. S. huaylasense	2	5.35833	0.14811	0.384708
04. S. huaylasense	2	6.52176	1.16343	1.07842
04. S. huaylasense	2	9.02447	2.5027	1.58209
04. S. huaylasense	2	18.9854	1.62525	1.27475
04. S. huaylasense	2	22.6077	3.62227	1.90316
04. S. huaylasense	2	25.8104	3.20267	1.78969
04. S. huaylasense	2	29.0998	3.28944	1.81356
04. S. huaylasense	2	30.5235	1.42371	1.19331
04. S. huaylasense	2	32.855	2.3315	1.52709
04. S. huaylasense	3	4.91729	2.29981	1.51658
04. S. huaylasense	3	5.94449	1.02721	1.01341
04. S. huaylasense	3	6.79093	0.84644	0.919783
04. S. huaylasense	3	9.76898	2.97805	1.72569
04. S. huaylasense	3	9.90356	0.134584	0.367423
04. S. huaylasense	3	14.0658	4.16225	2.0401
04. S. huaylasense	3	17.2909	3.22508	1.79583
04. S. huaylasense	3	25.6246	1.65394	1.28608
04. S. huaylasense	3	28.3209	2.69631	1.64195
04. S. huaylasense	4	3.87395	2.61419	1.61679
04. S. huaylasense	4	7.57738	3.70343	1.92432
04. S. huaylasense	4	8.56401	0.986626	0.993479
04. S. huaylasense	4	9.6885	1.12449	1.06019
04. S. huaylasense	4	12.4567	2.76819	1.66373
04. S. huaylasense	4	24.5984	5.21323	2.2832
04. S. huaylasense	4	29.0368	4.43838	2.10666
04. S. huaylasense	4	32.0699	3.03311	1.74155
04. S. huaylasense	6	7.16503	0.898224	0.947629
04. S. huaylasense	6	9.92625	2.76123	1.66163
04. S. huaylasense	6	10.1341	0.207819	0.45607
04. S. huaylasense	6	11.3103	1.17628	1.08444
04. S. huaylasense	6	12.4514	1.14102	1.06818
04. S. huaylasense	6	14.4421	1.99074	1.41103
04. S. huaylasense	7	7.4025	1.02557	1.01292
04. S. huaylasense	7	7.84847	0.445971	0.667832
04. S. huaylasense	7	12.5082	4.65972	2.1587
04. S. huaylasense	7	17.9236	5.41544	2.32702
04. S. huaylasense	7	33.0309	0.793976	0.891067
04. S. huaylasense	9	4.20379	2.75138	1.65861
04. S. huaylasense	9	4.82656	0.622775	0.789303
04. S. huaylasense	9	6.70021	1.87365	1.36894
04. S. huaylasense	9	8.26015	1.55994	1.249
04. S. huaylasense	10	1.28845	0.617172	0.785493
04. S. huaylasense	10	6.4148	5.12635	2.26407
04. S. huaylasense	10	7.73522	1.32043	1.14891
04. S. huaylasense	10	12.1171	4.38183	2.09332
04. S. huaylasense	10	12.8711	0.754077	0.868332
04. S. huaylasense	10	14.2935	1.42235	1.19248
04. S. huaylasense	10	16.9459	2.65245	1.6285
04. S. huaylasense	11	8.03704	3.1789	1.78298
04. S. huaylasense	11	10.2372	2.2002	1.48324
04. S. huaylasense	13	3.35271	1.54013	1.24097
04. S. huaylasense	13	3.78911	0.436406	0.660303
04. S. huaylasense	13	5.75937	1.97025	1.40357
04. S. huaylasense	13	8.00111	2.24174	1.49733
04. S. huaylasense	13	12.7967	4.79555	2.18998
04. S. huaylasense	16	2.22261	0.821029	0.906091
04. S. huaylasense	16	3.46884	1.24623	1.11624
04. S. huaylasense	16	4.56532	1.09648	1.0469
04. S. huaylasense	16	5.2422	0.67688	0.8228
04. S. huaylasense	16	6.95025	1.70805	1.3069
04. S. huaylasense	16	9.84549	2.89525	1.70147
04. S. huaylasense	16	11.1165	1.27096	1.12739
04. S. huaylasense	17	2.85891	1.51075	1.22923
04. S. huaylasense	17	5.31339	2.45448	1.56652
04. S. huaylasense	17	5.95202	0.638622	0.799375
04. S. huaylasense	17	6.87101	0.918995	0.958645
04. S. huaylasense	17	14.612	2.09923	1.44879
04. S. huaylasense	17	16.0574	1.44545	1.20208
04. S. huaylasense	19	4.84105	2.1972	1.48223
04. S. huaylasense	19	5.23128	0.390224	0.6245
04. S. huaylasense	19	6.45606	1.22478	1.1068
04. S. huaylasense	21	6.20545	0.67524	0.821584
04. S. huaylasense	21	7.18088	0.975421	0.987421
04. S. huaylasense	21	7.45564	0.27477	0.524404
04. S. huaylasense	21	10.4106	2.95496	1.71901
04. S. huaylasense	21	15.3473	4.9367	2.22194
04. S. huaylasense	21	15.5782	0.230909	0.480625
05. S. chmielewskii	1	3.0931	0.52877	0.727324
05. S. chmielewskii	8	5.36614	1.93596	1.3914
05. S. chmielewskii	8	6.54706	1.18092	1.08674
05. S. chmielewskii	9	2.93351	0.946048	0.972625
05. S. chmielewskii	11	5.74652	1.10604	1.05167
05. S. chmielewskii	11	7.48654	1.74002	1.31909
05. S. chmielewskii	11	8.01763	0.53109	0.728697
05. S. chmielewskii	11	9.05769	1.04005	1.0198
05. S. chmielewskii	11	9.98296	0.925277	0.961769
05. S. chmielewskii	13	2.06726	0.138546	0.372827
05. S. chmielewskii	14	2.38657	1.29241	1.13666
05. S. chmielewskii	14	2.68279	0.29622	0.544059
06. S. arcanum	1	15.3315	4.27238	2.06688
06. S. arcanum	1	18.9943	3.66285	1.9139
06. S. arcanum	2	14.341	3.09118	1.75812
06. S. arcanum	2	16.3047	1.96369	1.40143
06. S. arcanum	2	20.8894	4.58473	2.14126
06. S. arcanum	2	20.9356	0.046182	0.214476
06. S. arcanum	3	11.8877	1.96369	1.40143
06. S. arcanum	3	13.3061	1.41839	1.1908
06. S. arcanum	3	18.8247	5.51861	2.34926
06. S. arcanum	3	22.8616	4.03683	2.00923
06. S. arcanum	4	10.9268	6.49047	2.54755
06. S. arcanum	4	14.8024	3.87559	1.96876
06. S. arcanum	4	16.6882	1.88581	1.37332
06. S. arcanum	4	17.0052	0.316991	0.563028
06. S. arcanum	4	19.998	2.99282	1.73003
06. S. arcanum	4	24.3849	4.38688	2.09452
06. S. arcanum	6	9.21848	4.47828	2.11613
06. S. arcanum	6	11.323	2.10455	1.45086
06. S. arcanum	6	15.6344	4.31132	2.07629
06. S. arcanum	6	24.4849	8.85055	2.97506
06. S. arcanum	8	11.4364	1.09812	1.04785
06. S. arcanum	8	11.7653	0.328876	0.573585
06. S. arcanum	8	13.7178	1.95248	1.39714
06. S. arcanum	8	17.0191	3.30132	1.81687
06. S. arcanum	8	18.7918	1.77268	1.33154
06. S. arcanum	9	7.58807	6.7654	2.60096
06. S. arcanum	9	7.7728	0.184727	0.430116
06. S. arcanum	9	12.1121	4.33933	2.08303
06. S. arcanum	9	12.2276	0.115455	0.339116
06. S. arcanum	9	17.7623	5.53474	2.35266
06. S. arcanum	10	1.96929	0.573311	0.756968
06. S. arcanum	10	2.71941	0.750115	0.866025
06. S. arcanum	10	4.91796	2.19856	1.4829
06. S. arcanum	10	9.93226	5.01429	2.2392
06. S. arcanum	10	13.9922	4.05992	2.01494
06. S. arcanum	10	14.3943	0.40211	0.634035
06. S. arcanum	10	18.7406	4.3463	2.08471
06. S. arcanum	10	18.9962	0.255641	0.505964
06. S. arcanum	10	23.4976	4.50137	2.12156
06. S. arcanum	11	15.0119	4.93437	2.22126
06. S. arcanum	11	15.2062	0.194292	0.440454
06. S. arcanum	12	7.04165	4.58185	2.14056
06. S. arcanum	12	9.71023	2.66858	1.63371
06. S. arcanum	12	12.0714	2.36116	1.53655
06. S. arcanum	12	13.0923	1.02092	1.01045
06. S. arcanum	12	17.1364	4.04407	2.01097
06. S. arcanum	13	9.89468	8.83878	2.97305
06. S. arcanum	13	11.5598	1.66515	1.29035
06. S. arcanum	13	15.8039	4.24409	2.0601
06. S. arcanum	14	21.383	8.63413	2.93837
06. S. arcanum	19	11.2193	0.929239	0.963846
06. S. arcanum	19	12.1367	0.917354	0.957601
06. S. arcanum	20	9.48929	3.67802	1.91781
06. S. arcanum	20	10.0006	0.511282	0.714843
06. S. arcanum	20	12.1688	2.16822	1.47241
06. S. arcanum	21	8.19772	2.48918	1.57766
06. S. arcanum	21	8.67074	0.473024	0.68775
06. S. arcanum	21	10.5939	1.92311	1.38672
06. S. arcanum	21	16.1722	5.57832	2.36178
07. S. galapagense	2	2.94335	0.138546	0.372827
07. S. galapagense	2	7.04742	4.10406	2.02583
07. S. galapagense	2	19.2601	0.717459	0.846759
07. S. galapagense	2	20.7956	1.53549	1.23895
07. S. galapagense	4	3.35503	1.95276	1.3975
07. S. galapagense	4	3.43386	0.078838	0.281069
07. S. galapagense	4	14.607	2.53536	1.59217
07. S. galapagense	4	20.6476	6.04053	2.45784
07. S. galapagense	5	2.61284	0.808181	0.898888
07. S. galapagense	5	7.9045	5.29166	2.30043
07. S. galapagense	5	9.61979	1.71529	1.30958
07. S. galapagense	5	10.1103	0.490512	0.700714
07. S. galapagense	5	18.9658	0.786052	0.886566
07. S. galapagense	6	2.7052	1.29501	1.13798
07. S. galapagense	6	6.99643	4.29123	2.07147
07. S. galapagense	6	9.67129	2.67486	1.63554
07. S. galapagense	6	10.9175	1.24623	1.11624
07. S. galapagense	6	13.915	2.99746	1.73118
07. S. galapagense	6	15.0306	1.11561	1.05641
07. S. galapagense	6	15.6478	0.617172	0.785493
07. S. galapagense	7	1.80998	1.20797	1.09909
07. S. galapagense	7	1.99074	0.180765	0.425441
07. S. galapagense	7	2.63893	0.648187	0.804984
07. S. galapagense	7	5.71494	3.07601	1.75385
07. S. galapagense	7	12.7652	7.05025	2.65518
07. S. galapagense	7	14.8061	2.04089	1.42864
07. S. galapagense	8	9.44627	3.86275	1.96545
07. S. galapagense	8	14.5091	5.06279	2.25011
07. S. galapagense	8	18.7987	4.28959	2.07123
07. S. galapagense	9	4.41557	0.111493	0.333167
07. S. galapagense	9	9.66869	5.25312	2.29194
07. S. galapagense	9	14.6622	4.99352	2.23473
07. S. galapagense	9	15.2292	0.567029	0.752994
07. S. galapagense	9	16.8585	1.62921	1.27632
07. S. galapagense	9	18.9574	2.09895	1.44879
07. S. galapagense	11	6.55374	0.520847	0.721803
07. S. galapagense	11	12.8826	6.32883	2.51575
07. S. galapagense	11	15.9404	3.05785	1.74871
07. S. galapagense	12	8.05301	5.98411	2.44622
07. S. galapagense	12	9.35498	1.30198	1.14105
07. S. galapagense	12	10.7421	1.3871	1.17771
07. S. galapagense	12	16.9443	6.20217	2.49038
07. S. galapagense	13	9.41457	0.199894	0.447214
07. S. galapagense	13	15.143	5.72847	2.39332
07. S. galapagense	13	20.0442	4.90116	2.21382
07. S. galapagense	13	22.8336	2.78936	1.67003
07. S. galapagense	13	24.5274	1.69384	1.30154
07. S. galapagense	13	26.0468	1.51936	1.23248
08. S. cheesmanie	2	4.69266	0.932521	0.965919
08. S. cheesmanie	2	8.12624	3.43358	1.85311
08. S. cheesmanie	2	10.6177	2.4915	1.57829
08. S. cheesmanie	2	10.8638	0.246076	0.495984
08. S. cheesmanie	2	17.5103	0.982665	0.991464
08. S. cheesmanie	2	20.1535	2.64317	1.62573
08. S. cheesmanie	3	6.8881	0.519205	0.720417
08. S. cheesmanie	3	16.3902	3.1677	1.77989
08. S. cheesmanie	4	3.9297	0.626737	0.791833
08. S. cheesmanie	4	8.27175	4.34205	2.08375
08. S. cheesmanie	4	9.4319	1.16015	1.07703
08. S. cheesmanie	4	11.038	1.60612	1.26728
08. S. cheesmanie	5	6.58764	0.809143	0.899444
08. S. cheesmanie	5	7.63001	1.04237	1.02078
08. S. cheesmanie	5	8.68823	1.05822	1.02859
08. S. cheesmanie	5	10.1017	1.41347	1.1887
08. S. cheesmanie	5	11.4643	1.36265	1.16748
08. S. cheesmanie	6	5.97907	1.05194	1.02567
08. S. cheesmanie	7	17.4549	0.263564	0.513809
08. S. cheesmanie	8	5.45494	0.948369	0.973653
08. S. cheesmanie	9	8.66322	1.82514	1.35093
08. S. cheesmanie	9	12.3993	3.73608	1.93287
08. S. cheesmanie	12	8.18787	2.44532	1.56365
08. S. cheesmanie	12	8.82978	0.641904	0.801249
08. S. cheesmanie	12	10.9439	2.11412	1.45396
08. S. cheesmanie	12	13.371	2.42715	1.55788
08. S. cheesmanie	12	14.4134	1.04237	1.02078
08. S. cheesmanie	12	16.2346	1.82118	1.34944
09. S. pimpinelifollium	1	2.4169	1.25743	1.12116
09. S. pimpinelifollium	1	5.51997	3.10307	1.76153
09. S. pimpinelifollium	1	5.73339	0.213421	0.461519
09. S. pimpinelifollium	1	10.0081	4.2747	2.06761
09. S. pimpinelifollium	1	11.1907	1.18256	1.08766
09. S. pimpinelifollium	1	15.149	3.95839	1.98947
09. S. pimpinelifollium	1	19.6801	4.53102	2.12861
09. S. pimpinelifollium	1	22.4678	2.78772	1.66973
09. S. pimpinelifollium	1	23.3525	0.884699	0.940744
09. S. pimpinelifollium	1	24.8369	1.48438	1.2182
09. S. pimpinelifollium	1	25.7925	0.955612	0.977753
09. S. pimpinelifollium	1	26.4479	0.65543	0.809321
09. S. pimpinelifollium	1	28.0032	1.5553	1.247
09. S. pimpinelifollium	1	29.0591	1.0559	1.02762
09. S. pimpinelifollium	1	32.0005	2.94143	1.71493
09. S. pimpinelifollium	1	34.1067	2.1062	1.45121
09. S. pimpinelifollium	2	0.872813	0.379019	0.61563
09. S. pimpinelifollium	2	3.14421	2.2714	1.50698
09. S. pimpinelifollium	2	5.53078	2.38657	1.54499
09. S. pimpinelifollium	2	9.65148	4.12071	2.03002
09. S. pimpinelifollium	2	11.4631	1.81162	1.34611
09. S. pimpinelifollium	2	14.3583	2.89525	1.70147
09. S. pimpinelifollium	2	16.1881	1.82978	1.35277
09. S. pimpinelifollium	2	18.2043	2.01615	1.41986
09. S. pimpinelifollium	2	24.5777	0.938124	0.968504
09. S. pimpinelifollium	2	27.9387	3.36103	1.8333
09. S. pimpinelifollium	2	29.2924	1.35376	1.16362
09. S. pimpinelifollium	3	2.03624	0.978703	0.989444
09. S. pimpinelifollium	3	2.9249	0.88866	0.942868
09. S. pimpinelifollium	3	5.11322	2.18832	1.47919
09. S. pimpinelifollium	3	13.7546	3.14025	1.772
09. S. pimpinelifollium	3	17.7749	4.0203	2.00499
09. S. pimpinelifollium	3	19.0284	1.25347	1.11937
09. S. pimpinelifollium	3	24.8498	0.334478	0.577927
09. S. pimpinelifollium	3	26.5077	1.6579	1.28763
09. S. pimpinelifollium	3	30.0355	3.52787	1.8783
09. S. pimpinelifollium	3	31.414	1.37849	1.17388
09. S. pimpinelifollium	3	33.4895	2.07546	1.44049
09. S. pimpinelifollium	4	1.83867	0.55022	0.74162
09. S. pimpinelifollium	4	4.814	2.97533	1.72482
09. S. pimpinelifollium	4	7.25795	2.44396	1.56333
09. S. pimpinelifollium	4	10.8241	3.56613	1.88839
09. S. pimpinelifollium	4	15.0189	4.19479	2.04817
09. S. pimpinelifollium	4	17.4615	2.4426	1.56301
09. S. pimpinelifollium	4	19.8329	2.3714	1.53981
09. S. pimpinelifollium	4	21.3459	1.51308	1.23004
09. S. pimpinelifollium	4	22.7132	1.36729	1.16919
09. S. pimpinelifollium	4	24.6967	1.9835	1.40819
09. S. pimpinelifollium	4	25.9875	1.29077	1.13622
09. S. pimpinelifollium	4	26.7409	0.753397	0.867756
09. S. pimpinelifollium	4	29.5319	2.791	1.67063
09. S. pimpinelifollium	5	1.91122	0.725383	0.851469
09. S. pimpinelifollium	5	2.79756	0.88634	0.941276
09. S. pimpinelifollium	5	12.149	2.10852	1.45224
09. S. pimpinelifollium	5	15.729	3.58005	1.89209
09. S. pimpinelifollium	5	26.5084	4.55479	2.13424
09. S. pimpinelifollium	5	28.1663	1.6579	1.28763
09. S. pimpinelifollium	5	30.0848	1.91847	1.38492
09. S. pimpinelifollium	5	30.6485	0.563746	0.750999
09. S. pimpinelifollium	6	4.84105	0.307426	0.554076
09. S. pimpinelifollium	6	6.3723	1.53124	1.23734
09. S. pimpinelifollium	6	7.49583	1.12353	1.06019
09. S. pimpinelifollium	6	7.96489	0.469062	0.684836
09. S. pimpinelifollium	6	11.2448	3.27987	1.81108
09. S. pimpinelifollium	6	16.8442	0.55022	0.74162
09. S. pimpinelifollium	6	18.9831	2.13885	1.46253
09. S. pimpinelifollium	6	20.3026	1.31946	1.14848
09. S. pimpinelifollium	6	20.8218	0.519206	0.720417
09. S. pimpinelifollium	6	25.1664	4.34465	2.08447
09. S. pimpinelifollium	6	25.8473	0.680842	0.825227
09. S. pimpinelifollium	6	26.6554	0.808182	0.898888
09. S. pimpinelifollium	6	29.9069	3.25146	1.80305
09. S. pimpinelifollium	6	31.2821	1.37521	1.1726
09. S. pimpinelifollium	6	32.7642	1.48206	1.21737
09. S. pimpinelifollium	6	35.565	2.80085	1.67362
09. S. pimpinelifollium	7	1.33627	0.482588	0.694982
09. S. pimpinelifollium	7	3.96167	2.6254	1.62019
09. S. pimpinelifollium	7	7.1854	3.22373	1.79555
09. S. pimpinelifollium	7	11.184	3.99857	1.99975
09. S. pimpinelifollium	7	14.7567	3.57269	1.89024
09. S. pimpinelifollium	7	16.5804	1.82378	1.35056
09. S. pimpinelifollium	7	19.0541	2.47361	1.5729
09. S. pimpinelifollium	7	19.3542	0.300182	0.547723
09. S. pimpinelifollium	7	20.7096	1.3554	1.16404
09. S. pimpinelifollium	7	23.0118	2.30213	1.51723
09. S. pimpinelifollium	7	24.039	1.02721	1.01341
09. S. pimpinelifollium	7	24.9547	0.915713	0.957079
09. S. pimpinelifollium	7	26.6763	1.72157	1.31225
09. S. pimpinelifollium	8	1.79413	0.692728	0.832466
09. S. pimpinelifollium	8	3.17426	1.38013	1.17473
09. S. pimpinelifollium	8	4.65236	1.4781	1.21573
09. S. pimpinelifollium	8	7.06666	2.4143	1.55371
09. S. pimpinelifollium	8	8.9634	1.89674	1.37732
09. S. pimpinelifollium	8	10.0058	1.04237	1.02078
09. S. pimpinelifollium	8	13.7527	3.74689	1.93572
09. S. pimpinelifollium	8	17.9479	4.19519	2.04817
09. S. pimpinelifollium	8	19.2475	1.29966	1.14018
09. S. pimpinelifollium	8	23.194	3.94651	1.98671
09. S. pimpinelifollium	8	24.6959	1.50187	1.22556
09. S. pimpinelifollium	8	28.2755	3.57965	1.89209
09. S. pimpinelifollium	8	30.0683	1.79277	1.33903
09. S. pimpinelifollium	9	2.87476	2.15334	1.46731
09. S. pimpinelifollium	9	7.33227	4.45751	2.1114
09. S. pimpinelifollium	9	8.10547	0.773205	0.879204
09. S. pimpinelifollium	9	10.144	2.03856	1.42794
09. S. pimpinelifollium	9	12.5138	2.36976	1.53948
09. S. pimpinelifollium	9	12.8061	0.292258	0.54037
09. S. pimpinelifollium	9	13.8389	1.03281	1.01637
09. S. pimpinelifollium	9	13.987	0.14811	0.384708
09. S. pimpinelifollium	9	17.0187	3.03175	1.74126
09. S. pimpinelifollium	9	18.9689	1.95016	1.39642
09. S. pimpinelifollium	9	22.0356	3.06673	1.75129
09. S. pimpinelifollium	9	23.262	1.22642	1.10725
09. S. pimpinelifollium	9	24.1698	0.907789	0.95289
09. S. pimpinelifollium	9	25.9726	1.80273	1.34276
09. S. pimpinelifollium	9	27.832	1.85944	1.36345
09. S. pimpinelifollium	9	30.7807	2.94867	1.71727
09. S. pimpinelifollium	9	31.636	0.855325	0.924662
09. S. pimpinelifollium	10	2.18532	1.60476	1.26689
09. S. pimpinelifollium	10	7.0713	4.88599	2.21043
09. S. pimpinelifollium	10	7.88509	0.813785	0.902219
09. S. pimpinelifollium	10	9.23257	1.34748	1.1606
09. S. pimpinelifollium	10	13.1708	3.93818	1.98444
09. S. pimpinelifollium	10	16.8118	3.641	1.90814
09. S. pimpinelifollium	10	17.894	1.08227	1.04019
09. S. pimpinelifollium	10	18.723	0.828952	0.910494
09. S. pimpinelifollium	10	20.2024	1.47946	1.21614
09. S. pimpinelifollium	10	22.7226	2.52019	1.58745
09. S. pimpinelifollium	10	22.8572	0.134584	0.367423
09. S. pimpinelifollium	11	2.00591	1.38874	1.17856
09. S. pimpinelifollium	11	3.43454	1.42863	1.19541
09. S. pimpinelifollium	11	5.73503	2.30049	1.51658
09. S. pimpinelifollium	11	6.71045	0.975421	0.987421
09. S. pimpinelifollium	11	8.18991	1.47946	1.21614
09. S. pimpinelifollium	11	9.47044	1.28053	1.13181
09. S. pimpinelifollium	11	12.1364	2.66598	1.63279
09. S. pimpinelifollium	11	14.4161	2.27972	1.50997
09. S. pimpinelifollium	11	18.017	3.60082	1.89763
09. S. pimpinelifollium	11	19.2615	1.24459	1.1158
09. S. pimpinelifollium	11	19.8962	0.63466	0.796869
09. S. pimpinelifollium	11	27.653	1.83075	1.35314
09. S. pimpinelifollium	11	28.0337	0.38066	0.617252
09. S. pimpinelifollium	11	30.2497	2.21605	1.48862
09. S. pimpinelifollium	11	31.7236	1.47386	1.21408
09. S. pimpinelifollium	11	33.8218	2.09827	1.44845
09. S. pimpinelifollium	13	3.73733	1.87953	1.37113
09. S. pimpinelifollium	13	8.15154	4.41421	2.10095
09. S. pimpinelifollium	13	11.7708	3.61927	1.90237
09. S. pimpinelifollium	13	13.9159	2.14513	1.46458
09. S. pimpinelifollium	13	15.3142	1.3983	1.18237
09. S. pimpinelifollium	13	17.3475	2.03324	1.42583
09. S. pimpinelifollium	13	19.3289	1.98146	1.40748
09. S. pimpinelifollium	13	22.3353	3.00634	1.73378
09. S. pimpinelifollium	13	23.1754	0.840158	0.916515
09. S. pimpinelifollium	13	24.4807	1.30526	1.14237
09. S. pimpinelifollium	13	28.4621	3.98137	1.99524
09. S. pimpinelifollium	13	30.6395	2.17739	1.47547
09. S. pimpinelifollium	13	31.8276	1.18816	1.08995
09. S. pimpinelifollium	13	33.062	1.23434	1.11086
09. S. pimpinelifollium	13	34.9237	1.86176	1.36455
09. S. pimpinelifollium	14	1.95973	1.47318	1.21367
09. S. pimpinelifollium	14	4.51121	2.55149	1.59719
09. S. pimpinelifollium	14	7.70364	3.19243	1.78662
09. S. pimpinelifollium	14	9.78375	2.0801	1.44222
09. S. pimpinelifollium	14	11.0484	1.26468	1.12472
09. S. pimpinelifollium	14	11.6584	0.609928	0.781025
09. S. pimpinelifollium	14	14.9269	3.26855	1.80804
09. S. pimpinelifollium	14	15.204	0.277091	0.526308
09. S. pimpinelifollium	14	18.1133	2.90934	1.70558
09. S. pimpinelifollium	14	20.582	2.46869	1.57131
09. S. pimpinelifollium	14	24.7989	4.21692	2.05353
09. S. pimpinelifollium	14	25.0968	0.297861	0.545894
09. S. pimpinelifollium	14	27.965	2.8682	1.69352
09. S. pimpinelifollium	14	29.7384	1.77336	1.33154
09. S. pimpinelifollium	14	33.1195	3.38112	1.83875
09. S. pimpinelifollium	14	33.7502	0.630698	0.794355
09. S. pimpinelifollium	18	2.03064	0.967498	0.983362
09. S. pimpinelifollium	18	4.07645	2.04581	1.43038
09. S. pimpinelifollium	18	6.47722	2.40078	1.54952
09. S. pimpinelifollium	18	7.862	1.38477	1.17686
09. S. pimpinelifollium	18	9.27779	1.41579	1.18996
09. S. pimpinelifollium	18	11.5512	2.27343	1.50765
09. S. pimpinelifollium	18	12.2862	0.734948	0.857321
09. S. pimpinelifollium	18	14.461	2.17479	1.47479
09. S. pimpinelifollium	18	15.7009	1.23995	1.11355
09. S. pimpinelifollium	18	17.7516	2.05073	1.43213
09. S. pimpinelifollium	18	19.9792	2.22753	1.49265
09. S. pimpinelifollium	18	22.9186	2.93939	1.71435
09. S. pimpinelifollium	18	24.5431	1.62457	1.27475
09. S. pimpinelifollium	18	25.9368	1.39366	1.18068
09. S. pimpinelifollium	18	26.737	0.800259	0.894427
09. S. pimpinelifollium	18	30.8847	4.14764	2.03666
09. S. pimpinelifollium	18	31.4079	0.523168	0.723187
09. S. pimpinelifollium	19	1.81722	0.846441	0.919783
09. S. pimpinelifollium	19	3.63048	1.81326	1.34648
09. S. pimpinelifollium	19	5.37446	1.74399	1.32061
09. S. pimpinelifollium	19	6.86909	1.49463	1.2227
09. S. pimpinelifollium	19	10.5807	3.71164	1.92666
09. S. pimpinelifollium	19	11.7577	1.17696	1.0849
09. S. pimpinelifollium	19	14.2455	2.48782	1.57734
09. S. pimpinelifollium	19	15.209	0.963536	0.981835
09. S. pimpinelifollium	19	18.8689	3.65985	1.91311
09. S. pimpinelifollium	19	19.5108	0.641904	0.801249
09. S. pimpinelifollium	19	20.6742	1.16343	1.07842
09. S. pimpinelifollium	19	22.5607	1.88649	1.37332
09. S. pimpinelifollium	19	25.9013	3.34054	1.82784
09. S. pimpinelifollium	19	26.2014	0.300182	0.547723
09. S. pimpinelifollium	19	34.2528	2.8682	1.69352
09. S. pimpinelifollium	19	35.851	1.59819	1.26412
09. S. pimpinelifollium	19	37.9038	2.05277	1.43283
09. S. pimpinelifollium	20	1.96861	0.586838	0.766159
09. S. pimpinelifollium	20	3.72544	1.75683	1.32552
09. S. pimpinelifollium	20	5.34113	1.61568	1.27122
09. S. pimpinelifollium	20	6.31259	0.971459	0.985393
09. S. pimpinelifollium	20	8.51907	2.20648	1.48526
09. S. pimpinelifollium	20	10.3848	1.86572	1.36602
09. S. pimpinelifollium	20	14.2881	3.90333	1.9756
09. S. pimpinelifollium	20	18.7891	4.50097	2.12156
09. S. pimpinelifollium	20	21.0341	2.24502	1.49833
09. S. pimpinelifollium	20	28.0573	0.222986	0.472229
09. S. pimpinelifollium	20	30.0583	2.00099	1.41457
09. S. pimpinelifollium	20	32.5316	2.47333	1.57258
09. S. pimpinelifollium	20	32.6471	0.115454	0.339116
09. S. pimpinelifollium	20	38.6466	0.998511	0.9995
09. S. pimpinelifollium	21	3.95075	2.64781	1.62727
09. S. pimpinelifollium	21	6.07375	2.123	1.45705
09. S. pimpinelifollium	21	7.78972	1.71597	1.30996
09. S. pimpinelifollium	21	8.56293	0.773205	0.879204
09. S. pimpinelifollium	21	11.2543	2.69139	1.64043
09. S. pimpinelifollium	21	12.5659	1.31154	1.14543
09. S. pimpinelifollium	21	16.7723	4.20639	2.05085
09. S. pimpinelifollium	21	19.363	2.59071	1.60966
09. S. pimpinelifollium	21	21.7106	2.34763	1.53232
09. S. pimpinelifollium	21	23.3151	1.60448	1.26649
09. S. pimpinelifollium	21	24.4514	1.13638	1.06583
09. S. pimpinelifollium	21	25.5941	1.14266	1.06911
09. S. pimpinelifollium	21	30.4134	4.81932	2.19522
09. S. pimpinelifollium	21	31.2513	0.837837	0.915423
09. S. pimpinelifollium	21	34.1484	2.89717	1.70206
09. S. pimpinelifollium	22	4.60086	2.27536	1.50831
09. S. pimpinelifollium	22	5.1877	0.586837	0.766159
09. S. pimpinelifollium	22	7.45581	2.26811	1.50599
09. S. pimpinelifollium	22	11.2673	3.81152	1.95243
09. S. pimpinelifollium	22	13.0641	1.79673	1.34052
09. S. pimpinelifollium	22	13.1795	0.115455	0.339116
09. S. pimpinelifollium	22	15.2876	2.10812	1.4519
09. S. pimpinelifollium	22	17.5495	2.26183	1.50399
09. S. pimpinelifollium	22	19.1757	1.62621	1.27515
09. S. pimpinelifollium	22	20.9708	1.79509	1.33978
09. S. pimpinelifollium	22	21.0496	0.078837	0.281069
09. S. pimpinelifollium	22	22.4066	1.35704	1.1649
09. S. pimpinelifollium	22	24.3146	1.90794	1.3813
09. S. pimpinelifollium	22	24.9971	0.682483	0.825833
09. S. pimpinelifollium	22	26.3284	1.33135	1.15369
09. S. pimpinelifollium	22	27.2808	0.95233	0.975705
09. S. pimpinelifollium	22	30.2901	3.00934	1.73465
09. S. pimpinelifollium	22	31.1365	0.84644	0.919783
09. S. pimpinelifollium	22	32.926	1.78949	1.33754
09. S. pimpinelifollium	22	35.2146	2.2886	1.51294
10_"Ailsa Craig"	1	1.57278	0.776488	0.880909
10_"Ailsa Craig"	1	3.8894	2.31662	1.52217
10_"Ailsa Craig"	1	7.26752	3.37812	1.83793
10_"Ailsa Craig"	1	8.02159	0.754076	0.868332
10_"Ailsa Craig"	1	12.1851	4.16349	2.04034
10_"Ailsa Craig"	1	12.4853	0.300182	0.547723
10_"Ailsa Craig"	1	14.3694	1.88417	1.37259
10_"Ailsa Craig"	1	14.7692	0.39979	0.632456
10_"Ailsa Craig"	1	18.4608	3.69155	1.92146
10_"Ailsa Craig"	1	20.2787	1.8179	1.34833
10_"Ailsa Craig"	1	20.567	0.288296	0.536656
10_"Ailsa Craig"	1	22.5139	1.94688	1.39535
10_"Ailsa Craig"	1	23.3603	0.84644	0.919783
10_"Ailsa Craig"	2	1.52496	0.346363	0.588218
10_"Ailsa Craig"	2	3.33822	1.81326	1.34648
10_"Ailsa Craig"	2	3.50546	0.167239	0.408656
10_"Ailsa Craig"	2	4.61546	1.11001	1.05357
10_"Ailsa Craig"	2	4.98096	0.365493	0.604152
10_"Ailsa Craig"	2	5.61329	0.632339	0.794984
10_"Ailsa Craig"	2	8.55597	2.94267	1.71552
10_"Ailsa Craig"	2	9.66529	1.10933	1.05309
10_"Ailsa Craig"	2	12.9051	3.23986	1.8
10_"Ailsa Craig"	2	13.5629	0.657751	0.811172
10_"Ailsa Craig"	2	15.3771	1.81422	1.34685
10_"Ailsa Craig"	2	15.9504	0.573311	0.756968
10_"Ailsa Craig"	2	18.4296	2.47921	1.57448
10_"Ailsa Craig"	2	19.8725	1.44284	1.20125
10_"Ailsa Craig"	2	22.5434	2.6709	1.63432
10_"Ailsa Craig"	3	3.82081	1.40555	1.18575
10_"Ailsa Craig"	3	6.78233	2.96152	1.72105
10_"Ailsa Craig"	3	6.87073	0.088402	0.296648
10_"Ailsa Craig"	3	7.85572	0.984986	0.992472
10_"Ailsa Craig"	3	8.78824	0.932521	0.965919
10_"Ailsa Craig"	3	12.8834	4.09518	2.02361
10_"Ailsa Craig"	3	15.8221	2.93871	1.71435
10_"Ailsa Craig"	3	17.9731	2.15102	1.46663
10_"Ailsa Craig"	3	19.284	1.31086	1.14499
10_"Ailsa Craig"	3	21.283	1.99895	1.41386
10_"Ailsa Craig"	3	23.7391	2.45612	1.56716
10_"Ailsa Craig"	4	4.27402	1.50815	1.22801
10_"Ailsa Craig"	4	4.32977	0.055747	0.236643
10_"Ailsa Craig"	4	5.13399	0.80422	0.89666
10_"Ailsa Craig"	4	7.96653	2.83254	1.68315
10_"Ailsa Craig"	4	14.5482	0.161637	0.402492
10_"Ailsa Craig"	4	18.8822	4.33401	2.08183
10_"Ailsa Craig"	5	5.0796	2.30609	1.51855
10_"Ailsa Craig"	5	7.9985	2.9189	1.70851
10_"Ailsa Craig"	5	10.7452	2.74674	1.65741
10_"Ailsa Craig"	5	12.6802	1.93499	1.39104
10_"Ailsa Craig"	5	12.9725	0.292259	0.54037
10_"Ailsa Craig"	5	14.5133	1.54081	1.24137
10_"Ailsa Craig"	5	16.3025	1.78921	1.33754
10_"Ailsa Craig"	5	16.9022	0.599684	0.774597
10_"Ailsa Craig"	5	20.1936	3.29136	1.81411
10_"Ailsa Craig"	5	20.8051	0.611569	0.782304
10_"Ailsa Craig"	5	22.1566	1.35144	1.16233
10_"Ailsa Craig"	5	25.6096	3.45299	1.85822
10_"Ailsa Craig"	5	26.5381	0.928559	0.963846
10_"Ailsa Craig"	5	27.8058	1.26768	1.12606
10_"Ailsa Craig"	6	8.30633	0.974741	0.987421
10_"Ailsa Craig"	6	12.0298	3.72352	1.92977
10_"Ailsa Craig"	6	13.2642	1.23434	1.11086
10_"Ailsa Craig"	6	13.9991	0.734947	0.857321
10_"Ailsa Craig"	6	16.6842	2.68511	1.6386
10_"Ailsa Craig"	6	17.3938	0.709535	0.842615
10_"Ailsa Craig"	6	18.0555	0.661713	0.813634
10_"Ailsa Craig"	6	21.8839	3.82845	1.95653
10_"Ailsa Craig"	6	23.6134	1.7295	1.31491
10_"Ailsa Craig"	6	26.6617	3.04828	1.74585
10_"Ailsa Craig"	6	29.4065	2.74482	1.6568
10_"Ailsa Craig"	6	30.0795	0.672919	0.820366
10_"Ailsa Craig"	6	33.576	3.49657	1.87003
10_"Ailsa Craig"	7	12.8937	0.254	0.503984
10_"Ailsa Craig"	7	16.5752	3.68158	1.91885
10_"Ailsa Craig"	7	17.6391	1.06382	1.0315
10_"Ailsa Craig"	7	18.4871	0.848082	0.920869
10_"Ailsa Craig"	7	18.5795	0.092363	0.303315
10_"Ailsa Craig"	7	19.4316	0.852043	0.923038
10_"Ailsa Craig"	7	20.3799	0.948368	0.973653
10_"Ailsa Craig"	7	22.8252	2.44532	1.56365
10_"Ailsa Craig"	7	24.9895	2.16426	1.47105
10_"Ailsa Craig"	7	26.0725	1.08295	1.04067
10_"Ailsa Craig"	7	28.4676	2.39517	1.54758
10_"Ailsa Craig"	7	30.784	2.31633	1.52184
10_"Ailsa Craig"	8	1.48274	0.328875	0.573585
10_"Ailsa Craig"	8	2.27904	0.796297	0.892188
10_"Ailsa Craig"	8	10.268	2.69864	1.64286
10_"Ailsa Craig"	8	11.6656	1.39762	1.18237
10_"Ailsa Craig"	8	12.9573	1.29173	1.13666
10_"Ailsa Craig"	8	14.2952	1.33791	1.15672
10_"Ailsa Craig"	8	16.6884	2.39313	1.54693
10_"Ailsa Craig"	8	19.3626	2.67419	1.63524
10_"Ailsa Craig"	8	20.6734	1.31086	1.14499
10_"Ailsa Craig"	8	21.7827	1.10932	1.05309
10_"Ailsa Craig"	8	23.182	1.39926	1.18279
10_"Ailsa Craig"	9	3.33986	1.66051	1.2888
10_"Ailsa Craig"	9	4.90868	1.56882	1.2526
10_"Ailsa Craig"	9	6.20902	1.30034	1.14018
10_"Ailsa Craig"	9	8.71896	2.50995	1.5843
10_"Ailsa Craig"	9	19.7189	4.32717	2.08014
10_"Ailsa Craig"	9	22.0665	2.34763	1.53232
10_"Ailsa Craig"	9	25.0379	2.97137	1.72366
10_"Ailsa Craig"	10	2.57198	0.463459	0.680441
10_"Ailsa Craig"	10	3.62391	1.05194	1.02567
10_"Ailsa Craig"	10	5.33988	1.71597	1.30996
10_"Ailsa Craig"	10	5.40916	0.069273	0.262679
10_"Ailsa Craig"	10	8.73945	3.3303	1.82483
10_"Ailsa Craig"	10	10.2453	1.50583	1.22719
10_"Ailsa Craig"	10	10.3472	0.101928	0.319374
10_"Ailsa Craig"	10	12.6899	2.34271	1.53069
10_"Ailsa Craig"	10	12.8149	0.125019	0.353553
10_"Ailsa Craig"	10	15.3767	2.56173	1.60062
10_"Ailsa Craig"	11	2.40174	1.41115	1.18786
10_"Ailsa Craig"	11	3.71724	1.3155	1.14717
10_"Ailsa Craig"	11	6.8173	3.10007	1.76068
10_"Ailsa Craig"	11	18.0441	2.03788	1.42759
10_"Ailsa Craig"	11	18.2288	0.184728	0.430116
10_"Ailsa Craig"	11	20.77	2.54124	1.59405
10_"Ailsa Craig"	11	21.278	0.508	0.712741
10_"Ailsa Craig"	11	22.1987	0.920636	0.959687
10_"Ailsa Craig"	11	24.0891	1.89045	1.37477
10_"Ailsa Craig"	11	25.1674	1.07831	1.03827
10_"Ailsa Craig"	11	26.9672	1.79973	1.34164
10_"Ailsa Craig"	13	1.19444	0.111493	0.333167
10_"Ailsa Craig"	13	2.4199	1.22546	1.1068
10_"Ailsa Craig"	13	3.06973	0.649827	0.806226
10_"Ailsa Craig"	13	3.77763	0.707895	0.841427
10_"Ailsa Craig"	13	5.1083	1.33067	1.15369
10_"Ailsa Craig"	13	6.59336	1.48506	1.21861
10_"Ailsa Craig"	13	8.47029	1.87693	1.37004
10_"Ailsa Craig"	13	10.3647	1.89442	1.37623
10_"Ailsa Craig"	13	10.934	0.569349	0.754321
10_"Ailsa Craig"	13	12.4989	1.56486	1.251
10_"Ailsa Craig"	13	13.1312	0.632339	0.794984
10_"Ailsa Craig"	13	14.9231	1.79181	1.33866
10_"Ailsa Craig"	13	15.4541	0.531091	0.728697
10_"Ailsa Craig"	13	17.4937	2.03952	1.42829
10_"Ailsa Craig"	14	3.41174	1.08063	1.03971
10_"Ailsa Craig"	14	4.28059	0.868851	0.932202
10_"Ailsa Craig"	14	5.55551	1.27492	1.12916
10_"Ailsa Craig"	14	8.31646	2.76095	1.66163
10_"Ailsa Craig"	14	8.93595	0.619493	0.786766
10_"Ailsa Craig"	14	10.7881	1.8522	1.36088
10_"Ailsa Craig"	14	11.5264	0.73823	0.859069
10_"Ailsa Craig"	14	13.8803	2.35391	1.53428
10_"Ailsa Craig"	14	14.2959	0.415636	0.644981
10_"Ailsa Craig"	14	16.3473	2.05141	1.43213
10_"Ailsa Craig"	14	16.4031	0.055746	0.236643
10_"Ailsa Craig"	14	18.214	1.81094	1.34573
10_"Ailsa Craig"	14	19.266	1.05194	1.02567
10_"Ailsa Craig"	14	20.4261	1.16015	1.07703
10_"Ailsa Craig"	15	1.8235	0.203856	0.451664
10_"Ailsa Craig"	15	3.2132	1.3897	1.17898
10_"Ailsa Craig"	15	4.08273	0.869531	0.932738
10_"Ailsa Craig"	15	4.62271	0.539976	0.734847
10_"Ailsa Craig"	15	5.48663	0.863928	0.929516
10_"Ailsa Craig"	15	6.82059	1.33395	1.15499
10_"Ailsa Craig"	15	8.36304	1.54245	1.24177
10_"Ailsa Craig"	15	10.0658	1.70273	1.30499
10_"Ailsa Craig"	15	13.71	3.64428	1.90893
10_"Ailsa Craig"	15	17.483	3.77299	1.94242
10_"Ailsa Craig"	15	19.1937	1.71065	1.30805
10_"Ailsa Craig"	16	2.50134	1.36333	1.16748
10_"Ailsa Craig"	16	3.74989	1.24855	1.11759
10_"Ailsa Craig"	16	6.53653	2.78664	1.66943
10_"Ailsa Craig"	16	11.1072	4.57064	2.13799
10_"Ailsa Craig"	16	14.5156	3.40845	1.84608
10_"Ailsa Craig"	16	14.6406	0.125019	0.353553
10_"Ailsa Craig"	16	17.3603	2.71969	1.64924
10_"Ailsa Craig"	16	18.4855	1.12517	1.06066
10_"Ailsa Craig"	16	22.0085	3.52295	1.87697
10_"Ailsa Craig"	16	23.5103	1.50187	1.22556
10_"Ailsa Craig"	18	0.705574	0.320952	0.566569
10_"Ailsa Craig"	18	1.61172	0.906148	0.95184
10_"Ailsa Craig"	18	2.53468	0.922957	0.960729
10_"Ailsa Craig"	18	3.73801	1.20333	1.09681
10_"Ailsa Craig"	18	4.50329	0.765282	0.874643
10_"Ailsa Craig"	18	6.04834	1.54505	1.24298
10_"Ailsa Craig"	18	6.14071	0.092364	0.303315
10_"Ailsa Craig"	18	8.13173	1.99102	1.41103
10_"Ailsa Craig"	18	9.23477	1.10304	1.05024
10_"Ailsa Craig"	18	10.8409	1.60612	1.26728
10_"Ailsa Craig"	18	14.3137	3.4728	1.8636
10_"Ailsa Craig"	19	4.48705	3.27251	1.80914
10_"Ailsa Craig"	19	5.41957	0.932521	0.965919
10_"Ailsa Craig"	19	7.54121	2.12165	1.45671
10_"Ailsa Craig"	19	8.68087	1.13966	1.06771
10_"Ailsa Craig"	19	8.85207	0.171201	0.413521
10_"Ailsa Craig"	19	10.5347	1.68263	1.2973
10_"Ailsa Craig"	19	11.6559	1.12121	1.05877
10_"Ailsa Craig"	19	13.9343	2.27836	1.5093
10_"Ailsa Craig"	19	14.7131	0.778808	0.88261
10_"Ailsa Craig"	19	15.9451	1.23202	1.10995
10_"Ailsa Craig"	19	16.2684	0.323273	0.568331
10_"Ailsa Craig"	20	2.15266	1.40322	1.18448
10_"Ailsa Craig"	20	2.22193	0.069273	0.262679
10_"Ailsa Craig"	20	4.3914	2.16947	1.47275
10_"Ailsa Craig"	20	5.71975	1.32835	1.15239
10_"Ailsa Craig"	20	12.3966	1.15222	1.07331
10_"Ailsa Craig"	20	13.6276	1.23106	1.1095
10_"Ailsa Craig"	20	16.1383	2.51063	1.58461
10_"Ailsa Craig"	20	16.2729	0.134584	0.367423
10_"Ailsa Craig"	20	17.7635	1.49066	1.22107
10_"Ailsa Craig"	21	2.35487	1.27424	1.12872
10_"Ailsa Craig"	21	3.08586	0.730985	0.854985
10_"Ailsa Craig"	21	6.06447	2.97861	1.72598
10_"Ailsa Craig"	21	6.20302	0.138545	0.372827
10_"Ailsa Craig"	21	8.62813	2.42511	1.55724
10_"Ailsa Craig"	21	9.33602	0.707894	0.841427
10_"Ailsa Craig"	21	9.7589	0.422881	0.650385
10_"Ailsa Craig"	21	12.0788	2.3199	1.52315
10_"Ailsa Craig"	21	14.5046	2.42579	1.55756
10_"Ailsa Craig"	21	14.6662	0.161637	0.402492
10_"Ailsa Craig"	21	15.762	1.0958	1.0469
10_"Ailsa Craig"	21	17.8435	2.08146	1.44257
10_"Ailsa Craig"	21	18.4917	0.648186	0.804984
10_"Ailsa Craig"	21	19.9737	1.48206	1.21737
10_"Ailsa Craig"	22	4.51614	2.28628	1.51195
10_"Ailsa Craig"	22	6.60677	2.09063	1.44603
10_"Ailsa Craig"	22	8.07994	1.47318	1.21367
10_"Ailsa Craig"	22	9.77446	1.69452	1.30192
10_"Ailsa Craig"	22	11.7398	1.96533	1.40178
10_"Ailsa Craig"	22	12.2145	0.474664	0.689202
10_"Ailsa Craig"	22	14.8303	2.61584	1.61741
10_"Ailsa Craig"	22	15.9189	1.08855	1.04355
10_"Ailsa Craig"	22	17.7855	1.86668	1.36638
11_"Craigella"	2	2.36444	1.84359	1.35794
11_"Craigella"	2	10.1807	1.88321	1.37222
11_"Craigella"	2	13.4216	3.24093	1.80028
11_"Craigella"	2	13.51	0.088402	0.296648
11_"Craigella"	2	14.62	1.11	1.05357
11_"Craigella"	2	15.5047	0.884699	0.940744
11_"Craigella"	2	16.4316	0.926918	0.962808
11_"Craigella"	2	17.3968	0.965177	0.982344
11_"Craigella"	2	17.5911	0.194292	0.440454
11_"Craigella"	2	18.991	1.39994	1.18322
11_"Craigella"	2	19.1527	0.161636	0.402492
11_"Craigella"	2	20.5064	1.35376	1.16362
11_"Craigella"	2	20.7238	0.217382	0.465833
11_"Craigella"	2	22.2105	1.4867	1.21943
11_"Craigella"	2	23.7411	1.53056	1.23734
11_"Craigella"	2	24.0412	0.300182	0.547723
11_"Craigella"	3	4.56396	3.17986	1.78326
11_"Craigella"	3	6.28718	1.72322	1.31263
11_"Craigella"	3	8.39569	2.10852	1.45224
11_"Craigella"	3	11.1883	2.79264	1.67123
11_"Craigella"	3	13.5525	2.36416	1.53753
11_"Craigella"	3	14.8568	1.3043	1.14193
11_"Craigella"	3	20.4216	0.399789	0.632456
11_"Craigella"	3	22.2005	1.77896	1.33379
11_"Craigella"	3	23.2096	1.00904	1.00449
11_"Craigella"	3	24.5234	1.31386	1.1463
11_"Craigella"	3	31.8569	3.37319	1.83657
11_"Craigella"	3	32.9765	1.11957	1.0583
11_"Craigella"	12	3.8838	0.95233	0.975705
11_"Craigella"	12	4.61642	0.732626	0.856154
11_"Craigella"	12	6.8001	2.18367	1.47784
11_"Craigella"	12	8.76243	1.96233	1.40071
11_"Craigella"	12	10.6809	1.91847	1.38492
11_"Craigella"	12	12.858	2.17711	1.47547
11_"Craigella"	12	14.5845	1.7265	1.31377
11_"Craigella"	12	16.5657	1.98118	1.40748
11_"Craigella"	12	17.3174	0.751756	0.867179
11_"Craigella"	12	17.7562	0.438727	0.662571
11_"Craigella"	12	19.1911	1.43492	1.19791
11_"Craigella"	12	19.5582	0.367134	0.605805
11_"Craigella"	12	21.5562	1.99798	1.41351
11_"Craigella"	12	22.3739	0.817747	0.904434
11_"Craigella"	12	24.1315	1.75751	1.3259
11_"Craigella"	12	24.7048	0.573311	0.756968
11_"Craigella"	13	2.59139	1.14922	1.07191
11_"Craigella"	13	3.5183	0.926919	0.962808
11_"Craigella"	13	3.88776	0.369454	0.607454
11_"Craigella"	13	5.29166	1.4039	1.18491
11_"Craigella"	13	6.15327	0.861608	0.92844
11_"Craigella"	13	8.06353	1.91026	1.38203
11_"Craigella"	13	9.84414	1.7806	1.33454
11_"Craigella"	13	14.9157	0.649828	0.806226
11_"Craigella"	13	15.0272	0.111492	0.333167
11_"Craigella"	13	17.6538	2.62665	1.6208
11_"Craigella"	13	18.6454	0.991549	0.995992
11_"Craigella"	13	18.8222	0.176804	0.420714
11_"Craigella"	14	3.18711	0.915034	0.956556
11_"Craigella"	14	4.4373	1.25019	1.11803
11_"Craigella"	14	6.74599	2.30869	1.51954
11_"Craigella"	14	9.25458	2.50859	1.58398
11_"Craigella"	14	9.97928	0.724703	0.851469
11_"Craigella"	14	11.4756	1.49627	1.22311
11_"Craigella"	14	11.6468	0.171201	0.413521
11_"Craigella"	14	14.1089	2.46212	1.56908
11_"Craigella"	14	15.4913	1.38245	1.17558
11_"Craigella"	14	18.0108	2.51951	1.58745
11_"Craigella"	14	19.3725	1.36168	1.16705
11_"Craigella"	14	20.7764	1.4039	1.18491
11_"Craigella"	15	3.35735	0.822669	0.907193
11_"Craigella"	15	4.33673	0.979383	0.989444
11_"Craigella"	15	4.72135	0.384622	0.620484
11_"Craigella"	15	7.18512	2.46377	1.56971
11_"Craigella"	15	9.07953	1.89442	1.37623
11_"Craigella"	15	16.4329	2.69796	1.64256
11_"Craigella"	16	2.46869	1.29966	1.14018
11_"Craigella"	16	3.14557	0.67688	0.8228
11_"Craigella"	16	3.71888	0.573311	0.756968
11_"Craigella"	16	4.62831	0.90943	0.953415
11_"Craigella"	16	6.0982	1.4699	1.21244
11_"Craigella"	16	7.34443	1.24623	1.11624
11_"Craigella"	16	8.24662	0.902187	0.949737
11_"Craigella"	16	8.64081	0.394186	0.627694
11_"Craigella"	16	10.0988	1.45801	1.20748
11_"Craigella"	16	11.5552	1.45637	1.20665
11_"Craigella"	16	12.5402	0.984986	0.992472
11_"Craigella"	16	13.8389	1.29869	1.13974
11_"Craigella"	16	14.4656	0.626737	0.791833
11_"Craigella"	16	14.9601	0.494474	0.702851
11_"Craigella"	17	4.10022	0.682483	0.825833
11_"Craigella"	17	5.09477	0.99455	0.997497
11_"Craigella"	17	6.05598	0.961215	0.980306
11_"Craigella"	17	7.87388	1.8179	1.34833
11_"Craigella"	17	7.98934	0.115455	0.339116
11_"Craigella"	17	9.66869	1.67935	1.29576
11_"Craigella"	17	11.9797	2.31101	1.5202
11_"Craigella"	17	13.9737	1.99402	1.41209
11_"Craigella"	18	2.55341	0.503359	0.709225
11_"Craigella"	18	2.84567	0.292258	0.54037
11_"Craigella"	18	3.65317	0.807502	0.898888
11_"Craigella"	18	4.1318	0.478627	0.692098
11_"Craigella"	18	4.94722	0.815425	0.902774
11_"Craigella"	18	5.43541	0.488191	0.69857
11_"Craigella"	18	6.49527	1.05986	1.02956
11_"Craigella"	18	6.82019	0.324914	0.570088
11_"Craigella"	18	7.71281	0.892622	0.944987
11_"Craigella"	18	7.79165	0.078837	0.281069
11_"Craigella"	18	9.36115	1.5695	1.253
11_"Craigella"	18	9.57853	0.217382	0.465833
11_"Craigella"	18	10.7308	1.15223	1.07331
11_"Craigella"	19	2.96808	2.1144	1.45396
11_"Craigella"	19	3.95799	0.989908	0.994987
11_"Craigella"	19	5.15968	1.20169	1.09636
11_"Craigella"	19	6.28417	1.12449	1.06019
11_"Craigella"	19	8.15714	1.87297	1.36858
11_"Craigella"	19	8.65886	0.501718	0.70852
11_"Craigella"	19	9.27371	0.614851	0.784219
11_"Craigella"	19	10.6314	1.35772	1.16533
11_"Craigella"	19	10.7525	0.121057	0.347851
11_"Craigella"	23	3.3844	0.531091	0.728697
11_"Craigella"	23	4.12823	0.743832	0.862554
11_"Craigella"	23	4.83052	0.702292	0.837854
11_"Craigella"	23	5.39591	0.565387	0.751665
11_"Craigella"	23	7.35032	1.95441	1.39786
11_"Craigella"	23	8.19047	0.840157	0.916515
11_"Craigella"	23	8.72881	0.538335	0.733485
11_"Craigella"	23	9.81901	1.0902	1.04403
11_"Craigella"	23	10.6193	0.800258	0.894427
11_"Craigella"	23	11.9437	1.32439	1.15065
11_"Craigella"	23	13.1437	1.20005	1.09545
11_"Craigella"	24	1.61568	0.707895	0.841427
11_"Craigella"	24	3.48141	1.86572	1.36602
11_"Craigella"	24	3.61599	0.134584	0.367423
11_"Craigella"	24	4.81604	1.20005	1.09545
11_"Craigella"	24	6.97074	2.1547	1.46799
11_"Craigella"	24	7.80365	0.832913	0.912688
11_"Craigella"	24	7.92471	0.121058	0.347851
11_"Craigella"	24	9.46387	1.53917	1.24056
11_"Craigella"	24	9.55228	0.088402	0.296648
11_"Craigella"	24	10.6352	1.08295	1.04067
11_"Craigella"	24	12.1704	1.5352	1.23895
11_"Craigella"	24	12.4261	0.255642	0.505964
11_"Craigella"	24	13.6842	1.25811	1.12161
11_"Craigella"	24	14.7671	1.08295	1.04067
11_"Craigella"	24	16.0054	1.23831	1.11265
11_"Craigella"	25	1.39598	0.461818	0.679706
11_"Craigella"	25	3.09871	1.70273	1.30499
11_"Craigella"	25	3.22373	0.125019	0.353553
11_"Craigella"	25	4.30764	1.08391	1.04115
11_"Craigella"	25	6.48407	2.17643	1.47513
11_"Craigella"	25	8.07502	1.59095	1.26135
11_"Craigella"	25	9.11904	1.04401	1.02176
11_"Craigella"	25	10.0921	0.9731	0.986408
11_"Craigella"	25	12.106	2.01383	1.41915
11_"Craigella"	26	3.24682	0.319311	0.564801
11_"Craigella"	26	4.69526	1.44844	1.20333
11_"Craigella"	26	5.22007	0.524809	0.724569
11_"Craigella"	26	5.83	0.609928	0.781025
11_"Craigella"	26	7.23062	1.40062	1.18364
11_"Craigella"	26	7.31902	0.088402	0.296648
11_"Craigella"	26	8.64805	1.32903	1.15282
11_"Craigella"	26	8.85587	0.207818	0.45607
11_"Craigella"	26	9.30976	0.453895	0.673795
11_"Craigella"	27	2.885	2.25991	1.50333
11_"Craigella"	27	3.82381	0.938804	0.96902
11_"Craigella"	27	6.27433	2.45052	1.56557
11_"Craigella"	27	7.23062	0.956292	0.977753
11_"Craigella"	27	8.7836	1.55297	1.24619
11_"Craigella"	27	10.7083	1.92475	1.38744
11_"Craigella"	27	10.8007	0.092363	0.303315
11_"Craigella"	27	12.993	2.19228	1.48054
11_"Craigella"	27	14.4454	1.45241	1.20499
11_"Craigella"	27	16.89	2.44464	1.56365
11_"Craigella"	28	2.40338	0.426842	0.653452
11_"Craigella"	28	4.4373	2.03392	1.42618
11_"Craigella"	28	5.49252	1.05522	1.02713
11_"Craigella"	28	5.8326	0.340081	0.583095
11_"Craigella"	28	9.19391	3.36131	1.8333
11_"Craigella"	28	10.5691	1.37521	1.1726
11_"Craigella"	28	11.4268	0.857645	0.926283
11_"Craigella"	28	13.2542	1.82746	1.35167
11_"Craigella"	1	0.659124	0.091982	0.303315
11_"Craigella"	1	1.78815	1.12902	1.06254
11_"Craigella"	1	2.43547	0.647326	0.804363
11_"Craigella"	1	3.83428	1.3988	1.18279
11_"Craigella"	1	4.1124	0.278124	0.527257
11_"Craigella"	1	4.85299	0.740584	0.860814
11_"Craigella"	1	5.22655	0.373561	0.611555
11_"Craigella"	1	5.86245	0.635902	0.797496
11_"Craigella"	1	6.15237	0.289921	0.538516
11_"Craigella"	1	6.91835	0.765984	0.875214
11_"Craigella"	1	8.04047	1.12211	1.05925
11_"Craigella"	1	8.24149	0.201021	0.44833
11_"Craigella"	2	4.40895	1.31389	1.1463
11_"Craigella"	2	5.12992	0.720973	0.849117
11_"Craigella"	2	5.91297	0.783042	0.884873
11_"Craigella"	2	7.44674	1.53377	1.23855
11_"Craigella"	2	8.46199	1.01525	1.00747
11_"Craigella"	2	9.96856	1.50657	1.2276
11_"Craigella"	2	10.1017	0.133163	0.364692
11_"Craigella"	2	11.2465	1.1448	1.07005
11_"Craigella"	2	13.0089	1.76237	1.3274
11_"Craigella"	2	13.4661	0.4572	0.676018
11_"Craigella"	2	16.1342	2.66806	1.6334
11_"Craigella"	2	16.2463	0.112121	0.334664
11_"Craigella"	2	18.7111	2.46486	1.57003
11_"Craigella"	3	1.53197	0.198842	0.446094
11_"Craigella"	3	3.15502	1.62305	1.27397
11_"Craigella"	3	4.36114	1.20613	1.09818
11_"Craigella"	3	6.74544	2.3843	1.54402
11_"Craigella"	3	7.9929	1.24746	1.11669
11_"Craigella"	3	10.0771	2.08417	1.44361
11_"Craigella"	3	10.3819	0.3048	0.552268
11_"Craigella"	3	11.7433	1.36139	1.16662
11_"Craigella"	3	13.3463	1.60306	1.2661
11_"Craigella"	3	13.3971	0.0508	0.225832
11_"Craigella"	3	16.0593	2.6622	1.63156
11_"Craigella"	3	18.3667	2.30735	1.51888
11_"Craigella"	3	19.5264	1.15968	1.07703
11_"Craigella"	3	20.6011	1.07477	1.03682
11_"Craigella"	3	21.5043	0.903131	0.950263
11_"Craigella"	3	22.9644	1.46013	1.2083
11_"Craigella"	3	24.0997	1.13534	1.06536
11_"Craigella"	4	1.75652	0.1016	0.319374
11_"Craigella"	4	4.03847	2.28195	1.51063
11_"Craigella"	4	4.57803	0.539563	0.734847
11_"Craigella"	4	5.80956	1.23153	1.10995
11_"Craigella"	4	7.49393	1.68437	1.29769
11_"Craigella"	4	9.31146	1.81753	1.34833
11_"Craigella"	4	9.59267	0.281206	0.530094
11_"Craigella"	4	12.4157	2.82301	1.68018
11_"Craigella"	4	13.0438	0.628089	0.792465
11_"Craigella"	4	14.2183	1.17456	1.08397
11_"Craigella"	4	14.9165	0.698126	0.835464
11_"Craigella"	4	17.75	2.83353	1.68345
11_"Craigella"	4	20.2849	2.5349	1.59217
11_"Craigella"	6	2.44487	1.05989	1.02956
11_"Craigella"	6	3.20687	0.762	0.872926
11_"Craigella"	6	4.21777	1.01089	1.00548
11_"Craigella"	6	4.93949	0.721721	0.849706
11_"Craigella"	6	5.97759	1.0381	1.01882
11_"Craigella"	6	7.80309	1.8255	1.35093
11_"Craigella"	6	9.556	1.75291	1.32401
11_"Craigella"	6	10.4258	0.869763	0.932738
11_"Craigella"	6	11.7959	1.3701	1.17047
11_"Craigella"	6	13.4461	1.65025	1.28452
11_"Craigella"	6	15.0815	1.63537	1.27867
11_"Craigella"	6	15.1682	0.086721	0.294958
11_"Craigella"	6	17.0768	1.90861	1.38167
11_"Craigella"	8	2.5367	0.854884	0.924662
11_"Craigella"	8	5.13217	2.59547	1.6109
11_"Craigella"	8	5.6543	0.522131	0.722496
11_"Craigella"	8	7.03492	1.38063	1.17516
11_"Craigella"	8	8.05453	1.01961	1.00995
11_"Craigella"	8	9.27554	1.221	1.10499
11_"Craigella"	8	11.6878	2.41225	1.55306
11_"Craigella"	8	13.9872	2.29938	1.51625
11_"Craigella"	9	4.34763	0.67889	0.824015
11_"Craigella"	9	5.46448	1.11685	1.05688
11_"Craigella"	9	6.4656	1.00112	1.0005
11_"Craigella"	9	8.88147	2.41586	1.55435
11_"Craigella"	9	11.5354	2.65393	1.62911
11_"Craigella"	9	13.0884	1.55301	1.24619
11_"Craigella"	9	18.1854	1.38573	1.17729
11_"Craigella"	11	3.04576	1.66438	1.28996
11_"Craigella"	11	5.16479	2.11903	1.45568
11_"Craigella"	11	6.88072	1.71593	1.30996
11_"Craigella"	11	7.61657	0.735852	0.857904
11_"Craigella"	11	8.03349	0.416921	0.645755
11_"Craigella"	11	12.7872	0.895163	0.946044
11_"Craigella"	11	14.7002	1.91297	1.38311
11_"Craigella"	11	17.9945	3.29434	1.81494
11_"Craigella"	13	4.84361	1.98076	1.40748
11_"Craigella"	13	7.30878	2.46517	1.57003
11_"Craigella"	13	9.24129	1.93251	1.39032
11_"Craigella"	13	15.2841	1.24821	1.11714
11_"Craigella"	13	16.0461	0.762	0.872926
11_"Craigella"	13	17.2323	1.18614	1.08904
11_"Craigella"	13	20.5846	3.35236	1.83085
11_"Craigella"	13	22.4007	1.81604	1.34759
11_"Craigella"	14	1.96993	0.097242	0.311448
11_"Craigella"	14	3.01749	1.04756	1.02372
11_"Craigella"	14	4.13254	1.11505	1.05594
11_"Craigella"	14	6.18919	2.05665	1.43422
11_"Craigella"	14	7.65113	1.46193	1.20913
11_"Craigella"	14	8.82569	1.17456	1.08397
11_"Craigella"	14	9.08149	0.255805	0.505964
11_"Craigella"	14	13.5232	0.852332	0.923038
11_"Craigella"	14	14.4902	0.967005	0.983362
11_"Craigella"	14	16.2359	1.74569	1.32136
11_"Craigella"	15	1.78341	0.391521	0.626099
11_"Craigella"	15	2.79867	1.01525	1.00747
11_"Craigella"	15	3.778	0.979331	0.989444
11_"Craigella"	15	4.32192	0.543921	0.737564
11_"Craigella"	15	5.85133	1.52941	1.23653
11_"Craigella"	15	7.39488	1.54355	1.24258
11_"Craigella"	15	8.94609	1.55121	1.24539
11_"Craigella"	15	10.0078	1.06169	1.03053
11_"Craigella"	15	12.3526	2.34477	1.53134
11_"Craigella"	15	13.4081	1.05553	1.02762
11_"Craigella"	15	15.3867	1.97865	1.40677
11_"Craigella"	15	16.1313	0.744568	0.863134
11_"Craigella"	16	5.32547	3.14511	1.77341
11_"Craigella"	16	6.09799	0.772521	0.879204
11_"Craigella"	16	7.37957	1.28158	1.13225
11_"Craigella"	16	8.72863	1.34906	1.16146
11_"Craigella"	16	9.06935	0.340721	0.583952
11_"Craigella"	16	10.5752	1.50582	1.22719
11_"Craigella"	16	12.2414	1.66619	1.29074
11_"Craigella"	16	14.6681	2.42669	1.55788
11_"Craigella"	16	17.0527	2.38461	1.54434
11_"Craigella"	16	19.6931	2.64041	1.62481
11_"Craigella"	17	2.68294	1.29285	1.1371
11_"Craigella"	17	3.21995	0.537011	0.732803
11_"Craigella"	17	5.31072	2.09077	1.44603
11_"Craigella"	17	5.71892	0.408205	0.638749
11_"Craigella"	17	8.12787	2.40895	1.5521
11_"Craigella"	17	9.30349	1.17562	1.08444
11_"Craigella"	17	10.5114	1.20793	1.09909
11_"Craigella"	17	12.7085	2.19704	1.48223
11_"Craigella"	17	13.7665	1.05808	1.02859
11_"Craigella"	17	14.5234	0.756895	0.870057
11_"Craigella"	17	16.37	1.84654	1.35904
11_"Craigella"	17	19.4078	3.03779	1.74299
11_"Craigella"	18	4.81311	1.98257	1.40819
11_"Craigella"	18	4.91471	0.1016	0.319374
11_"Craigella"	18	6.36898	1.45427	1.20582
11_"Craigella"	18	7.48764	1.11866	1.05783
11_"Craigella"	18	7.81784	0.3302	0.574456
11_"Craigella"	18	9.77034	1.9525	1.39714
11_"Craigella"	18	10.041	0.270684	0.520577
11_"Craigella"	18	11.5563	1.51528	1.23085
11_"Craigella"	18	11.9199	0.363569	0.603324
11_"Craigella"	18	14.3811	2.46125	1.56876
11_"Craigella"	18	14.5397	0.158563	0.398748
11_"Craigella"	18	17.6711	3.13142	1.76946
11_"Craigella"	19	4.93768	1.18073	1.08674
11_"Craigella"	19	7.32634	2.38866	1.54564
11_"Craigella"	19	8.48963	1.16329	1.07842
11_"Craigella"	19	10.8547	2.36506	1.53786
11_"Craigella"	19	12.0398	1.18508	1.08858
11_"Craigella"	19	13.153	1.11324	1.05499
11_"Craigella"	19	16.2696	3.11654	1.7655
11_"Craigella"	19	20.5178	0.391521	0.626099
11_"Craigella"	19	21.3825	0.864657	0.930054
11_"Craigella"	19	23.3165	1.93401	1.39068
11_"Craigella"	19	24.8285	1.51198	1.22963
11_"Craigella"	19	26.1108	1.28233	1.13225
11_"Craigella"	20	3.14045	1.15097	1.07285
11_"Craigella"	20	4.98624	1.84579	1.35868
11_"Craigella"	20	6.62778	1.64154	1.28141
11_"Craigella"	20	7.49679	0.869016	0.932202
11_"Craigella"	20	9.46853	1.97174	1.40428
11_"Craigella"	20	9.59117	0.122642	0.350714
11_"Craigella"	20	13.0379	3.44674	1.85661
11_"Craigella"	20	15.1174	2.0795	1.44187
11_"Craigella"	20	17.1066	1.98917	1.41032
11_"Craigella"	20	17.6795	0.572932	0.756968
11_"Craigella"	21	2.42383	0.967005	0.983362
11_"Craigella"	21	3.76673	1.3429	1.15888
11_"Craigella"	21	4.98699	1.22026	1.10454
11_"Craigella"	21	7.778	2.79101	1.67063
11_"Craigella"	21	8.0574	0.2794	0.528205
11_"Craigella"	21	9.87854	1.82114	1.34944
11_"Craigella"	21	13.1536	3.2751	1.8097
11_"Craigella"	21	15.7814	2.62778	1.62111
11_"Craigella"	21	16.5557	0.774326	0.879773
11_"Craigella"	21	18.3207	1.76493	1.32853
11_"Craigella"	22	2.97391	1.18795	1.08995
11_"Craigella"	22	3.41624	0.442321	0.664831
11_"Craigella"	22	5.10347	1.68723	1.29885
11_"Craigella"	22	6.08099	0.977526	0.988939
11_"Craigella"	22	8.02658	1.94559	1.39499
11_"Craigella"	22	10.7647	2.73809	1.65469
11_"Craigella"	22	11.1685	0.403847	0.63561
11_"Craigella"	22	14.0503	2.88178	1.69765
11_"Craigella"	22	15.8758	1.8255	1.3513
11_"Craigella"	22	17.9887	2.11287	1.45362
11_"Craigella"	24	6.70292	3.04215	1.74413
11_"Craigella"	24	7.06904	0.366121	0.604979
11_"Craigella"	24	10.5469	3.47787	1.86494
11_"Craigella"	24	11.4878	0.940857	0.970052
11_"Craigella"	24	13.7908	2.30299	1.51756
11_"Craigella"	24	16.9171	3.12631	1.76805
11_"Craigella"	24	19.5826	2.6655	1.63279
11_"Craigella"	24	19.8725	0.289921	0.538516
11_"Craigella"	24	23.0881	3.21559	1.79332
11_"Craigella"	24	24.226	1.13789	1.06677
11_"Craigella"	24	27.2068	2.98083	1.72656
11_"Craigella"	25	1.91222	0.444126	0.666333
11_"Craigella"	25	4.47071	2.55849	1.59937
11_"Craigella"	25	5.47799	1.00728	1.00349
11_"Craigella"	25	5.96676	0.488763	0.699285
11_"Craigella"	25	6.53353	0.566768	0.752994
11_"Craigella"	25	8.79263	2.25911	1.503
11_"Craigella"	25	10.1722	1.37957	1.17473
11_"Craigella"	25	10.8529	0.680694	0.825227
11_"Craigella"	25	11.9679	1.11505	1.05594
11_"Craigella"	25	13.2985	1.33057	1.15369
11_"Craigella"	25	15.4665	2.16803	1.47241
11_"Craigella"	25	17.484	2.01743	1.42021
11_"Craigella"	25	20.9216	3.43759	1.85418
11_"Craigella"	25	23.214	2.29247	1.51394
11_"Craigella"	25	24.2003	0.986242	0.992975
11_"Craigella"	25	25.6851	1.48478	1.21861
11_"Craigella"	28	2.2319	0.266326	0.515752
11_"Craigella"	28	2.49642	0.264521	0.514782
11_"Craigella"	28	3.38031	0.883895	0.940213
11_"Craigella"	28	4.2606	0.880284	0.938083
11_"Craigella"	28	7.19137	2.93077	1.71202
11_"Craigella"	28	8.79082	1.59945	1.26452
11_"Craigella"	28	8.95375	0.162921	0.403733
11_"Craigella"	28	11.9222	2.9685	1.72279
11_"Craigella"	28	13.3693	1.44705	1.20291
11_"Craigella"	28	17.8447	0.916205	0.957079
12_"Moneymaker"	1	6.92704	1.361	1.16662
12_"Moneymaker"	1	7.75435	0.827311	0.909395
12_"Moneymaker"	1	11.0629	3.30857	1.81907
12_"Moneymaker"	1	12.0799	1.01696	1.00846
12_"Moneymaker"	1	14.4919	2.41198	1.55306
12_"Moneymaker"	1	18.251	3.75918	1.93881
12_"Moneymaker"	1	19.3802	1.12913	1.06254
12_"Moneymaker"	1	22.0023	2.62212	1.61926
12_"Moneymaker"	1	22.2117	0.209459	0.457165
12_"Moneymaker"	2	9.35362	3.85975	1.96469
12_"Moneymaker"	2	10.556	1.20237	1.09636
12_"Moneymaker"	2	12.9442	2.38821	1.54532
12_"Moneymaker"	2	17.9429	4.99873	2.23584
12_"Moneymaker"	2	18.1969	0.254	0.503984
12_"Moneymaker"	2	19.1047	0.907789	0.95289
12_"Moneymaker"	2	22.0755	2.9708	1.72366
12_"Moneymaker"	2	22.1966	0.121057	0.347851
12_"Moneymaker"	2	24.6204	2.42387	1.55692
12_"Moneymaker"	2	28.2761	3.65561	1.91207
12_"Moneymaker"	2	28.3875	0.111493	0.333167
12_"Moneymaker"	2	30.4769	2.08939	1.44534
12_"Moneymaker"	3	9.49217	3.91945	1.97965
12_"Moneymaker"	3	10.6253	1.1331	1.06442
12_"Moneymaker"	3	12.9904	2.36512	1.53786
12_"Moneymaker"	3	17.966	4.97563	2.23069
12_"Moneymaker"	3	18.4008	0.434766	0.659545
12_"Moneymaker"	3	19.0721	0.671277	0.819146
12_"Moneymaker"	3	22.1831	3.11099	1.7638
12_"Moneymaker"	3	22.2619	0.078837	0.281069
12_"Moneymaker"	3	24.6953	2.43343	1.55981
12_"Moneymaker"	3	28.3701	3.67474	1.91703
12_"Moneymaker"	3	28.4815	0.111492	0.333167
12_"Moneymaker"	3	30.5709	2.08939	1.44534
12_"Moneymaker"	4	8.38477	2.5396	1.59374
12_"Moneymaker"	4	12.9254	4.54059	2.13096
12_"Moneymaker"	4	14.8125	1.88717	1.37368
12_"Moneymaker"	4	15.9648	1.15222	1.07331
12_"Moneymaker"	4	20.2725	4.30776	2.07557
12_"Moneymaker"	4	26.7191	6.44661	2.53909
12_"Moneymaker"	4	29.1987	2.47961	1.5748
12_"Moneymaker"	4	31.4474	2.2487	1.49967
12_"Moneymaker"	4	33.1284	1.681	1.29653
12_"Moneymaker"	4	36.5231	3.39464	1.84255
12_"Moneymaker"	4	36.5693	0.046182	0.214476
12_"Moneymaker"	4	37.3543	0.785091	0.886002
12_"Moneymaker"	4	42.3221	4.96771	2.2289
12_"Moneymaker"	4	44.1482	1.8261	1.3513
12_"Moneymaker"	4	47.3346	3.18643	1.78494
12_"Moneymaker"	4	47.6499	0.315349	0.561249
12_"Moneymaker"	4	49.3893	1.73934	1.31871
12_"Moneymaker"	4	51.9553	2.56597	1.60187
12_"Moneymaker"	5	23.7415	2.41787	1.55499
12_"Moneymaker"	5	25.8998	2.15826	1.46901
12_"Moneymaker"	5	27.0282	1.12845	1.06207
12_"Moneymaker"	5	28.3757	1.34748	1.1606
12_"Moneymaker"	5	30.0075	1.63181	1.2775
12_"Moneymaker"	5	30.2018	0.194292	0.440454
12_"Moneymaker"	6	8.1585	2.00523	1.41598
12_"Moneymaker"	6	19.1387	0.413316	0.642651
12_"Moneymaker"	6	20.8316	1.69288	1.30115
12_"Moneymaker"	6	22.3859	1.55434	1.2466
12_"Moneymaker"	6	24.6155	2.22957	1.49332
12_"Moneymaker"	6	25.8928	1.27724	1.13004
12_"Moneymaker"	6	28.7388	2.84607	1.68701
12_"Moneymaker"	6	28.9331	0.194292	0.440454
12_"Moneymaker"	6	30.2001	1.267	1.12561
12_"Moneymaker"	6	30.3944	0.194292	0.440454
12_"Moneymaker"	6	33.1428	2.74838	1.65771
12_"Moneymaker"	6	35.2674	2.12465	1.45774
12_"Moneymaker"	7	10.4593	4.19847	2.0489
12_"Moneymaker"	7	21.9423	4.0606	2.01519
12_"Moneymaker"	7	22.6614	0.7191	0.847939
12_"Moneymaker"	7	23.1097	0.448292	0.669328
12_"Moneymaker"	7	27.5537	4.44398	2.10808
12_"Moneymaker"	7	27.9901	0.436407	0.660303
12_"Moneymaker"	7	31.2317	3.24161	1.80056
12_"Moneymaker"	7	31.5646	0.332837	0.577062
12_"Moneymaker"	7	33.1492	1.58467	1.25897
12_"Moneymaker"	8	2.07518	0.078837	0.281069
12_"Moneymaker"	8	5.60113	3.52595	1.87776
12_"Moneymaker"	8	8.01379	2.41266	1.55338
12_"Moneymaker"	8	9.59846	1.58467	1.25897
12_"Moneymaker"	8	10.6537	1.05522	1.02713
12_"Moneymaker"	8	14.5405	3.8868	1.97155
12_"Moneymaker"	9	4.43238	3.8096	1.95192
12_"Moneymaker"	9	5.95666	1.52428	1.2345
12_"Moneymaker"	9	7.07787	1.12121	1.05877
12_"Moneymaker"	9	11.678	4.60018	2.14476
12_"Moneymaker"	9	12.5054	0.827311	0.909395
12_"Moneymaker"	9	14.5512	2.04581	1.43038
12_"Moneymaker"	9	15.6747	1.12353	1.06019
12_"Moneymaker"	9	19.5093	3.83462	1.95832
12_"Moneymaker"	9	19.5786	0.069273	0.262679
12_"Moneymaker"	9	20.4435	0.86489	0.930054
13_"M82"	1	2.02108	0.418918	0.647302
13_"M82"	1	4.5574	2.53632	1.59248
13_"M82"	1	6.07675	1.51936	1.23248
13_"M82"	1	6.95353	0.876775	0.936483
13_"M82"	1	7.73466	0.781129	0.883742
13_"M82"	1	10.3871	2.65245	1.6285
13_"M82"	1	12.6533	2.26619	1.50532
13_"M82"	1	13.8326	1.17928	1.08582
13_"M82"	1	16.399	2.56637	1.60187
13_"M82"	1	16.8641	0.4651	0.681909
13_"M82"	1	21.5798	4.71575	2.17164
13_"M82"	1	23.9535	2.37372	1.54078
13_"M82"	1	24.9322	0.978703	0.989444
13_"M82"	1	28.377	3.44479	1.85607
13_"M82"	1	32.6864	4.3094	2.07581
13_"M82"	1	32.8441	0.157674	0.397492
13_"M82"	1	36.3836	3.53947	1.88122
13_"M82"	1	38.3535	1.96997	1.40357
13_"M82"	2	3.62323	0.078838	0.281069
13_"M82"	2	5.58528	1.96205	1.40071
13_"M82"	2	7.60307	2.01779	1.42056
13_"M82"	2	10.0543	2.4512	1.56557
13_"M82"	2	11.0663	1.01204	1.00598
13_"M82"	2	14.93	3.86371	1.96571
13_"M82"	2	20.0666	5.13659	2.2665
13_"M82"	2	25.3661	5.29947	2.30196
13_"M82"	2	28.9714	3.60535	1.89868
13_"M82"	2	30.4462	1.47482	1.2145
13_"M82"	2	34.4831	4.03683	2.00923
13_"M82"	3	4.12031	2.47333	1.57258
13_"M82"	3	5.50344	1.38313	1.17601
13_"M82"	3	8.82949	3.32605	1.82373
13_"M82"	3	9.73168	0.902187	0.949737
13_"M82"	3	11.4612	1.7295	1.31491
13_"M82"	3	15.4476	3.98641	1.9965
13_"M82"	3	17.9601	2.51255	1.58524
13_"M82"	3	21.6447	3.68458	1.91964
13_"M82"	3	23.9277	2.283	1.51096
13_"M82"	3	25.9765	2.04881	1.43143
13_"M82"	3	30.4014	4.42485	2.10357
13_"M82"	3	34.4202	4.01878	2.00474
13_"M82"	3	35.1432	0.723062	0.850294
13_"M82"	3	36.086	0.942766	0.971082
13_"M82"	3	40.1361	4.05007	2.01246
13_"M82"	3	41.8115	1.67539	1.29422
13_"M82"	4	2.97437	1.83075	1.35314
13_"M82"	4	7.01652	4.04215	2.01047
13_"M82"	4	9.08842	2.0719	1.43944
13_"M82"	4	26.2336	4.18042	2.0445
13_"M82"	4	32.3301	6.09645	2.46901
13_"M82"	4	32.6725	0.342402	0.584808
13_"M82"	4	36.0294	3.35695	1.83221
13_"M82"	4	40.0439	4.01442	2.0035
13_"M82"	4	41.8387	1.79481	1.33978
13_"M82"	4	44.8137	2.97505	1.72482
13_"M82"	4	46.2638	1.45009	1.20416
13_"M82"	5	4.55372	0.078838	0.281069
13_"M82"	5	7.26124	2.70752	1.6456
13_"M82"	5	9.85234	2.5911	1.60966
13_"M82"	5	9.90809	0.055747	0.236643
13_"M82"	5	11.855	1.94688	1.39535
13_"M82"	5	14.6644	2.80945	1.67601
13_"M82"	5	20.7587	6.09424	2.4686
13_"M82"	5	20.9068	0.14811	0.384708
13_"M82"	5	22.3578	1.45105	1.20457
13_"M82"	5	24.8081	2.45024	1.56525
13_"M82"	5	31.3406	6.53257	2.55597
13_"M82"	5	37.0621	5.72151	2.39207
13_"M82"	5	40.0728	3.0107	1.73522
13_"M82"	5	40.6072	0.534373	0.730753
13_"M82"	6	6.33896	2.58346	1.60717
13_"M82"	6	9.35815	3.01919	1.73753
13_"M82"	6	11.937	2.57882	1.60593
13_"M82"	6	13.1984	1.2614	1.12294
13_"M82"	6	28.6935	5.35233	2.31344
13_"M82"	6	31.4657	2.77215	1.66493
13_"M82"	6	34.1989	2.73321	1.65318
13_"M82"	6	36.4433	2.24434	1.498
13_"M82"	6	42.1548	5.71154	2.38998
13_"M82"	6	44.9078	2.75302	1.65922
13_"M82"	6	44.9636	0.055747	0.236643
13_"M82"	6	48.942	3.97848	1.99449
13_"M82"	6	50.9321	1.99006	1.41067
13_"M82"	6	52.8671	1.935	1.39104
13_"M82"	6	53.9095	1.04237	1.02078
13_"M82"	7	2.68279	0.588479	0.766812
13_"M82"	7	3.38276	0.699971	0.83666
13_"M82"	7	7.41303	4.03027	2.00749
13_"M82"	7	30.4037	2.86259	1.69204
13_"M82"	7	31.1172	0.713497	0.844393
13_"M82"	7	35.2867	4.16949	2.04181
13_"M82"	7	37.1725	1.88581	1.37332
13_"M82"	7	51.7875	2.13585	1.46151
13_"M82"	7	54.4435	2.65602	1.62972
13_"M82"	7	56.1541	1.71065	1.30805
13_"M82"	7	57.1002	0.946047	0.972625
13_"M82"	9	3.01495	0.957253	0.978264
13_"M82"	9	6.96734	3.95239	1.98796
13_"M82"	9	8.39993	1.4326	1.19708
13_"M82"	9	12.3173	3.91741	1.97914
13_"M82"	10	3.58526	2.46869	1.57131
13_"M82"	10	4.11239	0.527129	0.725948
13_"M82"	10	5.13959	1.02721	1.01341
13_"M82"	10	8.35636	3.21676	1.7936
13_"M82"	10	10.1801	1.82378	1.35056
13_"M82"	10	11.4719	1.29173	1.13666
13_"M82"	11	2.13025	1.11725	1.05688
13_"M82"	11	3.89897	1.76872	1.33004
13_"M82"	11	5.90255	2.00359	1.41563
13_"M82"	11	7.02308	1.12053	1.05877
13_"M82"	11	11.9156	4.89255	2.21201
13_"M82"	11	12.4038	0.488191	0.69857
13_"M82"	11	19.0655	6.66167	2.58109
13_"M82"	11	19.8252	0.759679	0.87178
14_"Micro-Tom"	1	3.47426	1.78703	1.33679
14_"Micro-Tom"	1	5.06424	1.58999	1.26095
14_"Micro-Tom"	1	6.30374	1.23949	1.1131
14_"Micro-Tom"	1	7.51783	1.21409	1.10182
14_"Micro-Tom"	1	8.92461	1.40677	1.18617
14_"Micro-Tom"	1	10.4014	1.47681	1.21532
14_"Micro-Tom"	1	12.6849	2.28345	1.51096
14_"Micro-Tom"	1	14.4962	1.81137	1.34573
14_"Micro-Tom"	1	16.051	1.55482	1.247
14_"Micro-Tom"	1	16.9437	0.89261	0.944987
14_"Micro-Tom"	1	17.5235	0.579842	0.761577
14_"Micro-Tom"	1	18.0333	0.509805	0.714143
14_"Micro-Tom"	1	19.2333	1.19996	1.09545
14_"Micro-Tom"	1	20.3019	1.06861	1.03392
14_"Micro-Tom"	1	21.0192	0.717363	0.846759
14_"Micro-Tom"	1	22.1789	1.15968	1.07703
14_"Micro-Tom"	1	24.6779	2.49897	1.58082
14_"Micro-Tom"	1	25.4461	0.768163	0.876356
14_"Micro-Tom"	1	25.9243	0.478242	0.691375
14_"Micro-Tom"	1	26.9421	1.0178	1.00896
14_"Micro-Tom"	1	27.7208	0.778684	0.88261
14_"Micro-Tom"	1	28.3725	0.651685	0.807465
14_"Micro-Tom"	1	29.915	1.54249	1.24177
14_"Micro-Tom"	1	30.9792	1.06425	1.0315
14_"Micro-Tom"	1	31.6142	0.635	0.796869
14_"Micro-Tom"	1	32.4709	0.856689	0.925743
14_"Micro-Tom"	1	34.4303	1.95941	1.39964
14_"Micro-Tom"	1	35.0609	0.630642	0.794355
14_"Micro-Tom"	1	35.9859	0.924921	0.961769
14_"Micro-Tom"	1	36.3687	0.382806	0.61887
14_"Micro-Tom"	1	37.4819	1.11324	1.05499
14_"Micro-Tom"	1	37.9199	0.437963	0.661816
14_"Micro-Tom"	1	38.2755	0.3556	0.596657
14_"Micro-Tom"	1	39.2381	0.962647	0.981326
14_"Micro-Tom"	1	41.8939	2.65573	1.62972
14_"Micro-Tom"	1	42.4439	0.550084	0.74162
14_"Micro-Tom"	1	43.3391	0.895163	0.946044
14_"Micro-Tom"	2	1.18253	0.162921	0.403733
14_"Micro-Tom"	2	2.19598	1.01345	1.00648
14_"Micro-Tom"	2	9.24292	1.99894	1.41386
14_"Micro-Tom"	2	10.7049	1.46193	1.20913
14_"Micro-Tom"	2	11.94	1.23514	1.11131
14_"Micro-Tom"	2	13.7586	1.81859	1.3487
14_"Micro-Tom"	2	14.7967	1.0381	1.01882
14_"Micro-Tom"	2	16.3235	1.52686	1.23572
14_"Micro-Tom"	2	18.0238	1.7003	1.30384
14_"Micro-Tom"	2	19.3098	1.28594	1.13402
14_"Micro-Tom"	2	20.6001	1.29029	1.13578
14_"Micro-Tom"	2	21.6451	1.04501	1.02225
14_"Micro-Tom"	2	22.4702	0.825126	0.908295
14_"Micro-Tom"	2	23.4775	1.00728	1.00349
14_"Micro-Tom"	2	24.0863	0.608852	0.780385
14_"Micro-Tom"	2	25.0831	0.996763	0.998499
14_"Micro-Tom"	2	26.6702	1.58713	1.25976
14_"Micro-Tom"	2	28.5832	1.91297	1.38311
14_"Micro-Tom"	2	30.949	2.36581	1.53818
14_"Micro-Tom"	2	31.4632	0.514163	0.716938
14_"Micro-Tom"	2	33.116	1.6528	1.28569
14_"Micro-Tom"	3	2.62523	0.937248	0.967988
14_"Micro-Tom"	3	6.75521	0.255805	0.505964
14_"Micro-Tom"	3	7.69066	0.935442	0.966954
14_"Micro-Tom"	3	7.8387	0.148042	0.384708
14_"Micro-Tom"	3	11.2136	0.535205	0.731437
14_"Micro-Tom"	3	12.4941	1.28052	1.13181
14_"Micro-Tom"	3	12.5554	0.061321	0.246982
14_"Micro-Tom"	3	14.1339	1.57841	1.25618
14_"Micro-Tom"	3	14.5403	0.4064	0.637181
14_"Micro-Tom"	3	15.9917	1.45141	1.20457
14_"Micro-Tom"	3	17.1873	1.19561	1.09362
14_"Micro-Tom"	3	18.7341	1.54685	1.24378
14_"Micro-Tom"	3	20.5498	1.81573	1.34759
14_"Micro-Tom"	3	22.9218	2.37197	1.54013
14_"Micro-Tom"	3	24.5652	1.64334	1.2818
14_"Micro-Tom"	3	25.6802	1.11505	1.05594
14_"Micro-Tom"	3	26.0209	0.340721	0.583952
14_"Micro-Tom"	3	27.1929	1.17201	1.08259
14_"Micro-Tom"	3	27.9331	0.74021	0.860233
14_"Micro-Tom"	3	28.3395	0.4064	0.637181
14_"Micro-Tom"	3	29.5878	1.24821	1.11714
14_"Micro-Tom"	3	31.435	1.84729	1.35904
14_"Micro-Tom"	3	35.3814	0.522131	0.722496
14_"Micro-Tom"	3	39.4449	1.13789	1.06677
14_"Micro-Tom"	3	39.5973	0.1524	0.389872
14_"Micro-Tom"	4	2.28992	1.49275	1.22188
14_"Micro-Tom"	4	4.12849	1.83857	1.3561
14_"Micro-Tom"	4	4.44998	0.321484	0.566569
14_"Micro-Tom"	4	6.58103	2.13105	1.45979
14_"Micro-Tom"	4	8.40291	1.82189	1.34981
14_"Micro-Tom"	4	9.24472	0.84181	0.917606
14_"Micro-Tom"	4	10.0426	0.797921	0.893308
14_"Micro-Tom"	4	12.1483	2.10565	1.45121
14_"Micro-Tom"	4	12.3112	0.162921	0.403733
14_"Micro-Tom"	4	13.2441	0.932889	0.965919
14_"Micro-Tom"	4	14.0271	0.783042	0.884873
14_"Micro-Tom"	4	14.5518	0.524685	0.724569
14_"Micro-Tom"	4	15.9673	1.41549	1.18954
14_"Micro-Tom"	4	16.3668	0.399489	0.631664
14_"Micro-Tom"	4	17.4249	1.05808	1.02859
14_"Micro-Tom"	4	18.2369	0.812052	0.90111
14_"Micro-Tom"	4	19.7225	1.48553	1.21902
14_"Micro-Tom"	4	20.1902	0.467721	0.684105
14_"Micro-Tom"	4	24.1398	0.086721	0.294958
14_"Micro-Tom"	4	25.4116	1.27181	1.12783
14_"Micro-Tom"	4	25.9933	0.581647	0.762889
14_"Micro-Tom"	4	27.1609	1.16765	1.08074
14_"Micro-Tom"	4	29.1501	1.98917	1.41032
14_"Micro-Tom"	4	30.0961	0.945963	0.972625
14_"Micro-Tom"	4	31.3381	1.24205	1.11445
14_"Micro-Tom"	4	33.1215	1.78342	1.33529
14_"Micro-Tom"	4	39.2446	0.843616	0.918695
14_"Micro-Tom"	4	39.983	0.738405	0.859069
14_"Micro-Tom"	4	41.8691	1.88607	1.37332
14_"Micro-Tom"	4	46.0353	1.08093	1.03971
14_"Micro-Tom"	4	46.2762	0.240926	0.490918
14_"Micro-Tom"	4	46.4453	0.169084	0.411096
14_"Micro-Tom"	5	3.51634	1.5733	1.25419
14_"Micro-Tom"	5	8.6114	0.439768	0.663325
14_"Micro-Tom"	5	10.7533	2.14188	1.46356
14_"Micro-Tom"	5	11.2867	0.5334	0.730068
14_"Micro-Tom"	5	12.7881	1.50146	1.22515
14_"Micro-Tom"	5	14.8538	2.06568	1.43736
14_"Micro-Tom"	5	14.8538	0	0
14_"Micro-Tom"	5	16.209	1.35523	1.16404
14_"Micro-Tom"	5	16.8186	0.6096	0.781025
14_"Micro-Tom"	5	17.4634	0.644773	0.803119
14_"Micro-Tom"	5	18.0984	0.635	0.796869
14_"Micro-Tom"	5	19.5665	1.46809	1.21161
14_"Micro-Tom"	5	20.9882	1.42165	1.19248
14_"Micro-Tom"	5	21.9439	0.955736	0.977753
14_"Micro-Tom"	5	22.7821	0.8382	0.915423
14_"Micro-Tom"	5	24.6628	1.88066	1.3715
14_"Micro-Tom"	5	24.8362	0.173442	0.415933
14_"Micro-Tom"	5	27.3326	2.49642	1.57987
14_"Micro-Tom"	5	27.4658	0.133163	0.364692
14_"Micro-Tom"	5	30.775	0.158563	0.398748
14_"Micro-Tom"	5	31.8988	1.12376	1.06019
14_"Micro-Tom"	5	32.3219	0.423084	0.650385
14_"Micro-Tom"	5	33.9046	1.58277	1.25817
14_"Micro-Tom"	5	35.5679	1.66333	1.28957
14_"Micro-Tom"	5	37.064	1.49605	1.22311
14_"Micro-Tom"	5	39.3028	2.23881	1.49633
14_"Micro-Tom"	5	40.8874	1.58457	1.25897
14_"Micro-Tom"	5	42.4063	1.51889	1.23248
14_"Micro-Tom"	5	43.8577	1.45141	1.20457
14_"Micro-Tom"	5	44.0416	0.183963	0.428952
14_"Micro-Tom"	5	45.1041	1.06244	1.03053
14_"Micro-Tom"	5	46.2543	1.15022	1.07238
14_"Micro-Tom"	8	3.54865	1.63102	1.27711
14_"Micro-Tom"	8	4.76966	1.22101	1.10499
14_"Micro-Tom"	8	7.32771	2.55805	1.59937
14_"Micro-Tom"	8	7.71923	0.391521	0.626099
14_"Micro-Tom"	8	8.52257	0.803336	0.896103
14_"Micro-Tom"	8	10.2998	1.77725	1.33304
14_"Micro-Tom"	8	11.4228	1.12302	1.05972
14_"Micro-Tom"	8	12.58	1.15713	1.07564
14_"Micro-Tom"	8	13.5259	0.945963	0.972625
14_"Micro-Tom"	8	13.7712	0.245284	0.494975
14_"Micro-Tom"	8	14.8039	1.03268	1.01637
14_"Micro-Tom"	8	15.2542	0.450289	0.67082
14_"Micro-Tom"	8	16.4095	1.15533	1.07471
14_"Micro-Tom"	8	17.5797	1.17021	1.08167
14_"Micro-Tom"	8	18.3882	0.808442	0.898888
14_"Micro-Tom"	8	19.4673	1.07913	1.03875
14_"Micro-Tom"	8	21.1665	1.69925	1.30346
14_"Micro-Tom"	8	22.5015	1.33493	1.15542
14_"Micro-Tom"	8	27.5197	0.797173	0.892749
14_"Micro-Tom"	8	28.3492	0.829484	0.910494
14_"Micro-Tom"	8	30.1642	1.81498	1.34722
14_"Micro-Tom"	9	2.36973	0.254	0.503984
14_"Micro-Tom"	9	4.76486	2.39513	1.54758
14_"Micro-Tom"	9	6.2032	1.43834	1.19917
14_"Micro-Tom"	9	8.77943	2.57623	1.60499
14_"Micro-Tom"	9	13.9653	1.78267	1.33529
14_"Micro-Tom"	9	14.892	0.926726	0.962808
14_"Micro-Tom"	9	15.3151	0.423084	0.650385
14_"Micro-Tom"	9	17.1362	1.82114	1.34944
14_"Micro-Tom"	9	17.498	0.361763	0.601664
14_"Micro-Tom"	9	18.9574	1.45938	1.20789
14_"Micro-Tom"	9	19.4251	0.467721	0.684105
14_"Micro-Tom"	9	21.0666	1.64154	1.28141
14_"Micro-Tom"	9	21.8899	0.823321	0.907193
14_"Micro-Tom"	9	23.1189	1.22897	1.1086
14_"Micro-Tom"	9	23.5761	0.4572	0.676018
14_"Micro-Tom"	9	25.1966	1.6205	1.27279
14_"Micro-Tom"	9	25.6538	0.4572	0.676018
14_"Micro-Tom"	9	27.304	1.65025	1.28452
14_"Micro-Tom"	9	27.6001	0.296084	0.544059
14_"Micro-Tom"	9	28.5566	0.956484	0.977753
14_"Micro-Tom"	9	28.8527	0.296084	0.544059
14_"Micro-Tom"	9	29.9826	1.12993	1.06301
14_"Micro-Tom"	9	30.4503	0.467721	0.684105
14_"Micro-Tom"	9	31.9631	1.51273	1.23004
14_"Micro-Tom"	9	32.7015	0.738405	0.859069
14_"Micro-Tom"	9	34.3184	1.61688	1.27161
14_"Micro-Tom"	10	2.02945	0.0508	0.225832
14_"Micro-Tom"	10	12.9171	1.64515	1.28258
14_"Micro-Tom"	10	15.0448	2.12775	1.45877
14_"Micro-Tom"	10	17.4687	2.42383	1.55692
14_"Micro-Tom"	10	19.0402	1.5715	1.25379
14_"Micro-Tom"	10	19.5228	0.4826	0.694982
14_"Micro-Tom"	10	20.3007	0.777936	0.882043
14_"Micro-Tom"	10	21.7706	1.4699	1.21244
14_"Micro-Tom"	10	23.2956	1.52506	1.23491
14_"Micro-Tom"	10	24.3153	1.01961	1.00995
14_"Micro-Tom"	10	25.2227	0.907489	0.952365
14_"Micro-Tom"	10	25.9339	0.7112	0.843208
14_"Micro-Tom"	10	26.5892	0.655295	0.809321
14_"Micro-Tom"	10	27.8331	1.24385	1.11535
14_"Micro-Tom"	10	29.0603	1.22717	1.1077
14_"Micro-Tom"	10	29.7453	0.685052	0.827647
14_"Micro-Tom"	10	30.6125	0.867211	0.931128
14_"Micro-Tom"	10	31.7907	1.17817	1.08536
14_"Micro-Tom"	10	32.6351	0.844363	0.918695
14_"Micro-Tom"	10	34.0016	1.36649	1.16876
14_"Micro-Tom"	10	34.8154	0.813858	0.902219
14_"Micro-Tom"	10	35.2218	0.4064	0.637181
14_"Micro-Tom"	10	36.1478	0.925978	0.962289
14_"Micro-Tom"	10	38.0495	1.9017	1.37913
14_"Micro-Tom"	11	2.27579	1.04065	1.02029
14_"Micro-Tom"	11	2.78559	0.509805	0.714143
14_"Micro-Tom"	11	4.5113	1.7257	1.31377
14_"Micro-Tom"	11	6.82917	2.31787	1.5225
14_"Micro-Tom"	11	8.73884	1.90967	1.38203
14_"Micro-Tom"	11	9.84081	1.10197	1.04976
14_"Micro-Tom"	11	11.7058	1.86503	1.36565
14_"Micro-Tom"	11	12.5818	0.875926	0.935949
14_"Micro-Tom"	11	15.322	2.74021	1.65529
14_"Micro-Tom"	11	15.6627	0.340721	0.583952
14_"Micro-Tom"	11	17.2062	1.54355	1.24258
14_"Micro-Tom"	11	19.1185	1.91222	1.38275
14_"Micro-Tom"	11	20.9019	1.78342	1.33529
14_"Micro-Tom"	11	22.3279	1.42601	1.19415
14_"Micro-Tom"	11	23.1407	0.8128	0.901665
14_"Micro-Tom"	11	24.7078	1.56714	1.2518
14_"Micro-Tom"	11	25.4909	0.783043	0.884873
14_"Micro-Tom"	11	26.8574	1.36649	1.16876
14_"Micro-Tom"	11	28.0671	1.20974	1.1
14_"Micro-Tom"	11	28.6172	0.550084	0.74162
14_"Micro-Tom"	11	29.1437	0.52649	0.725259
14_"Micro-Tom"	11	30.6626	1.51889	1.23248
14_"Micro-Tom"	11	32.389	1.72645	1.31377
14_"Micro-Tom"	11	33.9729	1.58383	1.25857
14_"Micro-Tom"	11	34.5571	0.5842	0.764199
14_"Micro-Tom"	11	35.3499	0.792815	0.890505
14_"Micro-Tom"	11	36.5491	1.19922	1.09499
14_"Micro-Tom"	11	36.7795	0.230405	0.479583
14_"Micro-Tom"	11	38.5647	1.78522	1.33604
14_"Micro-Tom"	11	40.0074	1.44269	1.20125
14_"Micro-Tom"	11	40.2273	0.219884	0.469042
14_"Micro-Tom"	11	41.4229	1.19561	1.09362
14_"Micro-Tom"	11	41.5858	0.162921	0.403733
14_"Micro-Tom"	12	1.72571	0.896969	0.947101
14_"Micro-Tom"	12	3.68617	1.96047	1.4
14_"Micro-Tom"	12	5.37776	1.69159	1.30077
14_"Micro-Tom"	12	7.27074	1.89298	1.37586
14_"Micro-Tom"	12	9.9609	2.69016	1.64012
14_"Micro-Tom"	12	11.1645	1.20357	1.09727
14_"Micro-Tom"	12	11.8608	0.696321	0.834266
14_"Micro-Tom"	12	12.4442	0.583452	0.763544
14_"Micro-Tom"	12	14.0665	1.6223	1.27358
14_"Micro-Tom"	12	15.3148	1.24821	1.11714
14_"Micro-Tom"	12	16.8583	1.54355	1.24258
14_"Micro-Tom"	12	18.0049	1.14661	1.07098
14_"Micro-Tom"	12	18.4236	0.418726	0.647302
14_"Micro-Tom"	12	19.8261	1.40242	1.18406
14_"Micro-Tom"	12	20.7992	0.973168	0.986408
14_"Micro-Tom"	12	22.2666	1.46735	1.2112
14_"Micro-Tom"	12	22.3174	0.0508	0.225832
14_"Micro-Tom"	12	24.5391	2.22169	1.49064
14_"Micro-Tom"	12	25.2836	0.744568	0.863134
14_"Micro-Tom"	12	26.9411	1.65747	1.28725
14_"Micro-Tom"	12	28.1526	1.21154	1.10091
14_"Micro-Tom"	12	28.9691	0.81641	0.903327
14_"Micro-Tom"	12	30.0834	1.1143	1.05546
14_"Micro-Tom"	12	31.5717	1.48839	1.21984
14_"Micro-Tom"	12	31.7749	0.2032	0.450555
14_"Micro-Tom"	12	33.2484	1.47351	1.21408
14_"Micro-Tom"	12	33.3501	0.1016	0.319374
14_"Micro-Tom"	12	34.8297	1.47967	1.21655
14_"Micro-Tom"	13	2.01743	1.19486	1.09316
14_"Micro-Tom"	13	2.55699	0.539563	0.734847
14_"Micro-Tom"	13	10.105	1.00037	1
14_"Micro-Tom"	13	11.4566	1.35162	1.16276
14_"Micro-Tom"	13	16.2825	1.43217	1.19666
14_"Micro-Tom"	13	17.6737	1.39115	1.17941
14_"Micro-Tom"	13	18.6127	0.939052	0.96902
14_"Micro-Tom"	13	20.0819	1.46915	1.21202
14_"Micro-Tom"	13	21.8689	1.78703	1.33679
14_"Micro-Tom"	13	24.2122	2.34327	1.53069
14_"Micro-Tom"	13	26.5493	2.33711	1.52872
14_"Micro-Tom"	13	28.3073	1.75802	1.3259
14_"Micro-Tom"	13	28.4194	0.112121	0.334664
14_"Micro-Tom"	13	29.9278	1.50837	1.22801
14_"Micro-Tom"	13	31.3258	1.39806	1.18237
14_"Micro-Tom"	13	33.6383	2.31246	1.52053
14_"Micro-Tom"	13	35.5066	1.86833	1.36675
14_"Micro-Tom"	13	36.7215	1.21484	1.10227
14_"Micro-Tom"	14	1.50837	0.183963	0.428952
14_"Micro-Tom"	14	3.0193	1.51093	1.22923
14_"Micro-Tom"	14	5.19859	2.17929	1.47614
14_"Micro-Tom"	14	6.66488	1.46629	1.21078
14_"Micro-Tom"	14	7.12389	0.459005	0.677495
14_"Micro-Tom"	14	8.91421	1.79033	1.33791
14_"Micro-Tom"	14	9.77962	0.865405	0.930054
14_"Micro-Tom"	14	11.1294	1.34981	1.1619
14_"Micro-Tom"	14	12.517	1.38754	1.17813
14_"Micro-Tom"	14	13.7652	1.24821	1.11714
14_"Micro-Tom"	14	15.1404	1.37521	1.1726
14_"Micro-Tom"	14	16.6908	1.55046	1.24499
14_"Micro-Tom"	14	17.4231	0.732242	0.85557
14_"Micro-Tom"	14	17.8567	0.433605	0.658787
14_"Micro-Tom"	14	18.4619	0.605242	0.777817
14_"Micro-Tom"	14	19.3186	0.856689	0.925743
14_"Micro-Tom"	14	20.4337	1.11505	1.05594
14_"Micro-Tom"	14	21.3753	0.941605	0.970567
14_"Micro-Tom"	14	21.8764	0.501089	0.707814
14_"Micro-Tom"	14	23.417	1.54068	1.24137
14_"Micro-Tom"	14	23.4784	0.061321	0.246982
14_"Micro-Tom"	14	25.055	1.57661	1.25579
14_"Micro-Tom"	14	25.4947	0.439768	0.663325
14_"Micro-Tom"	14	27.3718	1.87705	1.37004
14_"Micro-Tom"	14	29.382	2.01021	1.41774
14_"Micro-Tom"	14	30.0758	0.693768	0.833067
14_"Micro-Tom"	14	30.8483	0.772521	0.879204
14_"Micro-Tom"	14	31.2416	0.393326	0.626897
14_"Micro-Tom"	14	33.0381	1.79649	1.34015
14_"Micro-Tom"	14	34.1873	1.14916	1.07191
14_"Micro-Tom"	14	35.2559	1.06861	1.03392
14_"Micro-Tom"	14	36.1467	0.890805	0.943928
14_"Micro-Tom"	14	37.8354	1.68873	1.29962
14_"Micro-Tom"	14	38.3496	0.514163	0.716938
14_"Micro-Tom"	14	39.9113	1.56173	1.2498
14_"Micro-Tom"	14	40.1504	0.239121	0.488876
14_"Micro-Tom"	14	41.0561	0.905684	0.95184
14_"Micro-Tom"	14	42.2745	1.21845	1.10363
14_"Micro-Tom"	14	43.1654	0.890806	0.943928
14_"Micro-Tom"	15	2.01743	1.14406	1.06958
[truncated: 785 more rows]

## Sheet: LR length
Genotype	plant	length LR	SQRT			genotype	Recuento	Promedio	Mediana	DE	CV	Mínimo	Máximo	Rango	Sesgo	Curtosis			genotype	Casos	Media	Grupos Homogéneos
01_S. corneliomulleri	2	5.7468	2.39725			01_S. corneliomulleri	95	2.89825	2.452	1.54573	0.533332	0.264	6.848	6.584	2.76926	-0.722537			05_S. chielewskii	20	1.378	X	a
01_S. corneliomulleri	2	5.70402	2.38831			02_S. peruvianum	161	5.41403	5.396	2.80254	0.517645	0.708	12.295	11.587	1.04786	-2.18966			01_S. corneliomulleri	95	1.64105	X	a
01_S. corneliomulleri	2	2.16783	1.47235			03_S. chilense	129	4.52809	4.092	2.55665	0.56462	0.53	10.843	10.313	2.9478	-0.906923			08_S. cheesmaniae	39	1.77026	XXXX	abcd
01_S. corneliomulleri	2	6.66183	2.58105			04_S. huaylasense	102	4.61471	3.8525	2.91961	0.632675	0.518	10.763	10.245	2.28184	-1.579			06_S. arcanum	75	1.7716	XX	ab
01_S. corneliomulleri	2	1.52264	1.23395			05_S. chielewskii	20	1.9618	1.8855	0.732198	0.373228	0.885	3.602	2.717	1.05986	-0.0352894			07_S. galapagense	57	1.79053	XXX	abc
01_S. corneliomulleri	2	3.83694	1.95881			06_S. arcanum	75	3.31767	2.87	1.62017	0.488347	1.09	7.565	6.475	3.11801	-0.351144			04_S. huaylasense	102	2.03186	XXXXX	bcdef
01_S. corneliomulleri	2	1.89934	1.37817			07_S. galapagense	57	3.71181	3.127	2.71862	0.732424	0.325	9.939	9.614	2.11072	-0.968571			03_S. chilense	129	2.0393	XXXX	cdef
01_S. corneliomulleri	2	3.35599	1.83194			08_S. cheesmaniae	39	3.442	3.455	1.99078	0.578379	0.651	7.091	6.44	0.692867	-1.70161			11_"Craigella"	370	2.05211	XX	de
01_S. corneliomulleri	2	2.22918	1.49304			09_S. pimpinelifollium	283	4.76795	4.451	2.77993	0.583046	0.338	11.902	11.564	3.272	-2.27846			09_S. pimpinelifollium	283	2.07989	XX	ef
01_S. corneliomulleri	4	2.59535	1.61101			10_"Ailsa Craig"	252	5.88442	5.7475	3.3251	0.565068	0.427	13.424	12.997	1.92806	-2.74302			02_S. peruvianum	161	2.23584	XX	fg
01_S. corneliomulleri	4	2.53892	1.5934			11_"Craigella"	370	4.65302	4.279	2.81636	0.605275	0.527	11.862	11.335	4.93609	-1.93966			10_"Ailsa Craig"	252	2.31345	X	g
01_S. corneliomulleri	4	5.08781	2.25562			12_"Moneymaker"	105	6.46911	5.745	3.6761	0.568255	0.898	14.479	13.581	1.43931	-2.05052			13_"M82"	124	2.36323	X	g
01_S. corneliomulleri	4	3.28219	1.81168			13_"M82"	124	6.28331	6.118	4.01283	0.638649	0.737	16.326	15.589	2.16864	-1.55949			12_"Moneymaker"	105	2.4279	X	g
01_S. corneliomulleri	4	1.90234	1.37925
01_S. corneliomulleri	4	2.09923	1.44887			Total	1812	4.88295	4.38	3.05981	0.626631	0.264	16.326	16.062	12.3377	-1.5894
01_S. corneliomulleri	4	1.97161	1.40414
01_S. corneliomulleri	4	2.49314	1.57897
01_S. corneliomulleri	4	1.65162	1.28515
01_S. corneliomulleri	5	4.62639	2.1509			genotype	Recuento	Promedio	Mediana	DE	CV	Mínimo	Máximo	Rango	Sesgo	Curtosis			genotype	Casos	Media	Grupos Homogéneos
01_S. corneliomulleri	5	1.93267	1.39021			14_"Micro-Tom"	306	3.62357	2.89	2.39331	0.660484	0.47	10.704	10.234	6.21352	-0.248035			19_Never ripe	107	1.53449	X	a
01_S. corneliomulleri	5	6.05966	2.46164			15_anthocyanin absent	58	5.35455	3.7475	3.94451	0.736664	0.414	12.927	12.513	1.76599	-1.72702			20_sitiens	42	1.59548	XX	ab
01_S. corneliomulleri	5	2.73293	1.65316			16_anthocyaninless	368	4.51962	4.2495	2.61652	0.578925	0.281	11.764	11.483	4.91899	-0.820957			18_lutescent	101	1.7295	XXX	abc
01_S. corneliomulleri	5	1.37221	1.17141			17_bushy	102	4.18002	2.6995	3.21346	0.768766	0.558	11.632	11.074	3.34376	-1.53415			14_"Micro-Tom"	306	1.8017	XX	bc
01_S. corneliomulleri	5	1.93432	1.3908			18_lutescent	101	3.18567	3.078	1.58223	0.49667	0.806	6.988	6.182	2.65215	-0.412183			17_bushy	102	1.89627	XX	cd
01_S. corneliomulleri	6	1.74002	1.3191			19_Never ripe	107	2.59018	2.088	1.59187	0.614579	0.51	6.983	6.473	3.36709	-0.641222			16_anthocyaninless	368	2.03076	X	d
01_S. corneliomulleri	6	3.73201	1.93184			20_sitiens	42	3.20402	1.541	3.27539	1.02227	0.486	10.479	9.993	3.26266	-0.109498			15_anthocyanin absent	58	2.14724	X	d
01_S. corneliomulleri	6	1.07995	1.03921
01_S. corneliomulleri	6	0.672918	0.820316			Total	1084	3.91368	3.2385	2.66623	0.68126	0.281	12.927	12.646	12.9194	1.7889
01_S. corneliomulleri	6	1.27492	1.12912
01_S. corneliomulleri	7	2.38985	1.54591
01_S. corneliomulleri	7	5.21187	2.28295																genotype	Recuento	Promedio	Mediana	DE	CV	Mínimo	Máximo	Rango	Sesgo	Curtosis
01_S. corneliomulleri	7	3.16238	1.77831																01_S. corneliomulleri	92	1.62652	1.56	0.447055	0.274853	0.51	2.62	2.11	0.732887	-0.947855
01_S. corneliomulleri	7	5.40468	2.3248																02_S. peruvianum	161	2.23584	2.32	0.646213	0.289025	0.84	3.51	2.67	-1.53203	-1.99145
01_S. corneliomulleri	7	4.65044	2.15649																03_S. chilense	129	2.0393	2.02	0.61004	0.299141	0.73	3.29	2.56	0.446927	-1.66653
01_S. corneliomulleri	7	1.98514	1.40895																04_S. huaylasense	102	2.03186	1.96	0.701055	0.345031	0.72	3.28	2.56	0.250608	-2.04942
01_S. corneliomulleri	7	0.263565	0.513386																05_S. chielewskii	20	1.378	1.375	0.260356	0.188938	0.94	1.9	0.96	0.369785	-0.436997
01_S. corneliomulleri	8	5.57204	2.36052																06_S. arcanum	75	1.7716	1.69	0.427637	0.241384	1.04	2.75	1.71	1.88291	-1.15208
01_S. corneliomulleri	8	2.45352	1.56637																07_S. galapagense	57	1.79053	1.77	0.717634	0.400795	0.57	3.15	2.58	0.699559	-1.78345
01_S. corneliomulleri	8	2.28792	1.51259																08_S. cheesmaniae	39	1.77026	1.86	0.560824	0.316804	0.81	2.66	1.85	-0.13346	-1.69553
01_S. corneliomulleri	10	2.86916	1.69386																09_S. pimpinelifollium	283	2.07989	2.11	0.665366	0.319904	0.58	3.45	2.87	-0.468006	-2.80412
01_S. corneliomulleri	10	3.92862	1.98207																10_"Ailsa Craig"	252	2.31345	2.4	0.731379	0.316142	0.65	3.66	3.01	-1.24335	-3.08048
01_S. corneliomulleri	10	6.2205	2.49409																11_"Craigella"	370	2.05211	2.07	0.665272	0.32419	0.73	3.44	2.71	0.831512	-3.39719
01_S. corneliomulleri	10	2.37304	1.54047																12_"Moneymaker"	105	2.4279	2.4	0.760962	0.313423	0.95	3.81	2.86	-0.505445	-2.00927
01_S. corneliomulleri	10	1.63085	1.27705																13_"M82"	124	2.36323	2.475	0.839329	0.355162	0.86	4.04	3.18	-0.0740976	-2.48268
01_S. corneliomulleri	10	1.86408	1.36531																14_"Micro-Tom"	306	1.8017	1.7	0.615188	0.341449	0.69	3.27	2.58	2.78161	-3.07875
01_S. corneliomulleri	10	2.45188	1.56585																15_anthocyanin absent	58	2.14724	1.935	0.870319	0.40532	0.64	3.6	2.96	0.702408	-2.10703
01_S. corneliomulleri	10	1.92543	1.3876																16_anthocyaninless	368	2.03076	2.065	0.629857	0.310158	0.53	3.43	2.9	0.428333	-2.94434
01_S. corneliomulleri	10	3.10035	1.76078																17_bushy	102	1.89627	1.645	0.76798	0.404994	0.75	3.41	2.66	1.90341	-2.33276
01_S. corneliomulleri	10	0.773206	0.879321																18_lutescent	101	1.7295	1.75	0.443758	0.256581	0.9	2.64	1.74	0.680651	-1.4116
01_S. corneliomulleri	10	0.911751	0.954857																19_Never ripe	107	1.53449	1.45	0.485467	0.316371	0.71	2.64	1.93	1.51972	-1.88119
01_S. corneliomulleri	11	5.18345	2.27672																20_sitiens	42	1.59548	1.245	0.823053	0.515866	0.7	3.24	2.54	2.54538	-0.804066
01_S. corneliomulleri	11	6.8482	2.61691
01_S. corneliomulleri	11	2.99446	1.73045																Total	2893	2.00926	1.97	0.694972	0.345885	0.51	4.04	3.53	5.40945	-8.84226
01_S. corneliomulleri	11	4.48676	2.1182
01_S. corneliomulleri	12	3.49714	1.87006
01_S. corneliomulleri	12	3.66806	1.91522
01_S. corneliomulleri	12	3.33058	1.82499
01_S. corneliomulleri	12	2.21333	1.48773
01_S. corneliomulleri	13	3.72816	1.93084
01_S. corneliomulleri	13	3.55028	1.88422
01_S. corneliomulleri	13	3.93858	1.98459
01_S. corneliomulleri	13	5.73367	2.39451
01_S. corneliomulleri	13	1.54573	1.24327
01_S. corneliomulleri	13	1.58071	1.25726
01_S. corneliomulleri	14	5.29631	2.30137
01_S. corneliomulleri	14	3.32141	1.82247
01_S. corneliomulleri	14	4.29191	2.07169
01_S. corneliomulleri	14	4.61382	2.14798
01_S. corneliomulleri	14	3.31049	1.81947
01_S. corneliomulleri	14	2.30841	1.51935
01_S. corneliomulleri	15	3.89868	1.97451
01_S. corneliomulleri	15	4.05772	2.01438
01_S. corneliomulleri	15	2.08078	1.44249
01_S. corneliomulleri	15	1.23434	1.11101
01_S. corneliomulleri	16	2.28068	1.51019
01_S. corneliomulleri	16	1.46757	1.21143
01_S. corneliomulleri	16	1.3442	1.15939
01_S. corneliomulleri	16	1.42932	1.19554
01_S. corneliomulleri	17	1.81558	1.34743
01_S. corneliomulleri	17	0.713497	0.844688
01_S. corneliomulleri	17	1.29569	1.13829
01_S. corneliomulleri	18	1.26304	1.12385
01_S. corneliomulleri	18	0.948368	0.973842
01_S. corneliomulleri	18	2.13913	1.46258
01_S. corneliomulleri	19	4.65236	2.15693
01_S. corneliomulleri	19	2.74318	1.65625
01_S. corneliomulleri	19	3.27619	1.81002
01_S. corneliomulleri	19	3.31281	1.82011
01_S. corneliomulleri	19	1.84359	1.35779
01_S. corneliomulleri	19	1.85055	1.36035
01_S. corneliomulleri	19	1.53385	1.23849
01_S. corneliomulleri	21	4.68173	2.16373
01_S. corneliomulleri	21	1.99566	1.41268
01_S. corneliomulleri	21	1.44776	1.20323
01_S. corneliomulleri	21	1.24951	1.11782
02_S. peruvianum	1	4.25693	2.06323
02_S. peruvianum	1	4.04175	2.01041
02_S. peruvianum	1	9.97419	3.15819
02_S. peruvianum	1	3.20556	1.79041
02_S. peruvianum	1	6.48107	2.54579
02_S. peruvianum	1	4.28783	2.07071
02_S. peruvianum	1	8.09375	2.84495
02_S. peruvianum	1	7.76199	2.78604
02_S. peruvianum	1	2.23614	1.49537
02_S. peruvianum	1	4.00718	2.00179
02_S. peruvianum	1	1.84688	1.359
02_S. peruvianum	1	3.87627	1.96883
02_S. peruvianum	2	6.93044	2.63257
02_S. peruvianum	2	7.75611	2.78498
02_S. peruvianum	2	10.3636	3.21926
02_S. peruvianum	2	4.79215	2.1891
02_S. peruvianum	2	3.82777	1.95647
02_S. peruvianum	2	6.36986	2.52386
02_S. peruvianum	2	1.89702	1.37732
02_S. peruvianum	2	5.43745	2.33183
02_S. peruvianum	2	2.64617	1.62671
02_S. peruvianum	2	5.21243	2.28307
02_S. peruvianum	2	3.35735	1.83231
02_S. peruvianum	3	6.32611	2.51518
02_S. peruvianum	3	5.66084	2.37925
02_S. peruvianum	3	6.95749	2.63771
02_S. peruvianum	3	8.5498	2.924
02_S. peruvianum	3	8.24141	2.87079
02_S. peruvianum	3	7.62249	2.76089
02_S. peruvianum	3	7.22422	2.68779
02_S. peruvianum	3	5.39563	2.32285
02_S. peruvianum	3	12.2953	3.50647
02_S. peruvianum	3	2.81177	1.67683
02_S. peruvianum	3	9.21128	3.03501
02_S. peruvianum	3	2.15662	1.46854
02_S. peruvianum	4	4.17741	2.04387
02_S. peruvianum	4	5.56683	2.35941
02_S. peruvianum	4	2.70752	1.64545
02_S. peruvianum	4	3.06837	1.75168
02_S. peruvianum	4	8.6657	2.94376
02_S. peruvianum	4	0.807502	0.898611
02_S. peruvianum	4	2.96508	1.72194
02_S. peruvianum	4	2.785	1.66883
02_S. peruvianum	5	9.78239	3.12768
02_S. peruvianum	5	4.10514	2.02612
02_S. peruvianum	5	12.0647	3.47343
02_S. peruvianum	5	10.1856	3.19149
02_S. peruvianum	5	8.15822	2.85626
02_S. peruvianum	5	0.707895	0.841365
02_S. peruvianum	5	0.750115	0.866092
02_S. peruvianum	7	10.3061	3.21031
02_S. peruvianum	7	10.557	3.24915
02_S. peruvianum	7	3.05853	1.74886
02_S. peruvianum	7	5.88178	2.42524
02_S. peruvianum	7	0.861607	0.928228
02_S. peruvianum	7	5.38335	2.3202
02_S. peruvianum	7	3.6667	1.91486
02_S. peruvianum	7	6.69409	2.58729
02_S. peruvianum	7	2.1062	1.45127
02_S. peruvianum	7	3.0364	1.74253
02_S. peruvianum	7	1.29405	1.13756
02_S. peruvianum	7	2.21073	1.48685
02_S. peruvianum	7	0.821028	0.906106
02_S. peruvianum	7	1.15947	1.07679
02_S. peruvianum	7	1.08227	1.04032
02_S. peruvianum	8	4.13355	2.03311
02_S. peruvianum	8	4.75373	2.1803
02_S. peruvianum	8	5.84777	2.41822
02_S. peruvianum	8	6.68792	2.5861
02_S. peruvianum	8	1.42399	1.19331
02_S. peruvianum	8	5.95626	2.44055
02_S. peruvianum	8	5.43881	2.33213
02_S. peruvianum	8	7.41535	2.72311
02_S. peruvianum	8	5.32992	2.30866
02_S. peruvianum	8	4.32705	2.08016
02_S. peruvianum	9	4.05007	2.01248
02_S. peruvianum	9	3.2647	1.80685
02_S. peruvianum	9	4.96947	2.22923
02_S. peruvianum	9	7.18648	2.68076
02_S. peruvianum	9	6.4629	2.54222
02_S. peruvianum	9	4.90416	2.21453
02_S. peruvianum	9	3.85154	1.96253
02_S. peruvianum	9	4.46407	2.11283
02_S. peruvianum	9	6.13974	2.47785
02_S. peruvianum	9	10.6719	3.26679
02_S. peruvianum	9	1.92735	1.38829
02_S. peruvianum	9	4.90908	2.21564
02_S. peruvianum	10	4.58185	2.14052
02_S. peruvianum	10	8.77579	2.9624
02_S. peruvianum	10	3.18355	1.78425
02_S. peruvianum	10	8.23841	2.87026
02_S. peruvianum	10	9.56144	3.09216
02_S. peruvianum	10	9.91873	3.1494
02_S. peruvianum	10	9.71612	3.11707
02_S. peruvianum	10	9.31457	3.05198
02_S. peruvianum	10	7.30606	2.70297
02_S. peruvianum	10	10.8022	3.28668
02_S. peruvianum	10	7.88293	2.80766
02_S. peruvianum	10	2.10455	1.45071
02_S. peruvianum	10	6.44349	2.5384
02_S. peruvianum	10	3.53019	1.87888
02_S. peruvianum	11	8.84574	2.97418
02_S. peruvianum	11	8.23513	2.86969
02_S. peruvianum	11	7.3141	2.70446
02_S. peruvianum	11	9.13324	3.02213
02_S. peruvianum	11	7.05586	2.65629
02_S. peruvianum	11	3.07165	1.75261
02_S. peruvianum	11	1.95016	1.39648
02_S. peruvianum	11	2.05045	1.43194
02_S. peruvianum	11	6.14727	2.47937
02_S. peruvianum	11	1.26932	1.12664
02_S. peruvianum	11	6.15355	2.48064
02_S. peruvianum	11	6.50048	2.5496
02_S. peruvianum	11	4.37635	2.09197
02_S. peruvianum	12	7.64422	2.76482
02_S. peruvianum	12	6.01076	2.45169
02_S. peruvianum	12	8.31714	2.88394
02_S. peruvianum	12	5.83928	2.41646
02_S. peruvianum	12	7.98742	2.8262
02_S. peruvianum	12	7.9135	2.81309
02_S. peruvianum	12	8.0049	2.82929
02_S. peruvianum	12	7.64201	2.76442
02_S. peruvianum	12	8.65433	2.94182
02_S. peruvianum	12	3.58169	1.89254
02_S. peruvianum	12	5.6983	2.38711
02_S. peruvianum	12	5.51601	2.34862
02_S. peruvianum	12	6.5513	2.55955
02_S. peruvianum	12	2.73621	1.65415
02_S. peruvianum	13	8.41482	2.90083
02_S. peruvianum	13	6.53393	2.55616
02_S. peruvianum	13	4.56436	2.13644
02_S. peruvianum	13	7.6196	2.76036
02_S. peruvianum	13	5.95966	2.44124
02_S. peruvianum	13	2.36976	1.5394
02_S. peruvianum	13	5.37978	2.31944
02_S. peruvianum	13	9.50462	3.08296
02_S. peruvianum	13	5.74256	2.39636
02_S. peruvianum	13	1.80862	1.34485
02_S. peruvianum	13	4.75361	2.18028
02_S. peruvianum	13	1.26468	1.12458
02_S. peruvianum	13	2.10852	1.45207
02_S. peruvianum	14	9.60655	3.09944
02_S. peruvianum	14	6.1668	2.4833
02_S. peruvianum	14	7.78525	2.79021
02_S. peruvianum	14	9.21536	3.03568
02_S. peruvianum	14	5.45398	2.33538
02_S. peruvianum	14	3.91974	1.97983
02_S. peruvianum	14	2.67555	1.63571
02_S. peruvianum	14	3.04336	1.74452
02_S. peruvianum	14	1.52196	1.23368
02_S. peruvianum	18	8.16263	2.85703
02_S. peruvianum	18	3.19939	1.78868
02_S. peruvianum	18	3.81713	1.95375
02_S. peruvianum	18	1.42003	1.19165
02_S. peruvianum	18	1.3099	1.14451
02_S. peruvianum	20	2.03392	1.42616
02_S. peruvianum	20	8.69236	2.94828
02_S. peruvianum	20	0.830593	0.911369
02_S. peruvianum	20	4.52406	2.12698
02_S. peruvianum	20	2.44888	1.56489
02_S. peruvianum	20	4.40136	2.09794
03_S. chilense	1	1.3897	1.17885
03_S. chilense	1	1.46757	1.21143
03_S. chilense	1	5.13999	2.26715
03_S. chilense	1	6.64871	2.57851
03_S. chilense	1	8.78076	2.96323
03_S. chilense	1	8.03965	2.83543
03_S. chilense	1	5.79723	2.40774
03_S. chilense	1	2.93407	1.71291
03_S. chilense	2	4.26418	2.06499
03_S. chilense	2	8.22189	2.86738
03_S. chilense	2	7.69244	2.77352
03_S. chilense	2	1.58631	1.25949
03_S. chilense	2	6.91431	2.62951
03_S. chilense	2	4.19983	2.04935
03_S. chilense	2	5.57204	2.36052
03_S. chilense	2	4.46135	2.11219
03_S. chilense	2	2.07682	1.44112
03_S. chilense	2	4.48348	2.11742
03_S. chilense	2	1.47482	1.21442
03_S. chilense	2	0.903827	0.950698
03_S. chilense	3	2.90838	1.7054
03_S. chilense	3	3.1617	1.77812
03_S. chilense	3	2.81137	1.67671
03_S. chilense	3	2.69535	1.64175
03_S. chilense	4	3.041	1.74385
03_S. chilense	4	2.95852	1.72003
03_S. chilense	4	3.33098	1.8251
03_S. chilense	4	7.04957	2.6551
03_S. chilense	4	9.29748	3.04918
03_S. chilense	4	10.8433	3.29292
03_S. chilense	4	8.78003	2.96311
03_S. chilense	4	3.31813	1.82157
03_S. chilense	5	4.78995	2.18859
03_S. chilense	5	6.38582	2.52702
03_S. chilense	5	4.09162	2.02277
03_S. chilense	5	7.93851	2.81754
03_S. chilense	5	8.64097	2.93955
03_S. chilense	5	6.15955	2.48184
03_S. chilense	5	3.81356	1.95283
03_S. chilense	5	2.33711	1.52876
03_S. chilense	7	7.12937	2.67009
03_S. chilense	7	3.74661	1.93562
03_S. chilense	9	8.84987	2.97487
03_S. chilense	9	5.32868	2.30839
03_S. chilense	9	4.16853	2.0417
03_S. chilense	9	5.14327	2.26788
03_S. chilense	9	2.65834	1.63044
03_S. chilense	9	1.58959	1.26079
03_S. chilense	10	4.23248	2.0573
03_S. chilense	10	3.97412	1.99352
03_S. chilense	10	2.46937	1.57142
03_S. chilense	10	7.04249	2.65377
03_S. chilense	10	3.29232	1.81447
03_S. chilense	10	5.10982	2.26049
03_S. chilense	10	6.0433	2.45831
03_S. chilense	10	2.75998	1.66132
03_S. chilense	10	4.28755	2.07064
03_S. chilense	10	2.52047	1.5876
03_S. chilense	11	3.78419	1.9453
03_S. chilense	11	5.33348	2.30943
03_S. chilense	11	6.09028	2.46785
03_S. chilense	11	3.71588	1.92766
03_S. chilense	11	2.05073	1.43204
03_S. chilense	11	3.59114	1.89503
03_S. chilense	12	9.33517	3.05535
03_S. chilense	12	10.7518	3.279
03_S. chilense	12	8.16574	2.85758
03_S. chilense	12	6.0381	2.45725
03_S. chilense	12	1.00412	1.00206
03_S. chilense	12	1.70805	1.30692
03_S. chilense	12	2.2487	1.49957
03_S. chilense	12	0.769244	0.877066
03_S. chilense	12	1.35212	1.16281
03_S. chilense	13	4.82464	2.19651
03_S. chilense	13	7.71553	2.77768
03_S. chilense	13	8.99577	2.9993
03_S. chilense	13	9.38736	3.06388
03_S. chilense	13	1.3841	1.17648
03_S. chilense	13	1.04005	1.01983
03_S. chilense	13	3.74033	1.93399
03_S. chilense	13	4.48841	2.11859
03_S. chilense	13	1.15319	1.07386
03_S. chilense	13	0.530411	0.728293
03_S. chilense	14	5.44674	2.33382
03_S. chilense	14	5.78682	2.40558
03_S. chilense	14	8.22585	2.86807
03_S. chilense	14	10.2541	3.2022
03_S. chilense	14	4.37391	2.09139
03_S. chilense	14	6.44853	2.5394
03_S. chilense	14	6.16832	2.48361
03_S. chilense	14	4.84965	2.20219
03_S. chilense	14	3.9696	1.99238
03_S. chilense	14	3.32469	1.82337
03_S. chilense	14	3.71684	1.92791
03_S. chilense	14	3.60807	1.89949
03_S. chilense	14	2.55149	1.59734
03_S. chilense	14	4.76782	2.18353
03_S. chilense	14	1.79345	1.3392
03_S. chilense	15	1.69877	1.30337
03_S. chilense	15	5.6674	2.38063
03_S. chilense	15	2.15826	1.4691
03_S. chilense	15	3.51695	1.87535
03_S. chilense	15	3.53347	1.87975
03_S. chilense	17	2.54752	1.5961
03_S. chilense	17	6.40427	2.53067
03_S. chilense	17	5.22896	2.28669
03_S. chilense	17	4.42349	2.10321
03_S. chilense	17	4.57228	2.13829
03_S. chilense	18	10.3212	3.21266
03_S. chilense	18	7.26356	2.6951
03_S. chilense	18	7.57426	2.75214
03_S. chilense	18	4.79815	2.19047
03_S. chilense	18	3.52527	1.87757
03_S. chilense	18	2.2345	1.49482
03_S. chilense	18	2.67254	1.63479
03_S. chilense	18	1.08227	1.04032
03_S. chilense	19	10.3523	3.21749
03_S. chilense	19	1.59655	1.26355
03_S. chilense	19	3.84814	1.96167
03_S. chilense	19	2.97533	1.72491
03_S. chilense	20	2.17383	1.47439
03_S. chilense	20	1.81654	1.34779
03_S. chilense	20	2.00755	1.41688
03_S. chilense	20	2.47689	1.57381
03_S. chilense	24	5.56468	2.35896
03_S. chilense	24	5.26529	2.29462
03_S. chilense	24	0.852043	0.923062
03_S. chilense	24	2.80385	1.67447
03_S. chilense	24	1.93664	1.39163
04_S. huaylasense	1	3.84514	1.9609
04_S. huaylasense	1	8.52891	2.92043
04_S. huaylasense	1	2.87176	1.69463
04_S. huaylasense	1	6.66251	2.58118
04_S. huaylasense	1	5.78534	2.40527
04_S. huaylasense	1	6.37122	2.52413
04_S. huaylasense	1	5.90351	2.42971
04_S. huaylasense	1	0.871172	0.933366
04_S. huaylasense	2	3.00538	1.7336
04_S. huaylasense	2	7.48762	2.73635
04_S. huaylasense	2	10.4736	3.23629
04_S. huaylasense	2	4.88983	2.2113
04_S. huaylasense	2	2.17875	1.47606
04_S. huaylasense	2	4.28427	2.06985
04_S. huaylasense	2	2.80249	1.67406
04_S. huaylasense	2	1.44941	1.20391
04_S. huaylasense	2	3.139	1.77172
04_S. huaylasense	2	1.72253	1.31245
04_S. huaylasense	3	2.49806	1.58053
04_S. huaylasense	3	2.0719	1.43941
04_S. huaylasense	3	8.01843	2.83168
04_S. huaylasense	3	9.51566	3.08475
04_S. huaylasense	3	8.50622	2.91654
04_S. huaylasense	3	7.52972	2.74403
04_S. huaylasense	3	1.99266	1.41162
04_S. huaylasense	3	4.57517	2.13896
04_S. huaylasense	3	2.63293	1.62263
04_S. huaylasense	3	0.723062	0.850331
04_S. huaylasense	4	7.28557	2.69918
04_S. huaylasense	4	7.60256	2.75727
04_S. huaylasense	4	9.78091	3.12745
04_S. huaylasense	4	4.8222	2.19595
04_S. huaylasense	4	1.95112	1.39683
04_S. huaylasense	4	3.75125	1.93682
04_S. huaylasense	4	3.86003	1.9647
04_S. huaylasense	4	1.81258	1.34632
04_S. huaylasense	6	10.5844	3.25337
04_S. huaylasense	6	10.7634	3.28076
04_S. huaylasense	6	7.87484	2.80622
04_S. huaylasense	6	8.9149	2.98578
04_S. huaylasense	6	10.6576	3.2646
04_S. huaylasense	6	6.89138	2.62514
04_S. huaylasense	7	10.3308	3.21416
04_S. huaylasense	7	9.34422	3.05683
04_S. huaylasense	7	6.92416	2.63138
04_S. huaylasense	7	6.57943	2.56504
04_S. huaylasense	7	0.869531	0.932486
04_S. huaylasense	7	1.45897	1.20788
04_S. huaylasense	7	0.588478	0.767123
04_S. huaylasense	9	2.70356	1.64425
04_S. huaylasense	9	1.29801	1.1393
04_S. huaylasense	9	0.917354	0.957786
04_S. huaylasense	9	1.31154	1.14522
04_S. huaylasense	9	0.696009	0.834272
04_S. huaylasense	9	0.517565	0.71942
04_S. huaylasense	10	2.534	1.59185
04_S. huaylasense	10	5.44102	2.3326
04_S. huaylasense	10	3.0077	1.73427
04_S. huaylasense	10	3.56585	1.88834
04_S. huaylasense	10	1.16179	1.07786
04_S. huaylasense	10	1.18584	1.08896
04_S. huaylasense	10	3.55356	1.88509
04_S. huaylasense	10	1.61897	1.27239
04_S. huaylasense	11	5.62518	2.37175
04_S. huaylasense	11	5.33649	2.31008
04_S. huaylasense	11	3.01359	1.73597
04_S. huaylasense	11	1.07039	1.0346
04_S. huaylasense	13	6.18609	2.48719
04_S. huaylasense	13	3.91277	1.97807
04_S. huaylasense	13	2.87708	1.6962
04_S. huaylasense	13	3.1278	1.76856
04_S. huaylasense	13	3.02915	1.74045
04_S. huaylasense	13	3.6757	1.91721
04_S. huaylasense	13	1.03841	1.01902
04_S. huaylasense	16	6.37337	2.52455
04_S. huaylasense	16	5.17565	2.275
04_S. huaylasense	16	6.6409	2.57699
04_S. huaylasense	16	7.02948	2.65132
04_S. huaylasense	16	2.84443	1.68654
04_S. huaylasense	16	3.00934	1.73475
04_S. huaylasense	16	3.92602	1.98142
04_S. huaylasense	16	2.34271	1.53059
04_S. huaylasense	17	7.50403	2.73935
04_S. huaylasense	17	10.2696	3.20462
04_S. huaylasense	17	2.15198	1.46696
04_S. huaylasense	17	4.62203	2.14989
04_S. huaylasense	17	6.23907	2.49781
04_S. huaylasense	17	3.67994	1.91832
04_S. huaylasense	17	3.54111	1.88178
04_S. huaylasense	17	2.11016	1.45264
04_S. huaylasense	19	4.53323	2.12914
04_S. huaylasense	19	4.91157	2.21621
04_S. huaylasense	19	10.6857	3.26889
04_S. huaylasense	19	1.02721	1.01351
04_S. huaylasense	19	3.98533	1.99633
04_S. huaylasense	21	8.19416	2.86254
04_S. huaylasense	21	6.39635	2.5291
04_S. huaylasense	21	8.96192	2.99365
04_S. huaylasense	21	5.90391	2.4298
04_S. huaylasense	21	2.95552	1.71916
04_S. huaylasense	21	2.06262	1.43618
04_S. huaylasense	21	2.23054	1.4935
05_S. chielewskii	1	1.40815	1.18665
05_S. chielewskii	1	2.33807	1.52907
05_S. chielewskii	7	3.6015	1.89776
05_S. chielewskii	7	1.49395	1.22227
05_S. chielewskii	8	1.40951	1.18723
05_S. chielewskii	8	0.884698	0.940584
05_S. chielewskii	8	2.34107	1.53005
05_S. chielewskii	9	1.92543	1.3876
05_S. chielewskii	9	1.66351	1.28977
05_S. chielewskii	11	1.84591	1.35864
05_S. chielewskii	11	1.54013	1.24102
05_S. chielewskii	11	3.29436	1.81504
05_S. chielewskii	11	1.36661	1.16902
05_S. chielewskii	11	2.50298	1.58208
05_S. chielewskii	11	1.04566	1.02257
05_S. chielewskii	13	2.43111	1.5592
05_S. chielewskii	13	2.41526	1.55411
05_S. chielewskii	14	1.03445	1.01708
05_S. chielewskii	14	2.56665	1.60208
05_S. chielewskii	14	2.12561	1.45795
06_S. arcanum	1	2.62008	1.61867
06_S. arcanum	1	2.06794	1.43803
06_S. arcanum	1	6.38254	2.52637
06_S. arcanum	2	2.13093	1.45977
06_S. arcanum	2	5.56819	2.3597
06_S. arcanum	2	3.89172	1.97274
06_S. arcanum	2	1.34652	1.1604
06_S. arcanum	2	2.01179	1.41838
06_S. arcanum	2	2.56665	1.60208
06_S. arcanum	3	2.97205	1.72396
06_S. arcanum	3	4.6231	2.15014
06_S. arcanum	3	2.40434	1.55059
06_S. arcanum	3	1.57743	1.25596
06_S. arcanum	4	5.87686	2.42422
06_S. arcanum	4	6.38282	2.52642
06_S. arcanum	4	4.1803	2.04458
06_S. arcanum	4	1.92775	1.38843
06_S. arcanum	4	2.20676	1.48552
06_S. arcanum	4	2.08475	1.44386
06_S. arcanum	4	5.58613	2.3635
06_S. arcanum	6	3.61503	1.90132
06_S. arcanum	6	6.21242	2.49247
06_S. arcanum	6	7.56538	2.75052
06_S. arcanum	6	4.61671	2.14865
06_S. arcanum	6	1.80862	1.34485
06_S. arcanum	8	4.47267	2.11487
06_S. arcanum	8	3.15485	1.77619
06_S. arcanum	8	1.89045	1.37494
06_S. arcanum	8	2.4542	1.56659
06_S. arcanum	8	2.58578	1.60804
06_S. arcanum	8	5.77753	2.40365
06_S. arcanum	8	1.26372	1.12415
06_S. arcanum	9	2.41951	1.55548
06_S. arcanum	9	2.18367	1.47773
06_S. arcanum	9	1.75027	1.32298
06_S. arcanum	9	1.91287	1.38306
06_S. arcanum	9	1.76804	1.32968
06_S. arcanum	9	2.07122	1.43917
06_S. arcanum	10	1.82842	1.35219
06_S. arcanum	10	1.0902	1.04412
06_S. arcanum	10	1.19773	1.09441
06_S. arcanum	10	1.69616	1.30237
06_S. arcanum	10	2.9219	1.70936
06_S. arcanum	10	5.75252	2.39844
06_S. arcanum	10	2.18735	1.47897
06_S. arcanum	10	7.2712	2.69652
06_S. arcanum	10	4.27306	2.06714
06_S. arcanum	11	4.41789	2.10188
06_S. arcanum	11	4.65004	2.1564
06_S. arcanum	11	4.00786	2.00196
06_S. arcanum	12	3.20788	1.79106
06_S. arcanum	12	3.08162	1.75545
06_S. arcanum	12	2.19692	1.4822
06_S. arcanum	12	2.68907	1.63984
06_S. arcanum	12	4.68213	2.16382
06_S. arcanum	12	5.50661	2.34662
06_S. arcanum	13	2.94596	1.71638
06_S. arcanum	13	6.63886	2.5766
06_S. arcanum	13	1.75655	1.32535
06_S. arcanum	13	4.61546	2.14836
06_S. arcanum	14	2.18271	1.4774
06_S. arcanum	14	1.42932	1.19554
06_S. arcanum	16	6.0527	2.46022
06_S. arcanum	19	2.43179	1.55942
06_S. arcanum	19	2.87012	1.69414
06_S. arcanum	19	2.97929	1.72606
06_S. arcanum	20	2.4199	1.5556
06_S. arcanum	20	3.6384	1.90746
06_S. arcanum	20	3.04664	1.74546
06_S. arcanum	20	2.81109	1.67663
06_S. arcanum	21	2.23914	1.49637
06_S. arcanum	21	2.80781	1.67565
06_S. arcanum	21	3.47212	1.86336
06_S. arcanum	21	3.01891	1.7375
06_S. arcanum	21	2.87504	1.69559
07_S. galapagense	2	4.32717	2.08018
07_S. galapagense	2	7.83398	2.79893
07_S. galapagense	2	4.29779	2.07311
07_S. galapagense	2	1.19212	1.09184
07_S. galapagense	2	2.04117	1.42869
07_S. galapagense	2	0.615531	0.784558
07_S. galapagense	4	6.25412	2.50082
07_S. galapagense	4	1.07995	1.03921
07_S. galapagense	4	6.82687	2.61283
07_S. galapagense	4	2.19788	1.48252
07_S. galapagense	4	1.10372	1.05058
07_S. galapagense	5	5.62082	2.37083
07_S. galapagense	5	9.93882	3.15259
07_S. galapagense	5	5.7129	2.39017
07_S. galapagense	5	5.04219	2.24548
07_S. galapagense	5	1.53781	1.24008
07_S. galapagense	5	1.44941	1.20391
07_S. galapagense	5	0.713497	0.844688
07_S. galapagense	6	9.83649	3.13632
07_S. galapagense	6	3.53347	1.87975
07_S. galapagense	6	2.69796	1.64255
07_S. galapagense	6	0.509641	0.713891
07_S. galapagense	6	1.89606	1.37697
07_S. galapagense	6	1.17067	1.08198
07_S. galapagense	6	2.19884	1.48285
07_S. galapagense	7	8.2555	2.87324
07_S. galapagense	7	5.9561	2.44051
07_S. galapagense	7	9.46115	3.0759
07_S. galapagense	7	7.48258	2.73543
07_S. galapagense	7	7.50692	2.73987
07_S. galapagense	7	1.681	1.29653
07_S. galapagense	7	3.65849	1.91272
07_S. galapagense	8	4.93274	2.22098
07_S. galapagense	8	4.29123	2.07153
07_S. galapagense	8	2.75398	1.65951
07_S. galapagense	8	0.957253	0.978393
07_S. galapagense	9	5.50305	2.34586
07_S. galapagense	9	3.69443	1.92209
07_S. galapagense	9	4.59826	2.14435
07_S. galapagense	9	1.45897	1.20788
07_S. galapagense	9	1.05754	1.02837
07_S. galapagense	9	1.84919	1.35985
07_S. galapagense	9	0.830593	0.911369
07_S. galapagense	11	5.44181	2.33277
07_S. galapagense	11	0.992229	0.996107
07_S. galapagense	12	6.51605	2.55265
07_S. galapagense	12	1.74302	1.32024
07_S. galapagense	12	0.926918	0.962766
07_S. galapagense	12	3.1274	1.76845
07_S. galapagense	12	1.48602	1.21903
07_S. galapagense	13	8.04321	2.83606
07_S. galapagense	13	6.89314	2.62548
07_S. galapagense	13	4.59129	2.14273
07_S. galapagense	13	3.15281	1.77562
07_S. galapagense	13	1.74331	1.32034
07_S. galapagense	13	1.03445	1.01708
07_S. galapagense	13	0.324914	0.570012
08_S. cheesmaniae	2	6.10233	2.47029
08_S. cheesmaniae	2	5.82479	2.41346
08_S. cheesmaniae	2	1.34816	1.1611
08_S. cheesmaniae	2	3.53443	1.88001
08_S. cheesmaniae	2	3.45899	1.85984
08_S. cheesmaniae	2	0.886339	0.941456
08_S. cheesmaniae	2	0.701612	0.837623
08_S. cheesmaniae	2	0.651469	0.807136
08_S. cheesmaniae	3	4.57788	2.1396
08_S. cheesmaniae	3	5.55851	2.35765
08_S. cheesmaniae	3	1.19937	1.09516
08_S. cheesmaniae	3	1.45501	1.20624
08_S. cheesmaniae	4	6.57519	2.56421
08_S. cheesmaniae	4	2.78704	1.66944
08_S. cheesmaniae	4	3.80428	1.95046
08_S. cheesmaniae	4	3.55956	1.88668
08_S. cheesmaniae	4	1.51472	1.23074
08_S. cheesmaniae	5	6.40811	2.53143
08_S. cheesmaniae	5	5.04763	2.24669
08_S. cheesmaniae	5	1.24855	1.11739
08_S. cheesmaniae	5	1.1872	1.08959
08_S. cheesmaniae	5	5.53106	2.35182
08_S. cheesmaniae	5	2.64249	1.62557
08_S. cheesmaniae	6	4.72096	2.17278
08_S. cheesmaniae	7	7.09111	2.66291
08_S. cheesmaniae	7	2.81109	1.67663
08_S. cheesmaniae	7	2.4083	1.55187
08_S. cheesmaniae	8	1.54177	1.24168
08_S. cheesmaniae	8	2.19884	1.48285
08_S. cheesmaniae	9	3.45532	1.85885
08_S. cheesmaniae	9	6.41712	2.5332
08_S. cheesmaniae	9	1.5639	1.25056
08_S. cheesmaniae	12	5.46739	2.33824
08_S. cheesmaniae	14	5.92304	2.43373
08_S. cheesmaniae	14	5.63542	2.37391
08_S. cheesmaniae	14	3.60931	1.89982
08_S. cheesmaniae	14	2.28724	1.51236
08_S. cheesmaniae	14	1.3013	1.14074
08_S. cheesmaniae	14	2.20444	1.48474
09_S. pimpinelifollium	1	3.47812	1.86497
09_S. pimpinelifollium	1	1.21754	1.10342
09_S. pimpinelifollium	1	9.55256	3.09072
09_S. pimpinelifollium	1	6.5465	2.55861
09_S. pimpinelifollium	1	3.41213	1.8472
09_S. pimpinelifollium	1	8.88852	2.98136
09_S. pimpinelifollium	1	9.82201	3.13401
09_S. pimpinelifollium	1	6.44689	2.53907
09_S. pimpinelifollium	1	6.49375	2.54828
09_S. pimpinelifollium	1	10.1438	3.18493
09_S. pimpinelifollium	1	3.70235	1.92415
09_S. pimpinelifollium	1	7.64874	2.76564
09_S. pimpinelifollium	1	1.8522	1.36095
09_S. pimpinelifollium	1	4.45054	2.10963
09_S. pimpinelifollium	1	4.35246	2.08626
09_S. pimpinelifollium	1	2.41951	1.55548
09_S. pimpinelifollium	1	2.04909	1.43146
09_S. pimpinelifollium	2	2.41554	1.5542
09_S. pimpinelifollium	2	1.38806	1.17816
09_S. pimpinelifollium	2	8.0448	2.83634
09_S. pimpinelifollium	2	5.35205	2.31345
09_S. pimpinelifollium	2	3.70275	1.92425
09_S. pimpinelifollium	2	2.73922	1.65506
09_S. pimpinelifollium	2	1.8235	1.35037
09_S. pimpinelifollium	2	5.75648	2.39927
09_S. pimpinelifollium	2	10.7843	3.28395
09_S. pimpinelifollium	2	4.25557	2.0629
09_S. pimpinelifollium	2	2.83582	1.68399
09_S. pimpinelifollium	2	3.37676	1.8376
09_S. pimpinelifollium	2	3.97452	1.99362
09_S. pimpinelifollium	3	3.64565	1.90936
09_S. pimpinelifollium	3	2.75863	1.66091
09_S. pimpinelifollium	3	2.76655	1.66329
09_S. pimpinelifollium	3	1.73838	1.31848
09_S. pimpinelifollium	3	6.08892	2.46757
09_S. pimpinelifollium	3	3.24025	1.80007
09_S. pimpinelifollium	3	6.60853	2.57071
09_S. pimpinelifollium	3	2.6537	1.62902
09_S. pimpinelifollium	3	4.21143	2.05218
09_S. pimpinelifollium	3	2.28328	1.51105
09_S. pimpinelifollium	3	5.02374	2.24137
09_S. pimpinelifollium	3	4.3914	2.09557
09_S. pimpinelifollium	3	1.46129	1.20884
09_S. pimpinelifollium	4	2.98693	1.72827
09_S. pimpinelifollium	4	1.75847	1.32607
09_S. pimpinelifollium	4	10.245	3.20078
09_S. pimpinelifollium	4	11.6159	3.4082
09_S. pimpinelifollium	4	1.94088	1.39315
09_S. pimpinelifollium	4	6.69245	2.58698
09_S. pimpinelifollium	4	7.01063	2.64776
09_S. pimpinelifollium	4	4.97127	2.22964
09_S. pimpinelifollium	4	2.39613	1.54794
09_S. pimpinelifollium	4	1.39038	1.17914
09_S. pimpinelifollium	4	2.53168	1.59112
09_S. pimpinelifollium	4	3.05977	1.74922
09_S. pimpinelifollium	4	1.49791	1.22389
09_S. pimpinelifollium	4	1.21289	1.10131
09_S. pimpinelifollium	5	3.18451	1.78452
09_S. pimpinelifollium	5	8.5777	2.92877
09_S. pimpinelifollium	5	4.46107	2.11212
09_S. pimpinelifollium	5	5.86565	2.42191
09_S. pimpinelifollium	5	9.75109	3.12267
09_S. pimpinelifollium	5	7.83098	2.79839
09_S. pimpinelifollium	5	6.45085	2.53985
09_S. pimpinelifollium	5	6.64831	2.57843
09_S. pimpinelifollium	5	3.97412	1.99352
09_S. pimpinelifollium	5	1.43984	1.19993
09_S. pimpinelifollium	5	4.81892	2.1952
09_S. pimpinelifollium	5	1.86572	1.36591
09_S. pimpinelifollium	6	2.46241	1.56921
09_S. pimpinelifollium	6	4.79787	2.1904
09_S. pimpinelifollium	6	7.9053	2.81164
09_S. pimpinelifollium	6	7.77564	2.78848
09_S. pimpinelifollium	6	4.89023	2.21139
09_S. pimpinelifollium	6	7.07555	2.65999
09_S. pimpinelifollium	6	4.88887	2.21108
09_S. pimpinelifollium	6	1.86572	1.36591
09_S. pimpinelifollium	6	4.41981	2.10233
09_S. pimpinelifollium	6	4.13248	2.03285
09_S. pimpinelifollium	6	5.2795	2.29772
09_S. pimpinelifollium	6	6.01869	2.4533
09_S. pimpinelifollium	6	5.70894	2.38934
09_S. pimpinelifollium	6	2.29121	1.51367
09_S. pimpinelifollium	6	3.20267	1.7896
09_S. pimpinelifollium	6	1.74891	1.32246
09_S. pimpinelifollium	6	2.51487	1.58583
09_S. pimpinelifollium	6	1.47714	1.21538
09_S. pimpinelifollium	7	4.6797	2.16326
09_S. pimpinelifollium	7	5.14808	2.26894
09_S. pimpinelifollium	7	5.62026	2.37071
09_S. pimpinelifollium	7	5.02318	2.24124
09_S. pimpinelifollium	7	3.01795	1.73722
09_S. pimpinelifollium	7	4.32184	2.0789
09_S. pimpinelifollium	7	2.83718	1.68439
09_S. pimpinelifollium	7	2.17739	1.4756
09_S. pimpinelifollium	7	5.06364	2.25025
09_S. pimpinelifollium	7	1.46129	1.20884
09_S. pimpinelifollium	7	2.52047	1.5876
09_S. pimpinelifollium	7	1.61568	1.2711
09_S. pimpinelifollium	7	1.92639	1.38795
09_S. pimpinelifollium	8	2.537	1.5928
09_S. pimpinelifollium	8	8.58574	2.93014
09_S. pimpinelifollium	8	6.35752	2.52141
09_S. pimpinelifollium	8	8.76186	2.96004
09_S. pimpinelifollium	8	9.63003	3.10323
09_S. pimpinelifollium	8	6.99411	2.64464
09_S. pimpinelifollium	8	9.40569	3.06687
09_S. pimpinelifollium	8	5.71935	2.39152
09_S. pimpinelifollium	8	5.04847	2.24688
09_S. pimpinelifollium	8	6.69761	2.58797
09_S. pimpinelifollium	8	1.74891	1.32246
09_S. pimpinelifollium	8	3.53375	1.87983
09_S. pimpinelifollium	8	1.36825	1.16972
09_S. pimpinelifollium	8	0.573311	0.757173
09_S. pimpinelifollium	9	2.32154	1.52366
09_S. pimpinelifollium	9	9.99564	3.16159
09_S. pimpinelifollium	9	8.53163	2.9209
09_S. pimpinelifollium	9	4.4798	2.11655
09_S. pimpinelifollium	9	6.65442	2.57962
09_S. pimpinelifollium	9	7.28733	2.69951
09_S. pimpinelifollium	9	6.43336	2.53641
09_S. pimpinelifollium	9	3.87395	1.96824
09_S. pimpinelifollium	9	3.19503	1.78747
09_S. pimpinelifollium	9	7.457	2.73075
09_S. pimpinelifollium	9	5.16761	2.27324
09_S. pimpinelifollium	9	1.89866	1.37792
09_S. pimpinelifollium	9	4.20215	2.04991
09_S. pimpinelifollium	9	4.04776	2.0119
09_S. pimpinelifollium	9	3.56709	1.88867
09_S. pimpinelifollium	9	3.2076	1.79098
09_S. pimpinelifollium	9	0.821028	0.906106
09_S. pimpinelifollium	9	1.36565	1.16861
09_S. pimpinelifollium	10	4.55343	2.13388
09_S. pimpinelifollium	10	3.87491	1.96848
09_S. pimpinelifollium	10	4.49605	2.12039
09_S. pimpinelifollium	10	3.1617	1.77812
09_S. pimpinelifollium	10	4.96171	2.22749
09_S. pimpinelifollium	10	7.4853	2.73593
09_S. pimpinelifollium	10	7.26904	2.69612
09_S. pimpinelifollium	10	5.26501	2.29456
09_S. pimpinelifollium	10	9.55612	3.0913
09_S. pimpinelifollium	10	0.774847	0.880254
09_S. pimpinelifollium	10	4.5544	2.1341
09_S. pimpinelifollium	10	4.39932	2.09746
09_S. pimpinelifollium	11	0.65543	0.809586
09_S. pimpinelifollium	11	5.64199	2.37529
09_S. pimpinelifollium	11	6.17076	2.4841
09_S. pimpinelifollium	11	8.08498	2.84341
09_S. pimpinelifollium	11	11.902	3.44993
09_S. pimpinelifollium	11	9.43942	3.07236
09_S. pimpinelifollium	11	5.22907	2.28672
09_S. pimpinelifollium	11	6.38242	2.52635
09_S. pimpinelifollium	11	1.54873	1.24448
09_S. pimpinelifollium	11	4.7226	2.17315
09_S. pimpinelifollium	11	5.85349	2.4194
09_S. pimpinelifollium	11	2.65738	1.63015
09_S. pimpinelifollium	11	5.63367	2.37353
09_S. pimpinelifollium	11	1.59355	1.26236
09_S. pimpinelifollium	11	4.54647	2.13225
09_S. pimpinelifollium	11	1.04798	1.02371
09_S. pimpinelifollium	11	1.06478	1.03188
09_S. pimpinelifollium	13	2.90606	1.70472
09_S. pimpinelifollium	13	4.78502	2.18747
09_S. pimpinelifollium	13	10.8032	3.28682
09_S. pimpinelifollium	13	7.58179	2.75351
09_S. pimpinelifollium	13	3.0047	1.73341
09_S. pimpinelifollium	13	8.11848	2.8493
09_S. pimpinelifollium	13	11.1614	3.34087
09_S. pimpinelifollium	13	9.67894	3.1111
09_S. pimpinelifollium	13	5.94449	2.43813
09_S. pimpinelifollium	13	3.91221	1.97793
09_S. pimpinelifollium	13	4.63555	2.15303
09_S. pimpinelifollium	13	4.07153	2.0178
09_S. pimpinelifollium	13	2.52347	1.58854
09_S. pimpinelifollium	13	3.24586	1.80163
09_S. pimpinelifollium	13	1.12681	1.06151
09_S. pimpinelifollium	13	1.12517	1.06074
09_S. pimpinelifollium	14	4.11675	2.02898
09_S. pimpinelifollium	14	4.45847	2.11151
09_S. pimpinelifollium	14	2.31101	1.5202
09_S. pimpinelifollium	14	1.61829	1.27212
09_S. pimpinelifollium	14	1.49955	1.22456
09_S. pimpinelifollium	14	3.30392	1.81767
09_S. pimpinelifollium	14	5.15176	2.26975
09_S. pimpinelifollium	14	6.48367	2.54631
09_S. pimpinelifollium	14	4.94926	2.22469
09_S. pimpinelifollium	14	9.94867	3.15415
09_S. pimpinelifollium	14	6.60552	2.57012
09_S. pimpinelifollium	14	8.27056	2.87586
09_S. pimpinelifollium	14	7.81242	2.79507
09_S. pimpinelifollium	14	4.67149	2.16136
09_S. pimpinelifollium	14	3.87848	1.96938
09_S. pimpinelifollium	14	2.81369	1.67741
09_S. pimpinelifollium	14	1.97818	1.40648
09_S. pimpinelifollium	18	2.97041	1.72349
09_S. pimpinelifollium	18	6.72302	2.59288
09_S. pimpinelifollium	18	11.7014	3.42073
09_S. pimpinelifollium	18	4.79759	2.19034
09_S. pimpinelifollium	18	3.8555	1.96354
09_S. pimpinelifollium	18	10.053	3.17065
09_S. pimpinelifollium	18	5.30327	2.30288
09_S. pimpinelifollium	18	6.93236	2.63294
09_S. pimpinelifollium	18	9.32714	3.05404
09_S. pimpinelifollium	18	5.03178	2.24316
09_S. pimpinelifollium	18	3.61599	1.90158
09_S. pimpinelifollium	18	4.11199	2.0278
09_S. pimpinelifollium	18	4.77274	2.18466
09_S. pimpinelifollium	18	2.69563	1.64184
09_S. pimpinelifollium	18	4.68898	2.16541
09_S. pimpinelifollium	18	0.868851	0.932122
09_S. pimpinelifollium	18	1.43656	1.19857
09_S. pimpinelifollium	19	3.77763	1.94361
09_S. pimpinelifollium	19	7.15082	2.6741
09_S. pimpinelifollium	19	5.56191	2.35837
09_S. pimpinelifollium	19	2.8395	1.68508
09_S. pimpinelifollium	19	1.93596	1.39139
09_S. pimpinelifollium	19	2.56966	1.60301
09_S. pimpinelifollium	19	8.35879	2.89116
09_S. pimpinelifollium	19	1.39598	1.18152
09_S. pimpinelifollium	19	8.95327	2.9922
09_S. pimpinelifollium	19	7.63465	2.76309
09_S. pimpinelifollium	19	7.50511	2.73955
09_S. pimpinelifollium	19	1.36565	1.16861
09_S. pimpinelifollium	19	0.699971	0.836643
09_S. pimpinelifollium	19	7.4398	2.7276
09_S. pimpinelifollium	19	3.78379	1.9452
09_S. pimpinelifollium	19	3.13861	1.77161
09_S. pimpinelifollium	19	1.2726	1.1281
09_S. pimpinelifollium	19	0.532732	0.729885
09_S. pimpinelifollium	19	0.33844	0.581756
09_S. pimpinelifollium	20	3.24886	1.80246
09_S. pimpinelifollium	20	10.5531	3.24855
09_S. pimpinelifollium	20	5.33716	2.31023
09_S. pimpinelifollium	20	3.86891	1.96696
09_S. pimpinelifollium	20	9.28379	3.04693
09_S. pimpinelifollium	20	7.49599	2.73788
09_S. pimpinelifollium	20	7.16135	2.67607
09_S. pimpinelifollium	20	6.35096	2.52011
09_S. pimpinelifollium	20	1.88185	1.37181
09_S. pimpinelifollium	20	7.31874	2.70532
09_S. pimpinelifollium	20	7.46385	2.732
09_S. pimpinelifollium	20	5.21187	2.28295
09_S. pimpinelifollium	20	2.27604	1.50865
09_S. pimpinelifollium	20	2.72569	1.65097
09_S. pimpinelifollium	20	4.30696	2.07532
09_S. pimpinelifollium	20	0.342402	0.585151
09_S. pimpinelifollium	20	0.426842	0.653331
09_S. pimpinelifollium	21	7.37941	2.71651
09_S. pimpinelifollium	21	9.4375	3.07205
09_S. pimpinelifollium	21	10.0537	3.17076
09_S. pimpinelifollium	21	1.12913	1.06261
09_S. pimpinelifollium	21	8.84234	2.97361
09_S. pimpinelifollium	21	7.0966	2.66394
09_S. pimpinelifollium	21	5.54923	2.35568
09_S. pimpinelifollium	21	8.17899	2.85989
09_S. pimpinelifollium	21	4.79199	2.18906
09_S. pimpinelifollium	21	4.2348	2.05786
09_S. pimpinelifollium	21	1.21357	1.10162
09_S. pimpinelifollium	21	6.67944	2.58446
09_S. pimpinelifollium	21	2.33903	1.52939
09_S. pimpinelifollium	21	0.653789	0.808572
09_S. pimpinelifollium	21	0.580555	0.761942
09_S. pimpinelifollium	22	2.90906	1.7056
09_S. pimpinelifollium	22	9.79756	3.1301
09_S. pimpinelifollium	22	2.20048	1.4834
09_S. pimpinelifollium	22	5.71919	2.39148
09_S. pimpinelifollium	22	1.85548	1.36216
09_S. pimpinelifollium	22	8.67951	2.9461
09_S. pimpinelifollium	22	1.58795	1.26014
09_S. pimpinelifollium	22	3.38796	1.84064
09_S. pimpinelifollium	22	8.54165	2.92261
09_S. pimpinelifollium	22	9.78816	3.1286
09_S. pimpinelifollium	22	8.44951	2.9068
09_S. pimpinelifollium	22	1.09184	1.04491
09_S. pimpinelifollium	22	8.71036	2.95133
09_S. pimpinelifollium	22	5.94641	2.43853
09_S. pimpinelifollium	22	7.52152	2.74254
09_S. pimpinelifollium	22	2.55149	1.59734
09_S. pimpinelifollium	22	7.2622	2.69485
09_S. pimpinelifollium	22	6.20234	2.49045
09_S. pimpinelifollium	22	3.21512	1.79308
09_S. pimpinelifollium	22	1.50583	1.22712
09_S. pimpinelifollium	22	1.50351	1.22618
10_"Ailsa Craig"	1	1.03049	1.01513
10_"Ailsa Craig"	1	1.44216	1.2009
10_"Ailsa Craig"	1	3.71056	1.92628
10_"Ailsa Craig"	1	2.1659	1.4717
10_"Ailsa Craig"	1	5.74092	2.39602
10_"Ailsa Craig"	1	6.43036	2.53582
10_"Ailsa Craig"	1	5.41396	2.32679
10_"Ailsa Craig"	1	6.83003	2.61343
10_"Ailsa Craig"	1	5.15188	2.26977
10_"Ailsa Craig"	1	5.46479	2.33769
10_"Ailsa Craig"	1	2.66366	1.63207
10_"Ailsa Craig"	1	4.85922	2.20436
10_"Ailsa Craig"	1	3.11195	1.76407
10_"Ailsa Craig"	1	3.34218	1.82816
10_"Ailsa Craig"	2	8.26111	2.87421
10_"Ailsa Craig"	2	8.5837	2.9298
10_"Ailsa Craig"	2	7.92759	2.8156
10_"Ailsa Craig"	2	11.6418	3.41201
10_"Ailsa Craig"	2	10.325	3.21325
10_"Ailsa Craig"	2	7.75899	2.7855
10_"Ailsa Craig"	2	7.23034	2.68893
10_"Ailsa Craig"	2	1.9089	1.38163
10_"Ailsa Craig"	2	8.1178	2.84918
10_"Ailsa Craig"	2	7.95832	2.82105
10_"Ailsa Craig"	2	1.47318	1.21375
10_"Ailsa Craig"	2	1.39762	1.18221
10_"Ailsa Craig"	2	6.3462	2.51917
10_"Ailsa Craig"	2	2.26551	1.50516
10_"Ailsa Craig"	2	1.07667	1.03763
10_"Ailsa Craig"	2	0.966818	0.983269
10_"Ailsa Craig"	3	7.7393	2.78196
10_"Ailsa Craig"	3	6.39499	2.52883
10_"Ailsa Craig"	3	12.1525	3.48605
10_"Ailsa Craig"	3	3.55396	1.8852
10_"Ailsa Craig"	3	1.33299	1.15455
10_"Ailsa Craig"	3	9.33614	3.05551
10_"Ailsa Craig"	3	12.617	3.55204
10_"Ailsa Craig"	3	9.5165	3.08488
10_"Ailsa Craig"	3	1.33463	1.15526
10_"Ailsa Craig"	3	6.35305	2.52053
10_"Ailsa Craig"	3	2.20252	1.48409
10_"Ailsa Craig"	3	1.28285	1.13263
10_"Ailsa Craig"	3	1.75191	1.3236
10_"Ailsa Craig"	4	2.50859	1.58385
10_"Ailsa Craig"	4	7.84479	2.80086
10_"Ailsa Craig"	4	3.57309	1.89026
10_"Ailsa Craig"	4	4.4429	2.10782
10_"Ailsa Craig"	4	5.05475	2.24828
10_"Ailsa Craig"	4	2.25363	1.50121
10_"Ailsa Craig"	4	6.74311	2.59675
10_"Ailsa Craig"	4	6.99615	2.64502
10_"Ailsa Craig"	5	9.7735	3.12626
10_"Ailsa Craig"	5	2.90481	1.70435
10_"Ailsa Craig"	5	1.43656	1.19857
10_"Ailsa Craig"	5	5.20366	2.28115
10_"Ailsa Craig"	5	5.64827	2.37661
10_"Ailsa Craig"	5	7.14262	2.67257
10_"Ailsa Craig"	5	4.97111	2.2296
10_"Ailsa Craig"	5	2.52608	1.58936
10_"Ailsa Craig"	5	6.36381	2.52266
10_"Ailsa Craig"	5	4.07769	2.01933
10_"Ailsa Craig"	5	4.53651	2.12991
10_"Ailsa Craig"	5	3.13	1.76918
10_"Ailsa Craig"	5	0.963536	0.981599
10_"Ailsa Craig"	5	2.36676	1.53843
10_"Ailsa Craig"	5	1.42631	1.19428
10_"Ailsa Craig"	6	3.94951	1.98734
10_"Ailsa Craig"	6	8.17915	2.85992
10_"Ailsa Craig"	6	3.22112	1.79475
10_"Ailsa Craig"	6	9.18067	3.02996
10_"Ailsa Craig"	6	7.01488	2.64856
10_"Ailsa Craig"	6	9.98228	3.15948
10_"Ailsa Craig"	6	8.92446	2.98738
10_"Ailsa Craig"	6	6.57671	2.56451
10_"Ailsa Craig"	6	8.41714	2.90123
10_"Ailsa Craig"	6	4.16417	2.04063
10_"Ailsa Craig"	6	5.34565	2.31207
10_"Ailsa Craig"	6	4.51914	2.12583
10_"Ailsa Craig"	6	1.79809	1.34093
10_"Ailsa Craig"	6	3.17726	1.78249
10_"Ailsa Craig"	6	2.01944	1.42107
10_"Ailsa Craig"	7	1.45569	1.20652
10_"Ailsa Craig"	7	1.90494	1.3802
10_"Ailsa Craig"	7	8.3748	2.89393
10_"Ailsa Craig"	7	2.25198	1.50066
10_"Ailsa Craig"	7	9.12668	3.02104
10_"Ailsa Craig"	7	5.84409	2.41745
10_"Ailsa Craig"	7	6.86377	2.61988
10_"Ailsa Craig"	7	3.31145	1.81974
10_"Ailsa Craig"	7	6.95873	2.63794
10_"Ailsa Craig"	7	2.67979	1.63701
10_"Ailsa Craig"	7	6.99699	2.64518
10_"Ailsa Craig"	7	2.0689	1.43837
10_"Ailsa Craig"	7	5.30943	2.30422
10_"Ailsa Craig"	7	1.36497	1.16832
10_"Ailsa Craig"	8	3.02751	1.73997
10_"Ailsa Craig"	8	5.86294	2.42135
10_"Ailsa Craig"	8	9.51979	3.08541
10_"Ailsa Craig"	8	6.28049	2.50609
10_"Ailsa Craig"	8	2.95388	1.71869
10_"Ailsa Craig"	8	1.12053	1.05855
10_"Ailsa Craig"	8	5.67125	2.38144
10_"Ailsa Craig"	8	7.80738	2.79417
10_"Ailsa Craig"	8	5.94874	2.439
10_"Ailsa Craig"	8	2.83158	1.68273
10_"Ailsa Craig"	8	8.62864	2.93745
10_"Ailsa Craig"	8	2.90181	1.70347
10_"Ailsa Craig"	8	3.10239	1.76136
10_"Ailsa Craig"	9	4.29083	2.07143
10_"Ailsa Craig"	9	4.23701	2.0584
10_"Ailsa Craig"	9	8.59955	2.9325
10_"Ailsa Craig"	9	1.15783	1.07602
10_"Ailsa Craig"	9	3.35243	1.83096
10_"Ailsa Craig"	9	9.89824	3.14615
10_"Ailsa Craig"	9	5.4018	2.32418
10_"Ailsa Craig"	9	5.35833	2.31481
10_"Ailsa Craig"	10	8.17939	2.85996
10_"Ailsa Craig"	10	10.3825	3.22218
10_"Ailsa Craig"	10	8.45976	2.90857
10_"Ailsa Craig"	10	9.88319	3.14375
10_"Ailsa Craig"	10	6.61073	2.57113
10_"Ailsa Craig"	10	6.13771	2.47744
10_"Ailsa Craig"	10	3.87219	1.96779
10_"Ailsa Craig"	10	4.79351	2.18941
10_"Ailsa Craig"	10	5.95298	2.43987
10_"Ailsa Craig"	10	4.62955	2.15164
10_"Ailsa Craig"	10	4.66781	2.16051
10_"Ailsa Craig"	11	2.16783	1.47235
10_"Ailsa Craig"	11	9.25413	3.04206
10_"Ailsa Craig"	11	8.92758	2.98791
10_"Ailsa Craig"	11	6.35316	2.52055
10_"Ailsa Craig"	11	8.49422	2.91448
10_"Ailsa Craig"	11	12.364	3.51625
10_"Ailsa Craig"	11	11.7274	3.42453
10_"Ailsa Craig"	11	7.39718	2.71978
10_"Ailsa Craig"	11	7.59888	2.75661
10_"Ailsa Craig"	11	6.73315	2.59483
10_"Ailsa Craig"	11	7.65406	2.7666
10_"Ailsa Craig"	11	3.18615	1.78498
10_"Ailsa Craig"	11	1.72486	1.31334
10_"Ailsa Craig"	13	6.06759	2.46325
10_"Ailsa Craig"	13	12.6213	3.55265
10_"Ailsa Craig"	13	9.70632	3.1155
10_"Ailsa Craig"	13	5.65359	2.37773
10_"Ailsa Craig"	13	8.83719	2.97274
10_"Ailsa Craig"	13	7.46821	2.7328
10_"Ailsa Craig"	13	8.98598	2.99766
10_"Ailsa Craig"	13	3.07233	1.75281
10_"Ailsa Craig"	13	5.80923	2.41023
10_"Ailsa Craig"	13	7.87405	2.80607
10_"Ailsa Craig"	13	7.59996	2.7568
10_"Ailsa Craig"	13	4.62039	2.14951
10_"Ailsa Craig"	13	2.2002	1.48331
10_"Ailsa Craig"	13	3.05977	1.74922
10_"Ailsa Craig"	13	1.42071	1.19194
10_"Ailsa Craig"	14	4.91825	2.21771
10_"Ailsa Craig"	14	2.2513	1.50043
10_"Ailsa Craig"	14	7.52192	2.74261
10_"Ailsa Craig"	14	8.45376	2.90753
10_"Ailsa Craig"	14	8.08787	2.84392
10_"Ailsa Craig"	14	13.0776	3.6163
10_"Ailsa Craig"	14	11.4441	3.38292
10_"Ailsa Craig"	14	8.28024	2.87754
10_"Ailsa Craig"	14	5.31872	2.30623
10_"Ailsa Craig"	14	9.93463	3.15192
10_"Ailsa Craig"	14	6.17664	2.48529
10_"Ailsa Craig"	14	5.07949	2.25377
10_"Ailsa Craig"	14	3.07698	1.75413
10_"Ailsa Craig"	14	4.72396	2.17347
10_"Ailsa Craig"	14	2.78268	1.66814
10_"Ailsa Craig"	15	7.15874	2.67558
10_"Ailsa Craig"	15	4.58541	2.14136
10_"Ailsa Craig"	15	1.63085	1.27705
10_"Ailsa Craig"	15	8.69287	2.94837
10_"Ailsa Craig"	15	11.1925	3.34551
10_"Ailsa Craig"	15	9.62279	3.10206
10_"Ailsa Craig"	15	8.32494	2.8853
10_"Ailsa Craig"	15	6.62505	2.57392
10_"Ailsa Craig"	15	4.71003	2.17026
10_"Ailsa Craig"	15	5.75376	2.3987
10_"Ailsa Craig"	15	1.59655	1.26355
10_"Ailsa Craig"	15	1.30034	1.14032
10_"Ailsa Craig"	16	9.36307	3.05991
10_"Ailsa Craig"	16	11.7988	3.43494
10_"Ailsa Craig"	16	12.2225	3.49607
10_"Ailsa Craig"	16	12.9852	3.6035
10_"Ailsa Craig"	16	11.3224	3.36488
10_"Ailsa Craig"	16	5.36462	2.31616
10_"Ailsa Craig"	16	9.44151	3.0727
10_"Ailsa Craig"	16	4.15693	2.03885
10_"Ailsa Craig"	16	2.95388	1.71869
10_"Ailsa Craig"	16	1.09976	1.04869
10_"Ailsa Craig"	16	0.902186	0.949835
10_"Ailsa Craig"	18	13.4242	3.6639
10_"Ailsa Craig"	18	9.48589	3.07992
10_"Ailsa Craig"	18	8.14169	2.85336
10_"Ailsa Craig"	18	10.2497	3.20151
10_"Ailsa Craig"	18	9.49001	3.08059
10_"Ailsa Craig"	18	12.7147	3.56576
10_"Ailsa Craig"	18	10.1895	3.19211
10_"Ailsa Craig"	18	4.69815	2.16752
10_"Ailsa Craig"	18	1.29897	1.13973
10_"Ailsa Craig"	18	3.98137	1.99534
10_"Ailsa Craig"	18	2.25623	1.50207
10_"Ailsa Craig"	18	1.37685	1.17339
10_"Ailsa Craig"	19	8.93675	2.98944
10_"Ailsa Craig"	19	6.10353	2.47053
10_"Ailsa Craig"	19	12.7307	3.56801
10_"Ailsa Craig"	19	10.4732	3.23623
10_"Ailsa Craig"	19	2.94075	1.71486
10_"Ailsa Craig"	19	2.55777	1.5993
10_"Ailsa Craig"	19	4.02534	2.00633
10_"Ailsa Craig"	19	4.52366	2.12689
10_"Ailsa Craig"	19	6.15644	2.48122
10_"Ailsa Craig"	19	0.851363	0.922693
10_"Ailsa Craig"	19	3.79375	1.94776
10_"Ailsa Craig"	19	1.18748	1.08972
10_"Ailsa Craig"	20	4.65728	2.15807
10_"Ailsa Craig"	20	10.5601	3.24963
10_"Ailsa Craig"	20	12.8122	3.57942
10_"Ailsa Craig"	20	6.88301	2.62355
10_"Ailsa Craig"	20	12.1872	3.49102
10_"Ailsa Craig"	20	9.8593	3.13995
10_"Ailsa Craig"	20	9.58278	3.09561
10_"Ailsa Craig"	20	6.80434	2.60851
10_"Ailsa Craig"	20	2.58346	1.60732
10_"Ailsa Craig"	20	7.69328	2.77368
10_"Ailsa Craig"	20	0.426842	0.653331
10_"Ailsa Craig"	21	9.35651	3.05884
10_"Ailsa Craig"	21	4.17838	2.04411
10_"Ailsa Craig"	21	8.11645	2.84894
10_"Ailsa Craig"	21	12.7908	3.57643
10_"Ailsa Craig"	21	7.67987	2.77126
10_"Ailsa Craig"	21	5.83628	2.41584
10_"Ailsa Craig"	21	6.53846	2.55704
10_"Ailsa Craig"	21	7.66442	2.76847
10_"Ailsa Craig"	21	7.8067	2.79405
10_"Ailsa Craig"	21	5.04162	2.24536
10_"Ailsa Craig"	21	4.07605	2.01892
10_"Ailsa Craig"	21	4.64704	2.1557
10_"Ailsa Craig"	21	2.52047	1.5876
10_"Ailsa Craig"	21	1.1014	1.04948
10_"Ailsa Craig"	21	1.27492	1.12912
10_"Ailsa Craig"	22	12.1583	3.48688
10_"Ailsa Craig"	22	11.1143	3.3338
10_"Ailsa Craig"	22	10.4189	3.22784
10_"Ailsa Craig"	22	8.12064	2.84967
10_"Ailsa Craig"	22	6.56291	2.56182
10_"Ailsa Craig"	22	3.29272	1.81458
10_"Ailsa Craig"	22	1.6094	1.26862
10_"Ailsa Craig"	22	1.19937	1.09516
10_"Ailsa Craig"	22	1.05358	1.02644
11_"Craigella"	2	6.81391	2.61035
11_"Craigella"	2	10.4026	3.2253
11_"Craigella"	2	5.55047	2.35594
11_"Craigella"	2	7.46413	2.73206
11_"Craigella"	2	5.97086	2.44354
11_"Craigella"	2	5.02114	2.24079
11_"Craigella"	2	5.65676	2.37839
11_"Craigella"	2	5.35097	2.31322
11_"Craigella"	2	2.98065	1.72646
11_"Craigella"	2	1.90958	1.38188
11_"Craigella"	2	2.40802	1.55178
11_"Craigella"	2	3.23561	1.79878
11_"Craigella"	2	2.31401	1.52119
11_"Craigella"	2	1.79905	1.34129
11_"Craigella"	2	1.40719	1.18625
11_"Craigella"	2	1.9406	1.39305
11_"Craigella"	2	0.84576	0.919652
11_"Craigella"	2	10.6224	3.2592
11_"Craigella"	2	8.8448	2.97402
11_"Craigella"	2	4.70217	2.16845
11_"Craigella"	2	5.73622	2.39504
11_"Craigella"	2	3.81678	1.95366
11_"Craigella"	2	6.48889	2.54733
11_"Craigella"	2	4.69482	2.16675
11_"Craigella"	2	7.83241	2.79864
11_"Craigella"	2	3.21951	1.7943
11_"Craigella"	2	3.23302	1.79806
11_"Craigella"	2	2.63936	1.62461
11_"Craigella"	2	2.11978	1.45595
11_"Craigella"	2	1.70647	1.30632
11_"Craigella"	2	0.919815	0.95907
11_"Craigella"	3	10.8116	3.28809
11_"Craigella"	3	9.42389	3.06984
11_"Craigella"	3	11.5666	3.40098
11_"Craigella"	3	11.1852	3.34443
11_"Craigella"	3	4.2304	2.05679
11_"Craigella"	3	7.90562	2.81169
11_"Craigella"	3	5.53421	2.35249
11_"Craigella"	3	5.96258	2.44184
11_"Craigella"	3	4.09332	2.0232
11_"Craigella"	3	4.96912	2.22915
11_"Craigella"	3	4.85607	2.20365
11_"Craigella"	3	4.67814	2.1629
11_"Craigella"	3	2.54977	1.5968
11_"Craigella"	3	1.5461	1.24342
11_"Craigella"	3	1.23078	1.1094
11_"Craigella"	3	1.87449	1.36912
11_"Craigella"	3	1.53738	1.23991
11_"Craigella"	3	1.12557	1.06093
11_"Craigella"	4	6.50619	2.55072
11_"Craigella"	4	9.85943	3.13997
11_"Craigella"	4	8.67241	2.9449
11_"Craigella"	4	8.25082	2.87242
11_"Craigella"	4	5.42464	2.32909
11_"Craigella"	4	7.67534	2.77044
11_"Craigella"	4	7.65386	2.76656
11_"Craigella"	4	4.20033	2.04947
11_"Craigella"	4	6.48621	2.5468
11_"Craigella"	4	2.48696	1.57701
11_"Craigella"	4	1.78086	1.33449
11_"Craigella"	4	1.5733	1.25431
11_"Craigella"	4	0.84181	0.917502
11_"Craigella"	6	11.4224	3.3797
11_"Craigella"	6	3.30486	1.81793
11_"Craigella"	6	10.4931	3.23931
11_"Craigella"	6	8.88446	2.98068
11_"Craigella"	6	10.6748	3.26724
11_"Craigella"	6	7.56727	2.75087
11_"Craigella"	6	8.05005	2.83726
11_"Craigella"	6	5.97173	2.44371
11_"Craigella"	6	4.43285	2.10543
11_"Craigella"	6	1.61539	1.27098
11_"Craigella"	6	3.38318	1.83934
11_"Craigella"	6	1.55407	1.24662
11_"Craigella"	8	9.4831	3.07946
11_"Craigella"	8	5.11368	2.26134
11_"Craigella"	8	3.63207	1.9058
11_"Craigella"	8	8.33711	2.8874
11_"Craigella"	8	8.12924	2.85118
11_"Craigella"	8	6.83203	2.61382
11_"Craigella"	8	5.85301	2.4193
11_"Craigella"	8	1.13789	1.06672
11_"Craigella"	8	1.45066	1.20443
11_"Craigella"	8	1.07402	1.03635
11_"Craigella"	9	8.445	2.90603
11_"Craigella"	9	3.84443	1.96072
11_"Craigella"	9	4.42097	2.10261
11_"Craigella"	9	6.03349	2.45632
11_"Craigella"	9	2.41151	1.5529
11_"Craigella"	9	1.65281	1.28561
11_"Craigella"	9	3.60742	1.89932
11_"Craigella"	9	2.56857	1.60268
11_"Craigella"	9	1.5207	1.23317
11_"Craigella"	11	6.64882	2.57853
11_"Craigella"	11	5.20687	2.28186
11_"Craigella"	11	3.3429	1.82836
11_"Craigella"	11	4.78304	2.18702
11_"Craigella"	11	3.6223	1.90323
11_"Craigella"	11	1.94304	1.39393
11_"Craigella"	11	2.16261	1.47058
11_"Craigella"	11	2.16547	1.47155
11_"Craigella"	11	0.550084	0.741676
11_"Craigella"	11	0.632447	0.795265
11_"Craigella"	12	8.82898	2.97136
11_"Craigella"	12	4.16213	2.04013
11_"Craigella"	12	7.90326	2.81127
11_"Craigella"	12	5.25697	2.29281
11_"Craigella"	12	3.83733	1.95891
11_"Craigella"	12	5.30971	2.30428
11_"Craigella"	12	4.43934	2.10697
11_"Craigella"	12	3.96852	1.99211
11_"Craigella"	12	2.74674	1.65733
11_"Craigella"	12	2.17943	1.47629
11_"Craigella"	12	1.56786	1.25214
11_"Craigella"	12	1.84127	1.35693
11_"Craigella"	12	1.88321	1.3723
11_"Craigella"	12	1.45501	1.20624
11_"Craigella"	13	4.65564	2.15769
11_"Craigella"	13	10.961	3.31074
11_"Craigella"	13	10.1815	3.19085
11_"Craigella"	13	2.16222	1.47045
11_"Craigella"	13	1.39926	1.1829
11_"Craigella"	13	7.94536	2.81875
11_"Craigella"	13	3.91277	1.97807
11_"Craigella"	13	9.56653	3.09298
11_"Craigella"	13	8.39461	2.89735
11_"Craigella"	13	5.97743	2.44488
11_"Craigella"	13	5.21051	2.28265
11_"Craigella"	13	1.39366	1.18053
11_"Craigella"	13	1.14526	1.07017
11_"Craigella"	13	3.51202	1.87404
11_"Craigella"	13	3.80881	1.95162
11_"Craigella"	13	6.71076	2.59051
11_"Craigella"	13	8.4892	2.91362
11_"Craigella"	13	5.73217	2.3942
11_"Craigella"	13	0.935442	0.967183
11_"Craigella"	13	2.92206	1.7094
11_"Craigella"	13	2.06312	1.43636
11_"Craigella"	13	2.61545	1.61724
11_"Craigella"	13	0.608852	0.78029
11_"Craigella"	13	1.73262	1.31629
11_"Craigella"	13	0.755089	0.868959
11_"Craigella"	14	6.83575	2.61453
11_"Craigella"	14	10.6052	3.25656
11_"Craigella"	14	8.69632	2.94895
11_"Craigella"	14	1.5124	1.2298
11_"Craigella"	14	6.74831	2.59775
11_"Craigella"	14	2.9618	1.72099
11_"Craigella"	14	5.27446	2.29662
11_"Craigella"	14	4.59033	2.14251
11_"Craigella"	14	4.53159	2.12875
11_"Craigella"	14	2.10948	1.4524
11_"Craigella"	14	2.82954	1.68212
11_"Craigella"	14	0.830593	0.911369
11_"Craigella"	14	9.52773	3.0867
11_"Craigella"	14	9.37789	3.06233
11_"Craigella"	14	10.5176	3.24308
11_"Craigella"	14	7.86727	2.80487
11_"Craigella"	14	6.35933	2.52177
11_"Craigella"	14	5.18988	2.27813
11_"Craigella"	14	6.02614	2.45482
11_"Craigella"	14	4.5367	2.12995
11_"Craigella"	14	2.84436	1.68652
11_"Craigella"	14	3.41337	1.84753
11_"Craigella"	14	1.62049	1.27299
11_"Craigella"	14	1.32186	1.14972
11_"Craigella"	15	1.46621	1.21087
11_"Craigella"	15	1.48834	1.21998
11_"Craigella"	15	1.59355	1.26236
11_"Craigella"	15	10.6901	3.26957
11_"Craigella"	15	3.08518	1.75647
11_"Craigella"	15	1.32275	1.15011
11_"Craigella"	15	1.68592	1.29843
11_"Craigella"	15	5.18809	2.27774
11_"Craigella"	15	1.95809	1.39932
11_"Craigella"	15	4.88059	2.20921
11_"Craigella"	15	4.18471	2.04566
11_"Craigella"	15	6.1608	2.4821
11_"Craigella"	15	5.5192	2.3493
11_"Craigella"	15	3.70105	1.92381
11_"Craigella"	15	6.14007	2.47792
11_"Craigella"	15	3.88215	1.97032
11_"Craigella"	15	4.76455	2.18279
11_"Craigella"	15	4.22829	2.05628
11_"Craigella"	15	3.12451	1.76763
11_"Craigella"	15	2.59292	1.61025
11_"Craigella"	15	2.03486	1.42649
11_"Craigella"	15	0.958289	0.978922
11_"Craigella"	16	1.73374	1.31672
11_"Craigella"	16	9.97108	3.1577
11_"Craigella"	16	4.89584	2.21265
11_"Craigella"	16	8.22749	2.86836
11_"Craigella"	16	4.39576	2.09661
11_"Craigella"	16	6.22554	2.4951
11_"Craigella"	16	2.94732	1.71677
11_"Craigella"	16	5.31668	2.30579
11_"Craigella"	16	1.59587	1.26328
11_"Craigella"	16	3.05156	1.74687
11_"Craigella"	16	2.34831	1.53242
11_"Craigella"	16	1.53849	1.24036
11_"Craigella"	16	0.996191	0.998094
11_"Craigella"	16	1.64206	1.28143
11_"Craigella"	16	0.759679	0.871596
11_"Craigella"	16	9.89765	3.14605
11_"Craigella"	16	3.52039	1.87627
11_"Craigella"	16	7.32142	2.70581
11_"Craigella"	16	2.16833	1.47253
11_"Craigella"	16	4.16833	2.04165
11_"Craigella"	16	4.76063	2.18189
11_"Craigella"	16	3.33163	1.82528
11_"Craigella"	16	2.43105	1.55918
11_"Craigella"	16	3.20507	1.79027
11_"Craigella"	16	1.49785	1.22387
11_"Craigella"	16	0.535205	0.731577
11_"Craigella"	17	7.36849	2.7145
11_"Craigella"	17	6.54446	2.55821
11_"Craigella"	17	5.52257	2.35002
11_"Craigella"	17	4.84965	2.20219
11_"Craigella"	17	4.89516	2.2125
11_"Craigella"	17	4.46599	2.11329
11_"Craigella"	17	3.58061	1.89225
11_"Craigella"	17	2.2886	1.51281
11_"Craigella"	17	1.4867	1.2193
11_"Craigella"	17	2.38249	1.54353
11_"Craigella"	17	2.01563	1.41973
11_"Craigella"	17	8.17039	2.85839
11_"Craigella"	17	5.00037	2.23615
11_"Craigella"	17	2.83895	1.68492
11_"Craigella"	17	5.08634	2.25529
11_"Craigella"	17	3.42059	1.84948
11_"Craigella"	17	5.20824	2.28216
11_"Craigella"	17	2.18801	1.47919
11_"Craigella"	17	4.7874	2.18801
11_"Craigella"	17	2.42277	1.55653
11_"Craigella"	17	1.74133	1.3196
11_"Craigella"	17	1.93401	1.39069
11_"Craigella"	18	2.24338	1.49779
11_"Craigella"	18	5.87538	2.42392
11_"Craigella"	18	9.25838	3.04276
11_"Craigella"	18	10.6428	3.26233
11_"Craigella"	18	9.21876	3.03624
11_"Craigella"	18	9.18615	3.03087
11_"Craigella"	18	7.62849	2.76197
11_"Craigella"	18	6.40415	2.53064
11_"Craigella"	18	5.17129	2.27405
11_"Craigella"	18	4.92085	2.2183
11_"Craigella"	18	3.30749	1.81865
11_"Craigella"	18	1.2271	1.10775
11_"Craigella"	18	1.48998	1.22065
11_"Craigella"	18	0.717459	0.84703
11_"Craigella"	18	9.39762	3.06555
11_"Craigella"	18	5.78566	2.40534
11_"Craigella"	18	6.92448	2.63144
11_"Craigella"	18	4.1336	2.03313
11_"Craigella"	18	4.2657	2.06536
11_"Craigella"	18	8.07003	2.84078
11_"Craigella"	18	6.80483	2.60861
11_"Craigella"	18	6.33319	2.51658
11_"Craigella"	18	5.12227	2.26324
11_"Craigella"	18	3.37882	1.83816
11_"Craigella"	18	3.53738	1.88079
11_"Craigella"	18	4.47612	2.11569
11_"Craigella"	18	3.32291	1.82289
11_"Craigella"	19	8.90974	2.98492
11_"Craigella"	19	5.78518	2.40524
11_"Craigella"	19	11.8623	3.44416
11_"Craigella"	19	5.39812	2.32338
11_"Craigella"	19	4.55632	2.13455
11_"Craigella"	19	4.31856	2.07812
11_"Craigella"	19	5.12963	2.26487
11_"Craigella"	19	1.75519	1.32484
11_"Craigella"	20	10.4454	3.23194
11_"Craigella"	20	5.35628	2.31436
11_"Craigella"	20	8.11555	2.84878
11_"Craigella"	20	2.27759	1.50917
11_"Craigella"	20	4.93482	2.22145
11_"Craigella"	20	3.13939	1.77183
11_"Craigella"	20	3.33643	1.82659
11_"Craigella"	20	4.38355	2.09369
11_"Craigella"	20	3.31974	1.82202
11_"Craigella"	20	3.04501	1.745
11_"Craigella"	20	2.34477	1.53126
11_"Craigella"	21	9.88906	3.14469
11_"Craigella"	21	4.1387	2.03438
11_"Craigella"	21	4.07919	2.0197
11_"Craigella"	21	8.47357	2.91094
11_"Craigella"	21	2.9652	1.72198
11_"Craigella"	21	2.65934	1.63075
11_"Craigella"	21	5.92137	2.43339
11_"Craigella"	21	1.51454	1.23066
11_"Craigella"	21	1.63898	1.28023
11_"Craigella"	21	2.43765	1.5613
11_"Craigella"	21	3.14194	1.77255
11_"Craigella"	22	5.69352	2.38611
11_"Craigella"	22	3.25332	1.80369
11_"Craigella"	22	4.635	2.1529
11_"Craigella"	22	3.69383	1.92193
11_"Craigella"	22	2.8857	1.69873
11_"Craigella"	22	1.74419	1.32068
11_"Craigella"	22	4.2591	2.06376
11_"Craigella"	22	4.18004	2.04451
11_"Craigella"	22	3.22897	1.79693
11_"Craigella"	22	2.41872	1.55523
11_"Craigella"	22	1.29571	1.13829
11_"Craigella"	24	4.29151	2.0716
11_"Craigella"	24	4.95815	2.22669
11_"Craigella"	24	8.33995	2.8879
11_"Craigella"	24	10.0946	3.1772
11_"Craigella"	24	5.62382	2.37146
11_"Craigella"	24	5.09081	2.25628
11_"Craigella"	24	7.91927	2.81412
11_"Craigella"	24	6.87962	2.6229
11_"Craigella"	24	5.05911	2.24925
11_"Craigella"	24	5.58749	2.36379
11_"Craigella"	24	4.8513	2.20257
11_"Craigella"	24	3.55492	1.88545
11_"Craigella"	24	3.31281	1.82011
11_"Craigella"	24	1.61336	1.27018
11_"Craigella"	24	1.01368	1.00682
11_"Craigella"	24	0.527129	0.726037
11_"Craigella"	25	3.32005	1.8221
11_"Craigella"	25	10.0375	3.16821
11_"Craigella"	25	10.6808	3.26815
11_"Craigella"	25	6.25338	2.50068
11_"Craigella"	25	3.11685	1.76546
11_"Craigella"	25	5.00218	2.23655
11_"Craigella"	25	3.905	1.97611
11_"Craigella"	25	7.18763	2.68098
11_"Craigella"	25	2.16292	1.47069
11_"Craigella"	25	5.83994	2.4166
11_"Craigella"	25	5.51484	2.34837
11_"Craigella"	25	2.63936	1.62461
11_"Craigella"	25	1.44195	1.20081
11_"Craigella"	25	1.12302	1.05972
11_"Craigella"	25	1.22281	1.10581
11_"Craigella"	25	0.930336	0.964539
11_"Craigella"	25	1.36214	1.16711
11_"Craigella"	27	1.27492	1.12912
11_"Craigella"	27	4.8651	2.2057
11_"Craigella"	27	7.84796	2.80142
11_"Craigella"	27	2.93911	1.71438
11_"Craigella"	27	5.82768	2.41406
11_"Craigella"	27	5.7558	2.39913
11_"Craigella"	27	5.01989	2.24051
11_"Craigella"	27	6.95013	2.63631
11_"Craigella"	27	2.28396	1.51128
11_"Craigella"	27	1.15551	1.07495
11_"Craigella"	27	0.796296	0.892354
11_"Craigella"	28	5.65523	2.37807
11_"Craigella"	28	6.04862	2.4594
11_"Craigella"	28	5.13563	2.26619
11_"Craigella"	28	5.17853	2.27564
11_"Craigella"	28	5.33677	2.31014
11_"Craigella"	28	3.69743	1.92287
11_"Craigella"	28	3.07494	1.75355
11_"Craigella"	28	2.22754	1.49249
11_"Craigella"	28	1.3155	1.14695
11_"Craigella"	28	9.32845	3.05425
11_"Craigella"	28	10.1642	3.18814
11_"Craigella"	28	9.18926	3.03138
11_"Craigella"	28	11.3883	3.37465
11_"Craigella"	28	10.4149	3.22722
11_"Craigella"	28	9.83689	3.13638
11_"Craigella"	28	9.54983	3.09028
11_"Craigella"	28	6.90357	2.62746
11_"Craigella"	28	4.29802	2.07317
11_"Craigella"	28	6.02253	2.45409
11_"Craigella"	28	3.74283	1.93464
11_"Craigella"	28	5.25257	2.29185
11_"Craigella"	28	1.54535	1.24312
12_"Moneymaker"	1	6.45141	2.53996
12_"Moneymaker"	1	3.44207	1.85528
12_"Moneymaker"	1	5.73435	2.39465
12_"Moneymaker"	1	6.50224	2.54995
12_"Moneymaker"	1	9.0145	3.00242
12_"Moneymaker"	1	7.35728	2.71243
12_"Moneymaker"	1	5.52353	2.35022
12_"Moneymaker"	1	5.88138	2.42516
12_"Moneymaker"	1	5.31572	2.30558
12_"Moneymaker"	1	4.79487	2.18972
12_"Moneymaker"	2	12.0722	3.47451
12_"Moneymaker"	2	12.0263	3.4679
12_"Moneymaker"	2	11.2923	3.36041
12_"Moneymaker"	2	12.6289	3.55372
12_"Moneymaker"	2	8.13909	2.85291
12_"Moneymaker"	2	8.82366	2.97046
12_"Moneymaker"	2	5.97018	2.4434
12_"Moneymaker"	2	5.17253	2.27432
12_"Moneymaker"	2	4.79719	2.19025
12_"Moneymaker"	2	4.3631	2.0888
12_"Moneymaker"	2	2.85495	1.68966
12_"Moneymaker"	2	2.29913	1.51629
12_"Moneymaker"	2	1.00344	1.00172
12_"Moneymaker"	3	12.0491	3.47119
12_"Moneymaker"	3	12.1299	3.4828
12_"Moneymaker"	3	11.2422	3.35294
12_"Moneymaker"	3	12.6098	3.55102
12_"Moneymaker"	3	8.06982	2.84074
12_"Moneymaker"	3	8.79729	2.96602
12_"Moneymaker"	3	6.09124	2.46804
12_"Moneymaker"	3	5.22267	2.28532
12_"Moneymaker"	3	4.85294	2.20294
12_"Moneymaker"	3	4.48416	2.11758
12_"Moneymaker"	3	2.87804	1.69648
12_"Moneymaker"	3	2.27604	1.50865
12_"Moneymaker"	3	1.00344	1.00172
12_"Moneymaker"	4	5.60429	2.36734
12_"Moneymaker"	4	10.2684	3.20444
12_"Moneymaker"	4	5.6558	2.37819
12_"Moneymaker"	4	8.3353	2.88709
12_"Moneymaker"	4	11.0273	3.32073
12_"Moneymaker"	4	1.07667	1.03763
12_"Moneymaker"	4	0.974741	0.98729
12_"Moneymaker"	4	4.10474	2.02602
12_"Moneymaker"	4	6.43625	2.53698
12_"Moneymaker"	4	6.64242	2.57729
12_"Moneymaker"	4	14.1652	3.76367
12_"Moneymaker"	4	12.6637	3.55861
12_"Moneymaker"	4	12.623	3.55289
12_"Moneymaker"	4	9.73009	3.11931
12_"Moneymaker"	4	1.69288	1.30111
12_"Moneymaker"	4	3.06537	1.75082
12_"Moneymaker"	4	6.41383	2.53256
12_"Moneymaker"	4	2.87708	1.6962
12_"Moneymaker"	4	2.42415	1.55697
12_"Moneymaker"	5	5.91948	2.433
12_"Moneymaker"	5	3.26459	1.80682
12_"Moneymaker"	5	3.98573	1.99643
12_"Moneymaker"	5	3.97248	1.99311
12_"Moneymaker"	5	3.27319	1.8092
12_"Moneymaker"	5	5.28906	2.2998
12_"Moneymaker"	5	2.4083	1.55187
12_"Moneymaker"	5	0.966818	0.983269
12_"Moneymaker"	6	9.14513	3.02409
12_"Moneymaker"	6	5.56355	2.35872
12_"Moneymaker"	6	8.69355	2.94848
12_"Moneymaker"	6	11.0978	3.33133
12_"Moneymaker"	6	12.3798	3.5185
12_"Moneymaker"	6	4.23933	2.05896
12_"Moneymaker"	6	10.3892	3.22323
12_"Moneymaker"	6	11.2049	3.34737
12_"Moneymaker"	6	6.92059	2.6307
12_"Moneymaker"	6	1.91915	1.38533
12_"Moneymaker"	6	3.17194	1.78099
12_"Moneymaker"	6	2.45188	1.56585
12_"Moneymaker"	6	0.898225	0.947747
12_"Moneymaker"	7	13.5397	3.67963
12_"Moneymaker"	7	14.4789	3.80511
12_"Moneymaker"	7	1.78156	1.33475
12_"Moneymaker"	7	10.7689	3.2816
12_"Moneymaker"	7	7.91899	2.81407
12_"Moneymaker"	7	11.0295	3.32106
12_"Moneymaker"	7	9.32945	3.05442
12_"Moneymaker"	7	9.09419	3.01566
12_"Moneymaker"	7	4.84597	2.20136
12_"Moneymaker"	7	5.83849	2.4163
12_"Moneymaker"	7	4.16677	2.04127
12_"Moneymaker"	8	5.10818	2.26013
12_"Moneymaker"	8	4.62395	2.15034
12_"Moneymaker"	8	2.24242	1.49747
12_"Moneymaker"	8	2.80877	1.67594
12_"Moneymaker"	8	4.94586	2.22393
12_"Moneymaker"	8	2.35063	1.53318
12_"Moneymaker"	8	2.15006	1.46631
12_"Moneymaker"	9	7.49515	2.73773
12_"Moneymaker"	9	9.08174	3.01359
12_"Moneymaker"	9	10.5269	3.24452
12_"Moneymaker"	9	10.7159	3.27351
12_"Moneymaker"	9	9.03816	3.00635
12_"Moneymaker"	9	9.37479	3.06183
12_"Moneymaker"	9	8.00303	2.82896
12_"Moneymaker"	9	5.7446	2.39679
12_"Moneymaker"	9	2.08243	1.44306
12_"Moneymaker"	9	2.34531	1.53144
12_"Moneymaker"	9	1.72718	1.31422
13_"M82"	1	5.91416	2.4319
13_"M82"	1	9.22532	3.03732
13_"M82"	1	14.4808	3.80537
13_"M82"	1	12.4914	3.53432
13_"M82"	1	6.68136	2.58483
13_"M82"	1	10.8274	3.2905
13_"M82"	1	12.4317	3.52587
13_"M82"	1	9.64016	3.10486
13_"M82"	1	10.8256	3.29023
13_"M82"	1	7.3562	2.71223
13_"M82"	1	5.42132	2.32837
13_"M82"	1	8.39161	2.89683
13_"M82"	1	8.35019	2.88967
13_"M82"	1	6.31943	2.51385
13_"M82"	1	4.80115	2.19115
13_"M82"	1	2.16851	1.47258
13_"M82"	1	1.28845	1.1351
13_"M82"	2	10.5254	3.24429
13_"M82"	2	7.23498	2.68979
13_"M82"	2	6.56534	2.56229
13_"M82"	2	11.0286	3.32094
13_"M82"	2	3.58226	1.89268
13_"M82"	2	11.0734	3.32768
13_"M82"	2	11.389	3.37475
13_"M82"	2	16.1859	4.02317
13_"M82"	2	7.98538	2.82584
13_"M82"	2	4.85022	2.20232
13_"M82"	2	3.74429	1.93502
13_"M82"	2	5.66712	2.38057
13_"M82"	3	2.34231	1.53046
13_"M82"	3	3.801	1.94962
13_"M82"	3	11.6209	3.40895
13_"M82"	3	11.5008	3.39129
13_"M82"	3	8.28024	2.87754
13_"M82"	3	13.7819	3.7124
13_"M82"	3	11.6119	3.40763
13_"M82"	3	10.184	3.19124
13_"M82"	3	8.0615	2.83928
13_"M82"	3	11.4385	3.38209
13_"M82"	3	6.82471	2.61242
13_"M82"	3	6.78057	2.60395
13_"M82"	3	3.98137	1.99534
13_"M82"	3	3.50314	1.87167
13_"M82"	3	2.07546	1.44065
13_"M82"	3	2.24174	1.49724
13_"M82"	3	2.45776	1.56773
13_"M82"	4	0.861607	0.928228
13_"M82"	4	3.09446	1.75911
13_"M82"	4	9.16126	3.02676
13_"M82"	4	7.40799	2.72176
13_"M82"	4	7.54653	2.7471
13_"M82"	4	2.53168	1.59112
13_"M82"	4	9.26386	3.04366
13_"M82"	4	7.40278	2.72081
13_"M82"	4	8.86175	2.97687
13_"M82"	4	10.384	3.22242
13_"M82"	4	8.54697	2.92352
13_"M82"	4	3.0476	1.74574
13_"M82"	4	2.3341	1.52778
13_"M82"	5	15.2729	3.90805
13_"M82"	5	2.40966	1.55231
13_"M82"	5	3.11919	1.76612
13_"M82"	5	12.0769	3.47518
13_"M82"	5	6.7915	2.60605
13_"M82"	5	3.86099	1.96494
13_"M82"	5	5.94902	2.43906
13_"M82"	5	9.61719	3.10116
13_"M82"	5	13.0162	3.6078
13_"M82"	5	8.15618	2.8559
13_"M82"	5	8.92554	2.98756
13_"M82"	5	6.08496	2.46677
13_"M82"	5	2.17807	1.47583
13_"M82"	5	1.14362	1.0694
13_"M82"	5	1.9917	1.41128
13_"M82"	6	1.64766	1.28361
13_"M82"	6	1.99006	1.4107
13_"M82"	6	1.12285	1.05965
13_"M82"	6	8.50322	2.91603
13_"M82"	6	3.15706	1.77681
13_"M82"	6	1.97653	1.40589
13_"M82"	6	8.42438	2.90248
13_"M82"	6	6.89314	2.62548
13_"M82"	6	7.80625	2.79397
13_"M82"	6	7.95232	2.81999
13_"M82"	6	4.87891	2.20883
13_"M82"	6	6.15095	2.48011
13_"M82"	6	2.40666	1.55134
13_"M82"	6	1.43028	1.19594
13_"M82"	6	0.913392	0.955715
13_"M82"	6	1.33395	1.15497
13_"M82"	6	0.736588	0.858247
13_"M82"	7	3.39193	1.84172
13_"M82"	7	9.3118	3.05152
13_"M82"	7	7.69424	2.77385
13_"M82"	7	14.6306	3.82499
13_"M82"	7	16.3263	4.04058
13_"M82"	7	11.3881	3.37463
13_"M82"	7	6.58532	2.56619
13_"M82"	7	2.82654	1.68123
13_"M82"	7	3.7641	1.94013
13_"M82"	7	3.08886	1.75752
13_"M82"	7	1.31154	1.14522
13_"M82"	7	1.96697	1.40249
13_"M82"	9	4.41393	2.10093
13_"M82"	9	6.37994	2.52585
13_"M82"	9	2.5825	1.60702
13_"M82"	9	1.99731	1.41326
13_"M82"	9	1.18092	1.0867
13_"M82"	10	2.8794	1.69688
13_"M82"	10	4.56232	2.13596
13_"M82"	10	4.89255	2.21191
13_"M82"	10	4.99612	2.2352
13_"M82"	10	5.92264	2.43365
13_"M82"	10	2.02504	1.42304
13_"M82"	10	0.852043	0.923062
13_"M82"	11	1.54669	1.24366
13_"M82"	11	1.62553	1.27496
13_"M82"	11	10.8815	3.29871
13_"M82"	11	13.1659	3.62848
13_"M82"	11	1.55133	1.24553
13_"M82"	11	8.85275	2.97536
13_"M82"	11	7.69764	2.77446
13_"M82"	11	0.834555	0.91354
13_"M82"	11	2.70684	1.64525
14_"Micro-Tom"	2	5.96557	2.44245
14_"Micro-Tom"	2	0.939052	0.969047
14_"Micro-Tom"	2	2.49928	1.58091
14_"Micro-Tom"	2	3.55301	1.88494
14_"Micro-Tom"	2	2.10309	1.4502
14_"Micro-Tom"	2	5.37371	2.31813
14_"Micro-Tom"	2	6.44804	2.5393
14_"Micro-Tom"	2	4.7587	2.18144
14_"Micro-Tom"	2	2.91876	1.70844
14_"Micro-Tom"	2	1.43037	1.19598
14_"Micro-Tom"	2	5.04109	2.24524
14_"Micro-Tom"	2	5.18297	2.27661
14_"Micro-Tom"	2	1.20177	1.09625
14_"Micro-Tom"	2	4.24827	2.06113
14_"Micro-Tom"	2	2.60418	1.61375
14_"Micro-Tom"	2	1.75907	1.3263
14_"Micro-Tom"	2	1.85526	1.36208
14_"Micro-Tom"	2	1.78703	1.3368
14_"Micro-Tom"	2	0.992405	0.996195
14_"Micro-Tom"	2	2.08025	1.44231
14_"Micro-Tom"	2	1.0432	1.02137
14_"Micro-Tom"	2	1.95611	1.39861
14_"Micro-Tom"	2	0.907489	0.952622
14_"Micro-Tom"	3	7.75995	2.78567
14_"Micro-Tom"	3	3.07116	1.75247
14_"Micro-Tom"	3	2.56135	1.60042
14_"Micro-Tom"	3	3.10421	1.76188
14_"Micro-Tom"	3	1.81062	1.34559
14_"Micro-Tom"	3	1.74749	1.32193
14_"Micro-Tom"	3	6.20799	2.49158
14_"Micro-Tom"	3	6.94248	2.63486
14_"Micro-Tom"	3	4.02478	2.00618
14_"Micro-Tom"	3	7.44568	2.72868
14_"Micro-Tom"	3	7.92604	2.81532
14_"Micro-Tom"	3	5.95007	2.43928
14_"Micro-Tom"	3	5.98811	2.44706
14_"Micro-Tom"	3	4.36581	2.08945
14_"Micro-Tom"	3	4.69856	2.16762
14_"Micro-Tom"	3	6.56496	2.56222
14_"Micro-Tom"	3	5.92349	2.43382
14_"Micro-Tom"	3	2.65318	1.62886
14_"Micro-Tom"	3	2.93874	1.71428
14_"Micro-Tom"	3	1.82295	1.35017
14_"Micro-Tom"	3	3.17637	1.78224
14_"Micro-Tom"	3	1.92965	1.38912
14_"Micro-Tom"	3	2.57112	1.60347
14_"Micro-Tom"	3	2.11903	1.45569
14_"Micro-Tom"	3	2.52829	1.59006
14_"Micro-Tom"	3	2.18832	1.4793
14_"Micro-Tom"	3	1.63102	1.27711
14_"Micro-Tom"	3	1.1651	1.0794
14_"Micro-Tom"	3	0.850526	0.92224
14_"Micro-Tom"	3	1.35523	1.16414
14_"Micro-Tom"	3	1.29646	1.13862
14_"Micro-Tom"	5	3.71879	1.92842
14_"Micro-Tom"	5	2.48951	1.57782
14_"Micro-Tom"	5	3.50551	1.8723
14_"Micro-Tom"	5	6.96427	2.63899
14_"Micro-Tom"	5	5.49561	2.34427
14_"Micro-Tom"	5	4.49959	2.12122
14_"Micro-Tom"	5	7.59795	2.75644
14_"Micro-Tom"	5	2.68294	1.63797
14_"Micro-Tom"	5	5.57598	2.36135
14_"Micro-Tom"	5	1.92274	1.38663
14_"Micro-Tom"	5	5.89672	2.42832
14_"Micro-Tom"	5	6.64371	2.57754
14_"Micro-Tom"	5	3.61794	1.90209
14_"Micro-Tom"	5	3.82475	1.9557
14_"Micro-Tom"	5	3.98991	1.99748
14_"Micro-Tom"	5	5.04215	2.24547
14_"Micro-Tom"	5	3.65641	1.91218
14_"Micro-Tom"	5	4.35859	2.08772
14_"Micro-Tom"	5	2.46666	1.57056
14_"Micro-Tom"	5	4.86914	2.20661
14_"Micro-Tom"	5	3.39849	1.8435
14_"Micro-Tom"	5	3.4224	1.84997
14_"Micro-Tom"	5	2.51055	1.58447
14_"Micro-Tom"	5	2.03306	1.42585
14_"Micro-Tom"	5	2.2573	1.50243
14_"Micro-Tom"	5	2.76349	1.66238
14_"Micro-Tom"	5	1.50476	1.22669
14_"Micro-Tom"	5	1.62305	1.27399
14_"Micro-Tom"	5	1.14481	1.06996
14_"Micro-Tom"	5	1.02833	1.01406
14_"Micro-Tom"	5	1.38754	1.17794
14_"Micro-Tom"	5	0.886447	0.941513
14_"Micro-Tom"	5	0.831289	0.911751
14_"Micro-Tom"	5	1.28849	1.13512
14_"Micro-Tom"	8	3.68692	1.92014
14_"Micro-Tom"	8	3.3716	1.83619
14_"Micro-Tom"	8	10.2552	3.20237
14_"Micro-Tom"	8	2.91259	1.70663
14_"Micro-Tom"	8	5.52941	2.35147
14_"Micro-Tom"	8	5.34738	2.31244
14_"Micro-Tom"	8	2.86721	1.69328
14_"Micro-Tom"	8	6.61919	2.57278
14_"Micro-Tom"	8	7.19212	2.68181
14_"Micro-Tom"	8	8.13347	2.85192
14_"Micro-Tom"	8	7.53284	2.7446
14_"Micro-Tom"	8	1.03194	1.01584
14_"Micro-Tom"	8	7.08572	2.6619
14_"Micro-Tom"	8	5.63942	2.37475
14_"Micro-Tom"	8	2.73224	1.65295
14_"Micro-Tom"	8	2.36251	1.53705
14_"Micro-Tom"	8	2.55699	1.59906
14_"Micro-Tom"	8	1.58383	1.2585
14_"Micro-Tom"	8	3.71518	1.92748
14_"Micro-Tom"	8	1.67851	1.29558
14_"Micro-Tom"	8	1.47426	1.21419
14_"Micro-Tom"	8	1.36394	1.16788
14_"Micro-Tom"	8	1.15022	1.07248
14_"Micro-Tom"	8	0.973168	0.986493
14_"Micro-Tom"	9	5.02366	2.24135
14_"Micro-Tom"	9	5.65162	2.37731
14_"Micro-Tom"	9	4.81759	2.1949
14_"Micro-Tom"	9	3.15383	1.7759
14_"Micro-Tom"	9	6.57081	2.56336
14_"Micro-Tom"	9	5.95069	2.4394
14_"Micro-Tom"	9	7.17967	2.67949
14_"Micro-Tom"	9	7.74071	2.78221
14_"Micro-Tom"	9	6.00554	2.45062
14_"Micro-Tom"	9	7.4087	2.72189
14_"Micro-Tom"	9	5.27044	2.29574
14_"Micro-Tom"	9	5.76387	2.40081
14_"Micro-Tom"	9	7.6119	2.75897
14_"Micro-Tom"	9	4.03922	2.00978
14_"Micro-Tom"	9	6.80857	2.60932
14_"Micro-Tom"	9	3.60667	1.89912
14_"Micro-Tom"	9	7.02048	2.64962
14_"Micro-Tom"	9	3.87013	1.96727
14_"Micro-Tom"	9	2.36326	1.53729
14_"Micro-Tom"	9	3.1397	1.77192
14_"Micro-Tom"	9	4.50918	2.12348
14_"Micro-Tom"	9	6.63425	2.5757
14_"Micro-Tom"	9	3.09986	1.76064
14_"Micro-Tom"	9	2.54137	1.59417
14_"Micro-Tom"	9	2.11723	1.45507
14_"Micro-Tom"	9	2.4097	1.55232
14_"Micro-Tom"	9	2.03561	1.42675
14_"Micro-Tom"	10	6.76094	2.60018
14_"Micro-Tom"	10	4.13136	2.03257
14_"Micro-Tom"	10	6.4737	2.54435
14_"Micro-Tom"	10	6.9802	2.64201
14_"Micro-Tom"	10	5.02515	2.24169
14_"Micro-Tom"	10	4.3147	2.07719
14_"Micro-Tom"	10	3.10888	1.7632
14_"Micro-Tom"	10	3.35205	1.83086
14_"Micro-Tom"	10	3.16373	1.77869
14_"Micro-Tom"	10	1.29285	1.13703
14_"Micro-Tom"	10	1.62485	1.2747
14_"Micro-Tom"	10	5.37098	2.31754
14_"Micro-Tom"	10	1.50763	1.22785
14_"Micro-Tom"	10	5.15981	2.27152
14_"Micro-Tom"	10	3.91702	1.97915
14_"Micro-Tom"	10	1.36394	1.16788
14_"Micro-Tom"	10	1.47065	1.2127
14_"Micro-Tom"	10	2.18546	1.47833
14_"Micro-Tom"	10	1.94634	1.39511
14_"Micro-Tom"	10	0.761252	0.872498
14_"Micro-Tom"	10	1.13354	1.06468
14_"Micro-Tom"	10	0.780489	0.883453
14_"Micro-Tom"	10	1.08709	1.04264
14_"Micro-Tom"	10	1.17637	1.0846
14_"Micro-Tom"	10	0.698126	0.835539
14_"Micro-Tom"	11	4.57909	2.13988
14_"Micro-Tom"	11	7.66407	2.76841
14_"Micro-Tom"	11	3.12812	1.76865
14_"Micro-Tom"	11	4.23881	2.05884
14_"Micro-Tom"	11	7.47407	2.73388
14_"Micro-Tom"	11	6.04912	2.4595
14_"Micro-Tom"	11	8.29739	2.88052
14_"Micro-Tom"	11	6.92399	2.63135
14_"Micro-Tom"	11	5.17126	2.27404
14_"Micro-Tom"	11	6.91633	2.62989
14_"Micro-Tom"	11	4.30841	2.07567
14_"Micro-Tom"	11	5.33792	2.31039
14_"Micro-Tom"	11	7.71755	2.77805
14_"Micro-Tom"	11	8.59093	2.93103
14_"Micro-Tom"	11	4.03094	2.00772
14_"Micro-Tom"	11	3.90637	1.97645
14_"Micro-Tom"	11	7.57853	2.75291
14_"Micro-Tom"	11	4.78335	2.18709
14_"Micro-Tom"	11	2.19884	1.48285
14_"Micro-Tom"	11	3.40211	1.84448
14_"Micro-Tom"	11	2.40385	1.55043
14_"Micro-Tom"	11	2.81865	1.67888
14_"Micro-Tom"	11	3.49754	1.87017
[truncated: 897 more rows]

## Sheet: LR angle
Genotype	plant		angle pr	angle +	angle -	angle + cor	angle - cor	angle	180-angle	log2(180-angle)			genotype	Recuento	Promedio	Mediana	DE	CV	Mínimo	Máximo	Rango	Sesgo	Curtosis		genotype	Casos	Media	Grupos Homogéneos
01_S. corneliomulleri	2	neg	28.7691	31.689		60.4581		60.4581	119.542	6.90137			01_S. corneliomulleri	100	111.946	113.94	18.8562	0.16844	74.145	156.943	82.798	0.278748	-0.723472		06_S. arcanum	69	6.72718	X	a
01_S. corneliomulleri	2				83.3201		54.551	54.551	125.449	6.97096			02_S. peruvianum	162	113.31	108.995	23.904	0.210961	54.127	172.852	118.725	1.71862	-0.199407		05_S. chmielewskii	20	6.78506	XXXX	abcd
01_S. corneliomulleri	2			52.0667		80.8359		80.8359	99.1641	6.63175			03_S. chilense	122	111.592	111.012	14.3182	0.128308	77.425	145.816	68.391	0.613148	-0.338443		01_S. corneliomulleri	100	6.7858	XXX	abc
01_S. corneliomulleri	2				59.3354		30.5663	30.5663	149.434	7.22336			04_S. huaylasense	105	114.694	110.619	19.7626	0.172308	75.825	163.621	87.796	2.07707	-0.466014		03_S. chilense	122	6.79018	XXX	abc
01_S. corneliomulleri	2				68.7495		39.9804	39.9804	140.02	7.12949			05_S. chmielewskii	20	111.805	108.57	19.1059	0.170887	81.944	150.061	68.117	0.706819	-0.696873		11_"Craigella"	367	6.79033	XX	ab
01_S. corneliomulleri	2			63.6025		92.3716		92.3716	87.6284	6.45333			06_S. arcanum	69	106.442	107.619	10.2499	0.0962955	79.505	130.509	51.004	-0.479777	0.0485769		02_S. peruvianum	162	6.79154	XX	ab
01_S. corneliomulleri	2				72.0721		43.3029	43.3029	136.697	7.09484			07_S. galapagense	57	118.972	120.139	15.1558	0.127389	86.212	151.844	65.632	-0.264946	-0.526931		09_S. pimpinelifollium	282	6.79184	XX	ab
01_S. corneliomulleri	2				68.5371		39.768	39.768	140.232	7.13167			08_S. cheesmaniae	39	116.423	115.728	14.2514	0.122411	89.716	139.431	49.715	-0.421924	-1.25176		04_S. huaylasense	105	6.82083	XX	bc
01_S. corneliomulleri	2			41.367		41.367		41.367	138.633	7.11513			09_S. pimpinelifollium	282	111.882	110.065	15.6595	0.139964	74.597	151.355	76.758	2.36229	-0.872779		08_S. cheesmaniae	39	6.8524	XXX	bcd
01_S. corneliomulleri	4	pos	29.3155	55.823		26.5075		26.5075	153.493	7.26202			10_"Ailsa Craig"	246	121.619	120.782	22.9505	0.188708	56.747	180	123.253	0.771358	0.614641		07_S. galapagense	57	6.88265	XX	cd
01_S. corneliomulleri	4				70.6699		99.9854	99.9854	80.0146	6.32219			11_"Craigella"	367	111.723	110.596	15.1855	0.135921	72.499	151.052	78.553	1.20465	-0.834584		10_"Ailsa Craig"	246	6.89943	X	d
01_S. corneliomulleri	4			88.3028		58.9873		58.9873	121.013	6.91901			12_"Moneymaker"	102	123.471	124.171	20.5185	0.16618	81.44	168.678	87.238	0.860027	-0.872522		13_"M82"	119	6.90093	X	d
01_S. corneliomulleri	4			83.2464		53.9309		53.9309	126.069	6.97807			13_"M82"	119	120.412	121.064	14.7026	0.122102	82.634	152.545	69.911	-0.126506	-0.672613		12_"Moneymaker"	102	6.92807	X	d
01_S. corneliomulleri	4				64.359		93.6745	93.6745	86.3255	6.43171
01_S. corneliomulleri	4			89.2748		59.9592		59.9592	120.041	6.90738			Total	1790	114.807	113.102	18.5398	0.161486	54.127	180	125.873	6.32264	3.29806
01_S. corneliomulleri	4			90		60.6845		60.6845	119.316	6.89864
01_S. corneliomulleri	4				69.3411		98.6566	98.6566	81.3434	6.34595
01_S. corneliomulleri	5	pos	22.7824	83.0616		60.2792		60.2792	119.721	6.90353
01_S. corneliomulleri	5				74.1569		96.9393	96.9393	83.0607	6.37609			genotype	Recuento	Promedio	Mediana	DE	CV	Mínimo	Máximo	Rango	Sesgo	Curtosis		genotype	Casos	Media	Grupos Homogéneos
01_S. corneliomulleri	5			85.8653		63.0829		63.0829	116.917	6.86934			14_"Micro-Tom"	296	110.281	111.047	12.216	0.110771	81.326	139.28	57.954	-0.182371	-1.63843		15_anthocyanin absent	56	6.71571	X	a
01_S. corneliomulleri	5				83.0728		105.855	105.855	74.1448	6.21227			15_anthocyanin absent	56	107.06	105.6	20.0926	0.187676	60.382	149.901	89.519	-0.0907898	-0.40347		17_bushy	101	6.74228	X	a
01_S. corneliomulleri	5			89.6485		66.8661		66.8661	113.134	6.82189			16_anthocyaninless	383	108.486	108.935	13.6374	0.125706	73.82	145.792	71.972	1.22418	-0.661781		20_sitiens	44	6.74818	XX	ab
01_S. corneliomulleri	5				38.991		61.7734	61.7734	118.227	6.88541			17_bushy	101	108.075	109.189	14.5984	0.135077	68.096	147.947	79.851	-0.475603	1.25723		16_anthocyaninless	383	6.74984	X	a
01_S. corneliomulleri	5			65.1707		42.3882		42.3882	137.612	7.10446			18_lutescent	108	109.176	107.257	11.2202	0.102772	87.939	140.281	52.342	2.30822	0.106239		18_lutescent	108	6.76306	XX	ab
01_S. corneliomulleri	6	pos	18.3809		68.6631		87.044	87.044	92.956	6.53848			19_Never ripe	122	113.915	111.719	13.3918	0.117559	85.795	147.734	61.939	1.41769	-0.253916		14_"Micro-Tom"	296	6.77618	XX	ab
01_S. corneliomulleri					51.7571		70.138	70.138	109.862	6.77955			20_sitiens	44	109.066	104.42	19.5458	0.179211	82.035	152.153	70.118	1.68948	-0.693038		19_Never ripe	122	6.82254	X	b
01_S. corneliomulleri					40.3141		58.695	58.695	121.305	6.9225
01_S. corneliomulleri				71.5651		53.1842		53.1842	126.816	6.98659			Total	1110	109.542	109.563	13.8812	0.12672	60.382	152.153	91.771	1.45112	0.918996
01_S. corneliomulleri				73.4127		55.0318		55.0318	124.968	6.96542
01_S. corneliomulleri	7	pos	21.1022	70.9744		49.8722		49.8722	130.128	7.02379
01_S. corneliomulleri					76.2284		97.3306	97.3306	82.6694	6.36928
01_S. corneliomulleri				63.8457		42.7435		42.7435	137.256	7.10073															genotype	Recuento	Promedio	Mediana	DE	CV	Mínimo	Máximo	Rango	Sesgo	Curtosis
01_S. corneliomulleri					59.5852		80.6873	80.6873	99.3127	6.63391															01_S. corneliomulleri	100	6.7862	6.835	0.248689	0.0366462	6.21	7.29	1.08	-1.35628	-0.804616
01_S. corneliomulleri					43.5589		64.6611	64.6611	115.339	6.84974															02_S. peruvianum	162	6.79198	6.77	0.311051	0.0457968	5.76	7.43	1.67	-1.87181	1.75117
01_S. corneliomulleri				77.074		55.9718		55.9718	124.028	6.95452															03_S. chilense	122	6.79	6.795	0.187048	0.0275475	6.27	7.19	0.92	-0.971213	-0.0599564
01_S. corneliomulleri				85.7108		64.6087		64.6087	115.391	6.85039															04_S. huaylasense	105	6.82086	6.79	0.245538	0.035998	6.24	7.35	1.11	0.391942	-0.743726
01_S. corneliomulleri					84.2894		105.392	105.392	74.6084	6.22127															05_S. chmielewskii	20	6.7845	6.76	0.245367	0.0361658	6.36	7.23	0.87	0.220967	-0.770844
01_S. corneliomulleri	8	neg	2.03585	70.3993		72.4352		72.4352	107.565	6.74906															06_S. arcanum	69	6.7271	6.75	0.141651	0.0210568	6.31	7.03	0.72	-1.46579	0.572976
01_S. corneliomulleri				66.1613		68.1971		68.1971	111.803	6.80481															07_S. galapagense	57	6.88281	6.91	0.187462	0.0272363	6.43	7.25	0.82	-1.16743	-0.396591
01_S. corneliomulleri				68.3177		70.3536		70.3536	109.646	6.77672															08_S. cheesmaniae	39	6.85179	6.85	0.180582	0.0263554	6.49	7.12	0.63	-0.913149	-1.09841
01_S. corneliomulleri	10	pos	16.2971	72.8597		56.5625		56.5625	123.437	6.94764															09_S. pimpinelifollium	282	6.79163	6.78	0.201323	0.0296429	6.22	7.24	1.02	-0.127208	-0.634401
01_S. corneliomulleri					59.5345		75.8316	75.8316	104.168	6.70277															10_"Ailsa Craig"	246	6.89947	6.915	0.28329	0.0410597	5.83	7.49	1.66	-3.76201	3.42092
01_S. corneliomulleri					61.4086		77.7057	77.7057	102.294	6.67658															11_"Craigella"	367	6.79046	6.79	0.19842	0.0292204	6.18	7.24	1.06	-1.69204	-0.276126
01_S. corneliomulleri					78.3106		94.6078	94.6078	85.3922	6.41603															12_"Moneymaker"	102	6.92804	6.955	0.242491	0.0350014	6.35	7.4	1.05	-0.710937	-0.823031
01_S. corneliomulleri					77.4712		93.7683	93.7683	86.2317	6.43015															13_"M82"	119	6.90118	6.92	0.179614	0.0260266	6.37	7.25	0.88	-1.60292	-0.0826762
01_S. corneliomulleri					86.236		102.533	102.533	77.4669	6.27551															14_"Micro-Tom"	296	6.77618	6.795	0.162	0.0239073	6.35	7.12	0.77	-1.97539	-1.40234
01_S. corneliomulleri				73.9741		57.677		57.677	122.323	6.93455															15_anthocyanin absent	56	6.71571	6.72	0.282912	0.0421269	5.92	7.23	1.31	-1.74338	0.602055
01_S. corneliomulleri					81.8699		98.167	98.167	81.833	6.35461															16_anthocyaninless	383	6.74984	6.77	0.182663	0.0270619	6.21	7.19	0.98	-1.53356	-0.357636
01_S. corneliomulleri					60.5416		76.8387	76.8387	103.161	6.68876															17_bushy	101	6.74228	6.77	0.202163	0.0299843	6.09	7.21	1.12	-2.71827	2.59405
01_S. corneliomulleri					82.4054		98.7025	98.7025	81.2975	6.34514															18_lutescent	108	6.76306	6.745	0.14599	0.0215864	6.46	7.13	0.67	1.25789	-0.616436
01_S. corneliomulleri				83.6598		67.3627		67.3627	112.637	6.81554															19_Never ripe	122	6.82254	6.805	0.169377	0.0248261	6.42	7.21	0.79	-0.00516673	-0.39245
01_S. corneliomulleri	11	pos	6.36281		69.969		76.3318	76.3318	103.668	6.69583															20_sitiens	44	6.74818	6.705	0.251482	0.0372666	6.36	7.25	0.89	0.951177	-1.05468
01_S. corneliomulleri				57.4803		51.1175		51.1175	128.883	7.00991															Total	2900	6.80106	6.8	0.219045	0.0322074	5.76	7.49	1.73	-3.40391	8.1201
01_S. corneliomulleri				47.4293		41.0665		41.0665	138.934	7.11825
01_S. corneliomulleri					60.2145		66.5774	66.5774	113.423	6.82556
01_S. corneliomulleri	12	neg	19.745	45		64.745		64.745	115.255	6.84869
01_S. corneliomulleri				48.3997		68.1447		68.1447	111.855	6.80549			01_S. corneliomulleri	100	68.0537	66.06	18.8562	0.277078
01_S. corneliomulleri					65.7185		45.9735	45.9735	134.026	7.06637			02_S. peruvianum	162	66.69	71.005	23.904	0.358435
01_S. corneliomulleri				56.5467		76.2917		76.2917	103.708	6.69639			03_S. chilense	122	68.4075	68.9875	14.3182	0.209307
01_S. corneliomulleri				45.8814		65.6264		65.6264	114.374	6.83761			04_S. huaylasense	105	65.306	69.381	19.7626	0.302616
01_S. corneliomulleri	13	neg	26.7031	5.97002		32.6731		32.6731	147.327	7.20288			05_S. chmielewskii	20	68.1954	71.4305	19.1059	0.280164
01_S. corneliomulleri					86.5201		59.817	59.817	120.183	6.90909			06_S. arcanum	69	73.5583	72.381	10.2499	0.139344
01_S. corneliomulleri					73.596		46.8929	46.8929	133.107	7.05644			07_S. galapagense	57	61.0278	59.861	15.1558	0.248342
01_S. corneliomulleri				28.3008		55.0039		55.0039	124.996	6.96574			08_S. cheesmaniae	39	63.5774	64.272	14.2514	0.224159
01_S. corneliomulleri					88.0908		61.3877	61.3877	118.612	6.89011			09_S. pimpinelifollium	282	68.1178	69.9355	15.6595	0.229888
01_S. corneliomulleri	14	neg	1.31314		85.0063		83.6931	83.6931	96.3069	6.58957			10_"Ailsa Craig"	246	58.3809	59.218	22.9505	0.393117
01_S. corneliomulleri					67.8074		66.4942	66.4942	113.506	6.82662			11_"Craigella"	367	68.2771	69.4042	15.1854	0.222409
01_S. corneliomulleri					64.4608		63.1477	63.1477	116.852	6.86854			12_"Moneymaker"	102	56.5286	55.829	20.5185	0.362976
01_S. corneliomulleri				79.2986		80.6118		80.6118	99.3882	6.635			13_"M82"	119	59.5877	58.936	14.7026	0.246739
01_S. corneliomulleri				87.337		88.6501		88.6501	91.3499	6.51333			Total	1790	65.1927	66.8975	18.5398	0.284384
01_S. corneliomulleri				79.0558		80.3689		80.3689	99.6311	6.63852
01_S. corneliomulleri				64.0256		65.3387		65.3387	114.661	6.84123
01_S. corneliomulleri					85.1355		83.8223	83.8223	96.1777	6.58763
01_S. corneliomulleri	15	pos	6.26088	33.1262		26.8653		26.8653	153.135	7.25866
01_S. corneliomulleri				29.3183		23.0574		23.0574	156.943	7.29409
01_S. corneliomulleri					78.2614		84.5223	84.5223	95.4777	6.57709
01_S. corneliomulleri					88.9949		95.2558	95.2558	84.7442	6.40504
01_S. corneliomulleri					74.6237		80.8846	80.8846	99.1154	6.63104
01_S. corneliomulleri					68.1986		74.4595	74.4595	105.541	6.72165
01_S. corneliomulleri	16	pos	5.84185		73.3612		79.203	79.203	100.797	6.65531
01_S. corneliomulleri					85.9858		91.8277	91.8277	88.1723	6.46225
01_S. corneliomulleri					73.6105		79.4523	79.4523	100.548	6.65174
01_S. corneliomulleri					83.1183		88.9601	88.9601	91.0399	6.50843
01_S. corneliomulleri	17	pos	11.3099		77.3004		88.6103	88.6103	91.3897	6.51396
01_S. corneliomulleri				75.4655		64.1556		64.1556	115.844	6.85604
01_S. corneliomulleri					51.7098		63.0198	63.0198	116.98	6.87012
01_S. corneliomulleri	18	pos	23.3281		36.3844		59.7125	59.7125	120.288	6.91034
01_S. corneliomulleri				82.5041		59.176		59.176	120.824	6.91676
01_S. corneliomulleri					33.6901		57.0182	57.0182	122.982	6.9423
01_S. corneliomulleri	19	pos	2.954	69.8537		66.8997		66.8997	113.1	6.82146
01_S. corneliomulleri				86.9335		83.9795		83.9795	96.0205	6.58527
01_S. corneliomulleri				68.3621		65.4081		65.4081	114.592	6.84036
01_S. corneliomulleri				67.3801		64.4261		64.4261	115.574	6.85267
01_S. corneliomulleri					54.9406		57.8946	57.8946	122.105	6.93198
01_S. corneliomulleri				82.4054		79.4514		79.4514	100.549	6.65175
01_S. corneliomulleri				52.5494		49.5954		49.5954	130.405	7.02685
01_S. corneliomulleri	21	neg	2.25231	68.4897		70.742		70.742	109.258	6.77159
01_S. corneliomulleri				69.0151		71.2674		71.2674	108.733	6.76464
01_S. corneliomulleri				67.0679		69.3202		69.3202	110.68	6.79025
01_S. corneliomulleri				55.3048		57.5572		57.5572	122.443	6.93596
02_S. peruvianum	1	neg	22.1893		81.7772		59.5879	59.5879	120.412	6.91184
02_S. peruvianum			22.1893		47.2906		25.1013	25.1013	154.899	7.27518
02_S. peruvianum			22.1893	88.4594		110.649		110.649	69.3513	6.11585
02_S. peruvianum			22.1893		51.9683		29.779	29.779	150.221	7.23094
02_S. peruvianum			22.1893		41.9535		19.7642	19.7642	160.236	7.32405
02_S. peruvianum			22.1893	53.1301		75.3194		75.3194	104.681	6.70985
02_S. peruvianum			22.1893		57.4049		35.2157	35.2157	144.784	7.17776
02_S. peruvianum			22.1893	69.3323		91.5216		91.5216	88.4784	6.46725
02_S. peruvianum			22.1893		69.5196		47.3304	47.3304	132.67	7.05169
02_S. peruvianum			22.1893	18.778		40.9673		40.9673	139.033	7.11928
02_S. peruvianum			22.1893		47.7792		25.5899	25.5899	154.41	7.27062
02_S. peruvianum	2	neg	40.2833	76.8796		117.163		117.163	62.8371	5.97354
02_S. peruvianum			40.2833	84.5329		124.816		124.816	55.1838	5.78617
02_S. peruvianum			40.2833	85.5896		125.873		125.873	54.127	5.75828
02_S. peruvianum			40.2833	47.4717		87.755		87.755	92.245	6.5274
02_S. peruvianum			40.2833		83.3333		43.05	43.05	136.95	7.09751
02_S. peruvianum			40.2833	44.0659		84.3492		84.3492	95.6508	6.5797
02_S. peruvianum			40.2833	42.7974		83.0807		83.0807	96.9193	6.59871
02_S. peruvianum			40.2833	22.249		62.5323		62.5323	117.468	6.87612
02_S. peruvianum			40.2833		76.1088		35.8255	35.8255	144.175	7.17167
02_S. peruvianum			40.2833	33.6136		73.8969		73.8969	106.103	6.72932
02_S. peruvianum			40.2833		6.59992		33.6834	33.6834	146.317	7.19295
02_S. peruvianum	3	pos	1.78653		72.3598		74.1463	74.1463	105.854	6.72593
02_S. peruvianum			1.78653		81.2727		83.0593	83.0593	96.9407	6.59903
02_S. peruvianum			1.78653		73.4		75.1865	75.1865	104.813	6.71168
02_S. peruvianum			1.78653	80.5917		78.8052		78.8052	101.195	6.66099
02_S. peruvianum			1.78653	84.639		82.8524		82.8524	97.1476	6.60211
02_S. peruvianum			1.78653		75.2662		77.0527	77.0527	102.947	6.68576
02_S. peruvianum			1.78653	58.1204		56.3339		56.3339	123.666	6.95031
02_S. peruvianum			1.78653		81.4309		83.2174	83.2174	96.7826	6.59668
02_S. peruvianum			1.78653		17.807		19.5935	19.5935	160.406	7.32559
02_S. peruvianum			1.78653	84.8056		83.019		83.019	96.981	6.59963
02_S. peruvianum			1.78653	56.565		54.7784		54.7784	125.222	6.96834
02_S. peruvianum			1.78653	57.0613		55.2748		55.2748	124.725	6.96261
02_S. peruvianum	4	neg	4.85472		87.2242		82.3695	82.3695	97.6305	6.60926
02_S. peruvianum			4.85472		82.9374		78.0827	78.0827	101.917	6.67126
02_S. peruvianum			4.85472		72.4201		67.5654	67.5654	112.435	6.81294
02_S. peruvianum			4.85472	82.7468		87.6015		87.6015	92.3985	6.5298
02_S. peruvianum			4.85472		34.1451		29.2904	29.2904	150.71	7.23563
02_S. peruvianum			4.85472	70.9744		75.8291		75.8291	104.171	6.70281
02_S. peruvianum			4.85472		49.3987		44.544	44.544	135.456	7.08168
02_S. peruvianum			4.85472	59.3003		64.155		64.155	115.845	6.85605
02_S. peruvianum	5	pos	6.75191		67.6762		74.4281	74.4281	105.572	6.72208
02_S. peruvianum			6.75191		54.1281		60.88	60.88	119.12	6.89627
02_S. peruvianum			6.75191		71.6767		78.4287	78.4287	101.571	6.66635
02_S. peruvianum			6.75191		68.7064		75.4583	75.4583	104.542	6.70793
02_S. peruvianum			6.75191	13.9		7.14807		7.14807	172.852	7.43339
02_S. peruvianum			6.75191		76.3471		83.0991	83.0991	96.9009	6.59844
02_S. peruvianum			6.75191		81.8699		88.6218	88.6218	91.3782	6.51378
02_S. peruvianum			6.75191		90		96.7519	96.7519	83.2481	6.37935
02_S. peruvianum	7	neg	9.67673	87.0643		96.7411		96.7411	83.2589	6.37953
02_S. peruvianum			9.67673	8.39292		18.0697		18.0697	161.93	7.33923
02_S. peruvianum			9.67673		82.6476		72.9709	72.9709	107.029	6.74186
02_S. peruvianum			9.67673		70.3298		60.653	60.653	119.347	6.89902
02_S. peruvianum			9.67673	69.8637		79.5404		79.5404	100.46	6.65047
02_S. peruvianum			9.67673		68.5968		58.9201	58.9201	121.08	6.91982
02_S. peruvianum			9.67673	55.7715		65.4482		65.4482	114.552	6.83986
02_S. peruvianum			9.67673		44.7077		35.0309	35.0309	144.969	7.1796
02_S. peruvianum			9.67673	76.6398		86.3165		86.3165	93.6835	6.54972
02_S. peruvianum			9.67673	72.6176		82.2943		82.2943	97.7057	6.61037
02_S. peruvianum			9.67673	70.4976		80.1743		80.1743	99.8257	6.64134
02_S. peruvianum			9.67673	63.4349		73.1117		73.1117	106.888	6.73996
02_S. peruvianum			9.67673		69.8637		60.187	60.187	119.813	6.90464
02_S. peruvianum			9.67673	70.7693		80.4461		80.4461	99.5539	6.63741
02_S. peruvianum			9.67673		63.4349		53.7582	53.7582	126.242	6.98005
02_S. peruvianum	8	pos	13.6384		75.8867		89.5251	89.5251	90.4749	6.49945
02_S. peruvianum			13.6384	86.1627		72.5244		72.5244	107.476	6.74787
02_S. peruvianum			13.6384	86.8041		73.1657		73.1657	106.834	6.73923
02_S. peruvianum			13.6384	64.0935		50.4551		50.4551	129.545	7.01731
02_S. peruvianum			13.6384	64.4905		50.8522		50.8522	129.148	7.01288
02_S. peruvianum			13.6384	53.5308		39.8924		39.8924	140.108	7.13039
02_S. peruvianum			13.6384	59.2422		45.6038		45.6038	134.396	7.07035
02_S. peruvianum			13.6384		83.9334		97.5717	97.5717	82.4283	6.36507
02_S. peruvianum			13.6384		75.9161		89.5545	89.5545	90.4455	6.49898
02_S. peruvianum			13.6384		77.5926		91.2309	91.2309	88.7691	6.47198
02_S. peruvianum			13.6384		45.9094		59.5477	59.5477	120.452	6.91232
02_S. peruvianum	9	pos	6.52316		74.8388		81.3619	81.3619	98.6381	6.62407
02_S. peruvianum			6.52316		89.5756		96.0988	96.0988	83.9012	6.39062
02_S. peruvianum			6.52316		87.5224		94.0456	94.0456	85.9544	6.4255
02_S. peruvianum			6.52316		85.6913		92.2145	92.2145	87.7855	6.45591
02_S. peruvianum			6.52316	43.9013		37.3782		37.3782	142.622	7.15605
02_S. peruvianum			6.52316		88.0538		94.577	94.577	85.423	6.41655
02_S. peruvianum			6.52316		90		96.5232	96.5232	83.4768	6.3833
02_S. peruvianum			6.52316	78.1929		71.6698		71.6698	108.33	6.75929
02_S. peruvianum			6.52316		72.1572		78.6804	78.6804	101.32	6.66277
02_S. peruvianum			6.52316	55.6081		49.0849		49.0849	130.915	7.03249
02_S. peruvianum			6.52316		48.1221		54.6453	54.6453	125.355	6.96987
02_S. peruvianum			6.52316		8.70222		15.2254	15.2254	164.775	7.36435
02_S. peruvianum	10	neg	21.6951		88.7614		67.0663	67.0663	112.934	6.81933
02_S. peruvianum			21.6951		82.7183		61.0232	61.0232	118.977	6.89454
02_S. peruvianum			21.6951		82.4927		60.7975	60.7975	119.202	6.89727
02_S. peruvianum			21.6951	89.1398		110.835		110.835	69.1651	6.11197
02_S. peruvianum			21.6951	74.876		96.5711		96.5711	83.4289	6.38248
02_S. peruvianum			21.6951		78.4114		56.7163	56.7163	123.284	6.94584
02_S. peruvianum			21.6951		71.5184		49.8232	49.8232	130.177	7.02433
02_S. peruvianum			21.6951	58.5851		80.2802		80.2802	99.7198	6.63981
02_S. peruvianum			21.6951	60.717		82.4121		82.4121	97.5879	6.60863
02_S. peruvianum			21.6951	51.2763		72.9715		72.9715	107.029	6.74185
02_S. peruvianum			21.6951	47.178		68.8731		68.8731	111.127	6.79606
02_S. peruvianum			21.6951		84.6855		62.9903	62.9903	117.01	6.87048
02_S. peruvianum			21.6951	28.5746		50.2697		50.2697	129.73	7.01937
02_S. peruvianum			21.6951	19.9831		41.6782		41.6782	138.322	7.11188
02_S. peruvianum	11	neg	3.3779		88.4434		85.0655	85.0655	94.9345	6.56886
02_S. peruvianum			3.3779		87.1122		83.7343	83.7343	96.2657	6.58895
02_S. peruvianum			3.3779		80.278		76.9001	76.9001	103.1	6.6879
02_S. peruvianum			3.3779	70.7693		74.1472		74.1472	105.853	6.72592
02_S. peruvianum			3.3779		84.447		81.0691	81.0691	98.9309	6.62835
02_S. peruvianum			3.3779		53.3257		49.9478	49.9478	130.052	7.02295
02_S. peruvianum			3.3779	79.5625		82.9404		82.9404	97.0596	6.6008
02_S. peruvianum			3.3779		80.3112		76.9333	76.9333	103.067	6.68743
02_S. peruvianum			3.3779	62.3933		65.7712		65.7712	114.229	6.83578
02_S. peruvianum			3.3779	76.2392		79.6171		79.6171	100.383	6.64937
02_S. peruvianum			3.3779	64.6871		68.065		68.065	111.935	6.80652
02_S. peruvianum			3.3779	50.1669		53.5448		53.5448	126.455	6.98248
02_S. peruvianum			3.3779	7.32191		10.6998		10.6998	169.3	7.40344
02_S. peruvianum	12	pos	13.9669	31.354		17.3872		17.3872	162.613	7.3453
02_S. peruvianum			13.9669	73.7883		59.8214		59.8214	120.179	6.90904
02_S. peruvianum			13.9669	78.5824		64.6156		64.6156	115.384	6.8503
02_S. peruvianum			13.9669		78.3106		92.2775	92.2775	87.7225	6.45488
02_S. peruvianum			13.9669		84.1176		98.0844	98.0844	81.9156	6.35607
02_S. peruvianum			13.9669	84.3071		70.3402		70.3402	109.66	6.77689
02_S. peruvianum			13.9669		84.6656		98.6324	98.6324	81.3676	6.34638
02_S. peruvianum			13.9669	87.0166		73.0497		73.0497	106.95	6.7408
02_S. peruvianum			13.9669		76.0831		90.05	90.05	89.95	6.49105
02_S. peruvianum			13.9669	88.4198		74.453		74.453	105.547	6.72174
02_S. peruvianum			13.9669		56.1717		70.1386	70.1386	109.861	6.77954
02_S. peruvianum			13.9669	81.6492		67.6824		67.6824	112.318	6.81144
02_S. peruvianum			13.9669		44.3806		58.3475	58.3475	121.653	6.92662
02_S. peruvianum			13.9669		19.44		33.4069	33.4069	146.593	7.19567
02_S. peruvianum	13	pos	10.1186	72.9862		62.8677		62.8677	117.132	6.872
02_S. peruvianum			10.1186	75.0973		64.9788		64.9788	115.021	6.84576
02_S. peruvianum			10.1186	79.7778		69.6593		69.6593	110.341	6.78582
02_S. peruvianum			10.1186	84.6897		74.5711		74.5711	105.429	6.72013
02_S. peruvianum			10.1186	75.2076		65.089		65.089	114.911	6.84437
02_S. peruvianum			10.1186	80.4399		70.3213		70.3213	109.679	6.77714
02_S. peruvianum			10.1186	82.5457		72.4271		72.4271	107.573	6.74917
02_S. peruvianum			10.1186	65.531		55.4125		55.4125	124.588	6.96102
02_S. peruvianum			10.1186	65.9098		55.7913		55.7913	124.209	6.95662
02_S. peruvianum			10.1186		59.1723		69.2909	69.2909	110.709	6.79063
02_S. peruvianum			10.1186		62.0871		72.2056	72.2056	107.794	6.75214
02_S. peruvianum			10.1186		39.2072		49.3258	49.3258	130.674	7.02983
02_S. peruvianum			10.1186	88.6831		78.5645		78.5645	101.435	6.66442
02_S. peruvianum	14	pos	34.7559		65.8404		100.596	100.596	79.4037	6.31113
02_S. peruvianum			34.7559	71.8619		37.106		37.106	142.894	7.1588
02_S. peruvianum			34.7559		45.2502		80.0061	80.0061	99.9939	6.64377
02_S. peruvianum			34.7559	53.5518		18.7959		18.7959	161.204	7.33274
02_S. peruvianum			34.7559	60.208		25.4521		25.4521	154.548	7.27191
02_S. peruvianum			34.7559	87.3246		52.5687		52.5687	127.431	6.99358
02_S. peruvianum			34.7559	83.6095		48.8536		48.8536	131.146	7.03503
02_S. peruvianum			34.7559		52.9435		87.6994	87.6994	92.3006	6.52827
02_S. peruvianum	18	pos	70.5192		10.4543		80.9735	80.9735	99.0265	6.62974
02_S. peruvianum			70.5192	41.6051		28.9141		28.9141	151.086	7.23922
02_S. peruvianum			70.5192	5.66729		64.8519		64.8519	115.148	6.84735
02_S. peruvianum			70.5192	49.8991		20.6201		20.6201	159.38	7.31633
02_S. peruvianum			70.5192		44.2927		114.812	114.812	65.1881	6.02654
02_S. peruvianum			70.5192	9.8193		60.6999		60.6999	119.3	6.89845
02_S. peruvianum	20	pos	48.2325	67.6594		19.4268		19.4268	160.573	7.32709
02_S. peruvianum			48.2325		42.6375		90.87	90.87	89.13	6.47784
02_S. peruvianum			48.2325	21.8014		26.4311		26.4311	153.569	7.26274
02_S. peruvianum			48.2325		27.1572		75.3898	75.3898	104.61	6.70888
02_S. peruvianum			48.2325		28.1416		76.3741	76.3741	103.626	6.69524
02_S. peruvianum			48.2325	86.5318		38.2992		38.2992	141.701	7.1467
03_S. chilense	1	pos	35.542		57.7712		93.3133	93.3133	86.6867	6.43774
03_S. chilense			35.542		2.96094		38.5029	38.5029	141.497	7.14463
03_S. chilense			35.542	89.4543		53.9123		53.9123	126.088	6.97828
03_S. chilense			35.542		60.8267		96.3687	96.3687	83.6313	6.38597
03_S. chilense			35.542		29.7335		65.2755	65.2755	114.725	6.84203
03_S. chilense			35.542		29.9285		65.4705	65.4705	114.529	6.83958
03_S. chilense			35.542		21.0375		56.5795	56.5795	123.42	6.94744
03_S. chilense			35.542		30.9941		66.5361	66.5361	113.464	6.82609
03_S. chilense			35.542		40.3921		75.9341	75.9341	104.066	6.70135
03_S. chilense			35.542		39.6233		75.1653	75.1653	104.835	6.71197
03_S. chilense	2	pos	4.82936	80.9755		76.1461		76.1461	103.854	6.69841
03_S. chilense			4.82936	77.3028		72.4734		72.4734	107.527	6.74855
03_S. chilense			4.82936	75.0209		70.1915		70.1915	109.808	6.77885
03_S. chilense			4.82936		67.0679		71.8973	71.8973	108.103	6.75626
03_S. chilense			4.82936	77.8481		73.0188		73.0188	106.981	6.74121
03_S. chilense			4.82936	73.3988		68.5694		68.5694	111.431	6.8
03_S. chilense			4.82936		67.4204		72.2498	72.2498	107.75	6.75155
03_S. chilense			4.82936		61.5688		66.3982	66.3982	113.602	6.82784
03_S. chilense			4.82936	82.7857		77.9564		77.9564	102.044	6.67304
03_S. chilense			4.82936	67.6024		62.773		62.773	117.227	6.87316
03_S. chilense			4.82936		70.9065		75.7359	75.7359	104.264	6.7041
03_S. chilense			4.82936		76.7595		81.5888	81.5888	98.4112	6.62075
03_S. chilense	3	pos	3.0574		60.7512		63.8086	63.8086	116.191	6.86036
03_S. chilense			3.0574		59.1911		62.2485	62.2485	117.751	6.8796
03_S. chilense			3.0574		37.1709		40.2283	40.2283	139.772	7.12693
03_S. chilense			3.0574	87.4438		84.3864		84.3864	95.6136	6.57914
03_S. chilense	4	neg	79.7414	0.489696		80.2311		80.2311	99.7689	6.64052
03_S. chilense			79.7414	9.78916		89.5305		89.5305	90.4695	6.49936
03_S. chilense			79.7414	22.8337		102.575		102.575	77.425	6.27473
03_S. chilense			79.7414		10.5392		69.2022	69.2022	110.798	6.79179
03_S. chilense	5	neg	10.4901		84.0402		73.55	73.55	106.45	6.73403
03_S. chilense			10.4901		72.7809		62.2908	62.2908	117.709	6.87908
03_S. chilense			10.4901		69.8967		59.4066	59.4066	120.593	6.91401
03_S. chilense			10.4901	75.0917		85.5819		85.5819	94.4181	6.56099
03_S. chilense			10.4901	58.2206		68.7107		68.7107	111.289	6.79817
03_S. chilense			10.4901		74.2774		63.7873	63.7873	116.213	6.86062
03_S. chilense			10.4901	75.2374		85.7275		85.7275	94.2725	6.55876
03_S. chilense			10.4901	89.3905		99.8806		99.8806	80.1194	6.32408
03_S. chilense	7	neg	8.59356	77.3196		85.9132		85.9132	94.0868	6.55592
03_S. chilense			8.59356	77.7995		86.3931		86.3931	93.6069	6.54854
03_S. chilense	9	pos	24.4309		21.7713		46.2022	46.2022	133.798	7.06391
03_S. chilense			24.4309	84.782		60.3511		60.3511	119.649	6.90266
03_S. chilense			24.4309	84.2894		59.8585		59.8585	120.141	6.90859
03_S. chilense			24.4309	80.6279		56.197		56.197	123.803	6.9519
03_S. chilense			24.4309		53.6864		78.1173	78.1173	101.883	6.67077
03_S. chilense			24.4309		42.337		66.7679	66.7679	113.232	6.82314
03_S. chilense	10	pos	15.3051	73.1711		57.866		57.866	122.134	6.93232
03_S. chilense			15.3051		39.6678		54.9729	54.9729	125.027	6.9661
03_S. chilense			15.3051	88.8065		73.5015		73.5015	106.499	6.73469
03_S. chilense			15.3051		47.712		63.017	63.017	116.983	6.87015
03_S. chilense			15.3051	58.5909		43.2859		43.2859	136.714	7.09502
03_S. chilense			15.3051		52.4652		67.7702	67.7702	112.23	6.81031
03_S. chilense			15.3051		51.2317		66.5368	66.5368	113.463	6.82608
03_S. chilense			15.3051	83.1987		67.8936		67.8936	112.106	6.80872
03_S. chilense			15.3051	68.6973		53.3923		53.3923	126.608	6.98422
03_S. chilense			15.3051	67.3354		52.0304		52.0304	127.97	6.99966
03_S. chilense	11	pos	31.6745	70.475		38.8005		38.8005	141.2	7.14159
03_S. chilense			31.6745		63.9542		95.6287	95.6287	84.3713	6.39868
03_S. chilense			31.6745		55.5278		87.2023	87.2023	92.7977	6.53602
03_S. chilense			31.6745		39.8056		71.4801	71.4801	108.52	6.76182
03_S. chilense	12	pos	7.5341	78.2692		70.7351		70.7351	109.265	6.77169
03_S. chilense			7.5341	65.8582		58.3241		58.3241	121.676	6.9269
03_S. chilense			7.5341	64.508		56.9739		56.9739	123.026	6.94282
03_S. chilense			7.5341		71.0033		78.5374	78.5374	101.463	6.6648
03_S. chilense			7.5341		63.8609		71.395	71.395	108.605	6.76295
03_S. chilense			7.5341	76.3287		68.7946		68.7946	111.205	6.79708
03_S. chilense			7.5341	86.6335		79.0994		79.0994	100.901	6.65679
03_S. chilense			7.5341	89.3704		81.8363		81.8363	98.1637	6.61712
03_S. chilense			7.5341		74.5778		82.1119	82.1119	97.8881	6.61306
03_S. chilense			7.5341	71.5651		64.0309		64.0309	115.969	6.8576
03_S. chilense	13	neg	19.6779	89.4213		69.7434		69.7434	110.257	6.78472
03_S. chilense			19.6779	76.866		57.1881		57.1881	122.812	6.94031
03_S. chilense			19.6779	80.0738		60.3959		60.3959	119.604	6.90212
03_S. chilense			19.6779	89.7016		70.0237		70.0237	109.976	6.78105
03_S. chilense			19.6779	59.5889		39.9111		39.9111	140.089	7.1302
03_S. chilense			19.6779	74.1072		54.4293		54.4293	125.571	6.97236
03_S. chilense			19.6779	62.0029		42.325		42.325	137.675	7.10512
03_S. chilense			19.6779	54.7824		35.1045		35.1045	144.895	7.17887
03_S. chilense	14	neg	0.135291	78.4341		78.5693		78.5693	101.431	6.66435
03_S. chilense			0.135291	75.8445		75.9798		75.9798	104.02	6.70072
03_S. chilense			0.135291	77.3406		77.4759		77.4759	102.524	6.67982
03_S. chilense			0.135291	64.6871		64.8224		64.8224	115.178	6.84772
03_S. chilense			0.135291		55.3253		55.19	55.19	124.81	6.96359
03_S. chilense			0.135291	85.6711		85.8064		85.8064	94.1936	6.55756
03_S. chilense			0.135291		49.2244		49.0891	49.0891	130.911	7.03244
03_S. chilense			0.135291	73.1588		73.2941		73.2941	106.706	6.7375
03_S. chilense			0.135291	77.0054		77.1407		77.1407	102.859	6.68453
03_S. chilense			0.135291		70.0169		69.8816	69.8816	110.118	6.78291
03_S. chilense			0.135291		52.7403		52.605	52.605	127.395	6.99316
03_S. chilense			0.135291		77.6003		77.465	77.465	102.535	6.67997
03_S. chilense			0.135291	69.0442		69.1795		69.1795	110.82	6.79208
03_S. chilense			0.135291		68.6542		68.5189	68.5189	111.481	6.80066
03_S. chilense			0.135291	60.1541		60.2894		60.2894	119.711	6.90341
03_S. chilense	15	neg	37.6189	37.875		75.4939		75.4939	104.506	6.70744
03_S. chilense			37.6189	37.4054		75.0243		75.0243	104.976	6.71391
03_S. chilense	17	neg	9.99703		71.7481		61.7511	61.7511	118.249	6.88568
03_S. chilense			9.99703	68.1569		78.1539		78.1539	101.846	6.67025
03_S. chilense			9.99703		65.5332		55.5362	55.5362	124.464	6.95958
03_S. chilense			9.99703	76.6672		86.6642		86.6642	93.3358	6.54436
03_S. chilense			9.99703		81.6965		71.6995	71.6995	108.3	6.7589
03_S. chilense	18	neg	29.7863	45		74.7863		74.7863	105.214	6.71718
03_S. chilense			29.7863	32.1159		61.9021		61.9021	118.098	6.88384
03_S. chilense			29.7863		72.867		43.0807	43.0807	136.919	7.09718
03_S. chilense			29.7863		63.9704		34.1841	34.1841	145.816	7.188
03_S. chilense			29.7863	30.6407		60.4269		60.4269	119.573	6.90175
03_S. chilense			29.7863		81.573		51.7868	51.7868	128.213	7.0024
03_S. chilense			29.7863		87.3057		57.5194	57.5194	122.481	6.93641
03_S. chilense			29.7863		77.4712		47.6849	47.6849	132.315	7.04783
03_S. chilense			29.7863	63.4349		93.2212		93.2212	86.7788	6.43927
03_S. chilense	19	pos	24.168	87.217		63.049		63.049	116.951	6.86976
03_S. chilense			24.168	81.1193		56.9513		56.9513	123.049	6.94309
03_S. chilense			24.168		46.3705		70.5385	70.5385	109.462	6.77428
03_S. chilense			24.168		59.7782		83.9462	83.9462	96.0538	6.58577
03_S. chilense	20	pos	26.8364	87.4266		60.5902		60.5902	119.41	6.89978
03_S. chilense			26.8364		62.7232		89.5597	89.5597	90.4403	6.49889
03_S. chilense			26.8364		64.7989		91.6353	91.6353	88.3647	6.4654
03_S. chilense			26.8364		48.2245		75.061	75.061	104.939	6.71341
03_S. chilense	24	pos	7.73196		45.3559		53.0878	53.0878	126.912	6.98769
03_S. chilense			7.73196	86.617		78.885		78.885	101.115	6.65985
03_S. chilense			7.73196	88.2643		80.5323		80.5323	99.4677	6.63616
03_S. chilense			7.73196		80.5377		88.2696	88.2696	91.7304	6.51933
03_S. chilense			7.73196	75.7841		68.0522		68.0522	111.948	6.80668
04_S. huaylasense	1	neg	2.35509	44.4791		46.8342		46.8342	133.166	7.05708
04_S. huaylasense			2.35509		69.2659		66.9108	66.9108	113.089	6.82132
04_S. huaylasense			2.35509		36.3394		33.9843	33.9843	146.016	7.18998
04_S. huaylasense			2.35509	67.1231		69.4782		69.4782	110.522	6.78819
04_S. huaylasense			2.35509	51.0796		53.4347		53.4347	126.565	6.98374
04_S. huaylasense			2.35509		58.0419		55.6868	55.6868	124.313	6.95784
04_S. huaylasense			2.35509	64.0872		66.4423		66.4423	113.558	6.82728
04_S. huaylasense			2.35509		78.0239		75.6688	75.6688	104.331	6.70503
04_S. huaylasense	2	pos	3.59744		70.9588		74.5562	74.5562	105.444	6.72033
04_S. huaylasense			3.59744	79.1715		75.5741		75.5741	104.426	6.70634
04_S. huaylasense			3.59744		59.9314		63.5289	63.5289	116.471	6.86383
04_S. huaylasense			3.59744	89.3692		85.7718		85.7718	94.2282	6.55809
04_S. huaylasense			3.59744	85.8184		82.2209		82.2209	97.7791	6.61145
04_S. huaylasense			3.59744		50.7743		54.3718	54.3718	125.628	6.97302
04_S. huaylasense			3.59744	73.2374		69.64		69.64	110.36	6.78607
04_S. huaylasense			3.59744	70.1626		66.5652		66.5652	113.435	6.82572
04_S. huaylasense			3.59744		36.0274		39.6248	39.6248	140.375	7.13314
04_S. huaylasense			3.59744		61.631		65.2284	65.2284	114.772	6.84262
04_S. huaylasense			3.59744	78.9591		75.3616		75.3616	104.638	6.70927
04_S. huaylasense			3.59744	52.5946		48.9972		48.9972	131.003	7.03345
04_S. huaylasense	3	pos	11.0126		74.2914		85.3039	85.3039	94.6961	6.56523
04_S. huaylasense			11.0126	86.6335		75.621		75.621	104.379	6.70569
04_S. huaylasense			11.0126	86.5629		75.5504		75.5504	104.45	6.70666
04_S. huaylasense			11.0126	81.2874		70.2748		70.2748	109.725	6.77775
04_S. huaylasense			11.0126	86.0489		75.0363		75.0363	104.964	6.71375
04_S. huaylasense			11.0126		45.7252		56.7378	56.7378	123.262	6.94559
04_S. huaylasense			11.0126		63.7755		74.7881	74.7881	105.212	6.71715
04_S. huaylasense			11.0126		50.0131		61.0257	61.0257	118.974	6.89451
04_S. huaylasense			11.0126		63.9967		75.0092	75.0092	104.991	6.71412
04_S. huaylasense			11.0126		43.0519		54.0645	54.0645	125.936	6.97654
04_S. huaylasense			11.0126	85.7636		74.751		74.751	105.249	6.71766
04_S. huaylasense	4	pos	3.94957		39.982		43.9316	43.9316	136.068	7.08819
04_S. huaylasense			3.94957	47.4352		43.4856		43.4856	136.514	7.09291
04_S. huaylasense			3.94957	44.8664		40.9169		40.9169	139.083	7.1198
04_S. huaylasense			3.94957		63.0577		67.0073	67.0073	112.993	6.82009
04_S. huaylasense			3.94957		52.9295		56.879	56.879	123.121	6.94393
04_S. huaylasense			3.94957	51.3887		47.4392		47.4392	132.561	7.05051
04_S. huaylasense			3.94957	64.44		60.4905		60.4905	119.51	6.90098
04_S. huaylasense			3.94957	84.0685		80.1189		80.1189	99.8811	6.64214
04_S. huaylasense			3.94957	37.8065		33.857		33.857	146.143	7.19124
04_S. huaylasense			3.94957		51.9811		55.9306	55.9306	124.069	6.955
04_S. huaylasense	6	neg	50.1837		85.001		34.8174	34.8174	145.183	7.18172
04_S. huaylasense			50.1837		84.6406		34.457	34.457	145.543	7.1853
04_S. huaylasense			50.1837		11.0295		39.1541	39.1541	140.846	7.13797
04_S. huaylasense			50.1837		8.9175		41.2662	41.2662	138.734	7.11618
04_S. huaylasense			50.1837		33.8049		16.3788	16.3788	163.621	7.35422
04_S. huaylasense	7	neg	1.71041	87.8641		89.5745		89.5745	90.4255	6.49866
04_S. huaylasense			1.71041		56.8997		55.1893	55.1893	124.811	6.9636
04_S. huaylasense			1.71041	72.0255		73.7359		73.7359	106.264	6.73151
04_S. huaylasense			1.71041	69.0095		70.7199		70.7199	109.28	6.77189
04_S. huaylasense			1.71041		83.4802		81.7698	81.7698	98.2302	6.61809
04_S. huaylasense			1.71041	60.7512		62.4616		62.4616	117.538	6.87699
04_S. huaylasense			1.71041		74.7449		73.0345	73.0345	106.966	6.741
04_S. huaylasense	9	neg	7.32107	71.5651		78.8861		78.8861	101.114	6.65984
04_S. huaylasense			7.32107	72.9795		80.3005		80.3005	99.6995	6.63951
04_S. huaylasense			7.32107		78.6901		71.369	71.369	108.631	6.76329
04_S. huaylasense			7.32107	74.3578		81.6788		81.6788	98.3212	6.61943
04_S. huaylasense			7.32107	65.3764		72.6975		72.6975	107.302	6.74554
04_S. huaylasense			7.32107		87.2737		79.9526	79.9526	100.047	6.64454
04_S. huaylasense	10	neg	29.5975	68.8387		98.4363		98.4363	81.5637	6.34986
04_S. huaylasense			29.5975	49.5438		79.1413		79.1413	100.859	6.65619
04_S. huaylasense			29.5975	74.5778		104.175		104.175	75.8246	6.24459
04_S. huaylasense			29.5975		77.9885		48.391	48.391	131.609	7.04011
04_S. huaylasense			29.5975		87.5104		57.9129	57.9129	122.087	6.93177
04_S. huaylasense			29.5975	51.1466		80.7442		80.7442	99.2558	6.63308
04_S. huaylasense			29.5975		53.7905		24.193	24.193	155.807	7.28362
04_S. huaylasense			29.5975	69.8637		99.4612		99.4612	80.5388	6.33161
04_S. huaylasense	11	neg	20.7349	75.4111		96.146		96.146	83.854	6.38981
04_S. huaylasense			20.7349	64.3978		85.1327		85.1327	94.8673	6.56784
04_S. huaylasense			20.7349	58.1449		78.8798		78.8798	101.12	6.65993
04_S. huaylasense			20.7349	43.0908		63.8257		63.8257	116.174	6.86015
04_S. huaylasense	13	pos	23.2588		45.6194		68.8782	68.8782	111.122	6.796
04_S. huaylasense			23.2588	45.5355		22.2766		22.2766	157.723	7.30125
04_S. huaylasense			23.2588	78.887		55.6281		55.6281	124.372	6.95852
04_S. huaylasense			23.2588	84.5164		61.2576		61.2576	118.742	6.89169
04_S. huaylasense			23.2588	81.8699		58.6111		58.6111	121.389	6.92349
04_S. huaylasense			23.2588	85.3013		62.0425		62.0425	117.957	6.88212
04_S. huaylasense			23.2588		57.1715		80.4303	80.4303	99.5697	6.63764
04_S. huaylasense	16	neg	8.26243		87.605		79.3426	79.3426	100.657	6.65331
04_S. huaylasense			8.26243	89.4768		97.7392		97.7392	82.2608	6.36213
04_S. huaylasense			8.26243	88.7501		97.0125		97.0125	82.9875	6.37482
04_S. huaylasense			8.26243	84.5039		92.7663		92.7663	87.2337	6.44681
04_S. huaylasense			8.26243		76.3287		68.0663	68.0663	111.934	6.8065
04_S. huaylasense			8.26243	72.0186		80.281		80.281	99.719	6.6398
04_S. huaylasense			8.26243	67.72		75.9824		75.9824	104.018	6.70068
04_S. huaylasense			8.26243		79.0459		70.7835	70.7835	109.216	6.77105
04_S. huaylasense	17	pos	11.1513	68.2341		57.0828		57.0828	122.917	6.94154
04_S. huaylasense			11.1513	39.0626		27.9113		27.9113	152.089	7.24877
04_S. huaylasense			11.1513		68.3142		79.4655	79.4655	100.534	6.65155
04_S. huaylasense			11.1513		80.7644		91.9157	91.9157	88.0843	6.46081
04_S. huaylasense			11.1513		68.344		79.4953	79.4953	100.505	6.65112
04_S. huaylasense			11.1513		83.97		95.1213	95.1213	84.8787	6.40733
04_S. huaylasense			11.1513		8.6955		19.8468	19.8468	160.153	7.32331
04_S. huaylasense	19	neg	27.9856	41.3956		69.3812		69.3812	110.619	6.78945
04_S. huaylasense			27.9856	50.2677		78.2533		78.2533	101.747	6.66884
04_S. huaylasense			27.9856	12.5576		40.5431		40.5431	139.457	7.12368
04_S. huaylasense			27.9856		81.6744		53.6888	53.6888	126.311	6.98084
04_S. huaylasense			27.9856		48.7476		20.7621	20.7621	159.238	7.31504
04_S. huaylasense	21	pos	13.0097		74.3175		87.3273	87.3273	92.6727	6.53407
04_S. huaylasense			13.0097	66.2671		53.2573		53.2573	126.743	6.98576
04_S. huaylasense			13.0097	40.5311		27.5213		27.5213	152.479	7.25246
04_S. huaylasense			13.0097		74.8508		87.8605	87.8605	92.1395	6.52575
04_S. huaylasense			13.0097		54.4623		67.472	67.472	112.528	6.81414
04_S. huaylasense			13.0097		34.6952		47.7049	47.7049	132.295	7.04762
04_S. huaylasense			13.0097	82.4506		69.4409		69.4409	110.559	6.78867
05_S. chmielewskii	1	pos	68.245		15.141		83.386	83.386	96.614	6.59416
05_S. chmielewskii	7	pos	33.9473	85.4261		51.4788		51.4788	128.521	7.00586
05_S. chmielewskii					61.4538		95.4011	95.4011	84.5989	6.40257
05_S. chmielewskii				63.8861		29.9388		29.9388	150.061	7.22941
05_S. chmielewskii	8	pos	30.059	72.2161		42.1571		42.1571	137.843	7.10688
05_S. chmielewskii				79.992		79.992		79.992	100.008	6.64397
05_S. chmielewskii				82.2079		82.2079		82.2079	97.7921	6.61165
05_S. chmielewskii	9	pos	10.2876		87.7688		98.0564	98.0564	81.9436	6.35656
05_S. chmielewskii					75.1243		75.1243	75.1243	104.876	6.71254
05_S. chmielewskii	11	pos	2.07717	69.8142		67.737		67.737	112.263	6.81074
05_S. chmielewskii				69.7751		67.698		67.698	112.302	6.81124
05_S. chmielewskii					80.6829		82.7601	82.7601	97.2399	6.60348
05_S. chmielewskii				46.5482		44.471		44.471	135.529	7.08246
05_S. chmielewskii					76.2637		78.3409	78.3409	101.659	6.6676
05_S. chmielewskii				45		42.9228		42.9228	137.077	7.09884
05_S. chmielewskii	13	pos	13.9869	80.5377		66.5508		66.5508	113.449	6.8259
05_S. chmielewskii					73.0725		87.0593	87.0593	92.9407	6.53824
05_S. chmielewskii	14	neg	10.3663	66.0375		76.4038		76.4038	103.596	6.69483
05_S. chmielewskii					62.3789		52.0126	52.0126	127.987	6.99986
05_S. chmielewskii				49.844		60.2103		60.2103	119.79	6.90436
06_S. arcanum	1	neg	13.4168	57.875		71.2918		71.2918	108.708	6.76432
06_S. arcanum					82.5394		69.1227	69.1227	110.877	6.79282
06_S. arcanum				73.3439		86.7606		86.7606	93.2394	6.54287
06_S. arcanum	2	pos	5.70385	76.4521		70.7482		70.7482	109.252	6.77151
06_S. arcanum			5.70385	88.5436		82.8398		82.8398	97.1602	6.60229
06_S. arcanum			5.70385	69.9218		64.2179		64.2179	115.782	6.85527
06_S. arcanum			5.70385	81.573		75.8692		75.8692	104.131	6.70225
06_S. arcanum	3	neg	15.8289	63.6536		79.4825		79.4825	100.517	6.6513
06_S. arcanum			15.8289	69.8442		85.6731		85.6731	94.3269	6.5596
06_S. arcanum			15.8289		88.516		72.6871	72.6871	107.313	6.74568
06_S. arcanum			15.8289	58.1204		73.9493		73.9493	106.051	6.72861
06_S. arcanum			15.8289		88.2101		72.3812	72.3812	107.619	6.74979
06_S. arcanum	4	pos	11.1436	73.6518		62.5082		62.5082	117.492	6.87642
06_S. arcanum			11.1436		66.8605		78.0042	78.0042	101.996	6.67237
06_S. arcanum			11.1436		58.861		70.0047	70.0047	109.995	6.7813
06_S. arcanum			11.1436	87.1376		75.994		75.994	104.006	6.70052
06_S. arcanum			11.1436		45		56.1436	56.1436	123.856	6.95252
06_S. arcanum			11.1436	76.1303		64.9867		64.9867	115.013	6.84566
06_S. arcanum	6	neg	12.0228	88.4725		100.495		100.495	79.5048	6.31297
06_S. arcanum			12.0228		88.2376		76.2148	76.2148	103.785	6.69746
06_S. arcanum			12.0228	67.1016		79.1244		79.1244	100.876	6.65643
06_S. arcanum			12.0228	59.5658		71.5885		71.5885	108.411	6.76037
06_S. arcanum			12.0228	56.9761		68.9989		68.9989	111.001	6.79443
06_S. arcanum	8	pos	6.91684	85.0032		78.0864		78.0864	101.914	6.6712
06_S. arcanum			6.91684	83.8061		76.8893		76.8893	103.111	6.68805
06_S. arcanum			6.91684		76.8908		83.8076	83.8076	96.1924	6.58785
06_S. arcanum			6.91684	78.3497		71.4329		71.4329	108.567	6.76244
06_S. arcanum			6.91684	64.949		58.0322		58.0322	121.968	6.93036
06_S. arcanum			6.91684		68.3372		75.254	75.254	104.746	6.71075
06_S. arcanum			6.91684	82.0304		75.1136		75.1136	104.886	6.71268
06_S. arcanum	9	pos	21.6336		62.549		84.1826	84.1826	95.8174	6.58222
06_S. arcanum			21.6336	90		68.3664		68.3664	111.634	6.80263
06_S. arcanum			21.6336		45.5787		67.2123	67.2123	112.788	6.81747
06_S. arcanum	10	neg	4.36458		84.0355		79.6709	79.6709	100.329	6.6486
06_S. arcanum			4.36458	69.444		73.8085		73.8085	106.191	6.73052
06_S. arcanum			4.36458	66.1613		70.5258		70.5258	109.474	6.77445
06_S. arcanum			4.36458		74.5214		70.1568	70.1568	109.843	6.7793
06_S. arcanum			4.36458	60.0685		64.4331		64.4331	115.567	6.85258
06_S. arcanum			4.36458	59.9876		64.3521		64.3521	115.648	6.85359
06_S. arcanum			4.36458		76.1453		71.7807	71.7807	108.219	6.75781
06_S. arcanum			4.36458		88.0908		83.7263	83.7263	96.2737	6.58907
06_S. arcanum			4.36458	74.7277		79.0923		79.0923	100.908	6.65689
06_S. arcanum			4.36458	74.4222		78.7868		78.7868	101.213	6.66125
06_S. arcanum	11	pos	26.9146		63.4349		90.3496	90.3496	89.6504	6.48624
06_S. arcanum			26.9146	76.4052		49.4906		49.4906	130.509	7.02801
06_S. arcanum	12	pos	25.9216		45.6511		71.5727	71.5727	108.427	6.76058
06_S. arcanum			25.9216	84.5164		58.5948		58.5948	121.405	6.92369
06_S. arcanum			25.9216	90		64.0784		64.0784	115.922	6.85701
06_S. arcanum			25.9216	81.573		55.6514		55.6514	124.349	6.95825
06_S. arcanum			25.9216	84.0222		58.1006		58.1006	121.899	6.92955
06_S. arcanum			25.9216		41.9872		67.9088	67.9088	112.091	6.80853
06_S. arcanum	13	neg	10.581	76.1713		86.7523		86.7523	93.2477	6.543
06_S. arcanum			10.581		86.0818		75.5008	75.5008	104.499	6.70735
06_S. arcanum			10.581	74.9889		85.5699		85.5699	94.4301	6.56118
06_S. arcanum	14	pos	18.5599		74.6872		93.2471	93.2471	86.7529	6.43884
06_S. arcanum				87.0391		68.4791		68.4791	111.521	6.80117
06_S. arcanum	16	pos	6.03768	78.0031		71.9654		71.9654	108.035	6.75535
06_S. arcanum	19	pos	31.2202	87.732		56.5119		56.5119	123.488	6.94823
06_S. arcanum					64.5583		95.7784	95.7784	84.2216	6.39612
06_S. arcanum					32.3196		63.5398	63.5398	116.46	6.86369
06_S. arcanum	20	neg	12.7496		85.3331		72.5836	72.5836	107.416	6.74707
06_S. arcanum				74.0546		86.8042		86.8042	93.1958	6.54219
06_S. arcanum					78.7812		66.0316	66.0316	113.968	6.83249
06_S. arcanum				69.444		82.1935		82.1935	97.8065	6.61186
06_S. arcanum	21	neg	17.7004		90		72.2996	72.2996	107.7	6.75088
06_S. arcanum					74.3379		56.6375	56.6375	123.363	6.94676
06_S. arcanum				64.1913		81.8917		81.8917	98.1083	6.6163
06_S. arcanum				70.9588		88.6592		88.6592	91.3408	6.51319
06_S. arcanum				53.8264		71.5268		71.5268	108.473	6.76119
07_S. galapagense	2	neg	37.5534		78.3462		40.7927	40.7927	139.207	7.12109
07_S. galapagense			37.5534	12.0948		49.6482		49.6482	130.352	7.02627
07_S. galapagense			37.5534		80.651		43.0976	43.0976	136.902	7.097
07_S. galapagense			37.5534		84.8056		47.2521	47.2521	132.748	7.05254
07_S. galapagense			37.5534	43.977		81.5304		81.5304	98.4696	6.62161
07_S. galapagense			37.5534		90		52.4466	52.4466	127.553	6.99496
07_S. galapagense	4	neg	11.2863	39.3878		50.6741		50.6741	129.326	7.01487
07_S. galapagense			11.2863	42.1844		53.4707		53.4707	126.529	6.98333
07_S. galapagense			11.2863		75.9638		64.6775	64.6775	115.323	6.84953
07_S. galapagense			11.2863	71.0535		82.3398		82.3398	97.6602	6.6097
07_S. galapagense			11.2863	71.9802		83.2665		83.2665	96.7335	6.59594
07_S. galapagense			11.2863		71.1468		59.8606	59.8606	120.139	6.90857
07_S. galapagense	5	neg	21.1821		65.4059		44.2238	44.2238	135.776	7.08509
07_S. galapagense			21.1821		74.299		53.1169	53.1169	126.883	6.98736
07_S. galapagense			21.1821		49.3383		28.1562	28.1562	151.844	7.24644
07_S. galapagense			21.1821	62.5924		83.7745		83.7745	96.2255	6.58835
07_S. galapagense			21.1821	38.3333		59.5154		59.5154	120.485	6.9127
07_S. galapagense			21.1821		83.6598		62.4777	62.4777	117.522	6.87679
07_S. galapagense	6	pos	16.9341	64.1211		47.187		47.187	132.813	7.05325
07_S. galapagense			16.9341	65.8286		48.8945		48.8945	131.106	7.03458
07_S. galapagense			16.9341		66.9487		83.8828	83.8828	96.1172	6.58672
07_S. galapagense			16.9341		60.0184		76.9525	76.9525	103.048	6.68717
07_S. galapagense			16.9341		75.2564		92.1905	92.1905	87.8095	6.4563
07_S. galapagense			16.9341	68.0513		51.1172		51.1172	128.883	7.00992
07_S. galapagense			16.9341		62.8787		79.8128	79.8128	100.187	6.64655
07_S. galapagense			16.9341	58.5704		41.6363		41.6363	138.364	7.11232
07_S. galapagense	7	pos	6.07678		72.8332		78.91	78.91	101.09	6.6595
07_S. galapagense			6.07678	86.7559		80.6792		80.6792	99.3208	6.63402
07_S. galapagense			6.07678		72.2437		78.3204	78.3204	101.68	6.66789
07_S. galapagense			6.07678	60.3047		54.2279		54.2279	125.772	6.97467
07_S. galapagense			6.07678		57.5143		63.5911	63.5911	116.409	6.86306
07_S. galapagense			6.07678	79.6952		73.6184		73.6184	106.382	6.73311
07_S. galapagense			6.07678	65.031		58.9542		58.9542	121.046	6.91941
07_S. galapagense	8	pos	13.0316	63.7021		50.6705		50.6705	129.33	7.01491
07_S. galapagense			13.0316	46.4879		33.4563		33.4563	146.544	7.19519
07_S. galapagense			13.0316	41.6335		28.602		28.602	151.398	7.2422
07_S. galapagense	9	pos	1.79439		55.5735		57.3679	57.3679	122.632	6.93819
07_S. galapagense			1.79439	58.4957		56.7013		56.7013	123.299	6.94601
07_S. galapagense			1.79439		64.6986		66.493	66.493	113.507	6.82664
07_S. galapagense			1.79439	55.1755		53.3811		53.3811	126.619	6.98435
07_S. galapagense			1.79439		70.2532		72.0476	72.0476	107.952	6.75425
07_S. galapagense			1.79439		60.2551		62.0495	62.0495	117.95	6.88204
07_S. galapagense			1.79439	63.4349		61.6406		61.6406	118.359	6.88703
07_S. galapagense	11	pos	15.0004	72.0309		57.0305		57.0305	122.969	6.94216
07_S. galapagense			15.0004	78.1113		63.111		63.111	116.889	6.869
07_S. galapagense	12	neg	6.96826	53.4913		60.4596		60.4596	119.54	6.90135
07_S. galapagense			6.96826	86.8202		93.7884		93.7884	86.2116	6.42981
07_S. galapagense			6.96826		74.0546		67.0863	67.0863	112.914	6.81908
07_S. galapagense			6.96826	57.3492		64.3175		64.3175	115.683	6.85403
07_S. galapagense			6.96826	64.7468		71.7151		71.7151	108.285	6.75869
07_S. galapagense	13	neg	7.9164	48.1798		56.0962		56.0962	123.904	6.95308
07_S. galapagense			7.9164		70.2481		62.3317	62.3317	117.668	6.87858
07_S. galapagense			7.9164		55.7945		47.8781	47.8781	132.122	7.04573
07_S. galapagense			7.9164		66.3179		58.4015	58.4015	121.598	6.92598
07_S. galapagense			7.9164	58.6097		66.5261		66.5261	113.474	6.82622
07_S. galapagense			7.9164		51.5819		43.6655	43.6655	136.334	7.09101
07_S. galapagense			7.9164	65.556		73.4724		73.4724	106.528	6.73508
08_S. cheesmaniae	2	neg	5.87553		46.7649		40.8893	40.8893	139.111	7.12009
08_S. cheesmaniae			5.87553	82.3423		88.2178		88.2178	91.7822	6.52014
08_S. cheesmaniae			5.87553	80.1807		86.0562		86.0562	93.9438	6.55373
08_S. cheesmaniae			5.87553		52.5563		46.6808	46.6808	133.319	7.05874
08_S. cheesmaniae			5.87553	84.4084		90.284		90.284	89.716	6.48729
08_S. cheesmaniae			5.87553	53.8418		59.7173		59.7173	120.283	6.91028
08_S. cheesmaniae			5.87553	61.5571		67.4326		67.4326	112.567	6.81465
08_S. cheesmaniae			5.87553	41.8202		47.6957		47.6957	132.304	7.04772
08_S. cheesmaniae	3	pos	14.434	86.8892		72.4552		72.4552	107.545	6.74879
08_S. cheesmaniae			14.434	68.4399		54.0059		54.0059	125.994	6.97721
08_S. cheesmaniae			14.434		56.3099		70.7439	70.7439	109.256	6.77157
08_S. cheesmaniae			14.434		59.8863		74.3203	74.3203	105.68	6.72355
08_S. cheesmaniae	4	neg	3.89441		70.5792		66.6848	66.6848	113.315	6.8242
08_S. cheesmaniae			3.89441	74.8022		78.6966		78.6966	101.303	6.66254
08_S. cheesmaniae			3.89441	80.2867		84.1812		84.1812	95.8188	6.58224
08_S. cheesmaniae			3.89441	63.2654		67.1598		67.1598	112.84	6.81814
08_S. cheesmaniae			3.89441		74.389		70.4946	70.4946	109.505	6.77486
08_S. cheesmaniae			3.89441	45.7073		49.6017		49.6017	130.398	7.02678
08_S. cheesmaniae	5	neg	3.46048		50.5275		47.0671	47.0671	132.933	7.05455
08_S. cheesmaniae			3.46048	82.725		86.1855		86.1855	93.8145	6.55174
08_S. cheesmaniae			3.46048	57.019		60.4795		60.4795	119.521	6.90111
08_S. cheesmaniae			3.46048		48.8655		45.405	45.405	134.595	7.07248
08_S. cheesmaniae	6	pos	5.93798	52.3524		46.4144		46.4144	133.586	7.06162
08_S. cheesmaniae					62.7529		68.6909	68.6909	111.309	6.79843
08_S. cheesmaniae	7	neg	18.4805		75.1212		56.6407	56.6407	123.359	6.94672
08_S. cheesmaniae					78.1664		59.6858	59.6858	120.314	6.91066
08_S. cheesmaniae				36.3844		54.8649		54.8649	125.135	6.96734
08_S. cheesmaniae	8	pos	12.2707		64.6986		76.9693	76.9693	103.031	6.68693
08_S. cheesmaniae					52.0013		64.272	64.272	115.728	6.85459
08_S. cheesmaniae	9	pos	8.64791	73.3008		64.6528		64.6528	115.347	6.84984
08_S. cheesmaniae				51.9366		43.2887		43.2887	136.711	7.09499
08_S. cheesmaniae				81.8699		73.222		73.222	106.778	6.73847
08_S. cheesmaniae	12	neg	9.4247		49.9937		40.569	40.569	139.431	7.12341
08_S. cheesmaniae	14	pos	6.81522		74.8508		81.666	81.666	98.334	6.61962
08_S. cheesmaniae				80.3718		73.5566		73.5566	106.443	6.73394
08_S. cheesmaniae					42.965		49.7802	49.7802	130.22	7.02481
08_S. cheesmaniae					48.2052		55.0204	55.0204	124.98	6.96555
08_S. cheesmaniae					51.5198		58.335	58.335	121.665	6.92677
08_S. cheesmaniae					50.6176		57.4328	57.4328	122.567	6.93743
09_S. pimpinelifollium	1	pos	7.84854	89.1987		81.3502		81.3502	98.6498	6.62424
09_S. pimpinelifollium			7.84854	79.3803		71.5318		71.5318	108.468	6.76113
09_S. pimpinelifollium			7.84854	76.3599		68.5113		68.5113	111.489	6.80075
09_S. pimpinelifollium			7.84854		76.3858		84.2344	84.2344	95.7656	6.58144
09_S. pimpinelifollium			7.84854	84.1226		76.2741		76.2741	103.726	6.69663
09_S. pimpinelifollium			7.84854	76.0028		68.1543		68.1543	111.846	6.80537
09_S. pimpinelifollium			7.84854		71.6111		79.4597	79.4597	100.54	6.65163
09_S. pimpinelifollium			7.84854	78.9063		71.0577		71.0577	108.942	6.76742
09_S. pimpinelifollium			7.84854	80.2176		72.3691		72.3691	107.631	6.74995
09_S. pimpinelifollium			7.84854	49.6463		41.7978		41.7978	138.202	7.11064
09_S. pimpinelifollium			7.84854	63.4349		55.5864		55.5864	124.414	6.959
09_S. pimpinelifollium			7.84854	38.2516		30.4031		30.4031	149.597	7.22494
09_S. pimpinelifollium			7.84854		90		97.8485	97.8485	82.1515	6.36021
09_S. pimpinelifollium			7.84854		85.452		93.3005	93.3005	86.6995	6.43795
09_S. pimpinelifollium			7.84854		48.4474		56.2959	56.2959	123.704	6.95075
09_S. pimpinelifollium			7.84854		52.5394		60.388	60.388	119.612	6.90222
09_S. pimpinelifollium			7.84854		62.1759		70.0244	70.0244	109.976	6.78104
09_S. pimpinelifollium	2	neg	0.636152		41.2414		40.6053	40.6053	139.395	7.12303
09_S. pimpinelifollium			0.636152	28.0092		28.6453		28.6453	151.355	7.24179
09_S. pimpinelifollium			0.636152	85.1502		85.7863		85.7863	94.2137	6.55786
09_S. pimpinelifollium			0.636152	74.5333		75.1694		75.1694	104.831	6.71192
09_S. pimpinelifollium			0.636152	83.491		84.1272		84.1272	95.8728	6.58305
09_S. pimpinelifollium			0.636152		90		89.3638	89.3638	90.6362	6.50201
09_S. pimpinelifollium			0.636152		85.3013		84.6652	84.6652	95.3348	6.57493
09_S. pimpinelifollium			0.636152		77.8709		77.2348	77.2348	102.765	6.68321
09_S. pimpinelifollium			0.636152		49.4556		48.8195	48.8195	131.181	7.03541
09_S. pimpinelifollium			0.636152	73.2685		73.9047		73.9047	106.095	6.72922
09_S. pimpinelifollium			0.636152		70.416		69.7799	69.7799	110.22	6.78424
09_S. pimpinelifollium			0.636152	57.5933		58.2295		58.2295	121.771	6.92802
09_S. pimpinelifollium			0.636152		72.6025		71.9663	71.9663	108.034	6.75534
09_S. pimpinelifollium	3	pos	16.1773	70.9355		54.7582		54.7582	125.242	6.96857
09_S. pimpinelifollium			16.1773	60.5241		44.3469		44.3469	135.653	7.08378
09_S. pimpinelifollium			16.1773		18.0939		34.2712	34.2712	145.729	7.18714
09_S. pimpinelifollium			16.1773		72.0956		88.2728	88.2728	91.7272	6.51928
09_S. pimpinelifollium			16.1773		67.6713		83.8486	83.8486	96.1514	6.58724
09_S. pimpinelifollium			16.1773		40.6308		56.8081	56.8081	123.192	6.94476
09_S. pimpinelifollium			16.1773	73.3856		57.2083		57.2083	122.792	6.94007
09_S. pimpinelifollium			16.1773	82.606		66.4287		66.4287	113.571	6.82745
09_S. pimpinelifollium			16.1773		48.764		64.9413	64.9413	115.059	6.84623
09_S. pimpinelifollium			16.1773	89.6745		73.4972		73.4972	106.503	6.73475
09_S. pimpinelifollium			16.1773		58.3925		74.5698	74.5698	105.43	6.72015
09_S. pimpinelifollium			16.1773		40.3207		56.498	56.498	123.502	6.94839
09_S. pimpinelifollium			16.1773		39.8896		56.0668	56.0668	123.933	6.95342
09_S. pimpinelifollium			16.1773		27.0309		43.2081	43.2081	136.792	7.09584
09_S. pimpinelifollium	4	pos	1.23198		79.9089		81.1409	81.1409	98.8591	6.6273
09_S. pimpinelifollium			1.23198		56.5346		57.7666	57.7666	122.233	6.93349
09_S. pimpinelifollium			1.23198	83.492		82.26		82.26	97.74	6.61088
09_S. pimpinelifollium			1.23198	75.6672		74.4352		74.4352	105.565	6.72198
09_S. pimpinelifollium			1.23198	54.2933		53.0613		53.0613	126.939	6.98799
09_S. pimpinelifollium			1.23198	38.9833		37.7514		37.7514	142.249	7.15227
09_S. pimpinelifollium			1.23198		82.0425		83.2745	83.2745	96.7255	6.59583
09_S. pimpinelifollium			1.23198		53.8068		55.0388	55.0388	124.961	6.96534
09_S. pimpinelifollium			1.23198	83.7966		82.5646		82.5646	97.4354	6.60637
09_S. pimpinelifollium			1.23198	78.2749		77.0429		77.0429	102.957	6.6859
09_S. pimpinelifollium			1.23198		63.4349		64.6669	64.6669	115.333	6.84966
09_S. pimpinelifollium			1.23198		40.5488		41.7808	41.7808	138.219	7.11081
09_S. pimpinelifollium			1.23198	70.0169		68.7849		68.7849	111.215	6.79721
09_S. pimpinelifollium			1.23198		57.9946		59.2266	59.2266	120.773	6.91616
09_S. pimpinelifollium	5	neg	8.00642		79.7778		71.7714	71.7714	108.229	6.75794
09_S. pimpinelifollium			8.00642	60.4058		68.4123		68.4123	111.588	6.80203
09_S. pimpinelifollium			8.00642	71.6668		79.6732		79.6732	100.327	6.64856
09_S. pimpinelifollium			8.00642	75.7873		83.7937		83.7937	96.2063	6.58806
09_S. pimpinelifollium			8.00642	72.5408		80.5472		80.5472	99.4528	6.63594
09_S. pimpinelifollium			8.00642		75.3027		67.2963	67.2963	112.704	6.81639
09_S. pimpinelifollium			8.00642		79.3803		71.3739	71.3739	108.626	6.76323
09_S. pimpinelifollium			8.00642	59.6973		67.7037		67.7037	112.296	6.81117
09_S. pimpinelifollium			8.00642	54.8336		62.84		62.84	117.16	6.87234
09_S. pimpinelifollium			8.00642		61.1443		53.1379	53.1379	126.862	6.98712
09_S. pimpinelifollium			8.00642	61.8401		69.8465		69.8465	110.153	6.78337
09_S. pimpinelifollium			8.00642		82.3039		74.2975	74.2975	105.702	6.72387
09_S. pimpinelifollium	6	pos	13.5218		62.6501		76.1719	76.1719	103.828	6.69805
09_S. pimpinelifollium			13.5218	73.2127		59.6909		59.6909	120.309	6.9106
09_S. pimpinelifollium			13.5218	89.4776		75.9558		75.9558	104.044	6.70105
09_S. pimpinelifollium			13.5218	84.2894		70.7676		70.7676	109.232	6.77126
09_S. pimpinelifollium			13.5218		72.5931		86.1149	86.1149	93.8851	6.55282
09_S. pimpinelifollium			13.5218	68.7284		55.2066		55.2066	124.793	6.9634
09_S. pimpinelifollium			13.5218		67.7009		81.2226	81.2226	98.7774	6.62611
09_S. pimpinelifollium			13.5218	78.3885		64.8667		64.8667	115.133	6.84716
09_S. pimpinelifollium			13.5218		66.2028		79.7246	79.7246	100.275	6.64782
09_S. pimpinelifollium			13.5218		60.3409		73.8627	73.8627	106.137	6.72979
09_S. pimpinelifollium			13.5218	78.2649		64.7431		64.7431	115.257	6.84871
09_S. pimpinelifollium			13.5218	75.8445		62.3227		62.3227	117.677	6.87869
09_S. pimpinelifollium			13.5218	70.8316		57.3098		57.3098	122.69	6.93888
09_S. pimpinelifollium			13.5218		55.0607		68.5825	68.5825	111.418	6.79983
09_S. pimpinelifollium			13.5218	88.6678		75.146		75.146	104.854	6.71224
09_S. pimpinelifollium			13.5218		47.9508		61.4726	61.4726	118.527	6.88908
09_S. pimpinelifollium			13.5218	86.3086		72.7868		72.7868	107.213	6.74434
09_S. pimpinelifollium			13.5218	84.0939		70.5721		70.5721	109.428	6.77384
09_S. pimpinelifollium	7	neg	1.26235	54.5332		55.7956		55.7956	124.204	6.95657
09_S. pimpinelifollium			1.26235	41.1083		42.3707		42.3707	137.629	7.10464
09_S. pimpinelifollium			1.26235		85.4999		84.2375	84.2375	95.7625	6.58139
09_S. pimpinelifollium			1.26235		40.4577		39.1953	39.1953	140.805	7.13755
09_S. pimpinelifollium			1.26235	75.6186		76.881		76.881	103.119	6.68817
09_S. pimpinelifollium			1.26235	77.692		78.9543		78.9543	101.046	6.65886
09_S. pimpinelifollium			1.26235	66.275		67.5373		67.5373	112.463	6.8133
09_S. pimpinelifollium			1.26235	86.4862		87.7486		87.7486	92.2514	6.5275
09_S. pimpinelifollium			1.26235		46.8779		45.6155	45.6155	134.384	7.07022
09_S. pimpinelifollium			1.26235	40.2364		41.4987		41.4987	138.501	7.11376
09_S. pimpinelifollium			1.26235		68.3852		67.1229	67.1229	112.877	6.81861
09_S. pimpinelifollium			1.26235		68.0913		66.8289	66.8289	113.171	6.82236
09_S. pimpinelifollium			1.26235	82.875		84.1373		84.1373	95.8627	6.5829
09_S. pimpinelifollium			1.26235	64.7989		66.0612		66.0612	113.939	6.83212
09_S. pimpinelifollium	8	pos	16.3115	79.3461		63.0346		63.0346	116.965	6.86994
09_S. pimpinelifollium			16.3115	78.3996		62.088		62.088	117.912	6.88157
09_S. pimpinelifollium			16.3115		85.8043		102.116	102.116	77.8841	6.28326
09_S. pimpinelifollium			16.3115		77.7909		94.1024	94.1024	85.8976	6.42455
09_S. pimpinelifollium			16.3115		72.5042		88.8158	88.8158	91.1842	6.51071
09_S. pimpinelifollium			16.3115		74.4759		90.7874	90.7874	89.2126	6.47918
09_S. pimpinelifollium			16.3115		68.7653		85.0768	85.0768	94.9232	6.56869
09_S. pimpinelifollium			16.3115		47.854		64.1656	64.1656	115.834	6.85592
09_S. pimpinelifollium			16.3115		55.5347		71.8462	71.8462	108.154	6.75694
09_S. pimpinelifollium			16.3115	82.4054		66.0938		66.0938	113.906	6.8317
09_S. pimpinelifollium			16.3115		45.5907		61.9022	61.9022	118.098	6.88384
09_S. pimpinelifollium			16.3115		52.0208		68.3323	68.3323	111.668	6.80307
09_S. pimpinelifollium			16.3115		54.5829		70.8945	70.8945	109.106	6.76958
09_S. pimpinelifollium	9	pos	14.9907		49.3987		64.3895	64.3895	115.611	6.85313
09_S. pimpinelifollium			14.9907	87.776		72.7853		72.7853	107.215	6.74436
09_S. pimpinelifollium			14.9907	87.9607		72.9699		72.9699	107.03	6.74187
09_S. pimpinelifollium			14.9907		55.1642		70.1549	70.1549	109.845	6.77933
09_S. pimpinelifollium			14.9907	89.7924		74.8017		74.8017	105.198	6.71697
09_S. pimpinelifollium			14.9907		70.3197		85.3104	85.3104	94.6896	6.56513
09_S. pimpinelifollium			14.9907	77.3518		62.3611		62.3611	117.639	6.87822
09_S. pimpinelifollium			14.9907	80.5377		65.5469		65.5469	114.453	6.83861
09_S. pimpinelifollium			14.9907		64.8469		79.8376	79.8376	100.162	6.6462
09_S. pimpinelifollium			14.9907	86.3322		71.3415		71.3415	108.659	6.76366
09_S. pimpinelifollium			14.9907		27.8381		42.8288	42.8288	137.171	7.09983
09_S. pimpinelifollium			14.9907		52.9801		67.9709	67.9709	112.029	6.80773
09_S. pimpinelifollium			14.9907	80.651		65.6603		65.6603	114.34	6.83718
09_S. pimpinelifollium			14.9907	72.3499		57.3591		57.3591	122.641	6.9383
09_S. pimpinelifollium			14.9907		57.5288		72.5196	72.5196	107.48	6.74793
09_S. pimpinelifollium			14.9907	78.9591		63.9683		63.9683	116.032	6.85838
09_S. pimpinelifollium			14.9907		65.0952		80.086	80.086	99.914	6.64262
09_S. pimpinelifollium			14.9907	85.7636		70.7729		70.7729	109.227	6.77119
09_S. pimpinelifollium	10	pos	6.04914	75.7302		69.6811		69.6811	110.319	6.78554
09_S. pimpinelifollium			6.04914		76.7809		82.8301	82.8301	97.1699	6.60244
09_S. pimpinelifollium			6.04914		72.6844		78.7335	78.7335	101.266	6.66201
09_S. pimpinelifollium			6.04914		59.1911		65.2402	65.2402	114.76	6.84247
09_S. pimpinelifollium			6.04914	49.6463		43.5972		43.5972	136.403	7.09173
09_S. pimpinelifollium			6.04914	77.389		71.3398		71.3398	108.66	6.76368
09_S. pimpinelifollium			6.04914		51.6388		57.6879	57.6879	122.312	6.93442
09_S. pimpinelifollium			6.04914	86.0091		79.9599		79.9599	100.04	6.64443
09_S. pimpinelifollium			6.04914	71.2306		65.1814		65.1814	114.819	6.84321
09_S. pimpinelifollium			6.04914	68.5523		62.5031		62.5031	117.497	6.87648
09_S. pimpinelifollium			6.04914		65.0024		71.0515	71.0515	108.949	6.7675
09_S. pimpinelifollium			6.04914	44.0608		38.0117		38.0117	141.988	7.14963
09_S. pimpinelifollium	11	pos	0.771477		49.8991		50.6706	50.6706	129.329	7.01491
09_S. pimpinelifollium			0.771477	72.6915		71.92		71.92	108.08	6.75596
09_S. pimpinelifollium			0.771477		72.812		73.5835	73.5835	106.417	6.73358
09_S. pimpinelifollium			0.771477		75.7932		76.5647	76.5647	103.435	6.69258
09_S. pimpinelifollium			0.771477		67.4042		68.1757	68.1757	111.824	6.80509
09_S. pimpinelifollium			0.771477		61.3417		62.1131	62.1131	117.887	6.88126
09_S. pimpinelifollium			0.771477	77.8948		77.1233		77.1233	102.877	6.68477
09_S. pimpinelifollium			0.771477	86.3255		85.554		85.554	94.446	6.56142
09_S. pimpinelifollium			0.771477	52.6366		51.8651		51.8651	128.135	7.00152
09_S. pimpinelifollium			0.771477	85.5328		84.7614		84.7614	95.2386	6.57348
09_S. pimpinelifollium			0.771477	41.0091		40.2376		40.2376	139.762	7.12683
09_S. pimpinelifollium			0.771477		83.5277		84.2992	84.2992	95.7008	6.58046
09_S. pimpinelifollium			0.771477	71.222		70.4505		70.4505	109.55	6.77544
09_S. pimpinelifollium			0.771477		55.008		55.7795	55.7795	124.221	6.95676
09_S. pimpinelifollium			0.771477	62.6223		61.8508		61.8508	118.149	6.88447
09_S. pimpinelifollium			0.771477		66.5909		67.3624	67.3624	112.638	6.81554
09_S. pimpinelifollium			0.771477	71.5651		70.7936		70.7936	109.206	6.77091
09_S. pimpinelifollium			0.771477	54.7824		54.0109		54.0109	125.989	6.97715
09_S. pimpinelifollium	13	neg	16.4581		59.0362		42.5782	42.5782	137.422	7.10247
09_S. pimpinelifollium			16.4581	78.5729		95.031		95.031	84.969	6.40887
09_S. pimpinelifollium			16.4581		57.1143		40.6562	40.6562	139.344	7.1225
09_S. pimpinelifollium			16.4581	52.5591		69.0171		69.0171	110.983	6.79419
09_S. pimpinelifollium			16.4581	63.4349		79.893		79.893	100.107	6.6454
09_S. pimpinelifollium			16.4581	59.1263		75.5843		75.5843	104.416	6.70619
09_S. pimpinelifollium			16.4581	59.5409		75.999		75.999	104.001	6.70045
09_S. pimpinelifollium			16.4581		83.7966		67.3385	67.3385	112.662	6.81585
09_S. pimpinelifollium			16.4581		89.2655		72.8074	72.8074	107.193	6.74406
09_S. pimpinelifollium			16.4581	18.1329		34.5909		34.5909	145.409	7.18397
09_S. pimpinelifollium			16.4581		76.9792		60.5212	60.5212	119.479	6.90061
09_S. pimpinelifollium			16.4581		85.4261		68.968	68.968	111.032	6.79483
09_S. pimpinelifollium			16.4581		77.1756		60.7175	60.7175	119.282	6.89824
09_S. pimpinelifollium			16.4581		75.2564		58.7984	58.7984	121.202	6.92127
09_S. pimpinelifollium			16.4581		79.4608		63.0028	63.0028	116.997	6.87033
09_S. pimpinelifollium	14	neg	15.6999	89.0179		104.718		104.718	75.2822	6.23424
09_S. pimpinelifollium			15.6999		69.3701		53.6702	53.6702	126.33	6.98105
09_S. pimpinelifollium			15.6999	54.5667		70.2666		70.2666	109.733	6.77786
09_S. pimpinelifollium			15.6999	66.0375		81.7374		81.7374	98.2626	6.61857
09_S. pimpinelifollium			15.6999		82.875		67.1751	67.1751	112.825	6.81794
09_S. pimpinelifollium			15.6999	64.44		80.14		80.14	99.86	6.64184
09_S. pimpinelifollium			15.6999	36.3935		52.0934		52.0934	127.907	6.99895
09_S. pimpinelifollium			15.6999		78.6901		62.9901	62.9901	117.01	6.87049
09_S. pimpinelifollium			15.6999	19.0726		34.7725		34.7725	145.228	7.18217
09_S. pimpinelifollium			15.6999		85.0517		69.3517	69.3517	110.648	6.78984
09_S. pimpinelifollium			15.6999	58.7099		74.4098		74.4098	105.59	6.72233
09_S. pimpinelifollium			15.6999		63.2691		47.5692	47.5692	132.431	7.04909
09_S. pimpinelifollium			15.6999	65.2249		80.9248		80.9248	99.0752	6.63045
09_S. pimpinelifollium			15.6999		49.521		33.821	33.821	146.179	7.19159
09_S. pimpinelifollium			15.6999		55.8855		40.1856	40.1856	139.814	7.12737
09_S. pimpinelifollium			15.6999	64.0935		79.7934		79.7934	100.207	6.64683
09_S. pimpinelifollium	18	pos	22.4394	59.9314		37.492		37.492	142.508	7.1549
09_S. pimpinelifollium			22.4394	83.5451		61.1057		61.1057	118.894	6.89354
09_S. pimpinelifollium			22.4394		82.9635		105.403	105.403	74.5971	6.22105
09_S. pimpinelifollium			22.4394	69.7152		47.2758		47.2758	132.724	7.05229
09_S. pimpinelifollium			22.4394	84.4547		62.0153		62.0153	117.985	6.88246
09_S. pimpinelifollium			22.4394		81.2739		103.713	103.713	76.2867	6.25336
09_S. pimpinelifollium			22.4394		65.6589		88.0983	88.0983	91.9017	6.52202
09_S. pimpinelifollium			22.4394		63.9158		86.3552	86.3552	93.6448	6.54913
09_S. pimpinelifollium			22.4394	80.9982		58.5589		58.5589	121.441	6.92411
09_S. pimpinelifollium			22.4394	80.5377		58.0983		58.0983	121.902	6.92957
09_S. pimpinelifollium			22.4394		42.594		65.0334	65.0334	114.967	6.84507
09_S. pimpinelifollium			22.4394		29.67		52.1094	52.1094	127.891	6.99877
09_S. pimpinelifollium			22.4394		20.8068		43.2462	43.2462	136.754	7.09544
09_S. pimpinelifollium			22.4394	70.56		48.1206		48.1206	131.879	7.04308
09_S. pimpinelifollium			22.4394		29.0546		51.494	51.494	128.506	7.00569
09_S. pimpinelifollium			22.4394	86.8779		64.4385		64.4385	115.562	6.85252
09_S. pimpinelifollium	19	pos	8.53818		83.9515		92.4897	92.4897	87.5103	6.45138
09_S. pimpinelifollium			8.53818		77.6428		86.181	86.181	93.819	6.55181
09_S. pimpinelifollium			8.53818	86.3007		77.7625		77.7625	102.237	6.67578
09_S. pimpinelifollium			8.53818	86.0884		77.5502		77.5502	102.45	6.67877
09_S. pimpinelifollium			8.53818		66.1135		74.6517	74.6517	105.348	6.71902
09_S. pimpinelifollium			8.53818		78.9063		87.4445	87.4445	92.5555	6.53225
09_S. pimpinelifollium			8.53818		78.0939		86.6321	86.6321	93.3679	6.54485
09_S. pimpinelifollium			8.53818	70.9065		62.3683		62.3683	117.632	6.87813
09_S. pimpinelifollium			8.53818	88.456		79.9178		79.9178	100.082	6.64504
09_S. pimpinelifollium			8.53818		67.8143		76.3525	76.3525	103.648	6.69554
09_S. pimpinelifollium			8.53818	81.2825		72.7444		72.7444	107.256	6.74491
09_S. pimpinelifollium			8.53818	87.8789		79.3407		79.3407	100.659	6.65334
09_S. pimpinelifollium			8.53818	77.0054		68.4672		68.4672	111.533	6.80132
09_S. pimpinelifollium			8.53818	81.9776		73.4394		73.4394	106.561	6.73553
09_S. pimpinelifollium			8.53818		52.1578		60.696	60.696	119.304	6.8985
09_S. pimpinelifollium			8.53818	57.704		49.1658		49.1658	130.834	7.0316
09_S. pimpinelifollium			8.53818	63.9465		55.4083		55.4083	124.592	6.96106
09_S. pimpinelifollium			8.53818		75.9638		84.5019	84.5019	95.4981	6.5774
09_S. pimpinelifollium			8.53818	80.5377		71.9995		71.9995	108.001	6.75489
09_S. pimpinelifollium	20	neg	2.11033		86.367		84.2567	84.2567	95.7433	6.5811
09_S. pimpinelifollium			2.11033	84.1844		86.2947		86.2947	93.7053	6.55006
09_S. pimpinelifollium			2.11033		68.904		66.7937	66.7937	113.206	6.82281
09_S. pimpinelifollium			2.11033	56.1038		58.2142		58.2142	121.786	6.9282
09_S. pimpinelifollium			2.11033	88.8003		90.9106		90.9106	89.0894	6.47718
09_S. pimpinelifollium			2.11033		52.125		50.0147	50.0147	129.985	7.0222
09_S. pimpinelifollium			2.11033	75.1497		77.26		77.26	102.74	6.68285
09_S. pimpinelifollium			2.11033		88.9272		86.8168	86.8168	93.1832	6.542
09_S. pimpinelifollium			2.11033		30.8277		28.7173	28.7173	151.283	7.2411
09_S. pimpinelifollium			2.11033	90		92.1103		92.1103	87.8897	6.45762
09_S. pimpinelifollium			2.11033	76.0104		78.1207		78.1207	101.879	6.67072
09_S. pimpinelifollium			2.11033		76.2284		74.1181	74.1181	105.882	6.72631
09_S. pimpinelifollium			2.11033	62.8649		64.9752		64.9752	115.025	6.8458
09_S. pimpinelifollium			2.11033		88.4378		86.3274	86.3274	93.6726	6.54955
09_S. pimpinelifollium			2.11033	51.6544		53.7648		53.7648	126.235	6.97997
09_S. pimpinelifollium			2.11033		90		87.8897	87.8897	92.1103	6.52529
09_S. pimpinelifollium			2.11033	68.1986		70.3089		70.3089	109.691	6.7773
09_S. pimpinelifollium	21	neg	1.16832	77.5132		78.6815		78.6815	101.319	6.66275
09_S. pimpinelifollium			1.16832		75.6135		74.4452	74.4452	105.555	6.72185
09_S. pimpinelifollium			1.16832		82.9297		81.7613	81.7613	98.2387	6.61822
09_S. pimpinelifollium			1.16832	89.7252		90.8935		90.8935	89.1065	6.47746
09_S. pimpinelifollium			1.16832	83.6598		84.8281		84.8281	95.1719	6.57246
09_S. pimpinelifollium			1.16832		74.6742		73.5059	73.5059	106.494	6.73463
09_S. pimpinelifollium			1.16832		61.4538		60.2855	60.2855	119.715	6.90345
09_S. pimpinelifollium			1.16832		61.2456		60.0773	60.0773	119.923	6.90596
09_S. pimpinelifollium			1.16832	77.7577		78.926		78.926	101.074	6.65927
09_S. pimpinelifollium			1.16832	85.6458		86.8141		86.8141	93.1859	6.54204
09_S. pimpinelifollium			1.16832	75.7189		76.8872		76.8872	103.113	6.68808
09_S. pimpinelifollium			1.16832		79.1597		77.9914	77.9914	102.009	6.67255
09_S. pimpinelifollium			1.16832		76.9418		75.7734	75.7734	104.227	6.70358
09_S. pimpinelifollium			1.16832	42.7803		43.9487		43.9487	136.051	7.08801
09_S. pimpinelifollium			1.16832		80.5377		79.3694	79.3694	100.631	6.65293
09_S. pimpinelifollium			1.16832		63.4349		62.2666	62.2666	117.733	6.87938
09_S. pimpinelifollium	22	pos	27.3939	69.2118		41.8179		41.8179	138.182	7.11043
09_S. pimpinelifollium			27.3939		67.6519		95.0458	95.0458	84.9542	6.40861
09_S. pimpinelifollium			27.3939	73.083		45.6891		45.6891	134.311	7.06943
09_S. pimpinelifollium			27.3939	67.0113		39.6174		39.6174	140.383	7.13322
09_S. pimpinelifollium			27.3939		38.8603		66.2542	66.2542	113.746	6.82967
09_S. pimpinelifollium			27.3939	63.0198		35.6259		35.6259	144.374	7.17367
09_S. pimpinelifollium			27.3939		50.5275		77.9214	77.9214	102.079	6.67354
09_S. pimpinelifollium			27.3939		52.5716		79.9655	79.9655	100.034	6.64435
09_S. pimpinelifollium			27.3939		39.2594		66.6533	66.6533	113.347	6.8246
09_S. pimpinelifollium			27.3939	85.0961		57.7022		57.7022	122.298	6.93425
09_S. pimpinelifollium			27.3939		60.4222		87.8161	87.8161	92.1839	6.52644
09_S. pimpinelifollium			27.3939	71.5128		44.1189		44.1189	135.881	7.0862
09_S. pimpinelifollium			27.3939	67.3428		39.9489		39.9489	140.051	7.12981
09_S. pimpinelifollium			27.3939		67.2606		94.6545	94.6545	85.3455	6.41524
09_S. pimpinelifollium			27.3939		66.0375		93.4314	93.4314	86.5686	6.43577
09_S. pimpinelifollium			27.3939		62.5535		89.9474	89.9474	90.0526	6.4927
09_S. pimpinelifollium			27.3939	60.3128		32.9189		32.9189	147.081	7.20047
09_S. pimpinelifollium			27.3939		47.8466		75.2405	75.2405	104.759	6.71094
09_S. pimpinelifollium			27.3939	81.1796		53.7857		53.7857	126.214	6.97973
09_S. pimpinelifollium			27.3939	71.8781		44.4842		44.4842	135.516	7.08232
10_"Ailsa Craig"	1	pos	5.53166		66.6148		72.1464	72.1464	107.854	6.75293
10_"Ailsa Craig"			5.53166		16.5044		22.036	22.036	157.964	7.30345
10_"Ailsa Craig"			5.53166		51.163		56.6947	56.6947	123.305	6.94609
10_"Ailsa Craig"			5.53166		87.3676		92.8992	92.8992	87.1008	6.44461
10_"Ailsa Craig"			5.53166	54.5247		48.993		48.993	131.007	7.0335
10_"Ailsa Craig"			5.53166	72.8318		67.3002		67.3002	112.7	6.81634
10_"Ailsa Craig"			5.53166		40.0794		45.611	45.611	134.389	7.07027
10_"Ailsa Craig"			5.53166	55.7364		50.2048		50.2048	129.795	7.02009
10_"Ailsa Craig"			5.53166		86.7755		92.3071	92.3071	87.6929	6.45439
10_"Ailsa Craig"			5.53166	61.9121		56.3804		56.3804	123.62	6.94976
10_"Ailsa Craig"			5.53166	76.4834		70.9518		70.9518	109.048	6.76882
10_"Ailsa Craig"			5.53166	78.0644		72.5327		72.5327	107.467	6.74775
10_"Ailsa Craig"			5.53166		73.4652		78.9968	78.9968	101.003	6.65826
10_"Ailsa Craig"	2	neg	10.3156	77.2035		87.5192		87.5192	92.4808	6.53108
10_"Ailsa Craig"			10.3156		77.2109		66.8953	66.8953	113.105	6.82152
10_"Ailsa Craig"			10.3156		70.9329		60.6173	60.6173	119.383	6.89945
10_"Ailsa Craig"			10.3156	68.9536		79.2693		79.2693	100.731	6.65436
10_"Ailsa Craig"			10.3156	24.6587		34.9743		34.9743	145.026	7.18016
10_"Ailsa Craig"			10.3156		80.4419		70.1263	70.1263	109.874	6.7797
10_"Ailsa Craig"			10.3156	64.113		74.4286		74.4286	105.571	6.72208
10_"Ailsa Craig"			10.3156	33.5934		43.9091		43.9091	136.091	7.08843
10_"Ailsa Craig"			10.3156	13.3017		23.6174		23.6174	156.383	7.28894
[truncated: 1,922 more rows]

## Sheet: clustering
S. corneliomulleri
[truncated: 202 more rows]
[truncated: 12 more columns]

## Sheet: AR number
genotype	plate	plant	nº AR 12das	nº AR 18 das				12 das
[truncated: 476 more rows]

[truncated: 6 more sheets: AR growth rate, AR initiation time, AR response, AR length, AR growth angle, Maximum AR length]
